# Supplementary material for: Single turnover transient state kinetics reveals processive protein unfolding catalyzed by Escherichia coli ClpB
Source: eLife. 2024 Oct 7;13:RP99052. doi: 10.7554/eLife.99052 (PMC11458177; doi:10.7554/eLife.99052)
Supplement: Figure 1—figure supplement 1—source data 1. — The column labeled ‘no ClpB’ is the data under no ClpB conditions. The columns with ‘+ClpB’ and ‘0, 10, 20, 30, 40 min’ represent the data for conditions with ClpB at different incubation times. The sheet labeled ‘Figure 1—figure supplement 1B’ tabulates the data points for Figure 1—figure supplement 1B. [file elife-99052-fig1-figsupp1-data1.xlsx]

## Sheet: Supp Fig 1 A
Wavelength (nm)	Emission signal		+ ClpB	+ ClpB	+ ClpB	+ ClpB	+ ClpB
	no ClpB		0 min	10 min	20 min	30 min	40 min
530	5541.5		6826.1	6876.1	6904.2	7128.6	7094.5
531	6408.2		7402.1	7586.5	7848	8000.3	7909.1
532	7221.5		8781	8935.4	9054.6	8780	8995.5
533	8064.9		9337.3	9622	9816.5	9734.3	9706.2
534	9371.8		10665	11044	11166	11150	11393
535	11264		12594	12942	13069	12990	13157
536	13234		14902	15165	15162	15475	15243
537	15462		17084	17675	17529	17410	18087
538	17987		19550	20078	20203	20351	21023
539	22003		23358	24172	24537	24097	24857
540	26526		29058	29566	30113	30210	30631
541	32002		34047	35185	35992	36300	37006
542	37750		40853	41978	43153	42473	43327
543	46060		50002	50957	51882	51811	52597
544	55409		59198	62356	62727	62736	63700
545	64859		71048	73166	73804	74240	75310
546	79014		85729	89079	89735	89864	91742
547	96805		105240	108670	109780	109930	111540
548	114680		124710	128960	129730	129980	132800
549	137350		151250	155200	157030	157170	160660
550	163910		179510	185290	188890	187670	190850
551	190960		208910	216810	220460	220340	223110
552	226390		249170	257490	261730	261830	265620
553	268160		295660	305420	310520	310550	316080
554	305500		334970	347620	355730	356290	360610
555	348790		383760	400940	406580	408510	415000
556	396530		435990	455550	461990	463510	471820
557	448570		491740	513420	524220	524630	533600
558	504910		551080	580340	590500	593160	602930
559	548730		601650	633690	645710	646120	657710
560	591910		643450	681820	695350	696730	709770
561	636240		690900	731590	748200	751740	761680
562	682030		734290	786780	801430	805040	819140
563	714650		769670	826710	845950	845960	860360
564	743410		798650	856390	875560	879670	893250
565	765520		818410	887350	906870	909350	920550
566	783850		833800	904010	925060	928830	944400
567	791840		840350	912110	936210	940630	952200
568	792930		842470	915140	939330	942690	958800
569	788590		833030	907760	936950	937340	954540
570	777290		818700	898730	923630	924920	942150
571	760510		799930	878200	905990	909090	922490
572	742700		778020	856010	882340	883330	896540
573	720760		753270	833370	857650	857870	875180
574	694250		725680	804650	827790	829130	844000
575	664920		690130	767530	790000	790080	805760
576	638060		661800	732690	758000	760560	771030
577	614400		637630	707530	728940	732490	745790
578	580620		605690	671060	692130	695830	706700
579	550040		571090	635300	656910	655800	667360
580	525290		543810	606680	625770	627690	639170
581	496450		514350	575380	593530	594660	607100
582	472190		490140	546800	560590	563930	573840
583	444750		463100	515640	533250	533830	540820
584	419150		433540	485990	501700	500900	510840
585	402670		418500	464820	480410	482040	489500
586	382520		396350	442730	456870	454340	462910
587	359890		372410	415350	428280	430330	439590
588	343100		356310	396370	406400	409830	417030
589	330260		344150	380710	393790	393020	399080
590	315820		325690	363780	373930	374590	380540
591	302420		314030	348440	358250	358380	367620
592	290810		299530	333280	343070	345500	348280
593	280910		289530	323560	331940	333690	338530
594	272170		282440	314760	321790	323020	327970
595	263110		273250	302680	311220	311370	316200
596	255150		265630	292210	301600	301270	306530
597	250760		261110	286530	293870	293730	299010
598	244890		254340	280740	287350	289210	294210
599	240210		249860	275460	282890	282350	285870
600	235810		245740	270060	276280	278450	281680
601	232140		241370	266170	272860	271880	277280
602	231610		239550	262360	270670	269800	275010
603	227810		237090	260350	266580	267130	272150
604	226700		235380	256270	265420	263740	270020
605	223080		234190	254780	260940	261450	265310
606	222380		231980	252990	259110	258640	264010
607	218950		229200	249890	255550	256390	261440
608	217550		225930	246380	253710	253800	258420
609	213950		223520	245920	251590	252000	256220
610	212280		220270	241140	246490	247790	252530
611	208220		216530	236260	243100	245150	247900
612	204780		212310	233020	239730	240280	244530
613	199390		207130	228500	235140	234780	239000
614	195670		204690	222580	231160	230450	234660
615	191090		198740	217400	225480	224410	229240
616	185140		192610	213540	218200	216870	222620
617	179060		187940	205380	211870	212100	215690
618	174160		181190	199470	206570	205260	210050
619	168690		176230	194730	200500	199360	203490
620	162530		169290	186920	192380	192390	196080
621	154970		161300	178250	183270	184060	187400
622	147430		155020	170740	176270	176250	177220
623	142440		149480	165520	169130	169790	172430
624	136330		142480	158390	162360	162760	165300
625	129540		136280	150880	153320	153560	156560
626	122370		128420	143070	147880	146470	149050
627	117920		123360	136760	140130	140810	143250
628	112110		116410	130520	134610	134170	136260
629	106320		110910	123380	126420	127060	129610
630	99445		104220	116570	119260	118580	120330
631	95882		100960	110170	114640	113580	116580
632	90067		95256	105030	108620	108540	110210
633	85668		90039	99629	102160	101890	104270
634	80473		85021	93172	96387	96724	98359
635	76433		80981	89566	91783	91985	94090
636	73152		76182	84168	87019	86867	88535
637	69385		72636	80676	82650	82820	84134
638	65501		68241	76827	77981	77866	79256
639	61294		65331	71370	73779	73130	75463
640	59474		61694	68873	70534	70316	72348
641	56205		59229	65392	67898	67455	68499
642	52898		55381	61072	63246	63316	64051
643	50655		53045	58473	60031	59963	61743
644	48156		50875	55872	57584	57696	58722
645	45989		48484	53434	55196	54337	55848
646	44239		46216	51267	52346	52211	53468
647	41658		43761	48339	49623	49025	50174
648	40189		42216	45867	47857	48172	48775
649	38605		40928	44814	45518	45637	46506
650	36726		38735	42086	43149	43343	44447
0

## Sheet: Supp Fig 1 B
	time (min)	Relative increase in fluorescence at 568 nm
	0	0.062473
	10	0.15412
	20	0.18462
	30	0.18886
	40	0.20918
