# Supplementary material for: Single turnover transient state kinetics reveals processive protein unfolding catalyzed by Escherichia coli ClpB
Source: eLife. 2024 Oct 7;13:RP99052. doi: 10.7554/eLife.99052 (PMC11458177; doi:10.7554/eLife.99052)
Supplement: Figure 1—source data 1. — Please note that Figure 1D and E have the exact same data for an incubation time of 600 s. [file elife-99052-fig1-data1.xlsx]

## Sheet: Figure 1 D and E
Figure 1 D			Figure 1 E
time (s)	Relative fluorescence enhancement		time (s)	Relative fluorescence enhancement
Incubation times	600 s		Incubation times	1070 s	1570 s	2070 s
0.0083	-0.031914		0.0094375	0.058632	-0.0042367	-0.0075343
0.016725	0.036026		0.019012	0.083322	-0.028667	-0.036184
0.025275	0.018766		0.028725	0.034992	-0.037077	0.029096
0.033962	0.037176		0.038587	-0.011348	0.031703	0.037046
0.042775	0.088316		0.0486	0.075002	-0.036167	0.096806
0.051725	0.056756		0.058775	-0.00038823	-0.058567	0.010246
0.0608	-0.010884		0.069087	-0.056568	0.019563	-0.029794
0.070013	-0.049934		0.079563	0.032462	0.0072033	-0.042454
0.079375	-0.051444		0.0902	-0.033018	-0.035177	0.031916
0.088875	0.054706		0.10099	-0.023748	-0.022757	0.069586
0.098513	-0.00053412		0.11195	-0.10607	-0.016787	-0.0071443
0.1083	0.025286		0.12308	0.080362	-0.029067	-0.072624
0.11824	0.028876		0.13436	0.020972	-0.064477	0.019926
0.12833	-0.0093141		0.14581	-0.027518	-0.033347	-0.051554
0.13856	0.0025659		0.15745	-0.079168	-0.022147	-0.0058543
0.14895	-0.021264		0.16926	-0.021868	-0.017477	0.029896
0.1595	-0.014904		0.18125	0.017212	0.045543	-0.018804
0.1702	-0.039004		0.19341	-0.072668	-0.052307	0.0062457
0.18108	-0.0093941		0.20576	-0.034918	0.038953	-0.051034
0.1921	-0.034604		0.2183	0.013522	0.032473	0.0092257
0.2033	-0.030684		0.23102	0.016362	0.017353	-0.055254
0.21467	-0.0061241		0.24395	0.076692	-0.027417	0.0093057
0.22621	-0.052534		0.25706	-0.058258	0.0090933	0.021956
0.23792	0.086936		0.27038	-0.023308	0.027243	-0.0033543
0.24981	0.040756		0.28389	-0.021318	0.032483	0.040766
0.26189	-0.021594		0.2976	-0.038028	-0.031167	0.024726
0.27414	0.085476		0.31152	-0.028438	0.00018333	0.0048157
0.28657	-0.050084		0.32566	0.063242	0.084173	-0.011984
0.2992	0.065956		0.34	-0.025228	-0.030057	-0.0064843
0.31203	-0.062154		0.35456	-0.022528	0.018403	0.018256
0.32502	0.041266		0.36935	-0.013418	0.033933	0.020016
0.33824	0.0076559		0.38436	0.053602	0.011843	-0.0047143
0.35164	-0.019384		0.39959	-0.051278	-7.6667e-05	-0.0078643
0.36525	0.056166		0.41505	0.042772	0.010623	-0.021064
0.37906	-0.020344		0.43075	0.0087318	-0.043567	-0.071564
0.39307	0.065956		0.44668	0.091472	0.066993	-0.033634
0.40731	-0.021124		0.46285	0.025792	-0.010337	0.074546
0.42176	0.012816		0.47927	-0.042538	-0.038137	-0.022714
0.43643	-0.032344		0.49594	-0.066638	-0.10239	0.010646
0.45131	-0.050744		0.51285	-0.022548	0.020873	0.022536
0.46643	0.0039559		0.53003	0.020002	0.092263	-0.053754
0.48176	-0.0013141		0.54745	0.0026118	-0.0047667	0.041806
0.49734	0.017606		0.56515	0.0072018	0.0073433	0.071726
0.51314	0.010856		0.58311	0.030922	-0.012397	-0.029164
0.52919	-0.0058341		0.60134	0.0016118	0.0015333	-0.052794
0.54546	-0.016104		0.61985	0.021552	-0.030567	-0.029194
0.562	-0.025504		0.63864	-0.00024824	0.098363	-0.014524
0.57879	-0.039604		0.65771	0.0059218	0.0054133	0.022086
0.59581	-0.076794		0.67706	-0.035508	0.022313	-0.048734
0.61311	-0.032404		0.69671	0.023972	0.024643	0.021476
0.63066	-0.0060041		0.71666	0.0076318	0.028613	0.045136
0.64847	-0.0027541		0.73691	0.010662	0.013193	-0.015244
0.66656	-0.024034		0.75746	0.026592	0.023513	-0.028044
0.68493	-0.013714		0.77833	0.024382	0.014913	-0.0070043
0.70356	-0.00072412		0.7995	-0.024918	-0.022267	-0.088724
0.72247	0.0068359		0.821	0.065502	0.0023933	-0.067664
0.74169	-0.021324		0.84282	0.010932	-0.036267	0.00026569
0.76117	0.061066		0.86497	-0.0038282	-0.024417	0.024816
0.78096	-0.065954		0.88746	-0.011808	0.036613	0.017376
0.80105	-0.00081412		0.91029	0.0028418	0.010733	-0.045284
0.82144	0.063856		0.93345	0.0065118	0.046323	0.024676
0.84214	-0.017374		0.95697	0.0080018	0.034443	0.035216
0.86315	0.017736		0.98085	0.029702	-0.0042367	-0.026874
0.88447	-0.015194		1.0051	0.00090177	0.0039833	0.0016657
0.90613	-0.014964		1.0297	0.0018418	0.039643	0.015466
0.9281	-0.0061041		1.0546	-0.025988	0.018583	0.0041457
0.9504	-0.0078441		1.08	-0.014258	0.035243	-0.0050443
0.97305	-0.020844		1.1057	0.044342	0.0094733	-0.058534
0.99603	0.011646		1.1319	-0.011098	-0.018617	-0.036634
1.0194	0.0089459		1.1584	-0.042858	0.050933	0.0029157
1.0431	0.015686		1.1853	-0.013598	-0.023997	0.022046
1.0671	-0.0081541		1.2126	-0.018038	-0.0054067	0.016616
1.0915	-0.024234		1.2403	-0.0042582	0.046553	-0.0013443
1.1163	0.0089859		1.2685	0.024012	-0.013457	-0.010704
1.1414	0.019986		1.2971	0.046572	-0.016017	0.0076457
1.1669	0.062326		1.3261	-0.029658	-0.014597	0.015766
1.1928	0.031296		1.3555	-0.012368	0.030593	0.00024569
1.2191	-0.038034		1.3854	-0.050908	0.014673	-0.0024543
1.2458	0.0029859		1.4157	0.019072	-0.0041567	0.0012257
1.273	0.024976		1.4465	-0.017888	0.0060433	-0.0073143
1.3005	0.037816		1.4778	0.064052	0.017113	0.034126
1.3284	-0.060524		1.5095	0.035162	0.036313	0.038726
1.3567	0.011136		1.5417	0.0056518	0.038433	-0.020924
1.3855	-0.00038412		1.5744	-0.0047482	0.0082433	-0.0097843
1.4147	0.010896		1.6076	0.010792	0.026563	-0.0012543
1.4444	0.084206		1.6413	-0.014308	0.023673	-0.010564
1.4745	-0.029064		1.6755	-0.031158	0.029903	-0.072234
1.505	0.016346		1.7103	0.012882	-0.0075667	-0.050254
1.536	-0.014654		1.7455	0.035242	-0.0027867	-0.031494
1.5675	0.011106		1.7813	0.0013218	0.0040433	0.0031857
1.5995	0.053116		1.8176	-0.010628	-0.0075167	0.0012557
1.6319	0.026496		1.8544	-0.012478	-0.017437	0.0098657
1.6648	0.040316		1.8919	0.0095118	-0.011307	-0.0042143
1.6983	-0.018814		1.9298	0.0093218	0.0026833	0.020876
1.7322	0.010376		1.9684	-0.012218	-0.024687	0.0064757
1.7666	-0.020224		2.0075	0.023722	0.017953	0.032196
1.8016	0.023056		2.0473	-0.0038782	-0.014197	-0.036514
1.8371	-0.0072841		2.0876	0.039802	0.013203	-0.015864
1.8731	0.0042759		2.1285	-0.044618	0.019053	0.018356
1.9097	-0.019584		2.1701	-0.0060182	-0.0083367	0.013216
1.9468	-0.011124		2.2123	-0.00022824	0.029793	0.021626
1.9845	0.0098359		2.2551	0.0035018	0.024583	0.022886
2.0227	0.0029159		2.2985	0.017242	0.025023	0.010626
2.0615	0.011776		2.3427	-0.011148	-0.023217	-0.051394
2.101	-0.019184		2.3875	0.0095418	0.030323	0.0025257
2.141	-0.010174		2.4329	0.016012	0.0052033	-0.013884
2.1816	0.0070659		2.4791	-0.029818	0.043373	-0.0018443
2.2228	0.085076		2.5259	-0.00064824	0.0026433	0.0089457
2.2647	0.0026159		2.5735	0.034832	-0.016137	0.0082557
2.3071	-0.022724		2.6217	-0.012018	0.010423	0.0082357
2.3502	0.0087059		2.6707	-0.034278	-0.0078967	0.058616
2.394	0.0087759		2.7205	-0.015648	-0.0055067	-0.015354
2.4384	-0.017254		2.771	-0.0051182	0.017673	-0.0072343
2.4835	-0.0030041		2.8222	-0.018458	0.0028633	-0.030154
2.5293	0.024256		2.8742	0.010102	-0.023487	-0.024134
2.5758	-0.0070841		2.927	-0.0032482	0.0024833	0.014756
2.623	0.025996		2.9806	-0.023928	-0.017647	-0.0058543
2.6709	0.0048559		3.035	0.0033718	0.017733	-0.0041743
2.7195	-0.018564		3.0903	-0.025248	0.0015733	0.015126
2.7688	0.019796		3.1464	0.036712	0.0099133	0.00025569
2.8189	0.020886		3.2033	0.017022	0.066483	0.010286
2.8697	-0.0020541		3.261	-0.029448	-0.026057	0.024006
2.9213	0.014526		3.3197	-0.026118	0.029083	0.020566
2.9737	-0.031814		3.3792	0.0084318	0.025273	0.015226
3.0269	-0.024784		3.4397	5.1765e-05	-0.0026967	0.0013057
3.0809	-0.027024		3.501	0.026012	-0.010987	0.012146
3.1357	-0.015844		3.5633	-0.022358	-0.0042167	0.0074057
3.1913	-0.011394		3.6265	0.013742	0.015193	0.017086
3.2478	0.019396		3.6906	-0.0094082	0.016963	-0.015204
3.3051	-0.041544		3.7558	0.0038218	0.032743	-0.0035143
3.3633	0.026726		3.8219	-0.0088782	-0.011357	0.030246
3.4223	0.011176		3.889	-0.020858	0.051683	0.056756
3.4822	-0.0074841		3.9571	-0.0016682	0.026093	-0.0034343
3.5431	0.017746		4.0262	0.015632	0.037613	0.053746
3.6049	0.0025259		4.0964	0.015782	0.012643	0.042866
3.6676	-0.024774		4.1677	0.043102	0.048963	0.069736
3.7312	0.0097859		4.24	0.0062018	0.032253	0.011586
3.7958	-0.0067841		4.3134	0.0066518	0.047543	0.027006
3.8614	0.010246		4.388	-0.0018082	0.043723	0.036466
3.928	0.0070559		4.4636	-0.011378	0.021903	0.021436
3.9956	0.0025659		4.5404	0.033252	0.017313	0.046116
4.0642	-0.011594		4.6184	-0.014638	0.0019933	0.042586
4.1338	-0.021214		4.6975	0.0072218	0.0015333	0.036666
4.2045	0.032476		4.7778	-0.034408	0.013963	0.053376
4.2762	0.023096		4.8594	0.0073518	-0.0043867	0.048556
4.3491	0.023446		4.9421	-0.018398	0.032943	0.036516
4.423	-0.0084341		5.0262	-0.026208	0.019963	0.028616
4.4981	0.020816		5.1114	-0.035398	0.060783	0.051676
4.5743	-0.033894		5.198	0.0053518	0.017113	0.050946
4.6516	-0.0033241		5.2859	-0.038028	-0.0068967	0.023256
4.7301	0.0068459		5.3751	0.029862	0.0098833	0.063786
4.8098	-0.022174		5.4656	-0.00087823	0.019153	0.050436
4.8906	0.023076		5.5575	0.0081418	0.0064333	0.030186
4.9728	-0.0072741		5.6509	0.0040518	-0.015967	0.042746
5.0561	-0.019334		5.7456	-0.0024282	0.015683	0.035626
5.1407	-0.026964		5.8417	-0.0017582	0.012693	0.023996
5.2266	0.0047459		5.9393	0.017852	0.0082533	0.028276
5.3138	-0.022034		6.0384	0.0039218	0.019193	0.035706
5.4022	0.012066		6.1389	-0.012338	0.016633	0.020156
5.4921	0.012036		6.241	-0.0069082	0.023463	0.011596
5.5833	-0.026604		6.3446	-0.0020482	0.016283	0.028976
5.6758	-0.015584		6.4498	0.0048518	0.0076033	0.024576
5.7698	0.014806		6.5566	-0.0066982	0.017473	0.037416
5.8652	-0.018424		6.6649	0.0014918	0.053573	0.042346
5.962	0.0058959		6.775	-1.8235e-05	-0.0025167	0.056236
6.0602	0.0043759		6.8866	0.0082918	0.011473	0.060676
6.16	0.0063459		7	0.0044718	0.025773	0.053586
6.2613	0.017356		7.1151	-0.026188	0.012123	0.046976
6.3641	-0.0082141		7.2319	0.013862	0.022443	0.010116
6.4684	-0.017824		7.3505	0.0089118	0.019263	0.041886
6.5743	-0.016584		7.4708	0.0016518	0.037613	0.026156
6.6818	-0.0011041		7.593	0.0050118	0.026343	0.055136
6.791	0.0098359		7.717	-0.017868	0.018183	0.057716
6.9018	-0.026674		7.8429	0.0020818	0.024633	0.053426
7.0142	0.013526		7.9707	0.0028418	-0.0065667	0.036956
7.1284	-0.0023141		8.1004	1.1765e-05	0.015783	0.044016
7.2442	0.018586		8.2321	0.0097018	0.047043	0.054546
7.3619	-0.011344		8.3658	0.015222	0.035153	0.066256
7.4813	-0.0037341		8.5014	-0.028898	0.020543	0.052306
7.6025	-0.024654		8.6392	0.0088818	0.024663	0.022456
7.7255	-0.0075041		8.779	-0.013498	0.012373	0.066356
7.8504	0.017986		8.9209	-0.0055782	0.022563	0.055386
7.9772	0.0024559		9.065	0.0038018	0.019083	0.040826
8.1059	0.0084659		9.2112	-0.0039682	0.048663	0.063146
8.2365	0.012436		9.3596	0.0073718	0.017233	0.079496
8.3691	0.0054159		9.5103	0.0049218	0.029483	0.070496
8.5037	-0.011434		9.6633	0.014732	0.059843	0.057036
8.6403	0.0063059		9.8186	0.012882	0.024963	0.069756
8.779	0.0040659		9.9762	0.0038518	0.042953	0.069266
8.9198	-0.0038141		10.136	0.028442	0.0070433	0.040016
9.0627	-0.024744		10.299	-0.019908	0.039943	0.071066
9.2078	-0.025994		10.463	0.019652	0.018533	0.074716
9.3551	-0.017594		10.631	0.030012	0.045843	0.068606
9.5045	-0.020084		10.801	-0.0010682	0.022553	0.076906
9.6563	0.0041759		10.973	0.019182	0.037333	0.066006
9.8103	0.0033859		11.148	0.019602	0.030443	0.072236
9.9667	-0.0047241		11.326	0.021772	0.036923	0.059926
10.125	-0.0061241		11.506	0.011212	0.027553	0.071316
10.286	-0.0053741		11.689	0.016442	0.047583	0.081416
10.45	0.0093059		11.875	0.014342	0.032373	0.078606
10.616	0.0091759		12.064	-0.0037282	0.052343	0.072366
10.785	0.013986		12.255	0.0058618	0.045663	0.074406
10.956	0.016626		12.45	0.036042	0.024493	0.081436
11.129	-0.0093741		12.647	0.0024418	0.031123	0.088656
11.306	0.0049859		12.847	0.0033918	0.030563	0.092796
11.484	-0.010634		13.05	0.0084818	0.039073	0.086666
11.666	0.014276		13.257	-0.0060982	0.065163	0.086476
11.85	0.017566		13.466	0.013622	0.056633	0.072946
12.038	-0.018034		13.679	0.015072	0.048953	0.083186
12.227	0.0036659		13.895	0.017912	0.034923	0.093406
12.42	0.0028459		14.114	0.012882	0.044223	0.097616
12.616	-0.018794		14.336	-0.0013682	0.043053	0.087756
12.815	0.0092259		14.562	0.015182	0.053413	0.084786
13.016	0.0027659		14.791	0.014252	0.037553	0.091906
13.221	0.017576		15.024	0.014322	0.050983	0.086416
13.429	0.0026359		15.26	0.0065318	0.060773	0.10979
13.64	-0.0012341		15.5	0.0081618	0.064943	0.10068
13.854	0.0046059		15.743	0.0028318	0.055583	0.098126
14.071	-0.0015141		15.99	0.019312	0.068913	0.093876
14.292	-0.0047741		16.241	0.015412	0.065883	0.12242
14.516	-0.017064		16.496	0.0012418	0.067543	0.11722
14.743	0.015136		16.754	-0.0068782	0.066603	0.10504
14.974	-0.0027741		17.016	0.011282	0.059693	0.099726
15.209	0.028126		17.282	0.021952	0.058803	0.10925
15.446	-0.00083412		17.553	0.015422	0.081223	0.12312
15.688	0.014096		17.827	0.0056318	0.062123	0.11532
15.933	0.010106		18.105	0.017362	0.060123	0.10388
16.182	0.012266		18.388	0.010512	0.060403	0.11966
16.434	-0.00099412		18.675	0.030872	0.071823	0.13253
16.69	0.014226		18.966	0.021112	0.067393	0.13215
16.951	-0.00064412		19.262	0.029002	0.069343	0.11418
17.215	0.0026359		19.562	0.023542	0.068833	0.15745
17.483	0.011436		19.867	0.022612	0.084883	0.12389
17.755	0.0026059		20.176	0.046932	0.091123	0.1089
18.031	-0.0028341		20.49	0.032172	0.080553	0.13312
18.312	0.0068159		20.809	0.032642	0.086673	0.11697
18.596	0.0082559		21.132	0.018442	0.096933	0.12614
18.885	0.0053659		21.46	0.024712	0.090223	0.13808
19.178	0.019526		21.794	0.024222	0.099803	0.15847
19.476	0.0064759		22.132	0.020682	0.091483	0.13678
19.778	0.0017159		22.476	0.033802	0.10935	0.15215
20.085	-0.0039341		22.824	0.040912	0.086963	0.13692
20.397	0.0079459		23.178	0.022452	0.093703	0.12416
20.713	0.016986		23.537	0.032632	0.082143	0.12965
21.034	0.013346		23.902	0.046882	0.092743	0.1414
21.359	0.019156		24.272	0.046112	0.10615	0.13646
21.69	0.017896		24.648	0.046432	0.11973	0.15212
22.026	0.010676		25.029	0.034742	0.093053	0.14021
22.366	0.0066959		25.416	0.041392	0.11807	0.1357
22.712	0.014666		25.809	0.053432	0.11928	0.14689
23.063	0.018756		26.208	0.062622	0.11177	0.15181
23.42	0.011566		26.613	0.056142	0.10901	0.14978
23.781	0.011116		27.024	0.061672	0.11529	0.15323
24.149	0.019296		27.441	0.051022	0.11823	0.15437
24.521	0.020636		27.865	0.062152	0.11882	0.14775
24.9	-0.0032941		28.295	0.056702	0.10774	0.16851
25.284	0.0055859		28.731	0.044732	0.11463	0.1623
25.674	0.017046		29.174	0.045082	0.12649	0.15496
26.069	0.026736		29.624	0.059382	0.11496	0.14294
26.471	0.025106		30.081	0.065392	0.10919	0.15803
26.879	0.012516		30.544	0.068582	0.1202	0.15902
27.293	0.0074859		31.014	0.062052	0.11448	0.1458
27.713	0.012286		31.492	0.075182	0.1269	0.15265
28.139	0.0086959		31.977	0.083782	0.12084	0.14402
28.572	0.017516		32.469	0.064262	0.12267	0.15234
29.012	0.010286		32.968	0.065372	0.12326	0.14646
29.458	0.031946		33.475	0.066582	0.12628	0.16459
29.911	0.025546		33.99	0.065192	0.12484	0.14071
30.371	0.016296		34.512	0.061762	0.1248	0.15024
30.837	0.031446		35.042	0.070102	0.12073	0.15358
31.311	0.013886		35.581	0.076392	0.12863	0.16135
31.792	0.017306		36.127	0.076982	0.13765	0.13884
32.28	0.034436		36.682	0.061712	0.13683	0.15453
32.775	0.017536		37.245	0.063552	0.14067	0.1485
33.278	0.025596		37.816	0.065982	0.13505	0.14596
33.789	0.036466		38.396	0.086852	0.13712	0.14851
34.307	0.026376		38.985	0.065782	0.12937	0.14788
34.833	0.023836		39.583	0.084012	0.14624	0.14512
35.367	0.028606		40.19	0.074902	0.13713	0.14817
35.909	0.024276		40.806	0.072732	0.13478	0.14429
36.459	0.045866		41.431	0.071452	0.13438	0.15055
37.018	0.028046		42.066	0.083612	0.13344	0.14197
37.585	0.016356		42.71	0.098642	0.12717	0.13486
38.16	0.038206		43.364	0.082392	0.13595	0.14088
38.744	0.032116		44.028	0.092782	0.14943	0.15225
39.337	0.029686		44.702	0.071272	0.11902	0.1432
39.939	0.023386		45.386	0.077342	0.13027	0.1367
40.55	0.013736		46.08	0.072702	0.13034	0.13787
41.171	0.032236		46.785	0.085572	0.12509	0.13393
41.8	0.041936		47.5	0.082792	0.12516	0.12646
42.439	0.037166		48.227	0.073692	0.12229	0.13086
43.088	0.035486		48.964	0.085342	0.12243	0.12203
43.747	0.043476		49.712	0.071702	0.12368	0.12537
44.415	0.033366		50.472	0.096082	0.12878	0.11363
45.094	0.041576		51.243	0.078342	0.12547	0.12769
45.783	0.040336		52.026	0.071692	0.11508	0.11502
46.482	0.027336		52.82	0.077412	0.11677	0.11976
47.192	0.029456		53.627	0.066192	0.11284	0.11194
47.912	0.036776		54.446	0.078262	0.1184	0.1121
48.644	0.047166		55.277	0.077432	0.11776	0.10767
49.386	0.026706		56.12	0.064772	0.11551	0.10597
50.139	0.041876		56.977	0.083132	0.11224	0.10943
50.904	0.030296		57.846	0.079592	0.10592	0.098236
51.681	0.036026		58.728	0.074062	0.10843	0.097816
52.469	0.033356		59.624	0.079122	0.10684	0.097396
53.269	0.040266		60.533	0.072632	0.11079	0.10385
54.082	0.042546		61.456	0.075582	0.10456	0.10697
54.906	0.031186		62.393	0.071632	0.1008	0.091206
55.743	0.037526		63.344	0.075942	0.103	0.075136
56.592	0.043596		64.31	0.071902	0.093743	0.094806
57.455	0.040496		65.29	0.065282	0.095373	0.073286
58.33	0.038386		66.284	0.066442	0.091103	0.074496
59.219	0.036996		67.294	0.071852	0.086243	0.076876
60.121	0.034896		68.319	0.066312	0.084843	0.075816
61.036	0.033456		69.36	0.065982	0.090253	0.064676
61.966	0.038336		70.416	0.060972	0.088463	0.073696
62.909	0.043496		71.488	0.060572	0.088163	0.064786
63.867	0.026866		72.576	0.060102	0.082863	0.057086
64.839	0.035516		73.681	0.055312	0.081213	0.069426
65.826	0.028876		74.802	0.057152	0.083513	0.055366
66.828	0.026336		75.94	0.044252	0.082403	0.065596
67.844	0.035836		77.096	0.051102	0.073333	0.063536
68.877	0.026946		78.269	0.059622	0.076683	0.052396
69.924	0.028336		79.46	0.049102	0.059343	0.049016
70.988	0.026726		80.668	0.051842	0.075493	0.053466
72.068	0.029736		81.895	0.048062	0.070333	0.044366
73.163	0.025576		83.14	0.050662	0.061873	0.040096
74.276	0.031516		84.404	0.040272	0.065793	0.036516
75.405	0.033676		85.688	0.048642	0.059043	0.035116
76.551	0.027096		86.99	0.039922	0.067863	0.040016
77.715	0.027446		88.312	0.039412	0.050613	0.029976
78.896	0.031876		89.655	0.038302	0.056543	0.021606
80.095	0.032936		91.017	0.038142	0.055473	0.026856
81.312	0.025556		92.4	0.040462	0.056273	0.036686
82.548	0.023816		93.804	0.041572	0.049083	0.026316
83.802	0.020666		95.229	0.031982	0.048213	0.025976
85.075	0.022666		96.676	0.041732	0.043363	0.019686
86.367	0.023746		98.144	0.029772	0.043653	0.021126
87.678	0.021156		99.635	0.023512	0.036093	0.012536
89.01	0.012926		101.15	0.025162	0.046413	0.025006
90.362	0.013006		102.68	0.031642	0.045283	0.0092357
91.733	0.030426		104.24	0.028322	0.041743	0.010096
93.126	0.022846		105.82	0.018182	0.037393	0.0046157
94.54	0.012136		107.43	0.028352	0.033133	0.0061157
95.975	0.020836		109.06	0.016852	0.032623	0.0026757
97.432	0.029446		110.72	0.019712	0.031573	0.0029857
98.91	0.017036		112.4	0.023102	0.029523	0.0057257
100.41	0.016366		114.1	0.024552	0.019973	0.0060657
101.93	0.015846		115.83	0.013442	0.020373	0.00013569
103.48	0.015676		117.59	0.015242	0.026273	-0.0056343
105.05	0.017356		119.38	0.015642	0.027823	-0.0014343
106.64	0.011336		121.19	0.011562	0.022653	-0.0058543
108.26	0.018346		123.03	0.016152	0.022543	-0.0083543
109.9	0.013536		124.89	0.0079518	0.021303	-0.0094943
111.57	0.012506		126.79	0.0061518	0.023243	-0.011644
113.26	0.010356		128.71	0.0091518	0.017703	-0.0092143
114.98	0.0092959		130.66	0.0067818	0.022333	-0.010044
116.72	0.014216		132.64	0.014872	0.013483	-0.016784
118.5	0.015926		134.65	0.0076118	0.015443	-0.015994
120.29	0.0088159		136.7	0.0078418	0.015693	-0.018824
122.11	0.011016		138.77	0.010872	0.017343	-0.015384
123.97	0.0055259		140.87	0.010762	0.015193	-0.021204
125.85	0.0048059		143.01	0.0025518	0.012913	-0.023454
127.75	0.0019459		145.17	0.00079176	0.015793	-0.022424
129.69	0.0072559		147.37	0.0036218	0.0056933	-0.020254
131.65	0.0029359		149.61	0.00067177	0.0094733	-0.024524
133.65	0.0068059		151.88	0.00047177	0.010893	-0.027864
135.68	0.0093959		154.18	0.0041318	0.0090133	-0.018144
137.73	0.0032059		156.51	0.0077118	0.0064933	-0.020344
139.82	0.0064259		158.88	0.0013018	0.0038833	-0.026284
141.94	0.0052859		161.29	0.0049718	0.011243	-0.026744
144.09	0.0087759		163.74	0.0046018	0.0029133	-0.020304
146.27	-0.0069741		166.21	0.0036818	0.010903	-0.027874
148.49	0.0010059		168.73	-0.0022882	0.0039033	-0.022364
150.73	-0.00094412		171.29	0.0021618	0.0030533	-0.024124
153.02	0.0083359		173.88	-0.0030082	0.0043033	-0.025834
155.34	0.0013559		176.52	-0.00093824	0.0048133	-0.027264
157.69	0.0022659		179.19	-0.00048824	0.0020633	-0.031704
160.08	0.0049459		181.9	0.0024518	-0.00036667	-0.025234
162.5	-0.0037041		184.66	-6.8235e-05	0.0041933	-0.025684
164.96	-0.0029241		187.46	-0.0030182	6.3333e-05	-0.026714
167.46	0.0046359		190.29	-0.00030824	0.0029233	-0.029704
169.99	-0.00091412		193.17	0.00049176	0.0033333	-0.029874
172.57	-0.0031541		196.1	-0.0040282	-0.00093667	-0.036254
175.18	-0.0013141		199.07	-0.0030882	-0.0021867	-0.025634
177.83	-0.0061741		202.08	-0.0036582	0.0016333	-0.028284
180.52	-0.0033641		205.14	-0.0022782	-0.0053267	-0.034504
183.26	0.00083588		208.25	0.00052176	0.0021233	-0.035084
186.03	-0.0017041		211.4	-0.010138	0.0010333	-0.029804
188.85	0.00078588		214.6	-0.0064882	0.00016333	-0.028154
191.7	-0.0055741		217.85	-0.0083982	-0.00061667	-0.041524
194.61	-0.0048141		221.14	-0.011388	0.00095333	-0.035224
197.55	-0.0077241		224.49	-0.0063082	-0.00082667	-0.037954
200.54	-0.0021541		227.89	-0.0069182	-0.0020467	-0.040114
203.57	-0.0033141		231.34	-0.0050182	-0.0068667	-0.036974
206.66	0.00070588		234.84	-0.0055582	-0.0056067	-0.035964
209.78	-0.00048412		238.39	-0.0086982	-0.0029267	-0.031724
212.96	-0.0045441		242	-0.0071982	-0.0055667	-0.034564
216.18	-0.0079141		245.66	-0.0049182	-0.0082267	-0.037944
220	-0.0038841		250	-0.010508	-0.0065067	-0.037034
