# Supplementary material for: Single turnover transient state kinetics reveals processive protein unfolding catalyzed by Escherichia coli ClpB
Source: eLife. 2024 Oct 7;13:RP99052. doi: 10.7554/eLife.99052 (PMC11458177; doi:10.7554/eLife.99052)
Supplement: Figure 2—figure supplement 1—source data 1. [file elife-99052-fig2-figsupp1-data1.xlsx]

## Sheet: Supp Figure 3 B
	RepA-Titin1			RepA-Titin 2			RepA-Titin 3
time (s)	Relative fluorescence enhancement	Standard deviation	time (s)	Relative fluorescence enhancement	Standard deviation	time (s)	Relative fluorescence enhancement	Standard deviation
0.37729	-0.028688	0.022353	0.41501	-0.027986	0.0065291	0.49047	-0.028548	0.0058541
0.76026	-0.017286	0.0043614	0.83629	-0.021489	0.0011187	0.98834	-0.02585	0.0172
1.149	0.0048088	0.016125	1.2639	-0.020837	0.0079195	1.4937	-0.031093	0.013962
1.5437	-0.023643	0.045376	1.698	-0.020672	0.012224	2.0067	-0.014237	0.0053722
1.9442	-0.021623	0.014565	2.1386	-0.02527	0.0053023	2.5275	-0.01412	0.0068884
2.3509	0.012735	0.0099421	2.5859	-0.012528	0.0025275	3.0561	-0.014583	0.017556
2.7636	0.01983	0.01312	3.04	-0.015369	0.0039097	3.5927	-0.014778	0.010968
3.1826	-0.041779	0.042303	3.5009	-0.0066126	0.013148	4.1374	-0.0031816	0.010776
3.6079	-0.012678	0.034108	3.9687	-0.0032551	0.0092435	4.6903	-0.00084609	0.0018832
4.0397	-0.027896	0.0045749	4.4436	-0.010416	0.0087347	5.2516	-0.010023	0.010873
4.4779	-0.015669	0.0073168	4.9257	-0.0013042	0.013651	5.8213	-0.0018767	0.010981
4.9228	-0.030013	0.0073664	5.4151	-0.0053702	0.0042375	6.3996	-0.003188	0.0086758
5.3744	0.0065615	0.020109	5.9118	-0.00092954	0.0061328	6.9866	-0.0089483	0.0080426
5.8327	0.0084251	0.085207	6.416	-0.00074555	0.0057751	7.5826	0.0029441	0.010234
6.298	0.0061976	0.013156	6.9278	0.0017365	0.0085382	8.1875	-0.0064482	0.0047089
6.7704	-0.0096942	0.028634	7.4474	-0.0018176	0.011408	8.8015	0.0020806	0.012459
7.2498	-0.039282	0.0051724	7.9748	-0.010286	0.0043794	9.4248	-0.0019181	0.013023
7.7365	-0.014504	0.0054531	8.5102	3.2864e-05	0.0093914	10.057	-0.002566	0.0024173
8.2306	-0.017065	0.0063632	9.0536	-0.0034719	0.011616	10.7	-0.0032844	0.013877
8.7321	-0.019561	0.0097262	9.6053	-0.0028286	0.0087061	11.352	0.0003083	0.0065408
9.2411	-0.013553	0.0045396	10.165	-0.00057657	0.011685	12.014	-0.0064241	0.002722
9.7579	-0.032358	0.021009	10.734	-0.0053391	0.0099848	12.685	0.0038417	0.01002
10.282	-0.04691	0.011216	11.311	0.0022943	0.0097627	13.367	0.0091822	0.011183
10.815	-0.0071223	0.0002556	11.896	0.0022254	0.006563	14.059	-0.0019782	0.013849
11.355	0.038573	0.0049239	12.491	-0.0015948	0.01172	14.762	-0.0010249	0.00303
11.904	0.010022	0.0025917	13.094	-0.0016661	0.0064718	15.475	-0.00062488	0.0035927
12.461	-0.018466	0.016373	13.707	0.0029608	0.0052055	16.199	-0.0056794	0.0095616
13.026	-0.015661	0.026979	14.329	0.0010062	0.010502	16.934	-0.0012524	0.0080683
13.6	-0.014228	0.011883	14.96	-0.00057597	0.0036228	17.68	0.0033857	0.0095429
14.183	0.003592	0.0090087	15.601	-0.0020574	0.010775	18.438	0.0048355	0.0087414
14.774	-0.0032443	0.0037926	16.251	0.0010141	0.0049368	19.206	-0.0023599	0.0072554
15.374	0.0077958	0.019118	16.912	0.005407	0.0091417	19.987	0.0093713	0.0049441
15.984	-0.027161	0.043745	17.582	0.001926	0.0066474	20.779	-0.0011996	0.0035846
16.602	0.0081919	0.011628	18.262	0.0032318	0.0056797	21.583	-0.0015352	0.0076304
17.23	0.012403	0.046385	18.953	0.0013752	0.0072809	22.399	-0.0049021	0.0036789
17.867	-0.011657	0.0048198	19.654	-0.00027603	0.0024095	23.227	0.003046	0.009123
18.514	0.0068037	0.015602	20.366	0.0041215	0.0057866	24.068	0.0082073	0.010089
19.171	0.019606	0.013203	21.088	0.006176	0.0025937	24.922	0.0036579	0.0098252
19.837	0.027297	0.027692	21.821	0.008824	0.0066138	25.789	0.0010438	0.011145
20.514	0.022838	0.003409	22.566	0.0080316	0.0040521	26.668	0.0065225	0.0094168
21.201	0.0018808	0.014272	23.321	0.0036977	0.0063221	27.561	0.0043024	0.0082988
21.898	-0.0074287	0.01663	24.088	0.0077407	0.0085664	28.468	0.0064206	0.0085437
22.606	0.0072117	0.0072345	24.867	0.0034857	0.0042611	29.388	0.0042228	0.0087872
23.324	0.0059898	0.025154	25.657	0.0030902	0.0071705	30.322	0.0053406	0.0060397
24.054	0.0019504	0.037419	26.459	0.0076376	0.0049032	31.27	0.0097243	0.014943
24.794	-0.0019044	0.017033	27.273	0.0012213	0.0068064	32.232	0.004328	0.0088044
25.545	0.0098497	0.006196	28.1	0.0035996	0.0067309	33.209	0.001042	0.0036835
26.308	-0.0053378	0.044632	28.939	0.0059671	0.0048994	34.201	0.0098845	0.0065221
27.083	0.012204	0.0076166	29.791	0.0025901	0.0035899	35.207	0.0099904	0.0036785
27.869	0.0073778	0.040496	30.655	0.0071477	0.0070336	36.229	0.011549	0.010423
28.666	0.025212	9.113e-05	31.533	0.0054013	0.0046305	37.266	0.0034727	0.007672
29.476	0.01663	0.018795	32.424	0.0034806	0.0044025	38.319	0.0034417	0.011244
30.299	0.024826	0.0045475	33.328	0.0035405	0.0064442	39.388	0.0099338	0.0061932
31.133	-0.0028899	0.034337	34.246	0.0061928	0.0048694	40.473	0.0011957	0.0083779
31.98	0.0081295	8.4039e-05	35.178	0.006817	0.0040149	41.574	0.0043864	0.010093
32.84	0.011957	0.0030316	36.124	0.0054927	0.0059645	42.692	0.0071445	0.011012
33.713	-0.0062625	0.01577	37.084	-0.00049109	0.0073635	43.827	0.0088833	0.0068541
34.599	-0.0033245	0.029744	38.059	0.00078759	0.0044512	44.979	0.0047411	0.0071016
35.498	-0.0068285	0.0034304	39.048	0.0070351	0.0066853	46.148	0.0045453	0.0052882
36.411	0.033921	0.0086304	40.053	0.003237	0.0058122	47.335	0.0091481	0.011989
37.338	0.01944	0.015696	41.072	0.0060703	0.0079114	48.54	0.011667	0.011241
38.279	0.01772	0.0014878	42.107	0.012132	0.0076139	49.763	0.013175	0.0096001
39.234	-0.0035214	0.013884	43.157	0.0049628	0.0060611	51.004	0.0055039	0.0092046
40.203	0.027626	0.012481	44.224	0.0074393	0.010447	52.264	0.0055735	0.0074031
41.187	0.0085422	0.010702	45.306	0.0055653	0.0048768	53.543	0.0060091	0.0049333
42.186	0.01902	0.010938	46.405	0.0064884	0.0049906	54.842	0.0066177	0.0070689
43.2	0.015821	0.0028499	47.52	0.0065484	0.0039347	56.16	0.013068	0.0065301
44.229	0.029313	0.0013609	48.652	0.0044151	0.0039559	57.498	0.0087705	0.0052584
45.274	0.015735	0.018427	49.801	0.0057708	0.008396	58.856	0.0087986	0.011242
46.335	0.0010747	0.013938	50.968	0.0058485	0.0018055	60.235	0.013009	0.0042602
47.411	0.016682	0.037071	52.152	0.0017863	0.0025023	61.634	0.0080104	0.0035947
48.504	0.0030478	0.018903	53.354	0.0069809	0.0098598	63.055	0.007184	0.0070134
49.613	-0.013248	0.013083	54.575	0.0053721	0.0029037	64.497	0.0096535	0.010647
50.739	0.0036478	0.02072	55.813	0.0077595	0.0041917	65.961	0.011873	0.0088635
51.882	0.010711	0.008306	57.07	0.0057994	0.0040285	67.447	0.014962	0.0084212
53.042	0.0070794	0.010473	58.347	0.001633	0.0072356	68.955	0.0059827	0.0089192
54.22	0.018468	0.0087922	59.642	0.0077867	0.0064723	70.486	0.012585	0.010398
55.416	0.017479	0.028504	60.958	0.0043761	0.0040565	72.041	0.011664	0.0096882
56.63	0.020249	0.00024918	62.292	0.0064843	0.0040344	73.618	0.011503	0.00738
57.861	0.028914	0.0052283	63.647	0.0093529	0.0065355	75.22	0.012579	0.0083006
59.112	-0.0055902	0.016559	65.023	0.0047896	0.0039721	76.845	0.0083661	0.0088533
60.381	-0.00066975	0.016624	66.419	0.0083698	0.0020753	78.496	0.0089024	0.01164
61.67	0.016414	0.014791	67.837	0.00472	0.0017869	80.171	0.013913	0.010052
62.978	0.011531	0.0083169	69.275	0.0038402	0.0055841	81.871	0.0088111	0.0063764
64.305	0.013971	0.018463	70.736	0.0071339	0.0028471	83.597	0.014609	0.0066873
65.653	0.0094598	0.0084033	72.218	0.0086899	0.0043385	85.349	0.0064828	0.0088931
67.021	0.0047138	0.013108	73.723	0.0048344	0.0033201	87.128	0.010061	0.012288
68.41	0.010856	0.0067832	75.251	0.0073624	0.0085948	88.933	0.0088998	0.0066665
69.82	0.012461	0.0083396	76.802	0.0042398	0.0053059	90.766	0.011627	0.0078797
71.251	0.015679	0.013321	78.376	0.0079126	0.0029215	92.626	0.0074914	0.0071019
72.703	0.022035	0.010217	79.974	0.0051346	0.0053318	94.514	0.0085813	0.009552
74.178	0.019331	0.0051382	81.595	0.0053474	0.0026436	96.431	0.012644	0.012012
75.674	0.022315	0.0055127	83.242	0.0073684	0.0020184	98.377	0.016071	0.011022
77.194	0.007338	0.0051525	84.913	0.0057781	0.003427	100.35	0.015629	0.0159
78.736	0.012757	0.015364	86.609	0.0054914	0.0075688	102.36	0.012636	0.010582
80.301	0.022828	0.025872	88.332	0.0091924	0.0056283	104.39	0.013275	0.007551
81.891	0.022549	0.0059472	90.08	0.0049379	0.0037833	106.46	0.0083981	0.013686
83.504	0.0085814	0.019119	91.854	0.0079027	0.002181	108.56	0.014744	0.0099466
85.141	0.012703	0.039271	93.655	0.0037078	0.0019208	110.68	0.01296	0.01104
86.803	0.0093034	0.011277	95.484	0.0065364	0.0025511	112.84	0.016188	0.008688
88.491	0.015978	0.0092198	97.34	0.0077204	0.0045797	115.04	0.01412	0.015505
90.203	0.022685	0.024234	99.224	0.0083256	0.007063	117.26	0.011159	0.012311
91.942	0.022917	0.011279	101.14	0.0038266	0.0019894	119.53	0.0087792	0.015034
93.707	0.0060458	0.0058729	103.08	0.0075681	0.0032093	121.82	0.01875	0.016713
95.498	0.0092068	0.020468	105.05	0.0080168	0.0056982	124.15	0.017709	0.012938
97.317	0.010587	0.0092458	107.05	0.0082521	0.0060352	126.51	0.013531	0.019217
99.163	0.017257	0.021857	109.08	0.0062354	0.0049847	128.91	0.011517	0.015523
101.04	0.0077763	0.0035093	111.14	0.0057574	0.002215	131.35	0.019386	0.022757
102.94	0.0081056	0.010653	113.23	0.0092803	0.0027391	133.82	0.015885	0.016186
104.87	0.01251	0.0024332	115.36	0.0097379	0.0034401	136.33	0.014089	0.014641
106.83	0.029007	0.012635	117.51	0.0077326	0.0040904	138.88	0.017191	0.014163
108.82	0.019454	0.013418	119.7	0.0049909	0.011114	141.46	0.015664	0.015385
110.84	0.012925	0.0098575	121.92	0.0075086	0.0042174	144.09	0.015954	0.014954
112.89	0.023401	0.0046233	124.18	0.0094181	0.0067464	146.76	0.014375	0.0127
114.97	0.019479	0.013382	126.47	0.0076376	0.0023891	149.46	0.013624	0.016095
117.08	0.011779	0.0084224	128.79	0.0057927	0.0063397	152.21	0.016331	0.015928
119.23	0.027891	0.025272	131.15	0.0083054	0.0047818	154.99	0.016081	0.02032
121.4	0.0086051	0.0034324	133.54	0.0091653	0.00367	157.82	0.018024	0.017987
123.61	0.0075299	0.014287	135.97	0.0056957	0.0048767	160.7	0.019403	0.020944
125.85	0.01631	0.001368	138.44	0.0064432	0.0044714	163.61	0.020389	0.018829
128.13	0.012651	0.0083214	140.94	0.0065168	0.0055119	166.57	0.014913	0.022311
130.44	0.0034256	0.00171	143.49	0.0070122	0.0064193	169.57	0.019785	0.023504
132.79	0.016666	0.0042331	146.07	0.0081986	0.003243	172.62	0.016147	0.02236
135.17	0.014462	0.007284	148.69	0.007097	0.0037086	175.72	0.019521	0.022654
137.59	0.015021	0.015684	151.35	0.0085433	0.0025683	178.86	0.019858	0.027995
140.04	0.0022469	0.0028025	154.04	0.0075748	0.0016729	182.05	0.023464	0.030687
142.53	0.017571	0.0027852	156.78	0.0050385	0.0037235	185.29	0.025398	0.030703
145.06	0.011753	0.01449	159.57	0.008997	0.0051961	188.58	0.026331	0.035179
147.62	0.019718	0.010704	162.39	0.0076992	0.0048123	191.91	0.02619	0.036566
150.23	0.020672	0.00051277	165.25	0.0085436	0.0029431	195.3	0.025458	0.03628
152.88	0.006314	0.016582	168.16	0.0069067	0.0063802	198.74	0.022943	0.035506
155.56	0.015675	0.013746	171.12	0.0094666	0.0086619	202.23	0.025663	0.028563
158.28	0.0036415	0.0043397	174.11	0.0091053	0.0050087	205.77	0.02671	0.0332
161.05	0.010231	0.00063078	177.15	0.0094341	0.0031802	209.37	0.02722	0.029429
163.86	0.014487	0.0063156	180.24	0.0074276	0.0062798	213.01	0.025174	0.027969
166.71	0.019059	0.0091851	183.38	0.008515	0.0068331	216.72	0.02359	0.029171
169.6	0.0024551	0.0020874	186.56	0.0087903	0.0028842	220.48	0.024203	0.028386
172.54	0.015193	0.013	189.79	0.0064031	0.0045771	224.3	0.024307	0.02505
175.52	0.0052756	0.00069084	193.07	0.0071634	0.0038155	228.18	0.0222	0.02531
178.54	0.010033	0.018045	196.4	0.0064519	0.0052568	232.11	0.019293	0.024149
181.62	0.020769	0.006374	199.78	0.0065211	0.0008047	236.1	0.021658	0.019977
184.74	0.02156	0.025156	203.21	0.0067325	0.0049374	240.16	0.023182	0.025242
187.9	0.018584	0.0017416	206.69	0.0082129	0.0046022	244.27	0.024415	0.02513
191.11	0.026319	0.00013747	210.23	0.007616	0.0016698	248.45	0.024484	0.023137
194.38	0.016697	0.0073657	213.81	0.0071646	0.0022059	252.69	0.023883	0.0274
197.68	0.012468	0.015418	217.45	0.0090669	0.0048245	256.99	0.022748	0.022856
201.05	0.021334	0.0039571	221.15	0.0052456	0.004613	261.36	0.025669	0.018238
204.46	0.018211	4.3285e-05	224.9	0.0066692	0.0040283	265.8	0.025885	0.021887
207.92	0.024851	0.0045834	228.71	0.007614	0.0044565	270.3	0.027783	0.02384
211.43	0.013705	0.0061292	232.58	0.0061892	0.0021095	274.87	0.023814	0.024192
215	0.0092002	0.0020164	236.5	0.0095298	0.0061305	279.51	0.023523	0.021838
218.63	0.015077	0.0029685	240.49	0.0098422	0.0059744	284.21	0.026391	0.023354
222.3	0.010553	0.027677	244.53	0.0058702	0.0039984	288.99	0.024562	0.020753
226.03	0.0078304	0.0081901	248.64	0.0030377	0.0043465	293.85	0.025106	0.020584
229.82	0.015978	0.0087177	252.8	0.0079836	0.0046571	298.77	0.022675	0.019485
233.67	0.012348	0.0059661	257.04	0.0051968	0.0037664	303.77	0.023584	0.019281
237.57	0.015023	0.0011206	261.33	0.0043852	0.0040893	308.84	0.024114	0.021024
241.54	0.023626	0.0071833	265.69	0.006468	0.0036615	313.99	0.023315	0.021008
245.56	0.0018791	0.015745	270.11	0.0059407	0.0020116	319.22	0.025248	0.016814
249.64	0.022443	0.00041156	274.6	0.0077884	0.0026908	324.53	0.02052	0.021767
253.79	0.020205	0.004117	279.16	0.01002	0.0026116	329.92	0.024196	0.019653
257.99	0.010781	0.001576	283.79	0.0065405	0.0039326	335.39	0.022891	0.023406
262.26	0.020259	0.017213	288.49	0.0087008	0.0062547	340.94	0.0229	0.020469
266.6	0.019223	0.0020592	293.26	0.0061361	0.0032343	346.58	0.024723	0.022387
271	0.025995	0.004502	298.1	0.0098512	0.0056578	352.3	0.021528	0.019918
275.47	0.016791	4.1447e-05	303.01	0.0055803	0.0053499	358.11	0.0263	0.021653
280	0.034838	0.0022349	308	0.0072193	0.003549	364	0.02173	0.022301
284.6	0.029352	0.016143	313.06	0.0045203	0.0037451	369.98	0.024397	0.023872
289.27	0.034454	0.0043297	318.2	0.0096036	0.0043657	376.06	0.023657	0.021781
294.02	0.031164	0.011741	323.42	0.0087289	0.0018758	382.22	0.024953	0.022185
298.83	0.022989	0.0016158	328.72	0.011353	0.0020895	388.48	0.022848	0.023486
303.72	0.029044	0.021596	334.09	0.0040894	0.0022418	394.84	0.025236	0.021238
308.68	0.030064	0.001424	339.55	0.0070224	0.0027704	401.29	0.027314	0.019533
313.72	0.027785	0.0083258	345.09	0.0069811	0.0030341	407.83	0.027385	0.019824
318.83	0.022265	0.0062645	350.71	0.0089689	0.0026568	414.48	0.024428	0.020937
324.02	0.029457	0.010476	356.42	0.0076363	0.0049988	421.22	0.025363	0.022851
329.28	0.023619	0.0076904	362.21	0.0077462	0.0052579	428.07	0.026618	0.021298
334.63	0.02194	0.00080137	368.09	0.005678	0.0024184	435.02	0.028291	0.021068
340.06	0.028981	0.0082226	374.06	0.005401	0.0032573	442.08	0.025825	0.022821
345.57	0.027588	0.0061798	380.12	0.0062662	0.0045855	449.24	0.027677	0.021284
351.16	0.025491	0.0052978	386.28	0.0075689	0.0040638	456.51	0.027412	0.021198
356.84	0.028029	0.0032141	392.52	0.0085517	0.003746	463.89	0.025698	0.022391
362.6	0.028336	0.0063762	398.86	0.0083432	0.0023266	471.38	0.024897	0.023095
368.45	0.025009	0.0062276	405.29	0.0075137	0.0011138	478.98	0.027308	0.02272
374.39	0.020895	0.0010951	411.83	0.0058264	0.0031673	486.7	0.026127	0.022713
380.41	0.020006	0.0037521	418.45	0.0079425	0.0045886	494.54	0.027229	0.022853
386.53	0.016191	0.012681	425.18	0.0064949	0.0036097	502.49	0.026514	0.025815
392.74	0.033017	0.0096222	432.02	0.010041	0.0016827	510.57	0.028004	0.024557
399.05	0.030017	0.0081794	438.95	0.0068965	0.0029648	518.76	0.024873	0.024168
405.45	0.022422	0.0061267	445.99	0.0055848	0.0020382	527.08	0.027163	0.024062
411.94	0.021164	0.002546	453.14	0.0072858	0.0037048	535.52	0.026618	0.025587
418.54	0.020395	0.0034751	460.39	0.007935	0.0037553	544.1	0.02536	0.024305
425.23	0.028915	0.013083	467.75	0.0098774	0.0048517	552.8	0.025461	0.02696
432.02	0.020799	0.018623	475.23	0.0089293	0.0047821	561.63	0.028248	0.024894
438.92	0.019855	0.0010606	482.81	0.0059051	0.0059728	570.6	0.02832	0.025219
445.92	0.018469	0.0059262	490.52	0.0091189	0.0058018	579.7	0.026905	0.02475
453.03	0.026292	0.01002	498.33	0.007559	0.0034873	588.94	0.029108	0.025298
460.24	0.022181	0.0062167	506.27	0.0080713	0.0042308	598.32	0.026753	0.024681
467.57	0.020129	0.0015923	514.32	0.0070083	0.0037954	607.84	0.028232	0.026788
475	0.026206	0.01198	522.5	0.0082059	0.0045817	617.5	0.027005	0.026212
482.55	0.021867	0.0018949	530.8	0.0082711	0.0030469	627.31	0.026797	0.024377
490.2	0.031586	0.0058296	539.23	0.0079071	0.0042513	637.27	0.026328	0.025142
497.98	0.012111	0.0052962	547.78	0.0086399	0.0045709	647.37	0.027641	0.025669
505.87	0.026034	0.010521	556.46	0.0083208	0.005041	657.64	0.028228	0.027747
513.89	0.026237	0.0034077	565.27	0.0079844	0.0033085	668.05	0.026602	0.027558
522.02	0.011909	0.0065155	574.22	0.007731	0.0040367	678.62	0.027444	0.026686
530.27	0.030854	0.00089088	583.3	0.0099323	0.0037169	689.35	0.028517	0.031276
538.65	0.027271	0.0078386	592.52	0.0083765	0.0033974	700.25	0.031969	0.035364
547.16	0.03001	0.00059062	601.87	0.009791	0.0039768	711.31	0.027284	0.028914
555.79	0.030483	0.0070298	611.37	0.0065239	0.0045519	722.53	0.028755	0.027137
564.56	0.035746	8.9896e-05	621.01	0.0064172	0.0052476	733.93	0.027659	0.025465
573.46	0.034549	0.0015198	630.8	0.0092148	0.0028655	745.49	0.026888	0.026753
582.49	0.031021	0.015316	640.74	0.0082968	0.0053061	757.23	0.029479	0.027208
591.66	0.030536	0.0040108	650.82	0.0085366	0.00515	769.15	0.02949	0.026007
600.96	0.033101	0.0081391	661.06	0.0085143	0.0053847	781.25	0.029058	0.027226
610.41	0.038771	0.01089	671.45	0.0093648	0.0058699	793.53	0.029471	0.027699
620	0.034411	0.0015468	682	0.0090904	0.0039982	806	0.028479	0.026658
629.73	0.028214	0.015193	692.7	0.011685	0.0050996	818.65	0.029845	0.027269
639.61	0.038619	0.010173	703.57	0.01082	0.0046341	831.49	0.029017	0.024022
649.64	0.037709	0.015911	714.61	0.0098538	0.0045317	844.53	0.027588	0.024778
659.82	0.03948	0.0083805	725.8	0.010519	0.0072871	857.77	0.028443	0.025112
670.16	0.041035	0.0084064	737.17	0.0092552	0.0060031	871.21	0.029152	0.025493
680.65	0.044781	0.0083515	748.71	0.0088411	0.0035377	884.84	0.029117	0.026329
691.3	0.040808	0.016196	760.43	0.0096149	0.0056079	898.69	0.029596	0.026675
702.11	0.043752	0.02546	772.32	0.0095733	0.00423	912.74	0.029178	0.02564
713.08	0.048001	0.026201	784.39	0.010831	0.0031292	927.01	0.028208	0.026366
724.22	0.050837	0.02578	796.64	0.010562	0.0031807	941.48	0.032996	0.024166
735.53	0.054786	0.014809	809.08	0.01215	0.0027403	956.18	0.031088	0.025882
747	0.050779	0.020764	821.7	0.011554	0.0028638	971.1	0.030721	0.025852
758.65	0.053381	0.011985	834.52	0.010977	0.0032615	986.25	0.029802	0.025942
770.48	0.054599	0.019812	847.53	0.01132	0.0053932	1001.6	0.031276	0.024266
782.49	0.051663	0.0088865	860.73	0.010796	0.0031439	1017.2	0.029616	0.023939
794.67	0.050595	0.010972	874.14	0.012053	0.004153	1033.1	0.02949	0.025002
807.04	0.060537	0.0038763	887.75	0.012781	0.0033851	1049.2	0.030968	0.026669
819.6	0.058636	0.0062053	901.56	0.01326	0.0038133	1065.5	0.031431	0.024979
832.34	0.060701	0.015564	915.58	0.011197	0.0027112	1082.1	0.033153	0.026679
845.28	0.064774	0.012461	929.81	0.013814	0.004044	1098.9	0.032512	0.025177
858.42	0.070645	0.0048758	944.26	0.01198	0.0042449	1115.9	0.0338	0.027207
871.75	0.074769	0.0084501	958.92	0.013383	0.0041449	1133.3	0.030251	0.025389
885.28	0.076716	0.0064391	973.81	0.013885	0.0046291	1150.9	0.030454	0.025977
899.02	0.080819	0.010736	988.92	0.014143	0.0037723	1168.7	0.032545	0.026038
912.96	0.081664	0.0036526	1004.3	0.014575	0.0044748	1186.8	0.032165	0.023783
927.12	0.084435	0.0059817	1019.8	0.01325	0.0041933	1205.3	0.030536	0.025965
941.49	0.090156	0.0027011	1035.6	0.015971	0.0043559	1223.9	0.03124	0.02761
956.07	0.090088	0.014143	1051.7	0.014383	0.00090895	1242.9	0.032932	0.025528
970.88	0.098404	0.010352	1068	0.015487	0.0027244	1262.1	0.033275	0.024739
985.91	0.098789	0.0042068	1084.5	0.016502	0.0035958	1281.7	0.032932	0.026388
1001.2	0.10454	0.0060615	1101.3	0.016881	0.0029136	1301.5	0.034018	0.027181
1016.7	0.1111	0.0089096	1118.3	0.016841	0.0033426	1321.7	0.032859	0.026843
1032.4	0.11843	0.017432	1135.6	0.019991	0.0025898	1342.1	0.033975	0.025751
1048.3	0.11937	0.0079818	1153.2	0.020233	0.0036916	1362.8	0.032391	0.028281
1064.5	0.12339	0.0064685	1171	0.020575	0.0039753	1383.9	0.032767	0.028222
1081	0.12469	0.0062131	1189.1	0.021206	0.0033043	1405.3	0.033776	0.026559
1097.7	0.12714	0.01244	1207.4	0.022216	0.0033425	1427	0.033907	0.027335
1114.6	0.13561	0.006855	1226.1	0.023577	0.0039859	1449	0.035676	0.026977
1131.8	0.13281	0.0049921	1245	0.024972	0.0031724	1471.3	0.034518	0.026189
1149.3	0.1433	0.0025128	1264.2	0.025666	0.002867	1494	0.034709	0.027484
1167	0.15068	0.010527	1283.7	0.026236	0.0036961	1517.1	0.03383	0.026991
1185	0.15641	0.0029184	1303.5	0.027678	0.0021202	1540.5	0.034801	0.026121
1203.2	0.16608	0.0065537	1323.6	0.030348	0.0023487	1564.2	0.034256	0.029326
1221.8	0.16452	0.0070299	1343.9	0.031182	0.0021503	1588.3	0.036446	0.027834
1240.6	0.17504	0.011539	1364.6	0.034273	0.0025516	1612.8	0.036337	0.02693
1259.7	0.18443	0.002572	1385.7	0.035273	0.0026433	1637.6	0.036045	0.029045
1279.1	0.19258	0.0070662	1407	0.037578	0.0025731	1662.8	0.036174	0.028522
1298.8	0.197	0.015746	1428.6	0.039398	0.0039305	1688.4	0.037335	0.02978
1318.7	0.21115	0.02087	1450.6	0.042261	0.0027933	1714.3	0.038006	0.028265
1339	0.20908	0.013096	1472.9	0.044626	0.0020489	1740.7	0.037017	0.0282
1359.6	0.22108	0.0073243	1495.6	0.048437	0.0015629	1767.5	0.037937	0.027162
1380.5	0.23081	0.0072054	1518.5	0.050905	0.0018937	1794.6	0.038573	0.027655
1401.7	0.24256	0.007101	1541.9	0.053181	0.0018306	1822.2	0.040778	0.028353
1423.2	0.24547	0.0094542	1565.6	0.055329	0.00081222	1850.2	0.039259	0.027526
1445.1	0.25928	0.0096694	1589.6	0.058168	0.0016472	1878.6	0.04119	0.029145
1467.3	0.26537	0.015351	1614	0.0635	0.0017712	1907.4	0.040592	0.027455
1489.8	0.27703	0.01796	1638.8	0.067143	0.0013891	1936.7	0.041486	0.025799
1512.7	0.29373	0.019757	1663.9	0.072118	0.00049196	1966.4	0.044458	0.027599
1535.8	0.29649	0.018649	1689.4	0.076641	0.00086	1996.6	0.046251	0.02846
1559.4	0.30751	0.017503	1715.3	0.082592	0.0023971	2027.2	0.047422	0.02628
1583.3	0.31927	0.012646	1741.7	0.088192	0.0024137	2058.3	0.048419	0.027761
1607.6	0.32905	0.010668	1768.3	0.092925	0.0014994	2089.9	0.050839	0.029198
1632.2	0.33881	0.0093479	1795.4	0.10011	0.00093253	2121.9	0.051153	0.02687
1657.2	0.35185	0.0081392	1823	0.10716	0.0013353	2154.4	0.054142	0.028109
1682.6	0.36283	0.015961	1850.9	0.11276	0.00050912	2187.4	0.056181	0.026578
1708.4	0.37219	0.01507	1879.2	0.12049	0.001336	2220.9	0.058952	0.026586
1734.6	0.38118	0.011902	1908	0.12832	0.0023865	2254.9	0.062565	0.026545
1761.1	0.39864	0.0088275	1937.2	0.13589	0.0029923	2289.4	0.06729	0.025067
1788.1	0.40407	0.016511	1966.9	0.14585	0.00086081	2324.5	0.069564	0.026428
1815.4	0.41809	0.016433	1997	0.1553	0.0012854	2360.1	0.072764	0.025319
1843.2	0.43354	0.011103	2027.5	0.16621	0.0018021	2396.2	0.078818	0.028157
1871.4	0.44307	0.02016	2058.5	0.17641	0.0028856	2432.8	0.083898	0.028872
1900	0.45928	0.02201	2090	0.18738	0.0024578	2470	0.089065	0.027926
1929.1	0.46467	0.023362	2122	0.20077	0.0020161	2507.8	0.09647	0.027379
1958.6	0.47898	0.02252	2154.4	0.21298	0.0039735	2546.1	0.10211	0.028786
1988.5	0.49673	0.022041	2187.3	0.22664	0.0038004	2585	0.1087	0.027069
2018.9	0.50476	0.024036	2220.8	0.24192	0.0038828	2624.5	0.11582	0.027244
2049.7	0.52125	0.014576	2254.7	0.25414	0.0029393	2664.6	0.12546	0.027924
2081	0.53208	0.027628	2289.1	0.26911	0.0042508	2705.3	0.13353	0.028722
2112.8	0.54645	0.030564	2324.1	0.28398	0.0038295	2746.7	0.14386	0.02735
2145.1	0.55078	0.034504	2359.6	0.29905	0.0044902	2788.6	0.15426	0.027356
2177.8	0.56572	0.026369	2395.6	0.31607	0.0047469	2831.2	0.1664	0.027117
2211.1	0.58059	0.029251	2432.2	0.33259	0.0036848	2874.4	0.17874	0.026844
2244.8	0.58707	0.031567	2469.3	0.34931	0.004369	2918.3	0.19292	0.027814
2279.1	0.60386	0.028217	2507	0.36613	0.0046067	2962.8	0.2058	0.029935
2313.8	0.61617	0.026972	2545.2	0.38481	0.0052164	3008	0.2191	0.028067
2349.1	0.63004	0.028532	2584.1	0.40282	0.005652	3053.9	0.23539	0.027418
2385	0.6392	0.032029	2623.5	0.42081	0.0067311	3100.4	0.25176	0.030316
2421.3	0.65724	0.024024	2663.5	0.44004	0.0053252	3147.7	0.26877	0.029408
2458.2	0.6654	0.02535	2704.1	0.45976	0.0066859	3195.7	0.28647	0.028279
2495.7	0.67534	0.025787	2745.3	0.47772	0.0055235	3244.4	0.3062	0.028263
2533.8	0.68411	0.032919	2787.1	0.49606	0.0052303	3293.9	0.3247	0.027875
2572.4	0.70032	0.028665	2829.6	0.5159	0.006517	3344.1	0.34495	0.028743
2611.6	0.70937	0.029006	2872.7	0.53524	0.0059638	3395.1	0.36616	0.029167
2651.4	0.72074	0.025852	2916.5	0.55227	0.0067753	3446.8	0.38558	0.028602
2691.8	0.73674	0.028419	2960.9	0.57196	0.0070285	3499.3	0.40795	0.029733
2732.8	0.74317	0.027728	3006	0.58974	0.0073867	3552.6	0.42859	0.027211
2774.4	0.75655	0.020805	3051.8	0.6095	0.0075604	3606.7	0.45112	0.02832
2816.6	0.76129	0.025008	3098.3	0.62632	0.0094899	3661.6	0.47313	0.02809
2859.5	0.77494	0.017553	3145.5	0.64524	0.0094827	3717.4	0.49477	0.026965
2903	0.78392	0.024314	3193.4	0.66333	0.0089326	3774	0.51803	0.028203
2947.2	0.79822	0.018025	3242	0.68056	0.0074296	3831.4	0.53879	0.0278
2992.1	0.80576	0.018065	3291.3	0.69748	0.0089429	3889.7	0.56186	0.028687
3037.6	0.80958	0.019044	3341.4	0.71372	0.008478	3948.9	0.58346	0.027848
3083.8	0.8208	0.016757	3392.2	0.72944	0.0092943	4009	0.60632	0.027226
3130.8	0.82711	0.020173	3443.8	0.74465	0.009051	4070	0.62707	0.028114
3178.4	0.83801	0.019117	3496.2	0.76009	0.0088638	4131.9	0.64783	0.027783
3226.7	0.84595	0.023401	3549.4	0.77559	0.0096787	4194.7	0.66847	0.026081
3275.8	0.84889	0.027722	3603.4	0.78974	0.010316	4258.5	0.68984	0.027106
3325.6	0.86045	0.023582	3658.2	0.80349	0.010645	4323.3	0.71032	0.02498
3376.2	0.8693	0.022051	3713.8	0.81752	0.010157	4389	0.72696	0.025006
3427.5	0.8743	0.025028	3770.3	0.83006	0.0096513	4455.8	0.74568	0.024642
3479.6	0.88738	0.020532	3827.6	0.84268	0.0085873	4523.5	0.76436	0.024334
3532.5	0.89001	0.018395	3885.8	0.8552	0.0081899	4592.2	0.7814	0.024078
3586.2	0.89864	0.014299	3944.8	0.86695	0.0074424	4662	0.79703	0.022555
3640.7	0.90685	0.014615	4004.7	0.87634	0.0086439	4732.9	0.81203	0.022081
3696	0.9173	0.016272	4065.6	0.887	0.0090104	4804.8	0.82754	0.02208
3752.2	0.92549	0.016474	4127.4	0.89789	0.0083468	4877.8	0.84107	0.020352
3809.2	0.93217	0.018151	4190.1	0.90762	0.0080447	4951.9	0.85582	0.018771
3867	0.93664	0.012764	4253.7	0.91526	0.0080558	5027.1	0.86723	0.017552
3925.8	0.93938	0.010113	4318.3	0.92358	0.0078106	5103.5	0.8799	0.017439
3985.4	0.94771	0.010686	4383.9	0.93224	0.0080029	5181	0.8917	0.016692
4045.9	0.95576	0.011288	4450.5	0.93942	0.0067142	5259.7	0.90134	0.016411
4107.3	0.96131	0.0066743	4518.1	0.94596	0.0073879	5339.5	0.91198	0.01524
4169.7	0.9658	0.014536	4586.7	0.95162	0.007277	5420.6	0.92064	0.013349
4233	0.97019	0.013214	4656.3	0.95713	0.0056399	5502.9	0.92837	0.0139
4297.3	0.98107	0.012044	4727	0.96291	0.0066345	5586.5	0.93703	0.013805
4362.5	0.9809	0.019248	4798.7	0.96868	0.006873	5671.2	0.94473	0.012834
4428.7	0.9838	0.018086	4871.6	0.97267	0.0062131	5757.3	0.95005	0.012462
4495.9	0.98713	0.025222	4945.5	0.97623	0.0069961	5844.7	0.95595	0.012328
4564.1	0.98492	0.016653	5020.6	0.9804	0.0061592	5933.4	0.9608	0.011655
4633.4	0.98566	0.0084216	5096.7	0.98428	0.0057704	6023.4	0.96591	0.010514
4703.7	0.98942	0.015242	5174.1	0.98738	0.0051987	6114.8	0.97161	0.01075
4775.1	0.99378	0.024083	5252.6	0.98995	0.0049287	6207.6	0.97533	0.0096823
4847.5	0.99694	0.016017	5332.3	0.99331	0.0052604	6301.8	0.9794	0.011315
4921	0.99873	0.013699	5413.1	0.99578	0.0052138	6397.4	0.98301	0.0096619
4995.7	1.0017	0.013189	5495.3	0.997	0.0051788	6494.4	0.98645	0.0075068
5071.5	1.0064	0.0071631	5578.6	0.99969	0.0039264	6592.9	0.98799	0.0075575
5148.4	1.0052	0.010067	5663.2	1.0014	0.0039245	6692.9	0.9913	0.0065036
5226.4	1.0035	0.007548	5749.1	1.0027	0.0042275	6794.4	0.99311	0.0057933
5305.7	1.0043	0.01101	5836.3	1.0037	0.0038311	6897.4	0.99492	0.0054875
5386.1	1.0076	0.0092331	5924.8	1.0045	0.0040099	7002	0.99711	0.0038399
5467.8	1.0115	0.011211	6014.6	1.006	0.0032001	7108.1	0.99797	0.0038494
5550.7	1.016	0.015007	6105.8	1.0063	0.0026481	7215.9	0.99873	0.0029129
5634.8	1.0122	0.013531	6198.3	1.0065	0.003386	7325.3	0.99976	0.0030062
5720.3	1.0124	0.010883	6292.3	1.007	0.0034786	7436.3	1.0007	0.0028422
5807	1.0128	0.011225	6387.7	1.0083	0.0026536	7549	1.0017	0.003046
5895	1.0157	0.0021056	6484.5	1.0084	0.0023158	7663.5	1.0028	0.0022556
5984.3	1.0164	0.00377	6582.7	1.0088	0.0022823	7779.6	1.0038	0.0022494
6075	1.0098	0.0030485	6682.5	1.0079	0.0014338	7897.5	1.0036	0.0024738
6167.1	1.0052	0.0031389	6783.8	1.0093	0.0016725	8017.2	1.0051	0.0030045
6260.5	1.0103	0.0026898	6886.6	1.0094	0.0014974	8138.7	1.0068	0.0047115
6355.4	1.0133	0.0055281	6990.9	1.0082	0.0015499	8262	1.0065	0.0057317
6451.6	1.0128	0.00017097	7096.8	1.0075	0.0012118	8387.2	1.0075	0.0068236
6549.4	1.0107	0.0016388	7204.3	1.0077	0.0011611	8514.2	1.0081	0.0077722
6648.6	1.0109	0.0036755	7313.5	1.0082	0.00026767	8643.2	1.0078	0.0083083
6749.3	1.0092	0.0027608	7424.3	1.0076	0.00063252	8774.1	1.0081	0.009174
6851.6	1.0046	0.0041201	7536.7	1.0072	0.0016822	8907	1.0078	0.010798
6955.3	1.0078	0.0079002	7650.9	1.008	0.0013694	9041.9	1.0061	0.010519
7060.7	1.0071	0.003806	7766.7	1.0062	0.002069	9178.9	1.0068	0.010044
7167.6	1.0081	0.0019524	7884.4	1.0057	0.0029486	9317.9	1.0075	0.0091313
7276.2	1.0035	0.0044323	8003.8	1.0056	0.0018747	9459	1.0085	0.0073714
7386.3	1.0006	0.0002932	8125	1.0047	0.0019637	9602.3	1.0093	0.0055257
7498.2	1.0041	0.004575	8248	1.0043	0.0019676	9747.7	1.0092	0.0055629
7611.7	1.008	0.010172	8372.9	1.0039	0.0026143	9895.3	1.0087	0.0050574
7727	1.0088	0.0082037	8499.7	1.0037	0.0026507	10045	1.0088	0.0048895
7844	1.0069	0.010275	8628.4	1.0031	0.0029051	10197	1.0078	0.0041824
7962.7	1.0027	0.010328	8759	1.002	0.0027901	10352	1.0082	0.0053703
8083.3	0.99733	0.0079376	8891.6	1.0005	0.0032231	10508	1.0066	0.0049314
8205.6	0.99865	0.01175	9026.2	0.99976	0.0028742	10667	1.0051	0.0053376
8329.8	0.9934	0.0019525	9162.8	0.99843	0.003569	10829	1.0042	0.0041362
8455.9	0.9876	0.0017149	9301.5	0.99683	0.0027477	10993	1.0045	0.0031957
8583.9	0.98642	0.0013862	9442.3	0.99596	0.0039757	11159	1.0035	0.0022895
8713.8	0.98336	0.0062818	9585.2	0.99487	0.0040882	11328	1.0026	0.0027297
8845.7	0.9874	0.0066771	9730.3	0.99245	0.005307	11499	1.0021	0.0035072
8979.6	0.98783	0.0095042	9877.5	0.99038	0.0055726	11673	1.0015	0.0049708
9115.5	0.98898	0.012719	10027	0.98857	0.0048235	11850	1.0013	0.004972
9253.4	0.98436	0.0076256	10179	0.98695	0.0060754	12030	1.0002	0.0048088
9393.5	0.9779	0.0063128	10333	0.98518	0.006654	12212	0.99795	0.0042065
9535.6	0.97733	0.01448	10489	0.98347	0.0080226	12396	0.99452	0.0038342
9679.9	0.97228	0.015018	10648	0.9818	0.008841	12584	0.9927	0.0044501
9826.3	0.96943	0.016373	10809	0.98016	0.0093203	12774	0.98944	0.0079708
10000	0.95906	0.011975	11000	0.97797	0.010148	13000	0.98604	0.012667
