# Supplementary material for: Single turnover transient state kinetics reveals processive protein unfolding catalyzed by Escherichia coli ClpB
Source: eLife. 2024 Oct 7;13:RP99052. doi: 10.7554/eLife.99052 (PMC11458177; doi:10.7554/eLife.99052)
Supplement: Figure 2—source data 1. — The data points corresponding to the fits shown in black in Figure 2B are tabulated after ‘fit data to Scheme 1' for each RepA-TitinX substrate. The sheet labeled ‘Figure 2C' are data points for total length vs. peak time shown in Figure 2C. [file elife-99052-fig2-data1.xlsx]

## Sheet: Figure 2 C
Total length of substrate(aa)	Peak time(s)
168	1010.8
265	1946.3
362	2991.5

## Sheet: Figure 2 B
	RepA-Titin1		RepA-Titin 2		RepA-Titin 3				Fit data to Scheme 1			RepA-Titin1		RepA-Titin 2		RepA-Titin 3
time (s)	Relative fluorescence enhancement	time (s)	Relative fluorescence enhancement	time (s)	Relative fluorescence enhancement						time (s)	Relative fluorescence enhancement	time (s)	Relative fluorescence enhancement	time (s)	Relative fluorescence enhancement
0.18864	-0.0018121	0.30182	-0.0019993	0.37729	-0.0023873						0.18864	8.532e-15	0.30182	1.4368e-27	0.37729	1.62e-41
0.38014	-0.0013333	0.60821	-0.0023362	0.76026	-0.0013287						0.19057	8.8632e-15	0.30492	1.5506e-27	0.38115	1.8183e-41
0.57451	-0.0010193	0.91921	-0.0011753	1.149	-0.0016358						0.19252	9.2073e-15	0.30804	1.6733e-27	0.38506	2.0409e-41
0.77183	-0.0032815	1.2349	-0.0013293	1.5437	-0.00054937						0.1945	9.5647e-15	0.3112	1.8057e-27	0.38901	2.2906e-41
0.97211	-0.00040703	1.5554	-0.00036805	1.9442	-0.00077516						0.19649	9.936e-15	0.31439	1.9487e-27	0.39299	2.571e-41
1.1754	-0.00021185	1.8807	0.00059436	2.3509	-0.00075574						0.1985	1.0322e-14	0.31761	2.1029e-27	0.39702	2.8856e-41
1.3818	-0.0023928	2.2109	0.0020572	2.7636	0.00033681						0.20054	1.0723e-14	0.32086	2.2694e-27	0.40109	3.2387e-41
1.5913	-0.00099501	2.5461	-0.00069888	3.1826	-0.00065134						0.20259	1.1139e-14	0.32415	2.449e-27	0.4052	3.635e-41
1.804	0.00020277	2.8863	0.0003706	3.6079	0.00027733						0.20467	1.1571e-14	0.32747	2.6429e-27	0.40935	4.0797e-41
2.0198	0.00094835	3.2317	0.00033812	4.0397	-0.00027623						0.20676	1.202e-14	0.33083	2.852e-27	0.41355	4.579e-41
2.239	0.0022261	3.5823	-0.00080354	4.4779	-0.0018519						0.20888	1.2487e-14	0.33422	3.0778e-27	0.41778	5.1394e-41
2.4614	-0.0018267	3.9382	-0.0011825	4.9228	9.1593e-05						0.21102	1.2972e-14	0.33765	3.3214e-27	0.42206	5.7683e-41
2.6872	0.00046827	4.2995	-0.0005088	5.3744	6.0031e-05						0.21319	1.3475e-14	0.34111	3.5843e-27	0.42639	6.4741e-41
2.9164	-0.00013305	4.6662	-6.7298e-05	5.8327	0.00021541						0.21537	1.3999e-14	0.3446	3.868e-27	0.43076	7.2664e-41
3.149	-0.00080832	5.0384	-0.00019722	6.298	0.00026519						0.21758	1.4542e-14	0.34813	4.1741e-27	0.43517	8.1557e-41
3.3852	-0.0019734	5.4163	-0.00013948	6.7704	-0.00070597						0.21981	1.5106e-14	0.3517	4.5045e-27	0.43963	9.1537e-41
3.6249	0.00068043	5.7999	-8.1734e-05	7.2498	0.00029189						0.22206	1.5693e-14	0.3553	4.8611e-27	0.44414	1.0274e-40
3.8683	-0.00060586	6.1892	-0.00020444	7.7365	-5.5294e-05						0.22434	1.6302e-14	0.35894	5.2458e-27	0.44869	1.1531e-40
4.1153	6.6987e-05	6.5845	0.00036338	8.2306	-8.4429e-05						0.22663	1.6935e-14	0.36262	5.661e-27	0.45329	1.2942e-40
4.366	0.0001858	6.9857	-0.00035121	8.7321	0.00075198						0.22896	1.7592e-14	0.36634	6.1091e-27	0.45793	1.4526e-40
4.6206	-0.00050645	7.3929	0.0010948	9.2411	0.001087						0.2313	1.8275e-14	0.37009	6.5927e-27	0.46262	1.6303e-40
4.8789	0.00017852	7.8063	-0.00013346	9.7579	0.00046185						0.23367	1.8985e-14	0.37389	7.1145e-27	0.46736	1.8298e-40
5.1412	-0.0010799	8.2259	0.0014317	10.282	0.00046427						0.23607	1.9722e-14	0.37772	7.6776e-27	0.47215	2.0537e-40
5.4075	-0.00027732	8.6519	-0.0010586	10.815	0.00048127						0.23849	2.0487e-14	0.38159	8.2852e-27	0.47699	2.3051e-40
5.6777	-0.00015972	9.0843	-0.0010273	11.355	0.00086123						0.24093	2.1283e-14	0.3855	8.941e-27	0.48188	2.5871e-40
5.952	0.00025732	9.5232	-0.00031873	11.904	-0.00070718						0.2434	2.2109e-14	0.38945	9.6487e-27	0.48682	2.9037e-40
6.2305	0.0011848	9.9688	-0.00011782	12.461	-0.00030051						0.24589	2.2967e-14	0.39344	1.0412e-26	0.49181	3.259e-40
6.5132	0.00020519	10.421	-0.00033557	13.026	-7.9573e-05						0.24841	2.3859e-14	0.39747	1.1237e-26	0.49685	3.6578e-40
6.8001	0.0008053	10.88	-0.00011061	13.6	-0.00031144						0.25096	2.4785e-14	0.40154	1.2126e-26	0.50194	4.1054e-40
7.0914	-0.0010241	11.346	-0.00014549	14.183	0.00010616						0.25353	2.5747e-14	0.40566	1.3086e-26	0.50708	4.6078e-40
7.387	0.00062708	11.819	0.0012873	14.774	0.00019114						0.25613	2.6746e-14	0.40982	1.4121e-26	0.51228	5.1717e-40
7.6871	0.0008453	12.299	0.00048007	15.374	-0.00050445						0.25875	2.7785e-14	0.41401	1.5239e-26	0.51753	5.8045e-40
7.9918	0.00074953	12.787	-5.5268e-05	15.984	-0.00017305						0.26141	2.8863e-14	0.41826	1.6445e-26	0.52283	6.5148e-40
8.301	0.0010211	13.282	-0.0012114	16.602	0.00018749						0.26408	2.9984e-14	0.42254	1.7747e-26	0.52819	7.312e-40
8.615	-0.00057797	13.784	-3.3614e-05	17.23	-0.00017426						0.26679	3.1147e-14	0.42687	1.9151e-26	0.5336	8.2067e-40
8.9336	0.00067921	14.294	-0.00044504	17.867	0.0002142						0.26952	3.2357e-14	0.43125	2.0667e-26	0.53907	9.2109e-40
9.2571	0.00042584	14.811	0.0011983	18.514	0.00048005						0.27229	3.3613e-14	0.43567	2.2303e-26	0.54459	1.0338e-39
9.5854	-4.3335e-05	15.337	-0.0010381	19.171	0.0003186						0.27508	3.4917e-14	0.44013	2.4068e-26	0.55017	1.1603e-39
9.9187	0.00024641	15.87	0.0012837	19.837	6.1245e-05						0.2779	3.6273e-14	0.44464	2.5973e-26	0.55581	1.3023e-39
10.257	0.00037249	16.411	0.0011369	20.514	0.00069492						0.28074	3.7681e-14	0.4492	2.8029e-26	0.56151	1.4616e-39
10.601	-0.00087984	16.961	0.00088549	21.201	0.00023848						0.28362	3.9144e-14	0.4538	3.0247e-26	0.56726	1.6405e-39
10.949	0.00025732	17.519	0.00054143	21.898	0.0010603						0.28653	4.0663e-14	0.45845	3.2641e-26	0.57307	1.8412e-39
11.303	0.0015388	18.085	0.00030564	22.606	0.00036716						0.28946	4.2241e-14	0.46315	3.5225e-26	0.57895	2.0665e-39
11.662	0.0018152	18.66	-0.0004691	23.324	0.0010518						0.29243	4.3881e-14	0.4679	3.8013e-26	0.58488	2.3194e-39
12.027	0.00019186	19.243	0.00053782	24.054	5.6389e-05						0.29543	4.5585e-14	0.47269	4.1021e-26	0.59087	2.6032e-39
12.397	0.00046463	19.835	-9.617e-05	24.794	0.00035502						0.29845	4.7354e-14	0.47753	4.4268e-26	0.59693	2.9218e-39
12.773	0.0018552	20.436	0.00067857	25.545	-0.00017669						0.30151	4.9192e-14	0.48243	4.7771e-26	0.60304	3.2793e-39
13.154	-0.00036703	21.047	0.00017691	26.308	0.0005274						0.3046	5.1102e-14	0.48737	5.1552e-26	0.60922	3.6805e-39
13.541	0.00071437	21.666	0.0011333	27.083	0.00091343						0.30772	5.3085e-14	0.49237	5.5632e-26	0.61547	4.1309e-39
13.934	0.00086834	22.295	0.0010671	27.869	-0.00021796						0.31088	5.5146e-14	0.49741	6.0035e-26	0.62177	4.6364e-39
14.333	0.0016333	22.933	0.0010768	28.666	0.0012327						0.31406	5.7287e-14	0.50251	6.4787e-26	0.62815	5.2037e-39
14.738	0.00028763	23.581	0.0011321	29.476	0.0014075						0.31728	5.951e-14	0.50766	6.9914e-26	0.63458	5.8404e-39
15.149	3.3042e-05	24.239	-3.8426e-05	30.299	0.00055168						0.32053	6.182e-14	0.51286	7.5448e-26	0.64109	6.5551e-39
15.566	0.00060284	24.906	0.00096609	31.133	0.00013287						0.32382	6.422e-14	0.51812	8.1419e-26	0.64766	7.3571e-39
15.99	0.0012963	25.584	-0.00017316	31.98	0.0014354						0.32713	6.6713e-14	0.52342	8.7863e-26	0.65429	8.2574e-39
16.42	-2.1513e-05	26.272	-0.00057617	32.84	-0.00024103						0.33049	6.9302e-14	0.52879	9.4816e-26	0.661	9.2677e-39
16.856	8.6384e-05	26.97	0.0012392	33.713	0.00048855						0.33387	7.1992e-14	0.53421	1.0232e-25	0.66777	1.0402e-38
17.299	0.001049	27.679	3.6798e-06	34.599	0.0001098						0.33729	7.4787e-14	0.53968	1.1042e-25	0.67461	1.1675e-38
17.749	-0.00027974	28.399	-0.00049798	35.498	0.00085031						0.34075	7.769e-14	0.54521	1.1916e-25	0.68153	1.3103e-38
18.206	0.00068164	29.129	0.00073511	36.411	0.00094014						0.34424	8.0705e-14	0.5508	1.2859e-25	0.68851	1.4706e-38
18.669	0.00083439	29.871	0.00038263	37.338	0.00064758						0.34777	8.3838e-14	0.55644	1.3876e-25	0.69557	1.6506e-38
19.139	0.001266	30.623	-0.00072775	38.279	0.00072284						0.35133	8.7092e-14	0.56215	1.4975e-25	0.70269	1.8525e-38
19.617	0.0020892	31.387	0.00010473	39.234	0.0014209						0.35493	9.0472e-14	0.56791	1.616e-25	0.70989	2.0792e-38
20.102	-0.0008459	32.163	0.00045481	40.203	0.00059781						0.35857	9.3984e-14	0.57373	1.7439e-25	0.71717	2.3336e-38
20.594	0.0006186	32.95	5.6612e-05	41.187	0.00023848						0.36225	9.7632e-14	0.5796	1.8819e-25	0.72452	2.6191e-38
21.093	0.0010902	33.749	0.0010587	42.186	0.00087216						0.36596	1.0142e-13	0.58554	2.0308e-25	0.73194	2.9396e-38
21.6	0.00073377	34.56	-5.5268e-05	43.2	0.00060995						0.36971	1.0536e-13	0.59154	2.1915e-25	0.73944	3.2993e-38
22.115	0.00066951	35.383	8.1876e-05	44.229	0.00069978						0.3735	1.0945e-13	0.59761	2.365e-25	0.74702	3.703e-38
22.637	0.00087925	36.219	0.00071346	45.274	0.00039144						0.37732	1.137e-13	0.60373	2.5521e-25	0.75468	4.1561e-38
23.167	0.00053858	37.068	7.7064e-05	46.335	0.0008406						0.38119	1.1811e-13	0.60992	2.7541e-25	0.76241	4.6646e-38
23.706	0.0011035	37.929	0.00036218	47.411	-0.00022039						0.3851	1.2269e-13	0.61617	2.9721e-25	0.77022	5.2354e-38
24.252	0.0014163	38.803	0.001647	48.504	0.00030646						0.38904	1.2745e-13	0.62248	3.2073e-25	0.77811	5.8759e-38
24.807	0.0016188	39.691	2.5334e-05	49.613	0.0013092						0.39303	1.324e-13	0.62886	3.4611e-25	0.78609	6.5949e-38
25.37	0.00074347	40.591	0.00059316	50.739	0.0017219						0.39706	1.3754e-13	0.6353	3.735e-25	0.79414	7.4018e-38
25.941	0.00080651	41.506	0.0011874	51.882	0.0010069						0.40113	1.4288e-13	0.64181	4.0306e-25	0.80228	8.3074e-38
26.521	0.00075438	42.434	0.00016609	53.042	0.00055532						0.40524	1.4843e-13	0.64839	4.3496e-25	0.8105	9.3239e-38
27.11	0.00012033	43.376	0.0011634	54.22	0.0010458						0.40939	1.5419e-13	0.65504	4.6938e-25	0.81881	1.0465e-37
27.708	0.0012611	44.333	0.0013691	55.416	0.0011866						0.41359	1.6017e-13	0.66175	5.0652e-25	0.8272	1.1745e-37
28.315	0.0013848	45.304	0.0012211	56.63	0.0014633						0.41782	1.6639e-13	0.66853	5.4661e-25	0.83568	1.3182e-37
28.931	0.0016612	46.289	-6.9704e-05	57.861	0.00091829						0.42211	1.7285e-13	0.67538	5.8987e-25	0.84424	1.4795e-37
29.556	0.00040523	47.29	8.4919e-06	59.112	0.00050069						0.42643	1.7955e-13	0.6823	6.3655e-25	0.85289	1.6605e-37
30.191	0.00052282	48.305	0.00062564	60.381	0.00050312						0.4308	1.8652e-13	0.68929	6.8692e-25	0.86163	1.8637e-37
30.835	0.00010821	49.336	0.0002094	61.67	0.00021299						0.43522	1.9376e-13	0.69636	7.4128e-25	0.87046	2.0917e-37
31.489	0.00049251	50.382	0.00044639	62.978	-0.00024467						0.43968	2.0128e-13	0.70349	7.9994e-25	0.87938	2.3476e-37
32.153	0.00060163	51.444	0.00047285	64.305	0.00018385						0.44418	2.0909e-13	0.7107	8.6325e-25	0.88839	2.6349e-37
32.827	0.00038219	52.522	0.00058714	65.653	0.00058445						0.44873	2.1721e-13	0.71798	9.3156e-25	0.8975	2.9572e-37
33.511	0.0010441	53.617	-9.1358e-05	67.021	0.00063423						0.45333	2.2564e-13	0.72534	1.0053e-24	0.90669	3.3191e-37
34.205	0.00023671	54.728	0.00056549	68.41	0.00013894						0.45798	2.344e-13	0.73277	1.0848e-24	0.91598	3.7251e-37
34.91	0.0018382	55.856	0.00041872	69.82	0.00087094						0.46267	2.4349e-13	0.74028	1.1707e-24	0.92537	4.1809e-37
35.625	0.0021413	57	0.00033331	71.251	2.9754e-06						0.46741	2.5294e-13	0.74787	1.2633e-24	0.93485	4.6924e-37
36.352	0.0014357	58.162	0.00056669	72.703	0.00026033						0.4722	2.6276e-13	0.75553	1.3633e-24	0.94443	5.2665e-37
37.089	0.00053495	59.342	9.8718e-05	74.178	0.00096321						0.47704	2.7296e-13	0.76328	1.4712e-24	0.95411	5.9109e-37
37.837	0.0016806	60.54	0.00069782	75.674	0.0011829						0.48193	2.8355e-13	0.7711	1.5876e-24	0.96389	6.6341e-37
38.597	0.0006974	61.755	0.0010178	77.194	0.00098748						0.48687	2.9456e-13	0.779	1.7132e-24	0.97377	7.4457e-37
39.368	0.0010866	62.989	0.00026353	78.736	-6.9861e-05						0.49186	3.0599e-13	0.78698	1.8488e-24	0.98374	8.3566e-37
40.151	0.001369	64.241	0.00028037	80.301	0.00064758						0.4969	3.1786e-13	0.79505	1.9951e-24	0.99382	9.379e-37
40.945	0.00088531	65.512	0.0010732	81.891	0.00059781						0.50199	3.302e-13	0.80319	2.153e-24	1.004	1.0527e-36
41.752	0.00154	66.803	0.00047406	83.504	0.00056503						0.50713	3.4301e-13	0.81142	2.3233e-24	1.0143	1.1814e-36
42.571	6.9412e-05	68.113	5.6612e-05	85.141	2.7254e-05						0.51233	3.5632e-13	0.81974	2.5072e-24	1.0247	1.326e-36
43.402	0.00081015	69.443	-0.00021888	86.803	8.1882e-05						0.51758	3.7015e-13	0.82814	2.7056e-24	1.0352	1.4882e-36
44.245	-0.00028701	70.793	0.00035376	88.491	0.00058567						0.52288	3.8452e-13	0.83663	2.9197e-24	1.0458	1.6703e-36
45.102	0.0015388	72.163	0.0013354	90.203	0.00044728						0.52824	3.9944e-13	0.8452	3.1507e-24	1.0565	1.8746e-36
45.971	0.001443	73.554	0.00093601	91.942	0.00046185						0.53365	4.1494e-13	0.85386	3.4e-24	1.0673	2.104e-36
46.853	0.00088289	74.965	0.00097331	93.707	0.00032103						0.53912	4.3105e-13	0.86261	3.6691e-24	1.0783	2.3614e-36
47.749	0.00059314	76.399	0.0012584	95.498	0.00010616						0.54465	4.4777e-13	0.87145	3.9594e-24	1.0893	2.6503e-36
48.658	0.00040159	77.853	0.00060037	97.317	0.0011283						0.55023	4.6515e-13	0.88038	4.2727e-24	1.1005	2.9745e-36
49.581	0.00076529	79.33	0.00081331	99.163	0.0003538						0.55587	4.832e-13	0.8894	4.6108e-24	1.1118	3.3384e-36
50.518	0.00075317	80.829	0.0006112	101.04	0.00025426						0.56156	5.0195e-13	0.89852	4.9756e-24	1.1232	3.7468e-36
51.469	0.0011714	82.351	-0.00012504	102.94	0.00032831						0.56732	5.2143e-13	0.90772	5.3693e-24	1.1347	4.2052e-36
52.435	0.00026823	83.895	0.00016007	104.87	0.00014622						0.57313	5.4167e-13	0.91703	5.7942e-24	1.1463	4.7197e-36
53.415	0.0018952	85.463	0.0002527	106.83	-0.00044497						0.579	5.6269e-13	0.92642	6.2527e-24	1.158	5.2971e-36
54.409	0.0012284	87.055	-4.2035e-05	108.82	0.00064879						0.58494	5.8452e-13	0.93592	6.7474e-24	1.1699	5.9451e-36
55.419	0.0016624	88.671	0.00021541	110.84	0.00039872						0.59093	6.072e-13	0.94551	7.2813e-24	1.1819	6.6724e-36
56.444	0.00088773	90.311	0.00027917	112.89	0.0011174						0.59699	6.3077e-13	0.9552	7.8574e-24	1.194	7.4887e-36
57.485	0.0020734	91.975	0.00024428	114.97	0.0012206						0.6031	6.5524e-13	0.96498	8.4792e-24	1.2062	8.4048e-36
58.541	0.0016285	93.665	0.00027075	117.08	0.0004837						0.60929	6.8067e-13	0.97487	9.1501e-24	1.2186	9.433e-36
59.613	0.00083924	95.381	5.0597e-05	119.23	0.00032953						0.61553	7.0708e-13	0.98486	9.874e-24	1.2311	1.0587e-35
60.701	0.0013314	97.122	0.0010936	121.4	0.00079204						0.62184	7.3452e-13	0.99495	1.0655e-23	1.2437	1.1882e-35
61.806	0.0014769	98.889	0.00069541	123.61	0.00052497						0.62821	7.6303e-13	1.0052	1.1498e-23	1.2565	1.3336e-35
62.927	0.0015824	100.68	0.00033932	125.85	0.00023241						0.63465	7.9263e-13	1.0155	1.2408e-23	1.2693	1.4967e-35
64.065	0.0011666	102.5	0.0010575	128.13	0.00038901						0.64115	8.2339e-13	1.0259	1.339e-23	1.2823	1.6798e-35
65.221	0.0016976	104.35	0.0007291	130.44	0.00011344						0.64772	8.5534e-13	1.0364	1.4449e-23	1.2955	1.8853e-35
66.394	0.0025123	106.23	0.0013847	132.79	0.00068036						0.65436	8.8853e-13	1.047	1.5593e-23	1.3088	2.1159e-35
67.585	0.0018334	108.14	-0.00044865	135.17	0.00033924						0.66106	9.2301e-13	1.0577	1.6826e-23	1.3222	2.3748e-35
68.793	0.00062708	110.07	0.00071707	137.59	0.00069492						0.66784	9.5882e-13	1.0686	1.8158e-23	1.3357	2.6653e-35
70.02	0.0015679	112.03	0.00091195	140.04	0.00030889						0.67468	9.9603e-13	1.0795	1.9594e-23	1.3494	2.9913e-35
71.265	0.0014745	114.02	-1.1322e-06	142.53	0.00087216						0.68159	1.0347e-12	1.0906	2.1145e-23	1.3632	3.3572e-35
72.529	0.0014066	116.05	-2.3989e-05	145.06	0.00043635						0.68858	1.0748e-12	1.1017	2.2818e-23	1.3772	3.7679e-35
73.813	0.0014515	118.1	0.00054263	147.62	0.00048491						0.69564	1.1165e-12	1.113	2.4623e-23	1.3913	4.2289e-35
75.115	0.0018879	120.18	0.0011574	150.23	0.00056989						0.70276	1.1598e-12	1.1244	2.6571e-23	1.4056	4.7461e-35
76.437	0.00084167	122.3	0.00015646	152.88	0.00077383						0.70997	1.2049e-12	1.136	2.8673e-23	1.42	5.3267e-35
77.78	0.0024092	124.45	0.00011075	155.56	0.0003708						0.71724	1.2516e-12	1.1476	3.0942e-23	1.4345	5.9783e-35
79.142	0.0016794	126.63	-8.6546e-05	158.28	0.00045699						0.72459	1.3002e-12	1.1594	3.339e-23	1.4492	6.7096e-35
80.525	0.0018721	128.84	0.00088549	161.05	0.00018142						0.73202	1.3506e-12	1.1712	3.6031e-23	1.4641	7.5304e-35
81.929	0.0015133	131.09	0.00090955	163.86	0.00021906						0.73952	1.403e-12	1.1832	3.8882e-23	1.4791	8.4515e-35
83.354	0.0015982	133.37	0.00071466	166.71	0.00030282						0.7471	1.4575e-12	1.1954	4.1958e-23	1.4942	9.4853e-35
84.801	0.0016988	135.68	0.00059075	169.6	0.0014888						0.75475	1.514e-12	1.2076	4.5278e-23	1.5096	1.0646e-34
86.269	0.00075074	138.03	0.0011105	172.54	0.00014137						0.76249	1.5727e-12	1.22	4.886e-23	1.525	1.1948e-34
87.76	0.0015339	140.41	-0.0003488	175.52	0.00034531						0.7703	1.6338e-12	1.2325	5.2725e-23	1.5406	1.3409e-34
89.273	0.0022177	142.84	0.00071466	178.54	0.00028461						0.77819	1.6971e-12	1.2451	5.6896e-23	1.5564	1.5049e-34
90.809	0.0026165	145.29	0.00019616	181.62	0.00054925						0.78617	1.763e-12	1.2579	6.1397e-23	1.5724	1.689e-34
92.368	0.0012575	147.79	0.00058834	184.74	0.00013287						0.79422	1.8314e-12	1.2708	6.6255e-23	1.5885	1.8956e-34
93.95	0.0015485	150.32	-2.3353e-06	187.9	0.00013772						0.80236	1.9024e-12	1.2838	7.1496e-23	1.6048	2.1275e-34
95.557	0.0021134	152.89	0.00088549	191.11	0.00065608						0.81058	1.9762e-12	1.297	7.7152e-23	1.6212	2.3877e-34
97.187	0.0014551	155.5	0.00071707	194.38	0.00062209						0.81889	2.0529e-12	1.3102	8.3256e-23	1.6378	2.6798e-34
98.843	0.0011532	158.15	0.00037782	197.68	5.4746e-07						0.82728	2.1326e-12	1.3237	8.9842e-23	1.6546	3.0076e-34
100.52	0.0017509	160.84	8.4282e-05	201.05	0.00012437						0.83576	2.2153e-12	1.3372	9.6949e-23	1.6716	3.3754e-34
102.23	0.001426	163.57	0.00020458	204.46	0.0003623						0.84432	2.3012e-12	1.3509	1.0462e-22	1.6887	3.7883e-34
103.96	0.0018891	166.34	-0.00029587	207.92	0.00036716						0.85298	2.3905e-12	1.3648	1.1289e-22	1.706	4.2516e-34
105.72	0.0019134	169.15	0.00039707	211.43	0.00099234						0.86172	2.4833e-12	1.3788	1.2183e-22	1.7235	4.7716e-34
107.5	0.0021146	172	0.00065331	215	0.00030768						0.87055	2.5796e-12	1.3929	1.3146e-22	1.7412	5.3553e-34
109.31	0.0012223	174.9	-0.00014549	218.63	0.00076169						0.87947	2.6797e-12	1.4072	1.4186e-22	1.759	6.0103e-34
111.15	0.0011447	177.84	0.00072188	222.3	0.00065851						0.88848	2.7836e-12	1.4216	1.5308e-22	1.777	6.7454e-34
113.02	0.0020152	180.83	0.00018533	226.03	0.00055896						0.89759	2.8916e-12	1.4362	1.6519e-22	1.7952	7.5704e-34
114.91	0.0013096	183.86	-0.00025136	229.82	0.00026033						0.90678	3.0038e-12	1.4509	1.7826e-22	1.8136	8.4964e-34
116.83	0.0021061	186.93	0.00031045	233.67	0.00033924						0.91608	3.1203e-12	1.4657	1.9236e-22	1.8322	9.5355e-34
118.79	0.0020358	190.06	0.00020699	237.57	0.00071677						0.92546	3.2413e-12	1.4808	2.0758e-22	1.851	1.0702e-33
120.77	0.0017946	193.23	0.00042594	241.54	0.00022391						0.93495	3.3671e-12	1.4959	2.24e-22	1.87	1.2011e-33
122.78	0.0017376	196.45	0.00057511	245.56	0.00035259						0.94453	3.4977e-12	1.5113	2.4172e-22	1.8891	1.348e-33
124.82	0.0019461	199.71	0.00047526	249.64	0.00015593						0.95421	3.6334e-12	1.5268	2.6084e-22	1.9085	1.5128e-33
126.89	0.0017812	203.03	0.00014443	253.79	0.00046063						0.96398	3.7743e-12	1.5424	2.8147e-22	1.928	1.6978e-33
129	0.0020649	206.39	0.00013	257.99	0.00070585						0.97386	3.9207e-12	1.5582	3.0373e-22	1.9478	1.9055e-33
131.13	0.0022346	209.81	0.00077601	262.26	0.00039265						0.98384	4.0728e-12	1.5742	3.2776e-22	1.9677	2.1385e-33
133.3	0.0020722	213.28	0.00042233	266.6	0.00057232						0.99392	4.2308e-12	1.5903	3.5368e-22	1.9879	2.4001e-33
135.5	0.0022261	216.8	0.00058233	271	0.00026033						1.0041	4.3949e-12	1.6066	3.8166e-22	2.0083	2.6936e-33
137.73	0.0017036	220.37	0.0001721	275.47	0.00046549						1.0144	4.5654e-12	1.6231	4.1185e-22	2.0289	3.023e-33
140	0.0020673	224	6.0221e-05	280	0.00029068						1.0248	4.7425e-12	1.6397	4.4442e-22	2.0497	3.3927e-33
142.3	0.0018818	227.68	0.00035496	284.6	0.00045213						1.0353	4.9264e-12	1.6565	4.7957e-22	2.0707	3.8076e-33
144.64	0.0023243	231.42	0.00040428	289.27	0.00022877						1.0459	5.1175e-12	1.6735	5.1751e-22	2.0919	4.2733e-33
147.01	0.0020843	235.21	-0.00021527	294.02	0.00036959						1.0566	5.316e-12	1.6906	5.5844e-22	2.1133	4.7959e-33
149.42	0.0026383	239.07	0.00029361	298.83	0.00035502						1.0675	5.5222e-12	1.7079	6.0261e-22	2.135	5.3824e-33
151.86	0.002665	242.98	0.00022624	303.72	0.00043878						1.0784	5.7364e-12	1.7255	6.5027e-22	2.1568	6.0406e-33
154.34	0.0025511	246.94	0.00070985	308.68	-0.00030051						1.0894	5.9588e-12	1.7431	7.017e-22	2.1789	6.7794e-33
156.86	0.0026553	250.97	0.00048609	313.72	5.8817e-05						1.1006	6.19e-12	1.761	7.5719e-22	2.2013	7.6084e-33
159.41	0.0022807	255.06	0.00051376	318.83	-2.009e-05						1.1119	6.43e-12	1.779	8.1708e-22	2.2238	8.5388e-33
162.01	0.0019182	259.21	0.00030804	324.02	0.00060388						1.1233	6.6794e-12	1.7973	8.817e-22	2.2466	9.583e-33
164.64	0.0022528	263.43	0.00086504	329.28	0.00014258						1.1348	6.9385e-12	1.8157	9.5144e-22	2.2696	1.0755e-32
167.32	0.002168	267.7	0.00050895	334.63	0.00033438						1.1464	7.2076e-12	1.8343	1.0267e-21	2.2929	1.207e-32
170.03	0.0022177	272.05	0.00033812	340.06	0.00059538						1.1582	7.4871e-12	1.8531	1.1079e-21	2.3164	1.3546e-32
172.78	0.0023074	276.45	0.00047406	345.57	-0.00016941						1.17	7.7774e-12	1.8721	1.1955e-21	2.3401	1.5203e-32
175.58	0.0024929	280.93	0.00094444	351.16	0.0006318						1.182	8.0791e-12	1.8913	1.29e-21	2.3641	1.7062e-32
178.42	0.0025571	285.47	0.00045481	356.84	0.00072284						1.1941	8.3924e-12	1.9106	1.3921e-21	2.3883	1.9148e-32
181.3	0.0027232	290.08	0.00039827	362.6	0.0010069						1.2064	8.7179e-12	1.9302	1.5021e-21	2.4128	2.1489e-32
184.22	0.002528	294.76	0.00030804	368.45	0.00052618						1.2187	9.0559e-12	1.95	1.6209e-21	2.4375	2.4117e-32
187.19	0.0019679	299.51	0.00063165	374.39	0.00094378						1.2312	9.4071e-12	1.97	1.7491e-21	2.4625	2.7066e-32
190.21	0.0032663	304.33	0.00068579	380.41	0.0010178						1.2438	9.7719e-12	1.9902	1.8875e-21	2.4878	3.0375e-32
193.27	0.0024444	309.23	0.00064729	386.53	0.00039265						1.2566	1.0151e-11	2.0106	2.0367e-21	2.5132	3.409e-32
196.37	0.0026602	314.19	0.00030323	392.74	0.00034895						1.2695	1.0545e-11	2.0312	2.1978e-21	2.539	3.8258e-32
199.52	0.0033051	319.24	0.00047406	399.05	0.00053832						1.2825	1.0953e-11	2.052	2.3716e-21	2.565	4.2936e-32
202.72	0.0026141	324.36	0.00083616	405.45	-2.7373e-05						1.2956	1.1378e-11	2.073	2.5591e-21	2.5913	4.8186e-32
205.97	0.0023389	329.55	0.00019616	411.94	0.00047884						1.3089	1.1819e-11	2.0943	2.7615e-21	2.6179	5.4078e-32
209.27	0.002682	334.83	0.0008097	418.54	0.00023363						1.3223	1.2278e-11	2.1157	2.9798e-21	2.6447	6.069e-32
212.62	0.0026868	340.18	0.00019616	425.23	0.00032953						1.3359	1.2754e-11	2.1374	3.2155e-21	2.6718	6.811e-32
216.01	0.0025171	345.62	0.00074113	432.02	0.0009717						1.3495	1.3248e-11	2.1593	3.4697e-21	2.6992	7.6438e-32
219.46	0.0024783	351.14	0.00072428	438.92	0.00061723						1.3634	1.3762e-11	2.1814	3.7441e-21	2.7268	8.5783e-32
222.96	0.0030239	356.74	0.00066895	445.92	0.00076412						1.3773	1.4295e-11	2.2038	4.0401e-21	2.7548	9.6272e-32
226.51	0.0031924	362.42	0.0002527	453.03	0.00078354						1.3915	1.485e-11	2.2264	4.3596e-21	2.783	1.0804e-31
230.12	0.0027838	368.2	0.00071466	460.24	0.0005796						1.4057	1.5426e-11	2.2492	4.7043e-21	2.8115	1.2125e-31
233.78	0.0026359	374.05	0.00034894	467.57	0.00065851						1.4201	1.6024e-11	2.2722	5.0763e-21	2.8403	1.3608e-31
237.5	0.002865	380	0.00034052	475	0.00066822						1.4347	1.6645e-11	2.2955	5.4776e-21	2.8694	1.5271e-31
241.27	0.00331	386.04	0.0010924	482.55	0.00075805						1.4494	1.729e-11	2.319	5.9107e-21	2.8988	1.7138e-31
245.1	0.0029002	392.16	0.00062684	490.2	0.00073377						1.4642	1.7961e-11	2.3428	6.3781e-21	2.9285	1.9234e-31
248.99	0.0034542	398.38	0.00072669	497.98	0.00046063						1.4792	1.8657e-11	2.3668	6.8824e-21	2.9586	2.1585e-31
252.94	0.0034542	404.7	0.0011068	505.87	0.00055896						1.4944	1.938e-11	2.3911	7.4265e-21	2.9889	2.4224e-31
256.94	0.0037913	411.11	0.00078684	513.89	0.0011356						1.5097	2.0132e-11	2.4156	8.0136e-21	3.0195	2.7185e-31
261.01	0.0033597	417.61	0.00098413	522.02	0.00068278						1.5252	2.0912e-11	2.4403	8.6472e-21	3.0504	3.0509e-31
265.14	0.0032663	424.22	0.00046082	530.27	0.00086123						1.5408	2.1723e-11	2.4653	9.3309e-21	3.0817	3.4238e-31
269.33	0.0028808	430.92	0.0010828	538.65	0.0011963						1.5566	2.2565e-11	2.4906	1.0069e-20	3.1133	3.8424e-31
273.58	0.0033451	437.73	0.00086022	547.16	0.00088066						1.5725	2.344e-11	2.5161	1.0865e-20	3.1452	4.3121e-31
277.9	0.003721	444.64	0.00055346	555.79	0.00081268						1.5887	2.4348e-11	2.5419	1.1723e-20	3.1774	4.8393e-31
282.28	0.0028081	451.65	0.00085662	564.56	0.0012108						1.6049	2.5292e-11	2.5679	1.265e-20	3.21	5.4308e-31
286.73	0.0036409	458.76	0.0014521	573.46	0.0007884						1.6214	2.6273e-11	2.5943	1.365e-20	3.2429	6.0947e-31
291.24	0.0037755	465.99	0.00097571	582.49	0.00073984						1.638	2.7291e-11	2.6208	1.473e-20	3.2761	6.8397e-31
295.83	0.0033524	473.32	0.0010371	591.66	0.0008758						1.6548	2.8349e-11	2.6477	1.5894e-20	3.3097	7.6758e-31
300.48	0.0037573	480.77	0.0012283	600.96	0.0011514						1.6717	2.9448e-11	2.6748	1.715e-20	3.3436	8.6141e-31
305.2	0.0034591	488.33	0.00082534	610.41	0.00060752						1.6889	3.0589e-11	2.7022	1.8506e-20	3.3778	9.667e-31
310	0.0040034	496	0.0011995	620	0.00090008						1.7062	3.1775e-11	2.7299	1.9969e-20	3.4125	1.0849e-30
314.86	0.0040131	503.79	0.0011911	629.73	0.00080661						1.7237	3.3007e-11	2.7579	2.1547e-20	3.4474	1.2175e-30
319.81	0.0039125	511.69	0.0013474	639.61	0.00075319						1.7413	3.4286e-11	2.7862	2.3251e-20	3.4828	1.3663e-30
324.82	0.0035876	519.71	0.0014413	649.64	0.00071192						1.7592	3.5615e-11	2.8147	2.5088e-20	3.5184	1.5333e-30
329.91	0.0038313	527.86	0.0011345	659.82	0.00051283						1.7772	3.6995e-11	2.8436	2.7072e-20	3.5545	1.7207e-30
335.08	0.0037828	536.13	0.0013811	670.16	0.00064515						1.7954	3.8429e-11	2.8727	2.9211e-20	3.5909	1.931e-30
340.32	0.0042059	544.52	0.0011586	680.65	0.00074348						1.8138	3.9918e-11	2.9021	3.152e-20	3.6277	2.167e-30
345.65	0.0036179	553.04	0.00157	691.3	0.00055168						1.8324	4.1465e-11	2.9319	3.4012e-20	3.6649	2.4319e-30
351.05	0.0041719	561.69	0.0013162	702.11	0.00072163						1.8512	4.3072e-11	2.9619	3.67e-20	3.7025	2.7291e-30
356.54	0.0043526	570.47	0.0012476	713.08	0.00072163						1.8701	4.4741e-11	2.9923	3.9601e-20	3.7404	3.0627e-30
362.11	0.0040107	579.38	0.0015941	724.22	0.00061359						1.8893	4.6475e-11	3.0229	4.273e-20	3.7787	3.437e-30
367.76	0.0041865	588.42	0.0015905	735.53	0.00063908						1.9087	4.8276e-11	3.0539	4.6108e-20	3.8174	3.8571e-30
373.5	0.0047745	597.6	0.0017035	747	0.00044485						1.9282	5.0147e-11	3.0852	4.9752e-20	3.8566	4.3284e-30
379.33	0.004909	606.92	0.0019862	758.65	0.00061844						1.948	5.209e-11	3.1168	5.3684e-20	3.8961	4.8574e-30
385.24	0.0049515	616.39	0.0017962	770.48	0.00048005						1.968	5.4109e-11	3.1488	5.7926e-20	3.936	5.4511e-30
391.24	0.0047332	625.99	0.0021342	782.49	0.00046185						1.9881	5.6206e-11	3.181	6.2504e-20	3.9763	6.1172e-30
397.34	0.0045575	635.74	0.0019959	794.67	0.0002749						2.0085	5.8383e-11	3.2136	6.7444e-20	4.0171	6.8648e-30
403.52	0.0048496	645.63	0.0024711	807.04	0.00055532						2.0291	6.0646e-11	3.2466	7.2774e-20	4.0583	7.7037e-30
409.8	0.0050618	655.68	0.0023315	819.6	0.00078111						2.0499	6.2995e-11	3.2798	7.8525e-20	4.0998	8.6451e-30
416.17	0.00524	665.88	0.002429	832.34	0.00059052						2.0709	6.5436e-11	3.3134	8.473e-20	4.1419	9.7016e-30
422.64	0.0051939	676.23	0.0022581	845.28	0.00082603						2.0921	6.7972e-11	3.3474	9.1426e-20	4.1843	1.0887e-29
429.21	0.0051345	686.73	0.002749	858.42	0.00056989						2.1135	7.0605e-11	3.3817	9.865e-20	4.2272	1.2217e-29
435.87	0.0053467	697.4	0.0026142	871.75	0.00059659						2.1352	7.3341e-11	3.4164	1.0645e-19	4.2705	1.371e-29
442.64	0.0056134	708.23	0.0023893	885.28	0.00061723						2.1571	7.6182e-11	3.4514	1.1486e-19	4.3143	1.5386e-29
449.51	0.0055419	719.22	0.0024759	899.02	0.00077262						2.1792	7.9133e-11	3.4867	1.2393e-19	4.3585	1.7266e-29
456.48	0.0053358	730.37	0.0025745	912.96	0.00074591						2.2015	8.2199e-11	3.5225	1.3372e-19	4.4031	1.9375e-29
463.56	0.0057274	741.7	0.0026178	927.12	0.0006403						2.2241	8.5384e-11	3.5586	1.4429e-19	4.4483	2.1743e-29
470.74	0.0057589	753.19	0.0026407	941.49	0.00063058						2.2469	8.8691e-11	3.595	1.5569e-19	4.4938	2.4399e-29
478.04	0.0058389	764.86	0.0030172	956.07	0.00046063						2.2699	9.2127e-11	3.6319	1.6799e-19	4.5399	2.7381e-29
485.44	0.0060074	776.7	0.0031712	970.88	0.00090129						2.2931	9.5696e-11	3.6691	1.8126e-19	4.5864	3.0726e-29
492.95	0.0066415	788.73	0.0032362	985.91	0.00090494						2.3166	9.9403e-11	3.7067	1.9559e-19	4.6334	3.448e-29
500.58	0.0065917	800.93	0.0032855	1001.2	0.0007799						2.3404	1.0325e-10	3.7447	2.1104e-19	4.6809	3.8693e-29
508.33	0.0066378	813.32	0.0032386	1016.7	0.00079082						2.3644	1.0725e-10	3.783	2.2771e-19	4.7289	4.342e-29
516.19	0.0067954	825.9	0.003638	1032.4	0.00072527						2.3886	1.1141e-10	3.8218	2.457e-19	4.7773	4.8725e-29
524.16	0.0070415	838.66	0.0040037	1048.3	0.00088551						2.4131	1.1572e-10	3.861	2.6511e-19	4.8263	5.4678e-29
532.26	0.0073604	851.62	0.0040638	1064.5	0.00096078						2.4378	1.202e-10	3.9005	2.8605e-19	4.8757	6.1357e-29
540.48	0.0074828	864.78	0.004296	1081	0.00086002						2.4628	1.2486e-10	3.9405	3.0865e-19	4.9257	6.8853e-29
548.83	0.0075398	878.13	0.004616	1097.7	0.0011004						2.488	1.297e-10	3.9809	3.3303e-19	4.9762	7.7264e-29
557.3	0.0074416	891.68	0.0045872	1114.6	0.001104						2.5135	1.3472e-10	4.0217	3.5934e-19	5.0272	8.6703e-29
565.9	0.0076659	905.44	0.0048963	1131.8	0.0008843						2.5393	1.3993e-10	4.0629	3.8773e-19	5.0787	9.7295e-29
574.63	0.0080853	919.41	0.0051706	1149.3	0.00061723						2.5653	1.4535e-10	4.1045	4.1835e-19	5.1307	1.0918e-28
583.49	0.0084478	933.58	0.005084	1167	0.00083331						2.5916	1.5098e-10	4.1466	4.514e-19	5.1833	1.2252e-28
592.48	0.0084248	947.97	0.0055087	1185	0.0011368						2.6181	1.5683e-10	4.1891	4.8705e-19	5.2364	1.3748e-28
601.61	0.0088115	962.58	0.0058587	1203.2	0.0008673						2.645	1.629e-10	4.232	5.2552e-19	5.2901	1.5428e-28
610.88	0.0089315	977.41	0.0059526	1221.8	0.00084909						2.6721	1.6921e-10	4.2754	5.6703e-19	5.3443	1.7312e-28
620.29	0.0091292	992.46	0.0065192	1240.6	0.0010822						2.6994	1.7576e-10	4.3192	6.1181e-19	5.399	1.9427e-28
629.84	0.0097232	1007.7	0.0063436	1259.7	0.0012849						2.7271	1.8257e-10	4.3634	6.6013e-19	5.4544	2.1799e-28
639.53	0.010021	1023.3	0.0065974	1279.1	0.001155						2.7551	1.8964e-10	4.4082	7.1227e-19	5.5103	2.4462e-28
649.37	0.0096044	1039	0.0066611	1298.8	0.0014743						2.7833	1.9698e-10	4.4533	7.6852e-19	5.5667	2.7449e-28
659.36	0.010451	1055	0.0073457	1318.7	0.0012242						2.8118	2.046e-10	4.499	8.2921e-19	5.6238	3.0802e-28
669.5	0.010135	1071.2	0.0077535	1339	0.0013662						2.8406	2.1253e-10	4.5451	8.9469e-19	5.6814	3.4564e-28
679.79	0.010683	1087.7	0.0080169	1359.6	0.0015884						2.8697	2.2075e-10	4.5916	9.6535e-19	5.7396	3.8785e-28
690.24	0.010851	1104.4	0.0084404	1380.5	0.0014172						2.8991	2.293e-10	4.6387	1.0416e-18	5.7984	4.3522e-28
700.85	0.011098	1121.3	0.0085234	1401.7	0.0014949						2.9289	2.3818e-10	4.6862	1.1238e-18	5.8579	4.8837e-28
711.61	0.011361	1138.6	0.0086906	1423.2	0.0017717						2.9589	2.474e-10	4.7342	1.2126e-18	5.9179	5.4801e-28
722.54	0.011571	1156.1	0.0095243	1445.1	0.0018385						2.9892	2.5697e-10	4.7828	1.3083e-18	5.9785	6.1493e-28
733.63	0.011644	1173.8	0.0099237	1467.3	0.002216						3.0198	2.6692e-10	4.8318	1.4116e-18	6.0398	6.9002e-28
744.89	0.011998	1191.8	0.0099658	1489.8	0.0021711						3.0508	2.7725e-10	4.8813	1.5231e-18	6.1017	7.7428e-28
756.32	0.012024	1210.1	0.010467	1512.7	0.0025996						3.082	2.8798e-10	4.9313	1.6433e-18	6.1642	8.6882e-28
767.92	0.012524	1228.7	0.010855	1535.8	0.0025765						3.1136	2.9913e-10	4.9818	1.7731e-18	6.2274	9.7491e-28
779.7	0.012549	1247.5	0.011507	1559.4	0.0024673						3.1455	3.107e-10	5.0329	1.913e-18	6.2912	1.0939e-27
791.66	0.013167	1266.7	0.01199	1583.3	0.0026554						3.1777	3.2273e-10	5.0845	2.0641e-18	6.3557	1.2275e-27
803.79	0.013126	1286.1	0.012141	1607.6	0.0028655						3.2103	3.3522e-10	5.1366	2.227e-18	6.4208	1.3774e-27
816.11	0.013399	1305.8	0.012633	1632.2	0.0029759						3.2432	3.4819e-10	5.1892	2.4028e-18	6.4866	1.5456e-27
828.62	0.013673	1325.8	0.013123	1657.2	0.0034591						3.2764	3.6167e-10	5.2424	2.5925e-18	6.5531	1.7343e-27
841.31	0.01362	1346.1	0.013769	1682.6	0.0037249						3.31	3.7566e-10	5.2961	2.7972e-18	6.6202	1.946e-27
854.2	0.014141	1366.7	0.014477	1708.4	0.0037043						3.3439	3.902e-10	5.3504	3.018e-18	6.6881	2.1836e-27
867.28	0.014078	1387.6	0.015045	1734.6	0.0040891						3.3782	4.053e-10	5.4052	3.2562e-18	6.7566	2.4502e-27
880.55	0.014323	1408.9	0.0155	1761.1	0.0039968						3.4128	4.2098e-10	5.4606	3.5132e-18	6.8258	2.7493e-27
894.03	0.014571	1430.4	0.016189	1788.1	0.0045371						3.4478	4.3727e-10	5.5165	3.7905e-18	6.8958	3.0849e-27
907.71	0.015091	1452.3	0.016656	1815.4	0.0047968						3.4831	4.5418e-10	5.5731	4.0897e-18	6.9664	3.4615e-27
921.6	0.014821	1474.6	0.017106	1843.2	0.0050093						3.5188	4.7175e-10	5.6302	4.4124e-18	7.0378	3.884e-27
935.7	0.01496	1497.1	0.017813	1871.4	0.0055434						3.5549	4.9e-10	5.6879	4.7607e-18	7.1099	4.3581e-27
950.01	0.014734	1520	0.018455	1900	0.0057826						3.5913	5.0896e-10	5.7462	5.1364e-18	7.1828	4.8901e-27
964.53	0.014962	1543.3	0.018939	1929.1	0.0060436						3.6281	5.2865e-10	5.8051	5.5417e-18	7.2564	5.4869e-27
979.28	0.015416	1566.8	0.019583	1958.6	0.0063968						3.6653	5.491e-10	5.8645	5.979e-18	7.3308	6.1566e-27
994.24	0.015142	1590.8	0.020201	1988.5	0.006727						3.7028	5.7034e-10	5.9246	6.4508e-18	7.4059	6.9081e-27
1009.4	0.015047	1615.1	0.020772	2018.9	0.0069844						3.7408	5.924e-10	5.9854	6.9599e-18	7.4818	7.7512e-27
1024.9	0.015264	1639.8	0.021346	2049.7	0.0071798						3.7791	6.1531e-10	6.0467	7.509e-18	7.5585	8.6972e-27
1040.5	0.014971	1664.8	0.022206	2081	0.0076787						3.8179	6.3911e-10	6.1086	8.1015e-18	7.6359	9.7586e-27
1056.4	0.014958	1690.3	0.022417	2112.8	0.0083258						3.857	6.6382e-10	6.1712	8.7407e-18	7.7142	1.095e-26
1072.5	0.015084	1716.1	0.022689	2145.1	0.0087288						3.8965	6.895e-10	6.2345	9.4304e-18	7.7932	1.2286e-26
1088.9	0.014992	1742.3	0.023207	2177.8	0.0092374						3.9364	7.1616e-10	6.2984	1.0174e-17	7.8731	1.3785e-26
1105.5	0.014526	1768.8	0.023705	2211.1	0.0096684						3.9768	7.4385e-10	6.3629	1.0977e-17	7.9537	1.5467e-26
1122.4	0.014665	1795.8	0.024129	2244.8	0.010342						4.0175	7.7262e-10	6.4281	1.1843e-17	8.0353	1.7354e-26
1139.5	0.014533	1823.2	0.024256	2279.1	0.010717						4.0587	8.0249e-10	6.494	1.2777e-17	8.1176	1.9472e-26
1156.9	0.013878	1851.1	0.02487	2313.8	0.011386						4.1003	8.3352e-10	6.5605	1.3785e-17	8.2008	2.1848e-26
1174.6	0.013833	1879.3	0.024988	2349.1	0.011798						4.1423	8.6574e-10	6.6278	1.4873e-17	8.2848	2.4514e-26
1192.5	0.013631	1908	0.025186	2385	0.012595						4.1847	8.9921e-10	6.6957	1.6046e-17	8.3697	2.7504e-26
1210.7	0.013417	1937.1	0.025624	2421.3	0.013211						4.2276	9.3398e-10	6.7643	1.7311e-17	8.4555	3.086e-26
1229.1	0.013247	1966.6	0.025493	2458.2	0.013865						4.271	9.7008e-10	6.8336	1.8677e-17	8.5421	3.4625e-26
1247.9	0.012223	1996.6	0.025346	2495.7	0.014497						4.3147	1.0076e-09	6.9036	2.015e-17	8.6297	3.8849e-26
1266.9	0.012259	2027	0.025361	2533.8	0.015069						4.3589	1.0465e-09	6.9744	2.1739e-17	8.7181	4.3588e-26
1286.2	0.011907	2057.9	0.025019	2572.4	0.015516						4.4036	1.087e-09	7.0459	2.3453e-17	8.8074	4.8906e-26
1305.8	0.011402	2089.3	0.024914	2611.6	0.015773						4.4487	1.129e-09	7.1181	2.5303e-17	8.8977	5.4871e-26
1325.7	0.010973	2121.1	0.024522	2651.4	0.016275						4.4943	1.1726e-09	7.191	2.7298e-17	8.9889	6.1564e-26
1345.9	0.010469	2153.4	0.024446	2691.8	0.016759						4.5404	1.2179e-09	7.2647	2.9451e-17	9.081	6.9074e-26
1366.4	0.010019	2186.2	0.024125	2732.8	0.017258						4.5869	1.265e-09	7.3391	3.1773e-17	9.174	7.7499e-26
1387.2	0.0096468	2219.5	0.023705	2774.4	0.017412						4.6339	1.3139e-09	7.4143	3.4278e-17	9.268	8.6951e-26
1408.3	0.0087097	2253.3	0.023308	2816.6	0.017978						4.6814	1.3647e-09	7.4903	3.6981e-17	9.363	9.7556e-26
1429.8	0.008363	2287.6	0.022759	2859.5	0.018082						4.7294	1.4174e-09	7.5671	3.9896e-17	9.459	1.0945e-25
1451.5	0.0078186	2322.4	0.022243	2903	0.018308						4.7778	1.4722e-09	7.6446	4.3042e-17	9.5559	1.228e-25
1473.6	0.0072864	2357.8	0.021508	2947.2	0.018295						4.8268	1.529e-09	7.723	4.6435e-17	9.6538	1.3778e-25
1496	0.0066996	2393.7	0.020753	2992.1	0.018445						4.8762	1.5881e-09	7.8021	5.0095e-17	9.7527	1.5458e-25
1518.8	0.0062547	2430.1	0.020242	3037.6	0.01842						4.9262	1.6495e-09	7.8821	5.4044e-17	9.8527	1.7343e-25
1541.9	0.005531	2467.1	0.019603	3083.8	0.018223						4.9767	1.7132e-09	7.9628	5.8304e-17	9.9536	1.9457e-25
1565.4	0.0049005	2504.6	0.018772	3130.8	0.018365						5.0277	1.7793e-09	8.0444	6.29e-17	10.056	2.183e-25
1589.2	0.0043198	2542.7	0.017955	3178.4	0.017904						5.0792	1.8481e-09	8.1269	6.7857e-17	10.159	2.4492e-25
1613.4	0.0035173	2581.4	0.016893	3226.7	0.017558						5.1313	1.9194e-09	8.2101	7.3205e-17	10.263	2.7478e-25
1637.9	0.003173	2620.6	0.01642	3275.8	0.017262						5.1838	1.9936e-09	8.2943	7.8975e-17	10.368	3.0828e-25
1662.8	0.0023656	2660.5	0.01543	3325.6	0.016734						5.237	2.0706e-09	8.3793	8.5198e-17	10.474	3.4586e-25
1688.1	0.0017436	2700.9	0.014483	3376.2	0.016222						5.2906	2.1505e-09	8.4651	9.1912e-17	10.582	3.8802e-25
1713.7	0.0012187	2742	0.013437	3427.5	0.015764						5.3449	2.2336e-09	8.5519	9.9154e-17	10.69	4.3532e-25
1739.8	0.00069255	2783.7	0.012839	3479.6	0.015137						5.3996	2.3198e-09	8.6395	1.0697e-16	10.8	4.8839e-25
1766.3	-0.0001379	2826	0.011968	3532.5	0.014459						5.455	2.4094e-09	8.728	1.154e-16	10.91	5.4791e-25
1793.1	-0.00066647	2868.9	0.011162	3586.2	0.013674						5.5109	2.5024e-09	8.8175	1.2449e-16	11.022	6.147e-25
1820.3	-0.0011805	2912.6	0.010857	3640.7	0.012918						5.5673	2.599e-09	8.9078	1.3429e-16	11.135	6.8962e-25
1848	-0.0017515	2956.8	0.010357	3696	0.012261						5.6244	2.6993e-09	8.9991	1.4487e-16	11.249	7.7367e-25
1876.1	-0.0023237	3001.7	0.0098166	3752.2	0.011516						5.682	2.8035e-09	9.0913	1.5629e-16	11.364	8.6795e-25
1904.6	-0.0028026	3047.3	0.0092633	3809.2	0.010709						5.7402	2.9117e-09	9.1845	1.686e-16	11.481	9.7373e-25
1933.5	-0.0034742	3093.6	0.0088494	3867	0.010152						5.7991	3.0241e-09	9.2786	1.8188e-16	11.598	1.0924e-24
1962.9	-0.0039095	3140.6	0.0082251	3925.8	0.0093637						5.8585	3.1408e-09	9.3737	1.962e-16	11.717	1.2255e-24
1992.7	-0.0043229	3188.3	0.007626	3985.4	0.0088915						5.9185	3.262e-09	9.4698	2.1166e-16	11.837	1.3748e-24
2022.9	-0.0046235	3236.7	0.0070726	4045.9	0.0081133						5.9792	3.3879e-09	9.5668	2.2832e-16	11.959	1.5423e-24
2053.7	-0.0052297	3285.9	0.0069751	4107.3	0.0074639						6.0404	3.5187e-09	9.6648	2.4631e-16	12.081	1.7303e-24
2084.9	-0.0055219	3335.8	0.0065529	4169.7	0.0069552						6.1023	3.6544e-09	9.7639	2.657e-16	12.205	1.9411e-24
2116.5	-0.0060189	3386.4	0.006281	4233	0.0064138						6.1649	3.7954e-09	9.8639	2.8662e-16	12.33	2.1775e-24
2148.6	-0.0064226	3437.8	0.0060969	4297.3	0.0059537						6.2281	3.9418e-09	9.965	3.0919e-16	12.456	2.4428e-24
2181.2	-0.0071221	3490	0.0059802	4362.5	0.0054087						6.2919	4.0939e-09	10.067	3.3353e-16	12.584	2.7404e-24
2214.4	-0.0074058	3543	0.0056506	4428.7	0.0051331						6.3564	4.2518e-09	10.17	3.5979e-16	12.713	3.0742e-24
2248	-0.0076289	3596.7	0.0053559	4495.9	0.0046463						6.4215	4.4158e-09	10.275	3.8812e-16	12.843	3.4486e-24
2282.1	-0.008052	3651.3	0.0053366	4564.1	0.0041874						6.4873	4.5861e-09	10.38	4.1867e-16	12.975	3.8686e-24
2316.7	-0.0085963	3706.7	0.005327	4633.4	0.0036715						6.5538	4.763e-09	10.486	4.5162e-16	13.108	4.3398e-24
2351.9	-0.0087903	3763	0.005066	4703.7	0.0034906						6.6209	4.9466e-09	10.594	4.8717e-16	13.242	4.8683e-24
2387.5	-0.0089806	3820.1	0.0049649	4775.1	0.0032661						6.6888	5.1374e-09	10.702	5.2552e-16	13.378	5.4612e-24
2423.8	-0.0093358	3878	0.0048891	4847.5	0.0029808						6.7573	5.3355e-09	10.812	5.6688e-16	13.515	6.1262e-24
2460.5	-0.009611	3936.8	0.0047411	4921	0.0026081						6.8266	5.5412e-09	10.923	6.1149e-16	13.653	6.8721e-24
2497.8	-0.0099881	3996.6	0.0046726	4995.7	0.0022925						6.8965	5.7548e-09	11.035	6.596e-16	13.793	7.7089e-24
2535.7	-0.010026	4057.2	0.0045619	5071.5	0.0021334						6.9672	5.9766e-09	11.148	7.1151e-16	13.935	8.6475e-24
2574.2	-0.01028	4118.7	0.0042539	5148.4	0.0019878						7.0386	6.207e-09	11.262	7.6749e-16	14.078	9.7003e-24
2613.2	-0.01053	4181.1	0.0041577	5226.4	0.0017887						7.1107	6.4463e-09	11.377	8.2787e-16	14.222	1.0881e-23
2652.9	-0.010692	4244.5	0.0039171	5305.7	0.0015423						7.1836	6.6947e-09	11.494	8.93e-16	14.368	1.2206e-23
2693.1	-0.010935	4308.9	0.0039279	5386.1	0.0016527						7.2572	6.9527e-09	11.612	9.6325e-16	14.515	1.3691e-23
2733.9	-0.011065	4374.2	0.0038846	5467.8	0.0015835						7.3316	7.2206e-09	11.731	1.039e-15	14.663	1.5358e-23
2775.4	-0.011135	4440.6	0.0036909	5550.7	0.0014464						7.4067	7.4988e-09	11.851	1.1207e-15	14.814	1.7227e-23
2817.4	-0.011536	4507.9	0.0038112	5634.8	0.001263						7.4826	7.7877e-09	11.972	1.2089e-15	14.966	1.9324e-23
2860.1	-0.011677	4576.2	0.0039267	5720.3	0.0011113						7.5593	8.0878e-09	12.095	1.304e-15	15.119	2.1676e-23
2903.5	-0.011648	4645.6	0.0039592	5807	0.00070463						7.6367	8.3993e-09	12.219	1.4065e-15	15.274	2.4313e-23
2947.5	-0.011905	4716	0.0038666	5895	0.00068157						7.715	8.7228e-09	12.344	1.5171e-15	15.43	2.7272e-23
2992.2	-0.012124	4787.5	0.0038136	5984.3	0.00069978						7.7941	9.0588e-09	12.471	1.6364e-15	15.588	3.059e-23
3037.5	-0.012329	4860	0.0036909	6075	0.00035745						7.8739	9.4077e-09	12.598	1.7651e-15	15.748	3.4312e-23
3083.5	-0.012523			6167.1	0.00035259						7.9546	9.77e-09	12.728	1.9038e-15	15.91	3.8487e-23
3130.2	-0.012784			6260.5	0.00014137						8.0361	1.0146e-08	12.858	2.0535e-15	16.073	4.3169e-23
3177.7	-0.01312			6355.4	8.3096e-05						8.1185	1.0537e-08	12.99	2.2149e-15	16.237	4.8421e-23
3225.8	-0.013464			6451.6	0.00015229						8.2017	1.0943e-08	13.123	2.389e-15	16.404	5.431e-23
3274.7	-0.013614			6549.4	7.217e-05						8.2857	1.1364e-08	13.257	2.5768e-15	16.572	6.0916e-23
3324.3	-0.013751			6648.6	-5.5294e-05						8.3706	1.1801e-08	13.393	2.7793e-15	16.742	6.8325e-23
3374.7	-0.013766			6749.3	-5.2866e-05						8.4564	1.2255e-08	13.53	2.9977e-15	16.913	7.6635e-23
3425.8	-0.013911			6851.6	8.1882e-05						8.5431	1.2727e-08	13.669	3.2333e-15	17.087	8.5954e-23
3477.7	-0.013748			6955.3	5.2747e-05						8.6306	1.3217e-08	13.809	3.4873e-15	17.262	9.6406e-23
3530.3	-0.013853			7060.7	-4.1941e-05						8.719	1.3725e-08	13.951	3.7613e-15	17.438	1.0813e-22
3583.8	-0.014257			7167.6	-0.00017305						8.8084	1.4253e-08	14.094	4.0568e-15	17.617	1.2127e-22
3638.1	-0.014335			7276.2	-0.00014513						8.8987	1.4802e-08	14.238	4.3755e-15	17.798	1.3602e-22
3693.2	-0.014408			7386.3	-0.00024953						8.9898	1.5371e-08	14.384	4.7192e-15	17.98	1.5255e-22
3749.1	-0.014557			7498.2	-0.00020825						9.082	1.5962e-08	14.531	5.0898e-15	18.164	1.711e-22
3805.9	-0.014902			7611.7	-0.00032722						9.175	1.6576e-08	14.68	5.4895e-15	18.35	1.919e-22
3863.5	-0.015033			7727	-0.00037092						9.2691	1.7214e-08	14.831	5.9206e-15	18.539	2.1522e-22
3922	-0.015371			7844	-0.00038791						9.364	1.7876e-08	14.983	6.3855e-15	18.729	2.4138e-22
3981.4	-0.015482			7962.7	-0.00039277						9.46	1.8563e-08	15.136	6.8869e-15	18.92	2.7071e-22
4041.6	-0.015547			8083.3	-0.00031265						9.5569	1.9277e-08	15.291	7.4275e-15	19.114	3.0361e-22
4102.8	-0.015547			8205.6	-0.00037213						9.6549	2.0018e-08	15.448	8.0106e-15	19.31	3.405e-22
4164.9	-0.015959			8329.8	-0.00049474						9.7538	2.0787e-08	15.606	8.6394e-15	19.508	3.8186e-22
4228	-0.01601			8455.9	-0.00062221						9.8538	2.1586e-08	15.766	9.3175e-15	19.708	4.2826e-22
4292	-0.016135			8583.9	-0.00077031						9.9547	2.2416e-08	15.928	1.0049e-14	19.91	4.8028e-22
4356.9	-0.016303			8713.8	-0.00075331						10.057	2.3277e-08	16.091	1.0837e-14	20.114	5.3862e-22
4422.9	-0.016606			8845.7	-0.00087713						10.16	2.4171e-08	16.256	1.1688e-14	20.32	6.0404e-22
4489.8	-0.01665			8979.6	-0.00097911						10.264	2.51e-08	16.422	1.2605e-14	20.528	6.7741e-22
4557.7	-0.01658			9115.5	-0.0010847						10.369	2.6064e-08	16.591	1.3594e-14	20.739	7.5967e-22
4626.7	-0.016747			9253.4	-0.001018						10.475	2.7065e-08	16.761	1.466e-14	20.951	8.5192e-22
4696.7	-0.016799			9393.5	-0.0011199						10.583	2.8104e-08	16.933	1.581e-14	21.166	9.5536e-22
4767.8	-0.016982			9535.6	-0.0010568						10.691	2.9183e-08	17.106	1.705e-14	21.383	1.0713e-21
4839.9	-0.017137			9679.9	-0.00093055						10.801	3.0304e-08	17.281	1.8387e-14	21.602	1.2014e-21
4913.2	-0.017468			9826.3	-0.00092205						10.911	3.1467e-08	17.458	1.9829e-14	21.823	1.3473e-21
5000	-0.017408			10000	-0.00092569						11.023	3.2675e-08	17.637	2.1383e-14	22.047	1.5108e-21
											11.136	3.3929e-08	17.818	2.306e-14	22.273	1.6942e-21
											11.25	3.5231e-08	18.001	2.4868e-14	22.501	1.8998e-21
											11.366	3.6583e-08	18.185	2.6817e-14	22.732	2.1303e-21
											11.482	3.7987e-08	18.371	2.8919e-14	22.965	2.3888e-21
											11.6	3.9444e-08	18.56	3.1185e-14	23.2	2.6786e-21
											11.719	4.0957e-08	18.75	3.3629e-14	23.438	3.0036e-21
											11.839	4.2528e-08	18.942	3.6263e-14	23.678	3.368e-21
											11.96	4.4159e-08	19.136	3.9104e-14	23.92	3.7765e-21
											12.083	4.5852e-08	19.332	4.2168e-14	24.166	4.2345e-21
											12.206	4.761e-08	19.53	4.5471e-14	24.413	4.748e-21
											12.331	4.9435e-08	19.73	4.9032e-14	24.663	5.3238e-21
											12.458	5.133e-08	19.933	5.2871e-14	24.916	5.9693e-21
											12.585	5.3297e-08	20.137	5.7011e-14	25.171	6.693e-21
											12.714	5.5339e-08	20.343	6.1475e-14	25.429	7.5044e-21
											12.845	5.7459e-08	20.552	6.6287e-14	25.69	8.414e-21
											12.976	5.966e-08	20.762	7.1475e-14	25.953	9.4338e-21
											13.109	6.1945e-08	20.975	7.707e-14	26.219	1.0577e-20
											13.244	6.4317e-08	21.19	8.3101e-14	26.488	1.1859e-20
											13.379	6.678e-08	21.407	8.9603e-14	26.759	1.3296e-20
											13.516	6.9337e-08	21.627	9.6613e-14	27.033	1.4907e-20
											13.655	7.1991e-08	21.848	1.0417e-13	27.311	1.6712e-20
											13.795	7.4747e-08	22.072	1.1232e-13	27.59	1.8737e-20
											13.936	7.7607e-08	22.298	1.211e-13	27.873	2.1006e-20
											14.079	8.0576e-08	22.527	1.3057e-13	28.159	2.355e-20
											14.223	8.3659e-08	22.758	1.4078e-13	28.447	2.6402e-20
											14.369	8.6859e-08	22.991	1.5179e-13	28.739	2.9598e-20
											14.516	9.0181e-08	23.226	1.6365e-13	29.033	3.3181e-20
											14.665	9.363e-08	23.464	1.7644e-13	29.331	3.7198e-20
											14.815	9.7209e-08	23.705	1.9023e-13	29.631	4.17e-20
											14.967	1.0092e-07	23.948	2.051e-13	29.935	4.6747e-20
											15.121	1.0478e-07	24.193	2.2112e-13	30.242	5.2403e-20
											15.276	1.0879e-07	24.441	2.3839e-13	30.552	5.8744e-20
											15.432	1.1294e-07	24.692	2.5701e-13	30.865	6.5851e-20
											15.59	1.1726e-07	24.945	2.7708e-13	31.181	7.3816e-20
											15.75	1.2174e-07	25.2	2.9872e-13	31.501	8.2744e-20
											15.911	1.2639e-07	25.458	3.2204e-13	31.823	9.2751e-20
											16.074	1.3121e-07	25.719	3.4718e-13	32.149	1.0397e-19
											16.239	1.3622e-07	25.983	3.7427e-13	32.479	1.1654e-19
											16.406	1.4142e-07	26.249	4.0348e-13	32.812	1.3062e-19
											16.574	1.4682e-07	26.518	4.3496e-13	33.148	1.4641e-19
											16.743	1.5242e-07	26.79	4.689e-13	33.488	1.6411e-19
											16.915	1.5823e-07	27.064	5.0547e-13	33.831	1.8394e-19
											17.088	1.6427e-07	27.342	5.449e-13	34.178	2.0616e-19
											17.264	1.7053e-07	27.622	5.8739e-13	34.528	2.3107e-19
											17.44	1.7704e-07	27.905	6.3318e-13	34.882	2.5899e-19
											17.619	1.8378e-07	28.191	6.8254e-13	35.239	2.9026e-19
											17.8	1.9079e-07	28.48	7.3574e-13	35.6	3.2532e-19
											17.982	1.9806e-07	28.772	7.9308e-13	35.965	3.646e-19
											18.166	2.056e-07	29.067	8.5487e-13	36.333	4.0861e-19
											18.353	2.1344e-07	29.364	9.2147e-13	36.706	4.5794e-19
											18.541	2.2156e-07	29.665	9.9324e-13	37.082	5.1321e-19
											18.731	2.3e-07	29.969	1.0706e-12	37.462	5.7514e-19
											18.923	2.3876e-07	30.276	1.154e-12	37.846	6.4454e-19
											19.116	2.4784e-07	30.587	1.2438e-12	38.234	7.223e-19
											19.312	2.5727e-07	30.9	1.3406e-12	38.625	8.0943e-19
											19.51	2.6706e-07	31.217	1.4449e-12	39.021	9.0705e-19
											19.71	2.7722e-07	31.537	1.5574e-12	39.421	1.0164e-18
											19.912	2.8776e-07	31.86	1.6785e-12	39.825	1.139e-18
											20.116	2.987e-07	32.186	1.8091e-12	40.233	1.2763e-18
											20.322	3.1006e-07	32.516	1.9498e-12	40.645	1.4301e-18
											20.531	3.2184e-07	32.849	2.1014e-12	41.062	1.6024e-18
											20.741	3.3407e-07	33.186	2.2647e-12	41.483	1.7955e-18
											20.954	3.4676e-07	33.526	2.4408e-12	41.908	2.0119e-18
											21.168	3.5993e-07	33.87	2.6304e-12	42.337	2.2542e-18
											21.385	3.7359e-07	34.217	2.8348e-12	42.771	2.5257e-18
											21.604	3.8778e-07	34.567	3.055e-12	43.209	2.8298e-18
											21.826	4.0249e-07	34.921	3.2923e-12	43.652	3.1705e-18
											22.049	4.1776e-07	35.279	3.5479e-12	44.1	3.5521e-18
											22.275	4.3361e-07	35.641	3.8234e-12	44.551	3.9796e-18
											22.504	4.5005e-07	36.006	4.1201e-12	45.008	4.4585e-18
											22.734	4.6712e-07	36.375	4.4399e-12	45.469	4.9949e-18
											22.967	4.8482e-07	36.748	4.7844e-12	45.935	5.5958e-18
											23.202	5.032e-07	37.124	5.1555e-12	46.406	6.2688e-18
											23.44	5.2226e-07	37.505	5.5553e-12	46.881	7.0226e-18
											23.68	5.4204e-07	37.889	5.9861e-12	47.362	7.8669e-18
											23.923	5.6257e-07	38.277	6.4501e-12	47.847	8.8125e-18
											24.168	5.8386e-07	38.67	6.95e-12	48.338	9.8716e-18
											24.416	6.0596e-07	39.066	7.4886e-12	48.833	1.1058e-17
											24.666	6.2889e-07	39.466	8.0687e-12	49.333	1.2386e-17
											24.919	6.5268e-07	39.871	8.6937e-12	49.839	1.3874e-17
											25.174	6.7736e-07	40.279	9.3669e-12	50.35	1.554e-17
											25.432	7.0297e-07	40.692	1.0092e-11	50.865	1.7406e-17
											25.693	7.2954e-07	41.109	1.0873e-11	51.387	1.9495e-17
											25.956	7.571e-07	41.53	1.1715e-11	51.913	2.1835e-17
											26.222	7.857e-07	41.956	1.2621e-11	52.445	2.4455e-17
											26.491	8.1537e-07	42.386	1.3597e-11	52.983	2.7389e-17
											26.762	8.4616e-07	42.82	1.4648e-11	53.526	3.0674e-17
											27.037	8.7809e-07	43.259	1.5781e-11	54.074	3.4352e-17
											27.314	9.1122e-07	43.702	1.7e-11	54.628	3.8471e-17
											27.594	9.4559e-07	44.15	1.8314e-11	55.188	4.3082e-17
											27.876	9.8125e-07	44.602	1.9729e-11	55.754	4.8245e-17
											28.162	1.0182e-06	45.06	2.1252e-11	56.325	5.4025e-17
											28.451	1.0566e-06	45.521	2.2893e-11	56.902	6.0497e-17
											28.742	1.0964e-06	45.988	2.466e-11	57.485	6.7742e-17
											29.037	1.1377e-06	46.459	2.6564e-11	58.074	7.5854e-17
											29.334	1.1805e-06	46.935	2.8613e-11	58.669	8.4934e-17
											29.635	1.225e-06	47.416	3.082e-11	59.271	9.5099e-17
											29.938	1.2711e-06	47.902	3.3196e-11	59.878	1.0648e-16
											30.245	1.3189e-06	48.393	3.5755e-11	60.492	1.1922e-16
											30.555	1.3685e-06	48.889	3.8511e-11	61.111	1.3347e-16
											30.868	1.4199e-06	49.39	4.1478e-11	61.738	1.4943e-16
											31.185	1.4732e-06	49.896	4.4673e-11	62.37	1.673e-16
											31.504	1.5286e-06	50.407	4.8113e-11	63.009	1.8729e-16
											31.827	1.586e-06	50.924	5.1816e-11	63.655	2.0967e-16
											32.153	1.6455e-06	51.446	5.5804e-11	64.307	2.3471e-16
											32.483	1.7073e-06	51.973	6.0097e-11	64.966	2.6274e-16
											32.815	1.7713e-06	52.505	6.4719e-11	65.632	2.9411e-16
											33.152	1.8377e-06	53.043	6.9695e-11	66.305	3.2921e-16
											33.491	1.9066e-06	53.587	7.5052e-11	66.984	3.685e-16
											33.835	1.978e-06	54.136	8.0819e-11	67.671	4.1246e-16
											34.181	2.0521e-06	54.691	8.7028e-11	68.364	4.6165e-16
											34.532	2.1289e-06	55.251	9.3711e-11	69.065	5.167e-16
											34.886	2.2086e-06	55.817	1.009e-10	69.772	5.7829e-16
											35.243	2.2912e-06	56.389	1.0865e-10	70.487	6.472e-16
											35.604	2.3769e-06	56.967	1.1698e-10	71.21	7.2431e-16
											35.969	2.4658e-06	57.551	1.2596e-10	71.939	8.1057e-16
											36.338	2.5579e-06	58.141	1.3561e-10	72.677	9.0709e-16
											36.71	2.6535e-06	58.737	1.4601e-10	73.421	1.0151e-15
											37.086	2.7526e-06	59.338	1.5719e-10	74.174	1.1359e-15
											37.466	2.8553e-06	59.947	1.6923e-10	74.934	1.271e-15
											37.85	2.9618e-06	60.561	1.8219e-10	75.702	1.4221e-15
											38.238	3.0723e-06	61.181	1.9614e-10	76.477	1.5912e-15
											38.63	3.1868e-06	61.808	2.1114e-10	77.261	1.7804e-15
											39.026	3.3055e-06	62.442	2.2729e-10	78.053	1.9919e-15
											39.426	3.4286e-06	63.082	2.4467e-10	78.853	2.2285e-15
											39.83	3.5563e-06	63.728	2.6337e-10	79.661	2.4932e-15
											40.238	3.6886e-06	64.381	2.8349e-10	80.477	2.7891e-15
											40.65	3.8258e-06	65.041	3.0514e-10	81.302	3.1202e-15
											41.067	3.968e-06	65.707	3.2844e-10	82.135	3.4903e-15
											41.488	4.1155e-06	66.381	3.5351e-10	82.977	3.9043e-15
											41.913	4.2683e-06	67.061	3.8047e-10	83.827	4.3672e-15
											42.342	4.4268e-06	67.748	4.0949e-10	84.686	4.8848e-15
											42.776	4.5911e-06	68.442	4.407e-10	85.554	5.4635e-15
											43.214	4.7614e-06	69.144	4.7428e-10	86.43	6.1106e-15
											43.657	4.9379e-06	69.852	5.1041e-10	87.316	6.8341e-15
											44.105	5.1209e-06	70.568	5.4927e-10	88.211	7.643e-15
											44.557	5.3105e-06	71.291	5.9107e-10	89.115	8.5474e-15
											45.013	5.5071e-06	72.022	6.3604e-10	90.028	9.5583e-15
											45.474	5.7109e-06	72.76	6.844e-10	90.95	1.0689e-14
											45.94	5.9221e-06	73.505	7.3642e-10	91.882	1.1952e-14
											46.411	6.141e-06	74.259	7.9238e-10	92.824	1.3364e-14
											46.887	6.3678e-06	75.02	8.5256e-10	93.775	1.4942e-14
											47.367	6.603e-06	75.788	9.1727e-10	94.736	1.6706e-14
											47.853	6.8467e-06	76.565	9.8688e-10	95.707	1.8678e-14
											48.343	7.0992e-06	77.35	1.0617e-09	96.688	2.0882e-14
											48.838	7.3609e-06	78.142	1.1422e-09	97.679	2.3344e-14
											49.339	7.6321e-06	78.943	1.2288e-09	98.68	2.6096e-14
											49.845	7.9132e-06	79.752	1.3218e-09	99.691	2.9171e-14
											50.355	8.2044e-06	80.569	1.4219e-09	100.71	3.2607e-14
											50.871	8.5062e-06	81.395	1.5295e-09	101.74	3.6447e-14
											51.393	8.8189e-06	82.229	1.6452e-09	102.79	4.0736e-14
											51.919	9.1429e-06	83.072	1.7696e-09	103.84	4.5529e-14
											52.451	9.4787e-06	83.923	1.9033e-09	104.9	5.0883e-14
											52.989	9.8265e-06	84.783	2.0471e-09	105.98	5.6864e-14
											53.532	1.0187e-05	85.652	2.2016e-09	107.07	6.3546e-14
											54.08	1.056e-05	86.529	2.3677e-09	108.16	7.101e-14
											54.635	1.0947e-05	87.416	2.5463e-09	109.27	7.9346e-14
											55.194	1.1348e-05	88.312	2.7382e-09	110.39	8.8658e-14
											55.76	1.1763e-05	89.217	2.9445e-09	111.52	9.9057e-14
											56.331	1.2193e-05	90.131	3.1662e-09	112.66	1.1067e-13
											56.909	1.2639e-05	91.055	3.4045e-09	113.82	1.2364e-13
											57.492	1.31e-05	91.988	3.6606e-09	114.99	1.3812e-13
											58.081	1.3578e-05	92.93	3.9358e-09	116.16	1.543e-13
											58.676	1.4074e-05	93.883	4.2316e-09	117.35	1.7236e-13
											59.277	1.4586e-05	94.845	4.5494e-09	118.56	1.9252e-13
											59.885	1.5118e-05	95.817	4.8908e-09	119.77	2.1503e-13
											60.499	1.5668e-05	96.799	5.2577e-09	121	2.4016e-13
											61.119	1.6238e-05	97.79	5.6519e-09	122.24	2.6821e-13
											61.745	1.6828e-05	98.793	6.0754e-09	123.49	2.9953e-13
											62.378	1.7439e-05	99.805	6.5304e-09	124.76	3.3448e-13
											63.017	1.8072e-05	100.83	7.0191e-09	126.04	3.7349e-13
											63.663	1.8728e-05	101.86	7.5441e-09	127.33	4.1704e-13
											64.315	1.9406e-05	102.9	8.1081e-09	128.63	4.6563e-13
											64.974	2.0109e-05	103.96	8.7138e-09	129.95	5.1986e-13
											65.64	2.0837e-05	105.02	9.3644e-09	131.28	5.8037e-13
											66.312	2.1591e-05	106.1	1.0063e-08	132.63	6.4789e-13
											66.992	2.2371e-05	107.19	1.0814e-08	133.99	7.2322e-13
											67.678	2.3179e-05	108.29	1.162e-08	135.36	8.0727e-13
											68.372	2.4015e-05	109.4	1.2485e-08	136.75	9.0104e-13
											69.073	2.4881e-05	110.52	1.3414e-08	138.15	1.0056e-12
											69.78	2.5777e-05	111.65	1.4412e-08	139.56	1.1223e-12
											70.496	2.6705e-05	112.79	1.5483e-08	140.99	1.2525e-12
											71.218	2.7665e-05	113.95	1.6633e-08	142.44	1.3976e-12
											71.948	2.866e-05	115.12	1.7868e-08	143.9	1.5595e-12
											72.685	2.9689e-05	116.3	1.9194e-08	145.37	1.74e-12
											73.43	3.0754e-05	117.49	2.0616e-08	146.86	1.9413e-12
											74.182	3.1856e-05	118.69	2.2144e-08	148.37	2.1658e-12
											74.943	3.2997e-05	119.91	2.3783e-08	149.89	2.4161e-12
											75.711	3.4178e-05	121.14	2.5542e-08	151.42	2.6951e-12
											76.486	3.54e-05	122.38	2.743e-08	152.98	3.0061e-12
											77.27	3.6665e-05	123.63	2.9457e-08	154.54	3.3529e-12
											78.062	3.7973e-05	124.9	3.1631e-08	156.13	3.7394e-12
											78.862	3.9328e-05	126.18	3.3964e-08	157.73	4.1701e-12
											79.67	4.0729e-05	127.47	3.6468e-08	159.34	4.6502e-12
											80.486	4.2178e-05	128.78	3.9153e-08	160.98	5.1852e-12
											81.311	4.3678e-05	130.1	4.2035e-08	162.62	5.7814e-12
											82.144	4.523e-05	131.43	4.5126e-08	164.29	6.4457e-12
											82.986	4.6835e-05	132.78	4.8442e-08	165.97	7.1859e-12
											83.837	4.8496e-05	134.14	5.1998e-08	167.68	8.0104e-12
											84.696	5.0214e-05	135.51	5.5813e-08	169.39	8.929e-12
											85.564	5.1991e-05	136.9	5.9904e-08	171.13	9.9522e-12
											86.44	5.3829e-05	138.31	6.4292e-08	172.88	1.1092e-11
											87.326	5.5731e-05	139.72	6.8997e-08	174.66	1.2361e-11
											88.221	5.7697e-05	141.15	7.4042e-08	176.44	1.3774e-11
											89.125	5.9731e-05	142.6	7.9452e-08	178.25	1.5349e-11
											90.039	6.1834e-05	144.06	8.5252e-08	180.08	1.7101e-11
											90.961	6.4009e-05	145.54	9.147e-08	181.93	1.9052e-11
											91.893	6.6258e-05	147.03	9.8135e-08	183.79	2.1225e-11
											92.835	6.8584e-05	148.54	1.0528e-07	185.67	2.3643e-11
											93.786	7.0988e-05	150.06	1.1294e-07	187.58	2.6335e-11
											94.747	7.3474e-05	151.6	1.2115e-07	189.5	2.933e-11
											95.718	7.6045e-05	153.15	1.2994e-07	191.44	3.2664e-11
											96.699	7.8702e-05	154.72	1.3937e-07	193.4	3.6374e-11
											97.69	8.1449e-05	156.31	1.4947e-07	195.38	4.0503e-11
											98.691	8.4288e-05	157.91	1.603e-07	197.39	4.5096e-11
											99.702	8.7224e-05	159.53	1.7189e-07	199.41	5.0205e-11
											100.72	9.0258e-05	161.16	1.8431e-07	201.45	5.5889e-11
											101.76	9.3393e-05	162.81	1.9762e-07	203.52	6.2212e-11
											102.8	9.6634e-05	164.48	2.1188e-07	205.6	6.9243e-11
											103.85	9.9983e-05	166.17	2.2714e-07	207.71	7.7064e-11
											104.92	0.00010344	167.87	2.435e-07	209.84	8.5759e-11
											105.99	0.00010702	169.59	2.61e-07	211.99	9.5428e-11
											107.08	0.00011072	171.33	2.7975e-07	214.16	1.0618e-10
											108.18	0.00011453	173.08	2.9983e-07	216.35	1.1813e-10
											109.28	0.00011848	174.86	3.2133e-07	218.57	1.3141e-10
											110.4	0.00012255	176.65	3.4434e-07	220.81	1.4617e-10
											111.54	0.00012676	178.46	3.6897e-07	223.07	1.6258e-10
											112.68	0.00013111	180.29	3.9534e-07	225.36	1.8081e-10
											113.83	0.0001356	182.13	4.2356e-07	227.67	2.0106e-10
											115	0.00014024	184	4.5376e-07	230	2.2357e-10
											116.18	0.00014503	185.89	4.8607e-07	232.36	2.4857e-10
											117.37	0.00014998	187.79	5.2065e-07	234.74	2.7634e-10
											118.57	0.00015509	189.71	5.5765e-07	237.15	3.0718e-10
											119.79	0.00016036	191.66	5.9723e-07	239.58	3.4142e-10
											121.01	0.00016581	193.62	6.3957e-07	242.03	3.7945e-10
											122.25	0.00017143	195.61	6.8485e-07	244.51	4.2167e-10
											123.51	0.00017724	197.61	7.3329e-07	247.02	4.6854e-10
											124.77	0.00018323	199.64	7.8509e-07	249.55	5.2057e-10
											126.05	0.00018942	201.68	8.4047e-07	252.1	5.7832e-10
											127.34	0.00019581	203.75	8.997e-07	254.69	6.424e-10
											128.65	0.0002024	205.84	9.6301e-07	257.3	7.1351e-10
											129.97	0.0002092	207.95	1.0307e-06	259.93	7.9241e-10
											131.3	0.00021622	210.08	1.103e-06	262.6	8.7993e-10
											132.64	0.00022347	212.23	1.1804e-06	265.29	9.7702e-10
											134	0.00023094	214.4	1.263e-06	268.01	1.0847e-09
											135.38	0.00023865	216.6	1.3513e-06	270.75	1.2041e-09
											136.76	0.00024661	218.82	1.4457e-06	273.53	1.3365e-09
											138.16	0.00025482	221.06	1.5465e-06	276.33	1.4833e-09
											139.58	0.00026328	223.33	1.6542e-06	279.16	1.646e-09
											141.01	0.00027201	225.62	1.7692e-06	282.02	1.8264e-09
											142.46	0.00028102	227.93	1.8921e-06	284.91	2.0263e-09
											143.91	0.00029031	230.27	2.0232e-06	287.83	2.2478e-09
											145.39	0.00029989	232.62	2.1633e-06	290.78	2.4932e-09
											146.88	0.00030976	235.01	2.3129e-06	293.76	2.7651e-09
											148.38	0.00031994	237.42	2.4726e-06	296.77	3.0663e-09
											149.91	0.00033044	239.85	2.643e-06	299.81	3.3998e-09
											151.44	0.00034126	242.31	2.8249e-06	302.89	3.7691e-09
											152.99	0.00035242	244.79	3.0191e-06	305.99	4.1781e-09
											154.56	0.00036392	247.3	3.2263e-06	309.13	4.6308e-09
											156.14	0.00037576	249.83	3.4473e-06	312.29	5.1319e-09
											157.75	0.00038798	252.39	3.6831e-06	315.49	5.6865e-09
											159.36	0.00040056	254.98	3.9347e-06	318.73	6.3003e-09
											160.99	0.00041352	257.59	4.203e-06	321.99	6.9793e-09
											162.64	0.00042688	260.23	4.4891e-06	325.29	7.7305e-09
											164.31	0.00044064	262.9	4.7941e-06	328.63	8.5614e-09
											165.99	0.00045481	265.59	5.1194e-06	331.99	9.4802e-09
											167.7	0.00046941	268.32	5.4662e-06	335.4	1.0496e-08
											169.41	0.00048445	271.06	5.8358e-06	338.83	1.162e-08
											171.15	0.00049993	273.84	6.2297e-06	342.3	1.2861e-08
											172.9	0.00051587	276.65	6.6495e-06	345.81	1.4234e-08
											174.68	0.00053228	279.48	7.0967e-06	349.36	1.575e-08
											176.47	0.00054918	282.35	7.5732e-06	352.94	1.7426e-08
											178.27	0.00056658	285.24	8.0808e-06	356.55	1.9277e-08
											180.1	0.00058448	288.16	8.6213e-06	360.21	2.1322e-08
											181.95	0.00060291	291.12	9.197e-06	363.9	2.358e-08
											183.81	0.00062187	294.1	9.8099e-06	367.63	2.6073e-08
											185.69	0.00064138	297.11	1.0462e-05	371.39	2.8825e-08
											187.6	0.00066146	300.16	1.1157e-05	375.2	3.1863e-08
											189.52	0.00068211	303.23	1.1896e-05	379.04	3.5215e-08
											191.46	0.00070336	306.34	1.2683e-05	382.93	3.8915e-08
											193.42	0.00072521	309.48	1.352e-05	386.85	4.2995e-08
											195.41	0.00074768	312.65	1.4411e-05	390.82	4.7497e-08
											197.41	0.00077079	315.86	1.5358e-05	394.82	5.2461e-08
											199.43	0.00079455	319.09	1.6365e-05	398.87	5.7934e-08
											201.48	0.00081897	322.36	1.7437e-05	402.96	6.3967e-08
											203.54	0.00084409	325.67	1.8576e-05	407.08	7.0618e-08
											205.63	0.0008699	329	1.9786e-05	411.26	7.7946e-08
											207.73	0.00089642	332.37	2.1073e-05	415.47	8.602e-08
											209.86	0.00092368	335.78	2.2441e-05	419.73	9.4915e-08
											212.01	0.00095169	339.22	2.3894e-05	424.03	1.0471e-07
											214.18	0.00098046	342.7	2.5437e-05	428.37	1.155e-07
											216.38	0.00101	346.21	2.7077e-05	432.76	1.2737e-07
											218.6	0.0010404	349.76	2.8818e-05	437.2	1.4044e-07
											220.84	0.0010716	353.34	3.0667e-05	441.68	1.5483e-07
											223.1	0.0011036	356.96	3.263e-05	446.21	1.7065e-07
											225.39	0.0011364	360.62	3.4714e-05	450.78	1.8806e-07
											227.7	0.0011702	364.32	3.6925e-05	455.4	2.072e-07
											230.03	0.0012048	368.05	3.9271e-05	460.06	2.2826e-07
											232.39	0.0012404	371.82	4.1761e-05	464.78	2.514e-07
											234.77	0.0012769	375.63	4.4401e-05	469.54	2.7683e-07
											237.17	0.0013143	379.48	4.7201e-05	474.35	3.0478e-07
											239.6	0.0013527	383.37	5.017e-05	479.21	3.3548e-07
											242.06	0.0013921	387.3	5.3318e-05	484.12	3.6921e-07
											244.54	0.0014325	391.27	5.6654e-05	489.09	4.0624e-07
											247.05	0.0014739	395.28	6.0189e-05	494.1	4.469e-07
											249.58	0.0015164	399.33	6.3935e-05	499.16	4.9152e-07
											252.13	0.0015599	403.42	6.7903e-05	504.28	5.4049e-07
											254.72	0.0016045	407.55	7.2106e-05	509.44	5.9422e-07
											257.33	0.0016503	411.73	7.6556e-05	514.66	6.5314e-07
											259.97	0.0016971	415.95	8.1268e-05	519.94	7.1776e-07
											262.63	0.0017452	420.21	8.6255e-05	525.27	7.886e-07
											265.32	0.0017944	424.52	9.1532e-05	530.65	8.6624e-07
											268.04	0.0018447	428.87	9.7116e-05	536.09	9.5132e-07
											270.79	0.0018963	433.26	0.00010302	541.58	1.0445e-06
											273.56	0.0019491	437.7	0.00010927	547.13	1.1466e-06
											276.37	0.0020032	442.19	0.00011588	552.74	1.2584e-06
											279.2	0.0020586	446.72	0.00012286	558.4	1.3807e-06
											282.06	0.0021152	451.3	0.00013024	564.12	1.5146e-06
											284.95	0.0021732	455.92	0.00013804	569.9	1.6611e-06
											287.87	0.0022325	460.59	0.00014627	575.74	1.8213e-06
											290.82	0.0022931	465.31	0.00015498	581.64	1.9965e-06
											293.8	0.0023551	470.08	0.00016417	587.6	2.188e-06
											296.81	0.0024185	474.9	0.00017387	593.62	2.3973e-06
											299.85	0.0024833	479.76	0.0001841	599.71	2.626e-06
											302.92	0.0025496	484.68	0.00019491	605.85	2.8758e-06
											306.03	0.0026173	489.65	0.00020631	612.06	3.1486e-06
											309.16	0.0026864	494.66	0.00021833	618.33	3.4464e-06
											312.33	0.0027571	499.73	0.00023101	624.67	3.7713e-06
											315.53	0.0028293	504.85	0.00024437	631.07	4.1259e-06
											318.77	0.0029029	510.03	0.00025845	637.54	4.5125e-06
											322.03	0.0029781	515.25	0.00027329	644.07	4.9342e-06
											325.33	0.0030549	520.53	0.00028893	650.67	5.3938e-06
											328.67	0.0031333	525.87	0.00030539	657.34	5.8946e-06
											332.03	0.0032132	531.26	0.00032272	664.08	6.4402e-06
											335.44	0.0032947	536.7	0.00034097	670.88	7.0343e-06
											338.87	0.0033778	542.2	0.00036017	677.76	7.6811e-06
											342.35	0.0034626	547.76	0.00038036	684.7	8.3851e-06
											345.85	0.003549	553.37	0.00040161	691.72	9.151e-06
											349.4	0.003637	559.04	0.00042394	698.8	9.9839e-06
											352.98	0.0037268	564.77	0.00044742	705.97	1.089e-05
											356.6	0.0038181	570.56	0.00047209	713.2	1.1874e-05
											360.25	0.0039112	576.4	0.000498	720.51	1.2944e-05
											363.94	0.0040059	582.31	0.00052522	727.89	1.4105e-05
											367.67	0.0041024	588.28	0.0005538	735.35	1.5366e-05
											371.44	0.0042005	594.31	0.00058379	742.89	1.6735e-05
											375.25	0.0043004	600.4	0.00061527	750.5	1.8221e-05
											379.09	0.0044019	606.55	0.00064828	758.19	1.9832e-05
											382.98	0.0045052	612.76	0.0006829	765.96	2.1579e-05
											386.9	0.0046101	619.04	0.00071919	773.81	2.3472e-05
											390.87	0.0047168	625.39	0.00075723	781.74	2.5523e-05
											394.87	0.0048252	631.8	0.00079708	789.75	2.7745e-05
											398.92	0.0049353	638.27	0.00083882	797.84	3.015e-05
											403.01	0.0050471	644.81	0.00088251	806.02	3.2753e-05
											407.13	0.0051605	651.42	0.00092825	814.28	3.5569e-05
											411.31	0.0052757	658.09	0.00097609	822.62	3.8613e-05
											415.52	0.0053925	664.84	0.0010261	831.05	4.1905e-05
											419.78	0.005511	671.65	0.0010785	839.57	4.5461e-05
											424.08	0.0056311	678.53	0.0011332	848.17	4.9302e-05
											428.43	0.0057529	685.49	0.0011903	856.86	5.3449e-05
											432.82	0.0058762	692.51	0.00125	865.64	5.7924e-05
											437.25	0.0060012	699.61	0.0013123	874.51	6.2752e-05
											441.73	0.0061277	706.78	0.0013774	883.48	6.7958e-05
											446.26	0.0062558	714.02	0.0014452	892.53	7.3569e-05
											450.83	0.0063853	721.34	0.001516	901.67	7.9613e-05
											455.45	0.0065164	728.73	0.0015898	910.91	8.6123e-05
											460.12	0.0066489	736.2	0.0016667	920.25	9.313e-05
											464.84	0.0067828	743.74	0.0017468	929.68	0.00010067
											469.6	0.0069182	751.36	0.0018302	939.21	0.00010878
											474.41	0.0070548	759.06	0.0019171	948.83	0.00011749
											479.27	0.0071928	766.84	0.0020074	958.55	0.00012686
											484.18	0.007332	774.7	0.0021014	968.38	0.00013691
											489.15	0.0074725	782.64	0.0021991	978.3	0.00014771
											494.16	0.007614	790.66	0.0023006	988.32	0.00015929
											499.22	0.0077568	798.76	0.0024061	998.45	0.00017171
											504.34	0.0079005	806.94	0.0025156	1008.7	0.00018503
											509.51	0.0080453	815.21	0.0026292	1019	0.00019929
											514.73	0.0081909	823.57	0.0027471	1029.5	0.00021456
											520	0.0083375	832.01	0.0028693	1040	0.00023091
											525.33	0.0084848	840.53	0.002996	1050.7	0.0002484
											530.71	0.0086329	849.15	0.0031273	1061.4	0.00026709
											536.15	0.0087817	857.85	0.0032632	1072.3	0.00028707
											541.65	0.008931	866.64	0.0034039	1083.3	0.00030841
											547.2	0.0090808	875.52	0.0035494	1094.4	0.00033119
											552.8	0.009231	884.49	0.0036999	1105.6	0.00035549
											558.47	0.0093815	893.55	0.0038554	1116.9	0.0003814
											564.19	0.0095323	902.71	0.0040161	1128.4	0.00040901
											569.97	0.0096832	911.96	0.0041819	1140	0.00043842
											575.81	0.0098342	921.31	0.0043531	1151.6	0.00046972
											581.72	0.0099851	930.75	0.0045296	1163.4	0.00050303
											587.68	0.010136	940.29	0.0047115	1175.4	0.00053844
											593.7	0.010286	949.92	0.004899	1187.4	0.00057606
											599.78	0.010437	959.66	0.005092	1199.6	0.00061602
											605.93	0.010586	969.49	0.0052906	1211.9	0.00065842
											612.14	0.010735	979.42	0.0054949	1224.3	0.0007034
											618.41	0.010883	989.46	0.0057049	1236.8	0.00075107
											624.75	0.011031	999.6	0.0059206	1249.5	0.00080157
											631.15	0.011177	1009.8	0.0061421	1262.3	0.00085503
											637.62	0.011323	1020.2	0.0063694	1275.2	0.00091159
											644.15	0.011467	1030.6	0.0066024	1288.3	0.00097138
											650.75	0.01161	1041.2	0.0068413	1301.5	0.0010346
											657.42	0.011751	1051.9	0.0070858	1314.9	0.0011013
											664.16	0.011891	1062.7	0.0073362	1328.3	0.0011716
											670.96	0.012029	1073.5	0.0075922	1341.9	0.0012458
											677.84	0.012165	1084.5	0.0078539	1355.7	0.001324
											684.79	0.012299	1095.7	0.0081211	1369.6	0.0014063
											691.8	0.01243	1106.9	0.0083939	1383.6	0.0014929
											698.89	0.01256	1118.2	0.0086722	1397.8	0.0015839
											706.05	0.012686	1129.7	0.0089557	1412.1	0.0016795
											713.29	0.01281	1141.3	0.0092445	1426.6	0.0017799
											720.6	0.012932	1153	0.0095384	1441.2	0.0018852
											727.98	0.01305	1164.8	0.0098373	1456	0.0019956
											735.44	0.013165	1176.7	0.010141	1470.9	0.0021111
											742.98	0.013277	1188.8	0.010449	1486	0.0022321
											750.59	0.013385	1201	0.010762	1501.2	0.0023585
											758.28	0.01349	1213.3	0.011079	1516.6	0.0024906
											766.06	0.01359	1225.7	0.0114	1532.1	0.0026285
											773.91	0.013687	1238.3	0.011724	1547.8	0.0027723
											781.84	0.01378	1250.9	0.012053	1563.7	0.0029221
											789.85	0.013868	1263.8	0.012384	1579.7	0.0030781
											797.94	0.013952	1276.7	0.012718	1595.9	0.0032404
											806.12	0.014031	1289.8	0.013055	1612.2	0.003409
											814.38	0.014106	1303	0.013395	1628.8	0.003584
											822.72	0.014175	1316.4	0.013736	1645.5	0.0037656
											831.16	0.01424	1329.9	0.014079	1662.3	0.0039537
											839.67	0.014299	1343.5	0.014423	1679.4	0.0041485
											848.28	0.014352	1357.2	0.014768	1696.6	0.0043499
											856.97	0.014401	1371.2	0.015113	1714	0.004558
											865.75	0.014443	1385.2	0.015459	1731.5	0.0047728
											874.62	0.014479	1399.4	0.015804	1749.3	0.0049942
											883.59	0.014509	1413.7	0.016148	1767.2	0.0052222
											892.64	0.014534	1428.2	0.016491	1785.3	0.0054567
											901.79	0.014551	1442.9	0.016831	1803.6	0.0056978
											911.03	0.014563	1457.7	0.01717	1822.1	0.0059451
											920.36	0.014567	1472.6	0.017506	1840.7	0.0061987
											929.8	0.014565	1487.7	0.017838	1859.6	0.0064583
											939.32	0.014556	1502.9	0.018166	1878.7	0.0067238
											948.95	0.01454	1518.3	0.01849	1897.9	0.006995
											958.67	0.014517	1533.9	0.018809	1917.4	0.0072715
											968.5	0.014487	1549.6	0.019123	1937	0.0075533
											978.42	0.014449	1565.5	0.01943	1956.9	0.0078399
											988.45	0.014404	1581.5	0.019731	1976.9	0.008131
											998.58	0.014351	1597.7	0.020024	1997.2	0.0084263
											1008.8	0.014291	1614.1	0.02031	2017.6	0.0087254
											1019.1	0.014223	1630.6	0.020588	2038.3	0.0090278
											1029.6	0.014148	1647.4	0.020856	2059.2	0.0093332
											1040.1	0.014064	1664.2	0.021115	2080.3	0.009641
											1050.8	0.013973	1681.3	0.021364	2101.6	0.0099508
											1061.6	0.013873	1698.5	0.021603	2123.2	0.010262
											1072.4	0.013766	1715.9	0.021831	2144.9	0.010574
											1083.4	0.013651	1733.5	0.022046	2166.9	0.010886
											1094.5	0.013528	1751.3	0.02225	2189.1	0.011198
											1105.8	0.013396	1769.2	0.022441	2211.5	0.011509
											1117.1	0.013257	1787.3	0.02262	2234.2	0.011818
											1128.5	0.013109	1805.7	0.022784	2257.1	0.012125
											1140.1	0.012954	1824.2	0.022935	2280.2	0.012428
											1151.8	0.01279	1842.9	0.023071	2303.6	0.012728
											1163.6	0.012619	1861.7	0.023193	2327.2	0.013023
											1175.5	0.01244	1880.8	0.023299	2351	0.013313
											1187.6	0.012252	1900.1	0.02339	2375.1	0.013597
											1199.7	0.012057	1919.6	0.023465	2399.5	0.013874
											1212	0.011854	1939.2	0.023523	2424.1	0.014143
											1224.4	0.011644	1959.1	0.023566	2448.9	0.014404
											1237	0.011426	1979.2	0.023592	2474	0.014656
											1249.7	0.0112	1999.5	0.023601	2499.3	0.014897
											1262.5	0.010967	2020	0.023593	2525	0.015128
											1275.4	0.010727	2040.7	0.023568	2550.8	0.015347
											1288.5	0.010479	2061.6	0.023526	2577	0.015554
											1301.7	0.010225	2082.7	0.023467	2603.4	0.015748
											1315	0.0099639	2104	0.023391	2630.1	0.015928
											1328.5	0.009696	2125.6	0.023298	2657	0.016094
											1342.1	0.0094216	2147.4	0.023188	2684.2	0.016245
											1355.9	0.0091409	2169.4	0.02306	2711.7	0.01638
											1369.8	0.008854	2191.6	0.022917	2739.5	0.016499
											1383.8	0.0085612	2214.1	0.022756	2767.6	0.016601
											1398	0.0082626	2236.8	0.022579	2796	0.016686
											1412.3	0.0079584	2259.7	0.022386	2824.6	0.016753
											1426.8	0.0076489	2282.8	0.022178	2853.6	0.016803
											1441.4	0.0073343	2306.2	0.021954	2882.8	0.016834
											1456.2	0.0070149	2329.9	0.021715	2912.3	0.016846
											1471.1	0.0066907	2353.7	0.021462	2942.2	0.01684
											1486.2	0.0063622	2377.9	0.021194	2972.3	0.016814
											1501.4	0.0060296	2402.2	0.020914	3002.8	0.01677
											1516.8	0.0056931	2426.8	0.02062	3033.6	0.016706
											1532.3	0.0053529	2451.7	0.020313	3064.6	0.016623
											1548	0.0050094	2476.8	0.019995	3096.1	0.016522
											1563.9	0.0046628	2502.2	0.019665	3127.8	0.016402
											1579.9	0.0043134	2527.9	0.019325	3159.8	0.016263
											1596.1	0.0039615	2553.8	0.018975	3192.2	0.016106
											1612.5	0.0036073	2579.9	0.018615	3224.9	0.015931
											1629	0.0032511	2606.4	0.018247	3258	0.015739
											1645.7	0.0028932	2633.1	0.017871	3291.4	0.01553
											1662.5	0.0025339	2660.1	0.017488	3325.1	0.015304
											1679.6	0.0021736	2687.3	0.017098	3359.2	0.015063
											1696.8	0.0018123	2714.9	0.016703	3393.6	0.014807
											1714.2	0.0014506	2742.7	0.016303	3428.4	0.014537
											1731.7	0.0010885	2770.8	0.015899	3463.5	0.014253
											1749.5	0.00072654	2799.2	0.015491	3499	0.013956
											1767.4	0.00036484	2827.9	0.015081	3534.8	0.013648
											1785.5	3.7205e-06	2856.8	0.014668	3571.1	0.013328
											1803.8	-0.00035654	2886.1	0.014255	3607.7	0.012999
											1822.3	-0.00071566	2915.7	0.013841	3644.6	0.01266
											1841	-0.0010734	2945.6	0.013428	3682	0.012314
											1859.8	-0.0014294	2975.8	0.013015	3719.7	0.01196
											1878.9	-0.0017836	3006.2	0.012604	3757.8	0.0116
											1898.2	-0.0021355	3037.1	0.012195	3796.3	0.011235
											1917.6	-0.002485	3068.2	0.011789	3835.2	0.010866
											1937.3	-0.0028319	3099.6	0.011387	3874.5	0.010494
											1957.1	-0.0031758	3131.4	0.010989	3914.2	0.01012
											1977.2	-0.0035166	3163.5	0.010596	3954.3	0.0097445
											1997.4	-0.003854	3195.9	0.010207	3994.9	0.009369
											2017.9	-0.0041879	3228.6	0.0098251	4035.8	0.0089944
											2038.6	-0.0045179	3261.7	0.009449	4077.2	0.0086214
											2059.5	-0.004844	3295.1	0.0090795	4118.9	0.008251
											2080.6	-0.0051659	3328.9	0.0087171	4161.1	0.007884
											2101.9	-0.0054835	3363	0.0083622	4203.8	0.0075212
											2123.4	-0.0057966	3397.5	0.0080151	4246.9	0.0071634
											2145.2	-0.0061049	3432.3	0.0076761	4290.4	0.0068113
											2167.2	-0.0064084	3467.5	0.0073456	4334.4	0.0064656
											2189.4	-0.006707	3503	0.0070237	4378.8	0.0061269
											2211.8	-0.0070004	3538.9	0.0067107	4423.6	0.0057957
											2234.5	-0.0072886	3575.2	0.0064068	4469	0.0054725
											2257.4	-0.0075715	3611.8	0.006112	4514.8	0.005158
											2280.5	-0.0078489	3648.8	0.0058266	4561	0.0048523
											2303.9	-0.0081207	3686.2	0.0055506	4607.8	0.004556
											2327.5	-0.0083869	3724	0.0052841	4655	0.0042692
											2351.3	-0.0086474	3762.1	0.0050271	4702.7	0.0039924
											2375.4	-0.0089021	3800.7	0.0047795	4750.9	0.0037255
											2399.8	-0.009151	3839.6	0.0045415	4799.6	0.0034689
											2424.4	-0.0093941	3879	0.0043128	4848.7	0.0032226
											2449.2	-0.0096312	3918.7	0.0040936	4898.4	0.0029867
											2474.3	-0.0098624	3958.9	0.0038835	4948.6	0.0027611
											2499.7	-0.010088	3999.5	0.0036826	4999.3	0.0025459
											2525.3	-0.010307	4040.5	0.0034907	5050.6	0.0023409
											2551.2	-0.01052	4081.9	0.0033076	5102.3	0.0021461
											2577.3	-0.010728	4123.7	0.0031332	5154.6	0.0019614
											2603.7	-0.010929	4165.9	0.0029673	5207.4	0.0017864
											2630.4	-0.011125	4208.6	0.0028096	5260.8	0.0016211
											2657.3	-0.011314	4251.8	0.00266	5314.7	0.0014652
											2684.6	-0.011498	4295.3	0.0025183	5369.2	0.0013185
											2712.1	-0.011676	4339.3	0.0023841	5424.2	0.0011806
											2739.9	-0.011848	4383.8	0.0022573	5479.8	0.0010513
											2768	-0.012015	4428.7	0.0021377	5535.9	0.00093035
											2796.3	-0.012176	4474.1	0.0020249	5592.7	0.00081733
											2825	-0.012331	4520	0.0019187	5650	0.00071195
											2853.9	-0.012481	4566.3	0.0018188	5707.9	0.00061389
											2883.2	-0.012626	4613.1	0.0017251	5766.4	0.00052281
											2912.7	-0.012765	4660.4	0.0016372	5825.4	0.00043837
											2942.6	-0.0129	4708.1	0.001555	5885.1	0.00036023
											2972.7	-0.013029	4756.4	0.001478	5945.4	0.00028806
											3003.2	-0.013153	4805.1	0.0014061	6006.4	0.00022152
											3034	-0.013272	4854.3	0.0013391	6067.9	0.0001603
											3065	-0.013386	4904.1	0.0012766	6130.1	0.00010408
											3096.5	-0.013496	4954.3	0.0012185	6192.9	5.2529e-05
											3128.2	-0.013601	5005.1	0.0011645	6256.4	5.3608e-06
											3160.2	-0.013702	5056.4	0.0011145	6320.5	-3.772e-05
											3192.6	-0.013798	5108.2	0.001068	6385.3	-7.6996e-05
											3225.3	-0.013891	5160.6	0.0010251	6450.7	-0.00011274
											3258.4	-0.013979	5213.4	0.00098537	6516.8	-0.0001452
											3291.8	-0.014063	5266.9	0.00094872	6583.6	-0.00017464
											3325.5	-0.014143	5320.8	0.00091493	6651	-0.00020127
											3359.6	-0.014219	5375.4	0.00088381	6719.2	-0.00022534
											3394	-0.014292	5430.4	0.00085521	6788.1	-0.00024704
											3428.8	-0.014362	5486.1	0.00082894	6857.6	-0.00026657
											3463.9	-0.014428	5542.3	0.00080485	6927.9	-0.00028411
											3499.4	-0.01449	5599.1	0.00078278	6998.9	-0.00029985
											3535.3	-0.01455	5656.5	0.00076259	7070.6	-0.00031394
											3571.5	-0.014606	5714.4	0.00074415	7143.1	-0.00032653
											3608.1	-0.01466	5773	0.00072732	7216.3	-0.00033776
											3645.1	-0.01471	5832.2	0.00071199	7290.2	-0.00034776
											3682.5	-0.014758	5891.9	0.00069804	7364.9	-0.00035665
											3720.2	-0.014804	5952.3	0.00068536	7440.4	-0.00036453
											3758.3	-0.014847	6013.3	0.00067385	7516.6	-0.00037152
											3796.8	-0.014887	6074.9	0.00066342	7593.7	-0.00037769
											3835.7	-0.014925	6137.2	0.00065397	7671.5	-0.00038314
											3875	-0.014962	6200.1	0.00064543	7750.1	-0.00038794
											3914.7	-0.014995	6263.6	0.00063772	7829.5	-0.00039216
											3954.9	-0.015027	6327.8	0.00063077	7909.7	-0.00039587
											3995.4	-0.015057	6392.6	0.00062451	7990.8	-0.00039912
											4036.3	-0.015086	6458.1	0.00061888	8072.7	-0.00040196
											4077.7	-0.015112	6524.3	0.00061382	8155.4	-0.00040444
											4119.5	-0.015137	6591.2	0.00060928	8239	-0.0004066
											4161.7	-0.01516	6658.7	0.00060522	8323.4	-0.00040848
											4204.3	-0.015182	6726.9	0.00060159	8408.7	-0.00041011
											4247.4	-0.015203	6795.9	0.00059834	8494.9	-0.00041153
											4290.9	-0.015222	6865.5	0.00059544	8581.9	-0.00041276
											4334.9	-0.01524	6935.9	0.00059286	8669.8	-0.00041382
											4379.3	-0.015256	7007	0.00059057	8758.7	-0.00041473
											4424.2	-0.015272	7078.8	0.00058853	8848.4	-0.00041552
											4469.6	-0.015286	7151.3	0.00058672	8939.1	-0.00041619
											4515.4	-0.0153	7224.6	0.00058511	9030.7	-0.00041677
											4561.6	-0.015312	7298.6	0.0005837	9123.3	-0.00041727
											4608.4	-0.015324	7373.4	0.00058244	9216.8	-0.00041769
											4655.6	-0.015335	7449	0.00058134	9311.2	-0.00041805
											4703.3	-0.015345	7525.3	0.00058036	9406.6	-0.00041836
											4751.5	-0.015354	7602.4	0.00057951	9503	-0.00041862
											4800.2	-0.015363	7680.3	0.00057875	9600.4	-0.00041885
											4849.4	-0.015371	7759	0.0005781	9698.8	-0.00041904
											4899.1	-0.015378	7838.5	0.00057752	9798.2	-0.0004192
											4949.3	-0.015385	7918.9	0.00057701	9898.6	-0.00041933
											5000	-0.015391	8000	0.00057657	10000	-0.00041944
