# Supplementary material for: Single turnover transient state kinetics reveals processive protein unfolding catalyzed by Escherichia coli ClpB
Source: eLife. 2024 Oct 7;13:RP99052. doi: 10.7554/eLife.99052 (PMC11458177; doi:10.7554/eLife.99052)
Supplement: Figure 3—figure supplement 1—source data 1. [file elife-99052-fig3-figsupp1-data1.xlsx]

## Sheet: Supp Fig 4
	relative fluorescence enhancement		relative fluorescence enhancement		relative fluorescence enhancement		relative fluorescence enhancement
time (s)	shot 1	time (s)	shot 2	time (s)	shot 3	time (s)	shot 4
0.075462	-0.0022252	0.075462	0.00093882	0.075462	-0.0016236	0.075462	0.022452
0.15205	-0.0037526	0.15205	-0.00078609	0.15205	-0.00076173	0.15205	-0.0010378
0.2298	-9.9076e-06	0.2298	-0.00036199	0.2298	0.0003205	0.2298	-0.00018624
0.30872	-0.0019141	0.30872	-0.0029714	0.30872	-0.003466	0.30872	-0.0036461
0.38885	-0.00025291	0.38885	-0.00040739	0.38885	-0.00055832	0.38885	-0.00088003
0.47017	-0.00053448	0.47017	-0.0004035	0.47017	-0.0023055	0.47017	-0.0012504
0.55273	0.0013555	0.55273	0.00073131	0.55273	-0.00072913	0.55273	-0.003637
0.63652	-0.00028891	0.63652	0.0017222	0.63652	-0.0021439	0.63652	0.00066667
0.72159	-0.00089834	0.72159	-0.0017017	0.72159	-0.00062351	0.72159	-0.0014082
0.80794	-0.00016934	0.80794	-0.0033592	0.80794	0.0001523	0.80794	0.0012053
0.89559	-0.0012442	0.89559	0.00050305	0.89559	-0.0021347	0.89559	-0.0003336
0.98455	-0.0012159	0.98455	-0.0001506	0.98455	-0.00044749	0.98455	-0.0015634
1.0749	-0.00086234	1.0749	-0.0015007	1.0749	0.0012541	1.0749	-0.00090481
1.1666	-0.0023808	1.1666	-0.00069271	1.1666	-0.0025376	1.1666	1.5598e-06
1.2596	0.00030252	1.2596	-0.0023216	1.2596	0.00072862	1.2596	-0.00018363
1.3541	-0.0023988	1.3541	-0.0012439	1.3541	0.0023076	1.3541	-0.0043229
1.45	-0.00076977	1.45	-0.00080943	1.45	0.00059171	1.45	-0.0047259
1.5473	-0.0017019	1.5473	0.00013862	1.5473	-8.3705e-05	1.5473	-0.00068441
1.6461	-7.2908e-05	1.6461	-0.00049169	1.6461	0.00043655	1.6461	0.00014893
1.7464	0.00044009	1.7464	0.00015029	1.7464	0.00019533	1.7464	-7.2776e-05
1.8482	-0.0019398	1.8482	-0.00030104	1.8482	0.00055781	1.8482	-0.0013678
1.9516	0.00023566	1.9516	0.00024626	1.9516	0.00164	1.9516	-8.1905e-05
2.0565	2.995e-05	2.0565	-0.00049169	2.0565	-0.0023107	2.0565	0.00058972
2.163	0.0008361	2.163	-0.00064083	2.163	-0.0014397	2.163	-0.0010535
2.2711	0.00055452	2.2711	0.001097	2.2711	-0.0015167	2.2711	-0.0017825
2.3808	0.002973	2.3808	0.00050176	2.3808	0.0020951	2.3808	0.00026369
2.4922	0.0008631	2.4922	6.9881e-05	2.4922	-0.0011033	2.4922	0.0019773
2.6053	0.00029352	2.6053	-0.00048261	2.6053	-0.0014397	2.6053	0.00097183
2.72	-0.00018862	2.72	-0.0015175	2.72	0.0020129	2.72	-0.0016873
2.8365	-0.00025805	2.8365	0.001988	2.8365	0.0011185	2.8365	-0.00024362
2.9548	-0.00022848	2.9548	-0.0012413	2.9548	-0.0011177	2.9548	-0.0015138
3.0749	-0.00029148	3.0749	-7.0186e-05	3.0749	-0.00208	3.0749	-0.0010887
3.1967	0.00010195	3.1967	-0.00016097	3.1967	0.00077947	3.1967	-0.00028535
3.3204	-3.479e-06	3.3204	-5.8514e-05	3.3204	0.0026023	3.3204	0.00058451
3.446	0.00020095	3.446	-0.0022062	3.446	-0.00061178	3.446	0.0010383
3.5735	0.001065	3.5735	0.0023278	3.5735	0.00062561	3.5735	0.00069145
3.7028	-0.0013136	3.7028	-0.0012193	3.7028	0.0016074	3.7028	0.00069405
3.8342	0.00012124	3.8342	0.0018985	3.8342	0.00037266	3.8342	-0.00075744
3.9675	0.0026014	3.9675	0.00028128	3.9675	0.001979	3.9675	-0.00020319
4.1028	0.0025538	4.1028	-0.00085482	4.1028	-0.0001502	4.1028	-0.00035577
4.2402	0.00025495	4.2402	-0.00015189	4.2402	-0.00021149	4.2402	0.0010031
4.3796	0.0010842	4.3796	0.0017961	4.3796	0.001108	4.3796	-0.00010799
4.5212	0.0018595	4.5212	0.00045507	4.5212	0.0005226	4.5212	-0.00029709
4.6649	0.00081553	4.6649	0.0019465	4.6649	0.00066473	4.6649	0.00046844
4.8107	0.00030381	4.8107	0.0008195	4.8107	-0.0013263	4.8107	0.00047235
4.9588	-6.3908e-05	4.9588	0.0021514	4.9588	0.0014588	4.9588	-0.00057226
5.1091	0.001389	5.1091	0.0014174	5.1091	0.001228	5.1091	-0.00016015
5.2617	0.00087853	5.2617	0.0022033	5.2617	0.00067125	5.2617	0.00084012
5.4165	0.0023558	5.4165	0.00095438	5.4165	3.8861e-05	5.4165	-0.00058139
5.5737	-0.00040977	5.5737	0.00096994	5.5737	0.0020169	5.5737	0.0019656
5.7333	0.00192	5.7333	0.0012903	5.7333	0.0016361	5.7333	0.00094184
5.8953	-8.8337e-05	5.8953	0.0023123	5.8953	0.00078338	5.8953	-0.0010978
6.0597	0.0008001	6.0597	-0.001336	6.0597	0.0015449	6.0597	0.0030167
6.2266	0.0012012	6.2266	0.0018285	6.2266	0.00050696	6.2266	0.00037193
6.396	0.0026708	6.396	0.00025793	6.396	0.0011563	6.396	0.00032629
6.568	-0.00021048	6.568	0.00048879	6.568	0.00083032	6.568	-0.00076657
6.7426	0.00074738	6.7426	0.0028232	6.7426	0.0012358	6.7426	0.00083229
6.9198	0.0020125	6.9198	0.0009453	6.9198	0.0010116	6.9198	0.0017243
7.0997	0.00058538	7.0997	0.0013901	7.0997	0.0020938	7.0997	0.0013057
7.2823	0.00080524	7.2823	0.0032045	7.2823	0.0034185	7.2823	0.00082838
7.4676	0.001839	7.4676	0.00056271	7.4676	0.0022594	7.4676	0.001693
7.6558	0.00053524	7.6558	0.0016573	7.6558	0.00078469	7.6558	0.00047496
7.8468	0.0012732	7.8468	0.00020346	7.8468	0.001009	7.8468	0.00038497
8.0407	0.0024638	8.0407	0.00097124	8.0407	0.0016896	8.0407	0.0018182
8.2375	0.00021767	8.2375	0.00091807	8.2375	0.0028983	8.2375	-1.8002e-05
8.4372	0.0016808	8.4372	0.00063015	8.4372	0.0018695	8.4372	0.00021935
8.64	0.0021038	8.64	0.0018013	8.64	0.0023963	8.64	0.0002676
8.8459	-0.0010822	8.8459	0.0018454	8.8459	0.0023428	8.8459	0.0011909
9.0548	0.001155	9.0548	0.0022721	9.0548	-8.5008e-05	9.0548	0.0017426
9.2669	0.001479	9.2669	-0.0010688	9.2669	0.00059562	9.2669	0.00035498
9.4822	0.0016011	9.4822	0.00056141	9.4822	0.0012124	9.4822	-0.00047314
9.7008	0.0014828	9.7008	0.001765	9.7008	0.0026884	9.7008	-0.00023318
9.9227	0.0025371	9.9227	0.00063015	9.9227	0.0012958	9.9227	0.0019173
10.148	0.0023018	10.148	0.0015808	10.148	0.0013167	10.148	0.0020699
10.376	0.0023828	10.376	0.0010555	10.376	0.00030616	10.376	0.0017804
10.608	0.0026914	10.608	0.0031384	10.608	0.0013636	10.608	0.0014257
10.844	0.0014841	10.844	0.0033485	10.844	0.0019308	10.844	0.00058842
11.083	0.0021205	11.083	0.0023797	11.083	0.00052521	11.083	0.0014413
11.326	0.0013234	11.326	0.001905	11.326	0.0014145	11.326	0.0031171
11.572	0.0029678	11.572	0.0019465	11.572	0.0032947	11.572	0.0027155
11.822	0.0023172	11.822	0.0019686	11.822	0.0012071	11.822	0.0014987
12.076	0.0029048	12.076	0.0010361	12.076	0.0021238	12.076	0.0010644
12.334	0.0015034	12.334	0.0026793	12.334	0.0022855	12.334	0.0014074
12.595	0.0012797	12.595	0.0011917	12.595	0.0010024	12.595	0.0015378
12.861	0.0014905	12.861	0.0020399	12.861	0.0019152	12.861	0.00046844
13.131	0.00083995	13.131	0.0015341	13.131	0.001271	13.131	0.00072274
13.404	0.002523	13.404	0.0022837	13.404	0.00099331	13.404	0.0014987
13.682	0.001308	13.682	0.0017079	13.682	0.0017548	13.682	0.0012105
13.964	0.0020845	13.964	0.00091677	13.964	0.0033781	13.964	0.0014831
14.25	0.0025294	14.25	0.0026443	14.25	0.0024302	14.25	0.0022538
14.541	0.0015844	14.541	0.0021022	14.541	0.0033247	14.541	0.0018456
14.835	0.002631	14.835	0.0022772	14.835	0.0036898	14.835	0.0015104
15.135	0.0034757	15.135	0.0026326	15.135	0.0030443	15.135	0.0026411
15.439	0.0012038	15.439	0.0018415	15.439	0.0012841	15.439	0.0020451
15.747	0.0024587	15.747	0.0025314	15.747	0.0029465	15.747	0.0019904
16.06	0.0021514	16.06	0.0026559	16.06	0.0033677	16.06	0.0012014
16.378	0.0027595	16.378	0.0025094	16.378	0.0027927	16.378	0.0029111
16.701	0.0040041	16.701	0.0017001	16.701	0.0022855	16.701	0.0025929
17.028	0.0015535	17.028	0.003093	17.028	0.0024028	17.028	0.0013305
17.361	0.0019765	17.361	0.0050877	17.361	0.0030391	17.361	0.0025068
17.698	0.0029704	17.698	0.0024056	17.698	0.0027927	17.698	0.0025185
18.041	0.001344	18.041	0.0032266	18.041	0.0024641	18.041	0.0024142
18.388	0.0032057	18.388	0.0034497	18.388	0.0018174	18.388	0.0020386
18.741	0.0011897	18.741	0.0031553	18.741	0.0040183	18.741	0.0016317
19.1	0.004206	19.1	0.0042032	19.1	0.002275	19.1	0.0014609
19.463	0.0030051	19.463	0.0024069	19.463	0.0032503	19.463	0.002825
19.833	0.0030604	19.833	0.0043186	19.833	0.0034198	19.833	0.0024129
20.207	0.0025718	20.207	0.0025237	20.207	0.0034876	20.207	0.00090923
20.588	0.0022632	20.588	0.0022215	20.588	0.0029022	20.588	0.00068101
20.974	0.0030681	20.974	0.0034678	20.974	0.0043952	20.974	0.0028876
21.366	0.0016757	21.366	0.0035067	21.366	0.0034094	21.366	0.0027011
21.764	0.003252	21.764	0.0029244	21.764	0.0030508	21.764	0.0025603
22.168	0.0027042	22.168	0.0032785	22.168	0.0033194	22.168	0.0023164
22.578	0.002514	22.578	0.0025535	22.578	0.0035098	22.578	0.0021782
22.994	0.0027827	22.994	0.0037311	22.994	0.002498	22.994	0.0030689
23.416	0.0039861	23.416	0.0043575	23.416	0.0043039	23.416	0.0017087
23.845	0.0027493	23.845	0.0036429	23.845	0.0029726	23.845	0.0019486
24.281	0.0036171	24.281	0.0028842	24.281	0.0036924	24.281	0.0036192
24.722	0.0037881	24.722	0.0040138	24.722	0.0037745	24.722	0.0033414
25.171	0.0041481	25.171	0.0022902	25.171	0.003914	25.171	0.0031236
25.626	0.0038768	25.626	0.0040605	25.626	0.0050132	25.626	0.0020843
26.088	0.004584	26.088	0.0030995	26.088	0.0032725	26.088	0.0030754
26.558	0.0038833	26.558	0.0041176	26.558	0.0043704	26.558	0.0037379
27.034	0.0047948	27.034	0.0036909	27.034	0.0042061	27.034	0.0030089
27.517	0.0038987	27.517	0.0027714	27.517	0.0045255	27.517	0.0021416
28.008	0.0045081	28.008	0.0030761	28.008	0.0039962	28.008	0.003344
28.506	0.0042973	28.506	0.00377	28.506	0.0050406	28.506	0.0030897
29.012	0.0044528	29.012	0.0033991	29.012	0.0045738	29.012	0.0038109
29.525	0.0041995	29.525	0.0044159	29.525	0.0044173	29.525	0.003601
30.046	0.0049144	30.046	0.0048944	30.046	0.0046403	30.046	0.0029046
30.575	0.005088	30.575	0.005552	30.575	0.0046559	30.575	0.0037249
31.112	0.0044901	31.112	0.004801	31.112	0.0043104	31.112	0.0035371
31.657	0.0049645	31.657	0.0047349	31.657	0.0053353	31.657	0.0037679
32.21	0.0053323	32.21	0.0050942	32.21	0.0052701	32.21	0.0026163
32.772	0.0045223	32.772	0.0047453	32.772	0.0042713	32.772	0.0036101
33.342	0.0037984	33.342	0.0044976	33.342	0.0039818	33.342	0.0037027
33.92	0.004584	33.92	0.0045935	33.92	0.0053509	33.92	0.0031054
34.508	0.0045505	34.508	0.0055377	34.508	0.0044551	34.508	0.0033232
35.104	0.0052898	35.104	0.0055157	35.104	0.0051853	35.104	0.0033714
35.709	0.0055135	35.709	0.0050864	35.709	0.0049702	35.709	0.003494
36.323	0.0050623	36.323	0.0051019	36.323	0.0047172	36.323	0.0032684
36.947	0.0046688	36.947	0.0053704	36.947	0.0053392	36.947	0.0043156
37.58	0.0053284	37.58	0.0049359	37.58	0.0053796	37.58	0.0033845
38.223	0.0047383	38.223	0.0060215	38.223	0.0053861	38.223	0.0047629
38.875	0.0060291	38.875	0.0051227	38.875	0.0060798	38.875	0.0040783
39.537	0.0054043	39.537	0.0050436	39.537	0.005334	39.537	0.0044239
40.209	0.0060227	40.209	0.0056868	40.209	0.0060368	40.209	0.0045934
40.891	0.0050944	40.891	0.006404	40.891	0.0051931	40.891	0.0045465
41.584	0.0061757	41.584	0.005172	41.584	0.0049037	41.584	0.0034145
42.287	0.0054544	42.287	0.0055597	42.287	0.0070812	42.287	0.0044839
43.001	0.004611	43.001	0.006238	43.001	0.0052805	43.001	0.0046586
43.725	0.0059018	43.725	0.0057024	43.725	0.0058894	43.725	0.0037757
44.46	0.006483	44.46	0.0057828	44.46	0.0063458	44.46	0.0056054
45.207	0.0063981	45.207	0.0058425	45.207	0.0069143	45.207	0.0043652
45.965	0.0066116	45.965	0.0066232	45.965	0.0066613	45.965	0.0049286
46.734	0.0063956	46.734	0.0053367	46.734	0.0057721	46.734	0.0045425
47.514	0.0054698	47.514	0.0065363	47.514	0.006338	47.514	0.0047981
48.307	0.0058106	48.307	0.0063664	48.307	0.0062206	48.307	0.0048829
49.111	0.006654	49.111	0.006452	49.111	0.0068556	49.111	0.0047095
49.928	0.0067646	49.928	0.0064442	49.928	0.0058021	49.928	0.0047981
50.757	0.0073624	50.757	0.005395	50.757	0.0067409	50.757	0.0056184
51.598	0.0060844	51.598	0.0060383	51.598	0.0068243	51.598	0.0049742
52.453	0.0064611	52.453	0.0074948	52.453	0.0062232	52.453	0.005565
53.32	0.007365	53.32	0.0066894	53.32	0.0065153	53.32	0.0054972
54.2	0.0073727	54.2	0.0065078	54.2	0.0070003	54.2	0.0052416
55.093	0.0069536	55.093	0.006548	55.093	0.0070642	55.093	0.0054724
56	0.0069471	56	0.0068268	56	0.0067865	56	0.0063435
56.921	0.0072094	56.921	0.0063664	56.921	0.0070421	56.921	0.0055898
57.855	0.0075913	57.855	0.0073702	57.855	0.0074567	57.855	0.0060775
58.804	0.006267	58.804	0.0079007	58.804	0.007458	58.804	0.0054007
59.766	0.0078703	59.766	0.0075778	59.766	0.0074619	59.766	0.0060449
60.744	0.0071387	60.744	0.0074092	60.744	0.0068217	60.744	0.0058075
61.736	0.0074653	61.736	0.0070045	61.736	0.0065153	61.736	0.0059901
62.743	0.0074177	62.743	0.0070849	62.743	0.0071346	62.743	0.0061727
63.766	0.0078651	63.766	0.0079902	63.766	0.006986	63.766	0.006024
64.803	0.0079616	64.803	0.0069695	64.803	0.0066965	64.803	0.0059027
65.857	0.0074177	65.857	0.0076685	65.857	0.0076079	65.857	0.0063918
66.926	0.0080361	66.926	0.007404	66.926	0.0078296	66.926	0.005432
68.012	0.0075424	68.012	0.0074999	68.012	0.0076679	68.012	0.0064648
69.113	0.0081493	69.113	0.0074338	69.113	0.0070655	69.113	0.006187
70.232	0.0081544	70.232	0.0078423	70.232	0.0074528	70.232	0.0065783
71.367	0.008085	71.367	0.0076037	71.367	0.0078974	71.367	0.005741
72.52	0.0083473	72.52	0.0076854	72.52	0.0076184	72.52	0.0061688
73.69	0.0076517	73.69	0.0079383	73.69	0.0081086	73.69	0.0063031
74.877	0.0081711	74.877	0.0085206	74.877	0.0073954	74.877	0.0064048
76.083	0.008409	76.083	0.0083079	76.083	0.0072885	76.083	0.0062405
77.306	0.0083987	77.306	0.0074299	77.306	0.0074202	77.306	0.0057697
78.548	0.0083087	78.548	0.008256	78.548	0.0074137	78.548	0.0061766
79.809	0.0084064	79.809	0.0078371	79.809	0.0077761	79.809	0.0068091
81.089	0.0086919	81.089	0.0086957	81.089	0.0080121	81.089	0.0065861
82.388	0.007833	82.388	0.0083754	82.388	0.007797	82.388	0.0063514
83.707	0.0088359	83.707	0.0083728	83.707	0.0081165	83.707	0.0064179
85.046	0.0082946	85.046	0.0085466	85.046	0.0074632	85.046	0.0062601
86.405	0.0086289	86.405	0.0079668	86.405	0.0073419	86.405	0.0062796
87.784	0.0081081	87.784	0.0074325	87.784	0.0077292	87.784	0.0066213
89.185	0.0085479	89.185	0.0084648	89.185	0.0074984	89.185	0.0066383
90.606	0.0084514	90.606	0.008841	90.606	0.0081464	90.606	0.0064753
92.049	0.0083974	92.049	0.0086801	92.049	0.0081464	92.049	0.0071195
93.513	0.0079628	93.513	0.0084493	93.513	0.0083616	93.513	0.0061557
95	0.0079268	95	0.0087528	95	0.0073928	95	0.0069082
96.509	0.0085311	96.509	0.0080031	96.509	0.0078857	96.509	0.0063331
98.041	0.0084823	98.041	0.008828	98.041	0.0079	98.041	0.0065548
99.596	0.0086649	99.596	0.0082846	99.596	0.0079665	99.596	0.0063396
101.18	0.0091483	101.18	0.0084545	101.18	0.0079104	101.18	0.0069004
102.78	0.008049	102.78	0.0088332	102.78	0.0084802	102.78	0.0061023
104.4	0.0089323	104.4	0.0082327	104.4	0.0080539	104.4	0.0068782
106.05	0.0084129	106.05	0.0076115	106.05	0.0081777	106.05	0.0070752
107.73	0.0082624	107.73	0.0083857	107.73	0.0078805	107.73	0.0064127
109.43	0.0079127	109.43	0.0080057	109.43	0.0076823	109.43	0.0063735
111.16	0.0083331	111.16	0.0086646	111.16	0.0077696	111.16	0.0065522
112.91	0.0081351	112.91	0.0088397	112.91	0.0085207	112.91	0.0061258
114.69	0.0090326	114.69	0.0078086	114.69	0.0077488	114.69	0.0062249
116.5	0.008355	116.5	0.0083974	116.5	0.0079574	116.5	0.0064518
118.33	0.0084386	118.33	0.0079694	118.33	0.0075819	118.33	0.0061062
120.19	0.0086751	120.19	0.0080083	120.19	0.008046	120.19	0.0064244
122.08	0.0084591	122.08	0.0073728	122.08	0.0078348	122.08	0.0061114
124	0.0080953	124	0.0081938	124	0.007887	124	0.0064531
125.95	0.008058	125.95	0.0082729	125.95	0.0077292	125.95	0.0065196
127.92	0.0082817	127.92	0.0078021	127.92	0.0083485	127.92	0.0058401
129.93	0.0083743	129.93	0.0083079	129.93	0.0071803	129.93	0.0065105
131.96	0.0078034	131.96	0.008435	131.96	0.0076523	131.96	0.00698
134.03	0.007977	134.03	0.007701	134.03	0.0075414	134.03	0.0060162
136.13	0.0082328	136.13	0.0071407	136.13	0.0076145	136.13	0.0060592
138.26	0.0082226	138.26	0.0076958	138.26	0.007664	138.26	0.0061205
140.42	0.0079718	140.42	0.007701	140.42	0.007368	140.42	0.0059979
142.62	0.0073238	142.62	0.0076335	142.62	0.0073172	142.62	0.0062523
144.84	0.0071683	144.84	0.0066647	144.84	0.0076092	144.84	0.0058571
147.1	0.0076748	147.1	0.0073015	147.1	0.007308	147.1	0.0065965
149.4	0.0070076	149.4	0.0074325	149.4	0.007076	149.4	0.0056458
151.73	0.0070153	151.73	0.0069293	151.73	0.0074802	151.73	0.005711
154.1	0.0071438	154.1	0.0071965	154.1	0.0067878	154.1	0.0056471
156.5	0.0066103	156.5	0.0069539	156.5	0.0075297	156.5	0.0060097
158.93	0.0070436	158.93	0.0069189	158.93	0.0072063	158.93	0.0055193
161.41	0.0073946	161.41	0.0068995	161.41	0.0073654	161.41	0.0056693
163.92	0.0067427	163.92	0.0067503	163.92	0.0068947	163.92	0.0060266
166.47	0.0071323	166.47	0.0066297	166.47	0.0067122	166.47	0.0052494
169.06	0.0065113	169.06	0.0064196	169.06	0.0068582	169.06	0.0051085
171.68	0.0061988	171.68	0.006618	171.68	0.00672	171.68	0.0053707
174.35	0.006411	174.35	0.0061849	174.35	0.0068008	174.35	0.0050903
177.06	0.0062477	177.06	0.006002	177.06	0.0066548	177.06	0.0053407
179.8	0.0058273	179.8	0.0061421	179.8	0.0066952	179.8	0.0051177
182.59	0.0062734	182.59	0.0057296	182.59	0.0064631	182.59	0.0046573
185.42	0.0055946	185.42	0.0061006	185.42	0.0058346	185.42	0.0050433
188.3	0.005988	188.3	0.0059151	188.3	0.0053822	188.3	0.0046664
191.21	0.0054814	191.21	0.0056259	191.21	0.0063432	191.21	0.0048477
194.18	0.0052744	194.18	0.0054988	194.18	0.0062258	194.18	0.0048725
197.18	0.0056023	197.18	0.0057024	197.18	0.0061137	197.18	0.0048907
200.23	0.0055521	200.23	0.0049943	200.23	0.0053287	200.23	0.0047473
203.33	0.0051638	203.33	0.0052537	203.33	0.0057356	203.33	0.004656
206.47	0.005142	206.47	0.0055027	206.47	0.0051957	206.47	0.0044447
209.67	0.0054608	209.67	0.0051914	209.67	0.0048254	209.67	0.0042309
212.9	0.0046701	212.9	0.0047634	212.9	0.0045073	212.9	0.0041748
216.19	0.0046328	216.19	0.0045222	216.19	0.0049089	216.19	0.0041109
219.53	0.0042703	219.53	0.0045183	219.53	0.0045047	219.53	0.004223
222.92	0.0043525	222.92	0.004495	222.92	0.004935	222.92	0.0036401
226.36	0.0044194	226.36	0.0047155	226.36	0.0045438	226.36	0.0038696
229.85	0.0042651	229.85	0.0043043	229.85	0.0047876	229.85	0.0036727
233.4	0.0041828	233.4	0.0040877	233.4	0.0042921	233.4	0.0032997
236.99	0.0038434	236.99	0.0040696	236.99	0.0041083	236.99	0.0036636
240.65	0.0039347	240.65	0.0036935	240.65	0.0044643	240.65	0.0039948
244.35	0.0030668	244.35	0.0037155	244.35	0.0041605	244.35	0.0032371
248.12	0.0030668	248.12	0.0038322	248.12	0.0039479	248.12	0.003258
251.94	0.0030115	251.94	0.0032772	251.94	0.0040614	251.94	0.0031119
255.81	0.0030025	255.81	0.0035664	255.81	0.0037054	255.81	0.0029345
259.75	0.0028135	259.75	0.0032616	259.75	0.0038984	259.75	0.0026516
263.74	0.002901	263.74	0.0036053	263.74	0.0036689	263.74	0.0024977
267.8	0.0024535	267.8	0.0031669	267.8	0.0031239	267.8	0.0027702
271.92	0.0022002	271.92	0.0038504	271.92	0.0032243	271.92	0.0027689
276.1	0.0020524	276.1	0.0034056	276.1	0.0030613	276.1	0.0022355
280.34	0.0021282	280.34	0.0030606	280.34	0.0025293	280.34	0.0020204
284.64	0.002082	284.64	0.0032655	284.64	0.002601	284.64	0.0022486
289.02	0.0020074	289.02	0.0030437	289.02	0.0022633	289.02	0.0026933
293.45	0.0020922	293.45	0.00308	293.45	0.0023846	293.45	0.0023972
297.96	0.001884	297.96	0.0032499	297.96	0.0021003	297.96	0.0022238
302.53	0.0015574	302.53	0.0028725	302.53	0.0019647	302.53	0.0024677
307.17	0.0017297	307.17	0.0031345	307.17	0.0024002	307.17	0.0028576
311.88	0.001434	311.88	0.0027908	311.88	0.0020208	311.88	0.0019773
316.66	0.0014892	316.66	0.0024601	316.66	0.0015305	316.66	0.0025237
321.52	0.0011112	321.52	0.0021125	321.52	0.0020182	321.52	0.0018521
326.45	0.0013208	326.45	0.0023097	326.45	0.0013506	326.45	0.001766
331.45	0.0014751	331.45	0.0020386	331.45	0.0017691	331.45	0.0016956
336.52	0.00088238	336.52	0.0023966	336.52	0.001996	336.52	0.001513
341.68	0.00057124	341.68	0.0025574	341.68	0.0017222	341.68	0.0015952
346.91	0.00048124	346.91	0.0022007	346.91	0.0014158	346.91	0.0019721
352.22	0.00028067	352.22	0.0020023	352.22	0.0014888	352.22	0.0013513
357.61	0.0009621	357.61	0.001691	357.61	0.0014927	357.61	0.00094966
363.08	0.00024466	363.08	0.0018817	363.08	0.0015579	363.08	0.0013331
368.64	0.00039124	368.64	0.0015886	368.64	0.0014862	368.64	0.0012001
374.28	3.1236e-05	374.28	0.001848	374.28	0.0016205	374.28	0.0011818
380	0.00015467	380	0.0015665	380	0.0012502	380	0.0010879
385.81	5.695e-05	385.81	0.0014524	385.81	0.00086814	385.81	0.0008036
391.71	-7.0337e-05	391.71	0.001586	391.71	0.0011706	391.71	0.00085968
397.7	0.00027424	397.7	0.0014342	397.7	0.001065	397.7	0.00073839
403.77	-0.0003262	403.77	0.001276	403.77	0.0013141	403.77	0.00066797
409.94	-0.00020405	409.94	0.0014122	409.94	0.00084858	409.94	0.00052321
416.21	-0.00025034	416.21	0.0011126	416.21	0.0008564	416.21	0.00062754
422.56	-0.00037119	422.56	0.00099459	422.56	0.00060736	422.56	0.00046713
429.02	-0.00054091	429.02	0.00099459	429.02	0.00071819	429.02	0.00041366
435.57	-0.00021434	435.57	0.0010776	435.57	0.00051609	435.57	0.00028195
442.21	-0.00042648	442.21	0.0011385	442.21	0.00045089	442.21	0.0002663
448.96	-0.00059234	448.96	0.00098162	448.96	0.00031659	448.96	0.00045931
455.81	-0.00041234	455.81	0.00077152	455.81	0.00068429	455.81	0.00033542
462.77	-0.00057562	462.77	0.00063404	462.77	0.00072471	462.77	0.00030281
469.83	-0.00076463	469.83	0.00066128	469.83	0.00036875	469.83	0.00031455
476.99	-0.00060391	476.99	0.00099588	476.99	0.00074818	476.99	8.6328e-05
484.27	-0.00075305	484.27	0.0010387	484.27	0.00063865	484.27	-3.4956e-05
491.65	-0.00056277	491.65	0.0011139	491.65	0.0004887	491.65	0.00027151
499.15	-0.0006682	499.15	0.0010024	499.15	0.00054738	499.15	0.0004254
506.75	-0.0006862	506.75	0.00070278	506.75	0.00079381	506.75	0.00024543
514.48	-0.00079163	514.48	0.00045507	514.48	0.00047436	514.48	-0.00028405
522.32	-0.00085077	522.32	0.00039152	522.32	0.00026183	522.32	-6.4951e-05
530.28	-0.0007402	530.28	0.00016974	530.28	9.1017e-05	530.28	-0.00020188
538.35	-0.00085205	538.35	0.00023718	538.35	0.00044567	538.35	-0.00022275
546.55	-0.0010231	546.55	0.00046933	546.55	0.00037135	546.55	-0.00024362
554.88	-0.0011375	554.88	0.00055882	554.88	0.00023966	554.88	-6.4951e-05
563.33	-0.00097677	563.33	0.00029165	563.33	0.00052652	563.33	-0.00044445
571.9	-0.0011915	571.9	0.00020995	571.9	0.00010536	571.9	-0.0003636
580.61	-0.0010475	580.61	6.21e-05	580.61	4.4077e-05	580.61	-0.00061268
589.45	-0.00096905	589.45	4.2646e-05	589.45	0.00022923	589.45	-0.00057878
598.42	-0.00097806	598.42	1.5411e-05	598.42	0.0005565	598.42	-0.00070919
607.52	-0.00099348	607.52	0.00016456	607.52	0.00034658	607.52	-0.00062442
616.77	-0.0010526	616.77	0.00014251	616.77	0.00049392	616.77	-0.00077961
626.15	-0.00078263	626.15	6.332e-06	626.15	0.00029051	626.15	-0.00061529
635.68	-0.0008932	635.68	3.4864e-05	635.68	0.0001184	635.68	-0.0004588
645.34	-0.00092277	645.34	0.00022551	645.34	0.00020315	645.34	-0.00066876
655.16	-0.0011336	655.16	4.0052e-05	655.16	0.00012622	655.16	-0.00059834
665.12	-0.0010372	665.12	-2.0903e-05	665.12	-8.079e-06	665.12	-0.00065442
675.23	-0.00097548	675.23	0.00023329	675.23	0.00044176	675.23	-0.00052792
685.5	-0.00087391	685.5	2.5786e-05	685.5	-1.3295e-05	685.5	-0.00099871
695.92	-0.0010719	695.92	0.00019828	695.92	0.00031789	695.92	-0.00087873
706.5	-0.0011516	706.5	-0.0001908	706.5	0.00022401	706.5	-0.00081352
717.24	-0.0013136	717.24	-0.0002336	717.24	0.00051087	717.24	-0.00068441
728.14	-0.0014178	728.14	-0.00012466	728.14	0.0001849	728.14	-0.00065572
739.2	-0.0013535	739.2	-0.0003594	739.2	1.0176e-05	739.2	-0.00069485
750.43	-0.0011233	750.43	-0.00015708	750.43	-0.00036795	750.43	-0.00068311
761.83	-0.0014216	761.83	-0.00058636	761.83	-0.00027929	761.83	-0.0007118
773.41	-0.0012725	773.41	-0.00048131	773.41	-0.00033796	773.41	-0.0007757
785.15	-0.0015361	785.15	-0.0003996	785.15	-0.00031449	785.15	-0.0004601
797.08	-0.0012223	797.08	-0.0004437	797.08	-0.00044879	797.08	-0.00059051
809.18	-0.0014486	809.18	-0.00061749	809.18	-0.00026625	809.18	-0.00079787
821.47	-0.0017469	821.47	-0.00021544	821.47	-0.00027016	821.47	-0.00074571
833.94	-0.0015605	833.94	-0.00055005	833.94	-0.00040707	833.94	-0.00086569
846.6	-0.0011208	846.6	-0.00059285	846.6	-0.00022322	846.6	-0.00090742
859.45	-0.0010848	859.45	-0.00059933	859.45	-0.00026364	859.45	-0.00099871
872.5	-0.0011002	872.5	-0.00069141	872.5	-0.00045662	872.5	-0.00086699
885.74	-0.0013329	885.74	-0.00063046	885.74	-0.00024408	885.74	-0.00069093
899.18	-0.0012751	899.18	-0.00041128	899.18	-4.9804e-05	899.18	-0.00077831
912.83	-0.0010732	912.83	-0.00037885	912.83	-0.00029493	912.83	-0.0010548
926.68	-0.0013342	926.68	-0.00068622	926.68	-9.6743e-05	926.68	-0.00090742
940.74	-0.0014923	940.74	-0.00058117	940.74	-0.00015411	940.74	-0.00089438
955.01	-0.0015245	955.01	-0.00053578	955.01	-0.00014629	955.01	-0.00096741
969.5	-0.0014422	969.5	-0.00064991	969.5	-0.0002154	969.5	-0.00092959
984.21	-0.0012673	984.21	-0.00043981	984.21	7.4066e-05	984.21	-0.0011317
999.14	-0.0014872	999.14	-0.00068493	999.14	0.00017838	999.14	-0.0014604
1014.3	-0.0013123	1014.3	-0.00054486	1014.3	0.00010275	1014.3	-0.0011278
1029.7	-0.0013946	1029.7	-0.00079127	1029.7	-0.00013716	1029.7	-0.0010652
1045.3	-0.0014332	1045.3	-0.00089762	1045.3	0.00020576	1045.3	-0.0011943
1061.1	-0.0015618	1061.1	-0.00058506	1061.1	0.00017447	1061.1	-0.0012204
1077.2	-0.0014306	1077.2	-0.00056691	1077.2	0.00027226	1077.2	-0.0015386
1093.6	-0.0015193	1093.6	-0.00085871	1093.6	0.00017447	1093.6	-0.0012387
1110.1	-0.0015116	1110.1	-0.00074588	1110.1	3.8861e-05	1110.1	-0.0013
1127	-0.0012751	1127	-0.00078479	1127	-9.1528e-05	1127	-0.0013326
1144.1	-0.0013663	1144.1	-0.00063824	1144.1	7.7978e-05	1144.1	-0.00133
1161.4	-0.0012301	1161.4	-0.00065639	1161.4	-0.00010978	1161.4	-0.0013026
1179	-0.0011555	1179	-0.00066807	1179	-9.1528e-05	1179	-0.001433
1196.9	-0.0012313	1196.9	-0.0006097	1196.9	-0.00013325	1196.9	-0.0012921
1215	-0.0011362	1215	-0.00059544	1215	-0.00012543	1215	-0.0013821
1233.4	-0.0012185	1233.4	-0.00047872	1233.4	-0.0001815	1233.4	-0.0013287
1252.1	-0.0012673	1252.1	-0.00047612	1252.1	-0.00011109	1252.1	-0.0014108
1271.1	-0.0012853	1271.1	-0.00054486	1271.1	-0.0004175	1271.1	-0.0012608
1290.3	-0.0013921	1290.3	-0.00051244	1290.3	-9.8047e-05	1290.3	-0.0014212
1309.9	-0.0013162	1309.9	-0.0010688	1309.9	-0.00027277	1309.9	-0.0014656
1329.7	-0.0013329	1329.7	-0.00066936	1329.7	-0.00017628	1329.7	-0.0013547
1349.9	-0.0013381	1349.9	-0.0007796	1349.9	-0.00013847	1349.9	-0.0012648
1370.3	-0.0012005	1370.3	-0.0011285	1370.3	-0.00021931	1370.3	-0.0014525
1391.1	-0.0012172	1391.1	-0.00090281	1391.1	-0.00017367	1391.1	-0.0011904
1412.1	-0.0013239	1412.1	-0.0010623	1412.1	-0.00024799	1412.1	-0.0013378
1433.5	-0.0014268	1433.5	-0.0010805	1433.5	-0.0002506	1433.5	-0.0014134
1455.2	-0.0012262	1455.2	-0.0011194	1455.2	-0.00022583	1455.2	-0.0014904
1477.3	-0.0013651	1477.3	-0.00096377	1477.3	-0.00029363	1477.3	-0.0016182
1499.6	-0.0013072	1499.6	-0.0010156	1499.6	-3.6765e-05	1499.6	-0.0015869
1522.3	-0.0010912	1522.3	-0.00094042	1522.3	-0.00035491	1522.3	-0.0014604
1545.4	-0.0013625	1545.4	-0.00094042	1545.4	-0.00035231	1545.4	-0.0016625
1568.8	-0.0014101	1568.8	-0.00089114	1568.8	-0.0001815	1568.8	-0.0017721
1592.5	-0.0014229	1592.5	-0.00097544	1592.5	-0.00021409	1592.5	-0.0016756
1616.7	-0.0013213	1616.7	-0.00094301	1616.7	-0.00013586	1616.7	-0.0014408
1641.1	-0.0012416	1641.1	-0.0010507	1641.1	-0.00026364	1641.1	-0.0017069
1666	-0.0012982	1666	-0.0011129	1666	-9.2832e-05	1666	-0.0016469
1691.2	-0.0014152	1691.2	-0.00084315	1691.2	-0.00016585	1691.2	-0.0017577
1716.8	-0.0014062	1716.8	-0.00092486	1716.8	1.0482e-06	1716.8	-0.0018086
1742.8	-0.0013303	1742.8	-0.0012128	1742.8	-0.00010066	1742.8	-0.0018999
1769.1	-0.0011966	1769.1	-0.00089892	1769.1	2.5822e-05	1769.1	-0.0019964
1795.9	-0.0013638	1795.9	-0.0011946	1795.9	-3.5461e-05	1795.9	-0.0022585
1823.1	-0.0015643	1823.1	-0.0010688	1823.1	3.8861e-05	1823.1	-0.0018907
1850.7	-0.0013998	1850.7	-0.0010792	1850.7	0.00018359	1850.7	-0.0019155
1878.7	-0.0015168	1878.7	-0.0011596	1878.7	0.00055259	1878.7	-0.0019155
1907.1	-0.0015991	1907.1	-0.0011505	1907.1	9.884e-05	1907.1	-0.0019951
1936	-0.0014512	1936	-0.0012945	1936	0.00012231	1936	-0.0020198
1965.3	-0.0013805	1965.3	-0.0012634	1965.3	0.00041569	1965.3	-0.0021398
2000	-0.0014653	2000	-0.0012335	2000	0.00015882	2000	-0.0019912
