# Supplementary material for: Single turnover transient state kinetics reveals processive protein unfolding catalyzed by Escherichia coli ClpB
Source: eLife. 2024 Oct 7;13:RP99052. doi: 10.7554/eLife.99052 (PMC11458177; doi:10.7554/eLife.99052)
Supplement: Figure 3—source data 1. — The error bars for each relative fluorescence enhancement data point are tabulated here as standard deviation. The data points corresponding to the fits shown in black in Figure 3B are tabulated after ‘fit data to Scheme 1' for each RepA-TitinX substrate. The sheet labeled ‘Figure 3C' are data points for the total length vs. peak time plot shown in Figure 3C at each Δt1. The sheet labeled ‘Figure 3D' has data points for the rate of translocation as a function of Δt1 shown in Figure 3D. The error bars represented in Figure 3D are tabulated as the standard deviation in this sheet for each corresponding rate of translocation. The sheet labeled ‘Figure 3E’ consists of data points for pre-translocated distance as a function of Δt1, as shown in Figure 3E. The error bars represented in Figure 3E are tabulated as the standard deviation in this sheet for each corresponding pre-translocated distance. [file elife-99052-fig3-data1.xlsx]

## Sheet: Figure 3 E
Dt1 (s)	pre-translocated distance(aa)	Standard deviation (aa)
300	73.014	1.8641
420	85.925	16.953
600	97.399	17.706

## Sheet: Figure 3 D
Dt1 (s)	rate of translocation (aa s-1)	Standard deviation (aa s-1)
300	0.89752	0.15692
420	0.90506	0.17824
600	0.88764	0.24705

## Sheet: Figure 3 C
Dt1 300 s	Total length of substrate(aa)	Peak time(s)	Standard deviation(s)
	168	110.25	22.36
	265	214.58	30.396
	362	330.28	62.644
Dt1 420 s	Total length of substrate(aa)	Peak time(s)	Standard deviation(s)
	168	99.167	11.203
	265	188.24	14.175
	362	315.37	51.581
Dt1 600 s	Total length of substrate(aa)	Peak time(s)	Standard deviation(s)
	168	82.963	10.888
	265	192.04	25.76
	362	312.69	79.792

## Sheet: Figure 3 B
	RepA-Titin1			RepA-Titin 2			RepA-Titin 3				Fit data to Scheme 1			RepA-Titin1		RepA-Titin 2		RepA-Titin 3
time (s)	Relative fluorescence enhancement	Standard deviation	time (s)	Relative fluorescence enhancement	Standard deviation	time (s)	Relative fluorescence enhancement	Standard deviation					time (s)	Relative fluorescence enhancement	time (s)	Relative fluorescence enhancement	time (s)	Relative fluorescence enhancement
1.45	-0.0014295	0.0020437	0.15091	0.00010168	0.00096839	3.4928	-0.00069048	0.000596					1.45	0.00019068	0.15091	3.4061e-11	3.4928	3.312e-10
1.5473	-0.00058349	0.00094623	0.3041	0.00072536	0.001487	3.6964	-0.0010097	0.00094422					1.4592	0.00019203	0.15234	3.5145e-11	3.5152	3.4093e-10
1.6461	4.5166e-06	0.00045015	0.45961	-0.00027217	0.0012781	3.9032	-4.8317e-05	0.0013323					1.4684	0.0001934	0.15378	3.6263e-11	3.5376	3.5095e-10
1.7464	0.0001775	0.00012929	0.61746	-0.001602	0.00092642	4.113	0.00036745	0.0019004					1.4778	0.00019477	0.15523	3.7417e-11	3.5602	3.6127e-10
1.8482	-0.00076342	0.0011031	0.77769	8.119e-05	0.00098204	4.326	-0.00015883	0.00039553					1.4871	0.00019615	0.1567	3.8608e-11	3.583	3.7188e-10
1.9516	0.00050923	0.00064025	0.94034	-0.00018605	0.00068763	4.5422	9.3194e-05	0.00025748					1.4966	0.00019754	0.15818	3.9836e-11	3.6059	3.8281e-10
2.0565	-0.00054622	0.0014433	1.1055	-0.00019325	0.00066095	4.7616	-0.00025401	0.00020152					1.5061	0.00019895	0.15968	4.1104e-11	3.6289	3.9406e-10
2.163	-0.00057527	0.000909	1.273	0.0005309	0.00056309	4.9844	-0.00051654	0.00047013					1.5157	0.00020036	0.16119	4.2412e-11	3.6521	4.0563e-10
2.2711	-0.0004127	0.0013804	1.4432	-0.00014171	0.00065846	5.2105	-0.00057337	0.00059537					1.5253	0.00020178	0.16271	4.3761e-11	3.6755	4.1754e-10
2.3808	0.0014574	0.0010372	1.6159	8.3135e-05	0.00026807	5.4401	9.1754e-05	0.00019406					1.535	0.00020321	0.16425	4.5153e-11	3.699	4.298e-10
2.4922	0.00045123	0.0015053	1.7912	-0.00063678	0.00025876	5.6731	-0.00063676	0.00071549					1.5447	0.00020465	0.1658	4.659e-11	3.7226	4.4243e-10
2.6053	-0.00016481	0.0012314	1.9691	2.825e-05	0.0007365	5.9096	0.00033877	0.00029719					1.5545	0.00020611	0.16737	4.8072e-11	3.7464	4.5541e-10
2.72	-0.00034609	0.001507	2.1497	0.00080491	0.00076239	6.1497	0.00024322	0.00028298					1.5644	0.00020757	0.16895	4.9601e-11	3.7703	4.6878e-10
2.8365	0.0006505	0.0011102	2.3331	-0.00036189	0.000752	6.3934	0.00020608	0.00039873					1.5743	0.00020904	0.17055	5.118e-11	3.7944	4.8254e-10
2.9548	-0.0010261	0.00037049	2.5192	-0.00061658	0.00043373	6.6408	-4.3615e-05	0.0005519					1.5843	0.00021052	0.17216	5.2808e-11	3.8187	4.967e-10
3.0749	-0.00088325	0.00097962	2.7081	-0.0012422	0.00095421	6.892	-0.00016996	0.00076869					1.5944	0.00021201	0.17379	5.4488e-11	3.8431	5.1128e-10
3.1967	0.00010801	0.00033104	2.8999	0.00015164	0.00056442	7.1469	-0.00047814	0.0010069					1.6045	0.00021352	0.17543	5.6221e-11	3.8676	5.2628e-10
3.3204	0.00078044	0.0012005	3.0946	-0.00069091	0.0012121	7.4057	0.00022586	0.00052616					1.6147	0.00021503	0.17709	5.801e-11	3.8924	5.4172e-10
3.446	-0.00039529	0.0014788	3.2922	-2.1067e-05	0.00056723	7.6683	0.00086082	0.00084547					1.625	0.00021655	0.17877	5.9855e-11	3.9172	5.5761e-10
3.5735	0.0011768	0.00085967	3.4928	0.00020591	0.00080522	7.935	0.00074078	0.00090915					1.6353	0.00021809	0.18046	6.1759e-11	3.9423	5.7396e-10
3.7028	-5.8494e-05	0.0015135	3.6964	-3.7159e-05	0.00082327	8.2056	-0.00088659	0.0010433					1.6457	0.00021963	0.18216	6.3724e-11	3.9675	5.9079e-10
3.8342	0.000408	0.0010698	3.9032	-0.00075023	0.0012107	8.4804	-1.292e-05	0.00040983					1.6561	0.00022119	0.18388	6.5751e-11	3.9928	6.0811e-10
3.9675	0.0011637	0.0010672	4.113	0.00015885	0.00099133	8.7593	-0.00011703	0.00095434					1.6666	0.00022276	0.18562	6.7843e-11	4.0183	6.2594e-10
4.1028	0.00029736	0.0013734	4.326	0.00030234	0.00043602	9.0424	0.00035844	0.0003					1.6772	0.00022434	0.18738	7e-11	4.044	6.4429e-10
4.2402	0.00022307	0.00078925	4.5422	0.00051985	0.00050264	9.3298	9.5724e-05	0.00051162					1.6879	0.00022593	0.18915	7.2227e-11	4.0699	6.6317e-10
4.3796	0.00096931	0.00066742	4.7616	-0.0002132	0.00081651	9.6215	0.00021764	0.00084249					1.6986	0.00022753	0.19094	7.4525e-11	4.0959	6.8261e-10
4.5212	0.00063418	0.00067349	4.9844	0.00094331	0.00078274	9.9176	0.00022319	0.00075631					1.7094	0.00022914	0.19274	7.6895e-11	4.1221	7.0261e-10
4.6649	0.00097311	0.00071822	5.2105	-4.5524e-05	0.00098086	10.218	2.1554e-05	0.00066604					1.7202	0.00023076	0.19457	7.9341e-11	4.1484	7.2319e-10
4.8107	6.6753e-05	0.0011294	5.4401	8.7792e-05	0.00073772	10.523	-9.0534e-05	0.0004184					1.7312	0.00023239	0.19641	8.1865e-11	4.1749	7.4438e-10
4.9588	0.00074275	0.0012232	5.6731	-0.00015617	0.0007709	10.833	-0.00010385	0.0010866					1.7422	0.00023404	0.19826	8.4468e-11	4.2016	7.6618e-10
5.1091	0.00096772	0.00054137	5.9096	-0.00017393	0.00043853	11.147	8.0423e-05	0.00089296					1.7532	0.0002357	0.20014	8.7155e-11	4.2284	7.8862e-10
5.2617	0.0011476	0.00081997	6.1497	1.3477e-05	0.0013883	11.467	0.00080906	0.00042879					1.7644	0.00023736	0.20203	8.9927e-11	4.2555	8.1171e-10
5.4165	0.00069104	0.0011011	6.3934	0.00020806	0.00055919	11.79	0.00076436	0.00058544					1.7756	0.00023904	0.20394	9.2787e-11	4.2827	8.3548e-10
5.5737	0.0011351	0.0013115	6.6408	0.00060147	0.00062492	12.119	0.00030599	0.00018649					1.7868	0.00024073	0.20587	9.5738e-11	4.31	8.5994e-10
5.7333	0.0014463	0.00015439	6.892	0.00028732	0.00068321	12.453	-0.00020455	0.00051717					1.7982	0.00024244	0.20781	9.8783e-11	4.3376	8.8511e-10
5.8953	0.00047659	0.0013888	7.1469	-3.2379e-06	8.6963e-05	12.792	0.00058307	0.00050292					1.8096	0.00024415	0.20978	1.0192e-10	4.3653	9.1101e-10
6.0597	0.0010059	0.0019274	7.4057	-0.00034468	0.00044719	13.136	-0.00018191	0.00085573					1.8211	0.00024588	0.21176	1.0517e-10	4.3932	9.3767e-10
6.2266	0.00097644	0.00067427	7.6683	0.00028177	0.00089564	13.485	-0.0002591	0.00085855					1.8327	0.00024762	0.21376	1.0851e-10	4.4213	9.6511e-10
6.396	0.001102	0.0009125	7.935	0.00012055	0.0006234	13.84	-0.00025469	0.0008187					1.8443	0.00024937	0.21579	1.1196e-10	4.4495	9.9334e-10
6.568	8.4733e-05	0.0005949	8.2056	0.00011992	0.00028308	14.199	0.00041483	0.0010958					1.856	0.00025114	0.21783	1.1552e-10	4.478	1.0224e-09
6.7426	0.001409	0.0010397	8.4804	-0.00018405	0.0010717	14.565	-0.00035128	0.00028354					1.8678	0.00025291	0.21988	1.192e-10	4.5066	1.0523e-09
6.9198	0.0014227	0.00060554	8.7593	0.00084954	0.00043228	14.935	-1.7106e-06	0.0010048					1.8797	0.0002547	0.22196	1.2298e-10	4.5354	1.0831e-09
7.0997	0.0013431	0.00069693	9.0424	0.00064756	0.00076698	15.312	-0.00024753	0.00017651					1.8916	0.0002565	0.22406	1.2689e-10	4.5644	1.1147e-09
7.2823	0.0020634	0.0013966	9.3298	9.9855e-05	0.00066953	15.694	0.00019065	0.00046221					1.9036	0.00025831	0.22618	1.3093e-10	4.5936	1.1473e-09
7.4676	0.0015878	0.00067121	9.6215	2.4436e-05	0.00041083	16.081	-0.00022118	0.0011737					1.9157	0.00026014	0.22832	1.3509e-10	4.6229	1.1809e-09
7.6558	0.00086236	0.00062583	9.9176	0.00041119	0.00044429	16.475	-0.00017827	0.00065225					1.9279	0.00026198	0.23048	1.3939e-10	4.6525	1.2154e-09
7.8468	0.00071688	0.000312	10.218	3.5826e-05	0.0015062	16.875	-0.00053383	0.00070855					1.9401	0.00026383	0.23266	1.4382e-10	4.6822	1.2509e-09
8.0407	0.001735	0.00056699	10.523	-0.00022371	0.00038299	17.28	-0.0002607	0.00024853					1.9524	0.00026569	0.23486	1.4839e-10	4.7121	1.2875e-09
8.2375	0.0010032	0.0012081	10.833	-0.000102	0.00084446	17.692	-0.0001439	0.00069774					1.9648	0.00026757	0.23708	1.5311e-10	4.7422	1.3251e-09
8.4372	0.0010991	0.00053053	11.147	-0.00010713	0.00081838	18.11	-0.00022194	0.00067778					1.9773	0.00026946	0.23932	1.5798e-10	4.7725	1.3638e-09
8.64	0.0016414	0.00068564	11.467	-0.00012048	0.00053603	18.534	9.192e-05	0.00045236					1.9899	0.00027136	0.24158	1.63e-10	4.803	1.4036e-09
8.8459	0.0010736	0.0016242	11.79	-0.00033469	0.0005014	18.965	0.00010797	0.00052863					2.0025	0.00027328	0.24387	1.6818e-10	4.8337	1.4446e-09
9.0548	0.0012706	0.0012151	12.119	0.00026308	0.00035985	19.402	0.00088235	0.00069806					2.0152	0.00027521	0.24617	1.7353e-10	4.8646	1.4868e-09
9.2669	0.00033938	0.00095044	12.453	0.00054389	0.0001951	19.845	0.00026713	0.00073652					2.028	0.00027715	0.2485	1.7905e-10	4.8957	1.5302e-09
9.4822	0.00072455	0.00062146	12.792	0.00024619	0.00065513	20.296	7.3849e-05	0.00077128					2.0409	0.00027911	0.25085	1.8474e-10	4.927	1.5749e-09
9.7008	0.0014248	0.0009997	13.136	0.00041514	0.00052249	20.753	0.00021888	0.00082408					2.0539	0.00028108	0.25322	1.9061e-10	4.9585	1.6209e-09
9.9227	0.0015944	0.00081499	13.485	0.00054914	0.0010427	21.217	0.00034533	0.00013509					2.0669	0.00028306	0.25561	1.9667e-10	4.9902	1.6682e-09
10.148	0.0018166	0.00056546	13.84	0.00021875	0.00082084	21.688	-7.9817e-06	0.00033827					2.0801	0.00028506	0.25803	2.0292e-10	5.0221	1.7169e-09
10.376	0.0013806	0.00097266	14.199	0.00025938	0.00033805	22.166	6.3717e-05	0.00035205					2.0933	0.00028707	0.26047	2.0938e-10	5.0542	1.767e-09
10.608	0.002154	0.00087767	14.565	0.00040789	0.00076356	22.652	-5.4217e-06	0.00041085					2.1066	0.00028909	0.26293	2.1603e-10	5.0865	1.8185e-09
10.844	0.0018372	0.0011061	14.935	0.00040007	0.0007778	23.145	0.00012391	0.00074012					2.1199	0.00029113	0.26542	2.229e-10	5.119	1.8716e-09
11.083	0.001616	0.00090755	15.312	-3.4951e-05	0.00094326	23.645	0.00019412	0.00074897					2.1334	0.00029318	0.26793	2.2998e-10	5.1517	1.9261e-09
11.326	0.0019395	0.0011092	15.694	0.00092786	0.00073491	24.153	-0.00017309	0.00058274					2.1469	0.00029525	0.27046	2.3729e-10	5.1846	1.9823e-09
11.572	0.0027304	0.00050401	16.081	0.0006517	0.00077345	24.668	0.00028622	0.0010122					2.1606	0.00029733	0.27302	2.4483e-10	5.2178	2.0401e-09
11.822	0.0017472	0.00049988	16.475	0.00050578	0.00056407	25.191	-4.1087e-05	0.0012783					2.1743	0.00029943	0.2756	2.5262e-10	5.2511	2.0996e-09
12.076	0.0017814	0.00066825	16.875	0.0008323	0.00043142	25.722	-0.00049117	0.00037829					2.1881	0.00030154	0.2782	2.6064e-10	5.2847	2.1608e-09
12.334	0.0019682	0.00062929	17.28	0.00033292	0.00044902	26.261	-0.0002353	0.00071238					2.202	0.00030366	0.28084	2.6893e-10	5.3184	2.2238e-09
12.595	0.0012523	0.00047857	17.692	0.00064809	0.00033927	26.809	-0.00024174	0.00060717					2.216	0.0003058	0.28349	2.7747e-10	5.3524	2.2886e-09
12.861	0.0014777	0.00055648	18.11	0.00046066	0.00072142	27.364	-0.00027857	0.00016363					2.2301	0.00030796	0.28617	2.8629e-10	5.3866	2.3553e-09
13.131	0.0010912	0.0004189	18.534	6.9628e-05	0.000699	27.928	0.00044744	0.00059071					2.2442	0.00031013	0.28888	2.9539e-10	5.4211	2.4239e-09
13.404	0.001824	0.00071811	18.965	0.00071707	0.00061715	28.5	-0.00036603	0.00034281					2.2585	0.00031231	0.29161	3.0478e-10	5.4557	2.4945e-09
13.682	0.0014946	0.00031127	19.402	0.00089724	0.00047721	29.081	-0.0003279	0.00051504					2.2728	0.00031451	0.29436	3.1446e-10	5.4906	2.5672e-09
13.964	0.0019648	0.00090322	19.845	0.00065147	0.00053105	29.671	0.00012145	0.0007712					2.2873	0.00031673	0.29715	3.2445e-10	5.5257	2.6419e-09
14.25	0.0024637	0.00024697	20.296	0.00040822	0.00054927	30.27	-1.3111e-05	0.00031245					2.3018	0.00031895	0.29996	3.3476e-10	5.561	2.7189e-09
14.541	0.0022135	0.00073353	20.753	0.00082412	0.00044308	30.878	0.00041798	0.00042958					2.3164	0.0003212	0.30279	3.454e-10	5.5965	2.798e-09
14.835	0.0025262	0.0006819	21.217	0.00085148	0.00044699	31.494	0.00029886	0.00028417					2.3311	0.00032346	0.30566	3.5637e-10	5.6323	2.8795e-09
15.135	0.0029477	0.00022067	21.688	0.00029588	0.00076139	32.121	1.0785e-05	0.00029146					2.3459	0.00032574	0.30855	3.677e-10	5.6683	2.9633e-09
15.439	0.001593	0.00069754	22.166	0.00085054	0.00020706	32.756	0.00072172	0.00031433					2.3608	0.00032803	0.31146	3.7938e-10	5.7045	3.0495e-09
15.747	0.002481	0.0002435	22.652	0.001118	0.00062051	33.402	6.312e-05	0.00059786					2.3758	0.00033034	0.31441	3.9143e-10	5.741	3.1383e-09
16.06	0.0023433	0.00073566	23.145	0.00061076	0.00046819	34.056	6.1955e-05	0.00042714					2.3909	0.00033266	0.31738	4.0387e-10	5.7777	3.2296e-09
16.378	0.0027425	0.00036391	23.645	0.0009463	0.00070486	34.721	6.6212e-05	0.00055686					2.4061	0.000335	0.32038	4.167e-10	5.8146	3.3236e-09
16.701	0.0026449	0.00089198	24.153	0.00084848	0.00055929	35.396	0.00034716	0.00034046					2.4214	0.00033736	0.32341	4.2994e-10	5.8518	3.4202e-09
17.028	0.0020942	0.00080719	24.668	0.00025034	0.00064811	36.081	0.00010457	0.00065392					2.4367	0.00033973	0.32647	4.4359e-10	5.8892	3.5197e-09
17.361	0.0031519	0.0014455	25.191	0.00078811	0.00029121	36.777	3.8331e-05	0.00058305					2.4522	0.00034211	0.32955	4.5769e-10	5.9268	3.622e-09
17.698	0.0026711	0.00017544	25.722	0.00051817	0.00059225	37.483	4.2155e-05	0.00057069					2.4678	0.00034452	0.33267	4.7222e-10	5.9647	3.7274e-09
18.041	0.0023616	0.00094818	26.261	0.0010907	0.00025892	38.199	-2.7225e-05	0.00047337					2.4835	0.00034694	0.33582	4.8722e-10	6.0028	3.8357e-09
18.388	0.0026271	0.00081187	26.809	0.00083253	0.00061367	38.927	-0.00019096	0.00043688					2.4992	0.00034938	0.33899	5.027e-10	6.0412	3.9472e-09
18.741	0.002498	0.0012872	27.364	0.00056306	0.00033715	39.665	0.0002974	0.00043116					2.5151	0.00035183	0.3422	5.1867e-10	6.0798	4.0619e-09
19.1	0.0030354	0.0012584	27.928	0.00058732	0.00014363	40.415	-1.0831e-05	0.0005241					2.5311	0.0003543	0.34543	5.3514e-10	6.1186	4.18e-09
19.463	0.0028711	0.00031851	28.5	0.00136	0.0002681	41.175	0.00030803	0.00042208					2.5472	0.00035679	0.3487	5.5214e-10	6.1577	4.3014e-09
19.833	0.0033022	0.00075617	29.081	0.0007471	0.00047233	41.948	-0.00038993	0.00076249					2.5633	0.0003593	0.35199	5.6967e-10	6.1971	4.4264e-09
20.207	0.0023722	0.00083323	29.671	0.0010847	0.00018488	42.732	-9.7744e-05	0.0006835					2.5796	0.00036182	0.35532	5.8776e-10	6.2367	4.5549e-09
20.588	0.0020161	0.0007018	30.27	0.00087167	0.00079551	43.528	0.00019147	0.00045819					2.596	0.00036436	0.35868	6.0643e-10	6.2766	4.6872e-09
20.974	0.0034539	0.00057924	30.878	0.0012072	0.0005182	44.335	9.4269e-05	0.00041703					2.6125	0.00036691	0.36207	6.2569e-10	6.3167	4.8233e-09
21.366	0.0028226	0.00095882	31.494	0.0012736	0.00044251	45.155	5.6808e-05	0.00058951					2.6291	0.00036949	0.36549	6.4556e-10	6.357	4.9634e-09
21.764	0.0029461	6.9954e-05	32.121	0.0010889	0.00061698	45.988	-5.426e-05	0.00063104					2.6458	0.00037208	0.36895	6.6606e-10	6.3977	5.1075e-09
22.168	0.0029039	0.0004096	32.756	0.00096789	0.00050597	46.833	-3.392e-05	0.0004853					2.6626	0.00037469	0.37244	6.8721e-10	6.4386	5.2557e-09
22.578	0.0026881	0.00044484	33.402	0.0011013	0.00040335	47.69	0.00016564	0.00069426					2.6795	0.00037732	0.37596	7.0903e-10	6.4797	5.4082e-09
22.994	0.0030195	0.0007216	34.056	0.0010646	0.00031589	48.561	0.00016333	0.00034462					2.6965	0.00037996	0.37951	7.3154e-10	6.5211	5.5652e-09
23.416	0.0035881	0.0010444	34.721	0.0015691	0.00024053	49.445	-5.6957e-05	0.000168					2.7136	0.00038263	0.3831	7.5476e-10	6.5628	5.7266e-09
23.845	0.0028276	0.00062344	35.396	0.0012718	0.00037725	50.342	0.00056431	0.00047461					2.7309	0.00038531	0.38672	7.7873e-10	6.6047	5.8927e-09
24.281	0.0034525	0.00042568	36.081	0.0016033	0.00069294	51.252	2.2562e-05	0.0005548					2.7482	0.00038801	0.39038	8.0345e-10	6.6469	6.0637e-09
24.722	0.0037287	0.00025383	36.777	0.0011879	0.00028282	52.177	0.00035339	0.00032576					2.7657	0.00039073	0.39407	8.2896e-10	6.6894	6.2395e-09
25.171	0.0033682	0.00068653	37.483	0.0016183	0.00054234	53.115	0.00097606	0.00060019					2.7832	0.00039347	0.3978	8.5527e-10	6.7322	6.4204e-09
25.626	0.0037578	0.00099467	38.199	0.0014698	0.00052871	54.068	0.00012444	0.00063542					2.8009	0.00039622	0.40156	8.8242e-10	6.7752	6.6066e-09
26.088	0.003507	0.0005702	38.927	0.001969	0.00049915	55.035	6.0762e-05	0.00060126					2.8187	0.000399	0.40536	9.1043e-10	6.8185	6.7981e-09
26.558	0.0040265	0.00026792	39.665	0.0022443	0.00031595	56.016	-0.00030024	0.00052855					2.8366	0.00040179	0.40919	9.3933e-10	6.8621	6.9951e-09
27.034	0.0039243	0.00048401	40.415	0.0019663	0.00011144	57.012	0.00025125	0.00020681					2.8546	0.0004046	0.41306	9.6915e-10	6.9059	7.1978e-09
27.517	0.0033334	0.00081374	41.175	0.0017938	0.00072421	58.023	0.0003736	0.00050188					2.8727	0.00040744	0.41696	9.9991e-10	6.9501	7.4064e-09
28.008	0.0037303	0.00045111	41.948	0.0021553	0.00041345	59.05	0.0001176	0.00075874					2.891	0.00041029	0.4209	1.0316e-09	6.9945	7.6209e-09
28.506	0.0040485	0.00058052	42.732	0.002076	0.00018635	60.092	-0.00016277	0.00062828					2.9093	0.00041316	0.42488	1.0644e-09	7.0392	7.8416e-09
29.012	0.0040584	0.00039759	43.528	0.0017229	0.00076881	61.15	-3.7164e-05	0.00053151					2.9278	0.00041605	0.4289	1.0982e-09	7.0842	8.0687e-09
29.525	0.0041577	0.00025499	44.335	0.0021648	0.00020351	62.224	-0.00017274	0.00069011					2.9464	0.00041896	0.43296	1.133e-09	7.1295	8.3024e-09
30.046	0.0043375	0.0007389	45.155	0.0016962	0.0005845	63.314	9.95e-05	0.00040168					2.9651	0.00042189	0.43705	1.169e-09	7.175	8.5427e-09
30.575	0.0047544	0.00065568	45.988	0.0017553	0.00053608	64.42	-0.00027456	0.00047629					2.984	0.00042484	0.44118	1.2061e-09	7.2209	8.79e-09
31.112	0.0042839	0.00041815	46.833	0.0019904	0.00068181	65.543	-0.00020055	0.00045875					3.0029	0.00042781	0.44535	1.2443e-09	7.267	9.0444e-09
31.657	0.0046998	0.00041389	47.69	0.0025393	0.00026377	66.683	-7.8827e-05	0.00050181					3.022	0.0004308	0.44956	1.2838e-09	7.3135	9.3062e-09
32.21	0.0045773	0.0010591	48.561	0.0029624	0.00044643	67.84	0.00023267	0.00055708					3.0412	0.00043381	0.45381	1.3246e-09	7.3602	9.5754e-09
32.772	0.0042865	0.00037643	49.445	0.0024687	0.00058944	69.015	0.00044467	0.00036546					3.0605	0.00043684	0.4581	1.3666e-09	7.4073	9.8525e-09
33.342	0.0039944	0.00044426	50.342	0.0026996	0.00050982	70.208	0.00014918	0.0008438					3.0799	0.00043989	0.46244	1.4099e-09	7.4546	1.0137e-08
33.92	0.0044076	0.00070488	51.252	0.0028994	0.00029996	71.418	0.00035387	0.000437					3.0995	0.00044296	0.46681	1.4547e-09	7.5022	1.0431e-08
34.508	0.0044659	0.00081336	52.177	0.0029671	0.00074278	72.647	0.00013054	0.00030623					3.1192	0.00044605	0.47122	1.5008e-09	7.5502	1.0732e-08
35.104	0.0048397	0.00077975	53.115	0.0029602	0.00051757	73.894	0.00038288	0.00031168					3.139	0.00044917	0.47568	1.5484e-09	7.5984	1.1043e-08
35.709	0.0047652	0.00063413	54.068	0.0028025	0.00041708	75.16	0.00050921	0.00064698					3.1589	0.0004523	0.48017	1.5975e-09	7.647	1.1362e-08
36.323	0.0045366	0.0006547	55.035	0.002865	0.00032189	76.445	0.00045716	0.00059653					3.179	0.00045546	0.48471	1.6482e-09	7.6959	1.169e-08
36.947	0.0049228	0.00046053	56.016	0.0032389	0.00035336	77.75	0.00056206	0.0006015					3.1992	0.00045863	0.4893	1.7005e-09	7.7451	1.2028e-08
37.58	0.0047562	0.00066869	57.012	0.0028869	0.00044421	79.074	0.00050358	0.00074672					3.2195	0.00046183	0.49392	1.7544e-09	7.7946	1.2375e-08
38.223	0.0052265	0.0006642	58.023	0.0031617	0.00036847	80.418	0.00084348	0.0011078					3.2399	0.00046505	0.49859	1.81e-09	7.8444	1.2733e-08
38.875	0.0053266	0.00065474	59.05	0.0035122	0.00030989	81.783	0.00057862	0.0010818					3.2605	0.00046829	0.50331	1.8675e-09	7.8945	1.3101e-08
39.537	0.0050506	0.00016858	60.092	0.0036151	0.0007733	83.168	0.00040872	0.00011603					3.2812	0.00047156	0.50806	1.9267e-09	7.945	1.3479e-08
40.209	0.0055841	0.00041216	61.15	0.0034	0.00021498	84.574	0.0002052	0.0005599					3.302	0.00047484	0.51287	1.9878e-09	7.9957	1.3868e-08
40.891	0.0053088	0.00078435	62.224	0.0038532	0.00050485	86.001	0.00034999	0.0004311					3.323	0.00047815	0.51772	2.0508e-09	8.0468	1.4269e-08
41.584	0.0049155	0.00090091	63.314	0.0040429	0.00043297	87.45	6.6605e-05	0.00068404					3.3441	0.00048148	0.52261	2.1158e-09	8.0983	1.4681e-08
42.287	0.0056439	0.00088444	64.42	0.0038838	0.00061063	88.921	0.00019552	0.00079065					3.3654	0.00048484	0.52755	2.1829e-09	8.15	1.5104e-08
43.001	0.0051963	0.00081633	65.543	0.0042706	0.00035447	90.414	-0.00019557	0.00026553					3.3867	0.00048821	0.53254	2.2521e-09	8.2021	1.554e-08
43.725	0.0053164	0.00077967	66.683	0.0042531	0.00061035	91.929	0.00015714	0.00058368					3.4082	0.00049161	0.53758	2.3235e-09	8.2545	1.5988e-08
44.46	0.0060535	0.00016479	67.84	0.0041509	0.00050115	93.467	0.00054098	8.7836e-05					3.4299	0.00049503	0.54266	2.3972e-09	8.3073	1.6449e-08
45.207	0.0058791	0.00083014	69.015	0.0043494	0.00030424	95.029	0.00076486	0.00054815					3.4517	0.00049848	0.54779	2.4732e-09	8.3604	1.6924e-08
45.965	0.0062053	0.00061847	70.208	0.0045704	0.00028816	96.614	0.00097708	0.00056625					3.4736	0.00050194	0.55297	2.5516e-09	8.4138	1.7412e-08
46.734	0.0055109	0.00050375	71.418	0.0047619	0.00046043	98.223	0.00061773	0.000556					3.4957	0.00050543	0.5582	2.6325e-09	8.4676	1.7914e-08
47.514	0.0057848	0.00071001	72.647	0.004768	0.00025854	99.856	0.00039743	0.000295					3.5179	0.00050895	0.56347	2.7159e-09	8.5217	1.843e-08
48.307	0.0058193	0.00052162	73.894	0.0047496	0.00027559	101.51	0.00065144	0.00051481					3.5402	0.00051249	0.5688	2.802e-09	8.5762	1.8962e-08
49.111	0.0061669	0.00072953	75.16	0.0049044	0.0002809	103.2	0.00077065	0.00014431					3.5627	0.00051605	0.57418	2.8908e-09	8.631	1.9508e-08
49.928	0.0059514	0.00067422	76.445	0.0052034	0.00074623	104.9	0.00086764	0.00032211					3.5853	0.00051963	0.57961	2.9824e-09	8.6861	2.007e-08
50.757	0.0062783	0.00070367	77.75	0.0050529	0.00061595	106.64	0.00057315	0.00037051					3.6081	0.00052324	0.58509	3.0769e-09	8.7417	2.0648e-08
51.598	0.0059795	0.00053391	79.074	0.0052916	0.00045627	108.4	0.001146	0.00038867					3.631	0.00052688	0.59062	3.1744e-09	8.7975	2.1243e-08
52.453	0.0064353	0.00076606	80.418	0.0056947	0.00053156	110.19	0.00091266	0.00033749					3.654	0.00053054	0.5962	3.275e-09	8.8538	2.1855e-08
53.32	0.0065159	0.00053831	81.783	0.0060621	0.00034674	112	0.00084654	0.00061985					3.6773	0.00053422	0.60184	3.3787e-09	8.9103	2.2484e-08
54.2	0.0065297	0.00064685	83.168	0.0059874	0.00049058	113.84	0.0012525	0.00021049					3.7006	0.00053793	0.60753	3.4858e-09	8.9673	2.3131e-08
55.093	0.0065087	0.00045219	84.574	0.0064281	0.00071505	115.71	0.00087989	0.00021311					3.7241	0.00054166	0.61327	3.5962e-09	9.0246	2.3797e-08
56	0.0067253	0.0001322	86.001	0.0064708	0.00051858	117.61	0.00096125	0.00029504					3.7478	0.00054542	0.61907	3.7101e-09	9.0823	2.4481e-08
56.921	0.0065511	0.00044799	87.45	0.0061036	0.00019554	119.53	0.0011938	0.00031862					3.7716	0.0005492	0.62493	3.8276e-09	9.1403	2.5186e-08
57.855	0.0071231	0.00045382	88.921	0.0068	0.00035733	121.49	0.00080105	0.00063279					3.7955	0.00055301	0.63083	3.9489e-09	9.1987	2.591e-08
58.804	0.0067558	0.0010428	90.414	0.0067956	0.0003154	123.47	0.0010594	0.00037697					3.8196	0.00055684	0.6368	4.074e-09	9.2575	2.6655e-08
59.766	0.0072379	0.0005731	91.929	0.00701	0.00039831	125.49	0.001016	0.00037594					3.8439	0.0005607	0.64282	4.203e-09	9.3167	2.7422e-08
60.744	0.0067935	0.00054502	93.467	0.0071971	0.0003664	127.53	0.0013481	0.00023775					3.8683	0.00056458	0.6489	4.3361e-09	9.3762	2.821e-08
61.736	0.006743	0.0004682	95.029	0.0073256	0.0003175	129.61	0.0010612	0.00033469					3.8929	0.00056849	0.65503	4.4734e-09	9.4362	2.9021e-08
62.743	0.0069517	0.00028976	96.614	0.0074398	0.00034466	131.71	0.0014545	0.00021782					3.9176	0.00057243	0.66122	4.6151e-09	9.4965	2.9855e-08
63.766	0.0072155	0.0007598	98.223	0.0072893	0.00030546	133.85	0.0013077	0.00038514					3.9425	0.00057639	0.66748	4.7612e-09	9.5572	3.0713e-08
64.803	0.0068817	0.00063733	99.856	0.0076939	0.00055915	136.02	0.0013554	0.00046456					3.9675	0.00058038	0.67379	4.9119e-09	9.6182	3.1596e-08
65.857	0.0072707	0.00041251	101.51	0.0078409	0.00055056	138.23	0.0015811	0.00059345					3.9927	0.0005844	0.68016	5.0675e-09	9.6797	3.2503e-08
66.926	0.0071745	0.00091989	103.2	0.0084154	0.00026345	140.46	0.0014687	0.00037807					4.0181	0.00058844	0.68659	5.2279e-09	9.7416	3.3437e-08
68.012	0.007293	0.00032495	104.9	0.0085525	0.00043334	142.74	0.0016386	0.00035589					4.0436	0.00059251	0.69308	5.3934e-09	9.8038	3.4397e-08
69.113	0.0072081	0.00060428	106.64	0.0087735	0.00053053	145.04	0.001698	0.00033571					4.0693	0.00059661	0.69963	5.5641e-09	9.8665	3.5384e-08
70.232	0.0075061	0.00048108	108.4	0.008878	0.00064294	147.38	0.0018433	0.00053931					4.0951	0.00060073	0.70625	5.7402e-09	9.9296	3.64e-08
71.367	0.0073309	0.00081261	110.19	0.0092124	0.00027425	149.75	0.0016395	0.00034565					4.1211	0.00060488	0.71292	5.9219e-09	9.993	3.7444e-08
72.52	0.0074541	0.00066601	112	0.0090105	0.00028436	152.16	0.0019305	0.00060234					4.1473	0.00060906	0.71966	6.1093e-09	10.057	3.8519e-08
73.69	0.0074996	0.00061081	113.84	0.0094498	0.00047737	154.61	0.0019802	0.00065757					4.1736	0.00061327	0.72647	6.3026e-09	10.121	3.9624e-08
74.877	0.0076222	0.00080198	115.71	0.0097816	0.0003354	157.1	0.0019796	0.00042113					4.2001	0.0006175	0.73334	6.5021e-09	10.186	4.076e-08
76.083	0.0075606	0.0008459	117.61	0.0098851	0.00053132	159.62	0.0021737	0.00049192					4.2268	0.00062176	0.74027	6.7078e-09	10.251	4.1929e-08
77.306	0.0072537	0.0008337	119.53	0.010134	0.00058921	162.18	0.0022442	0.00045267					4.2536	0.00062605	0.74727	6.92e-09	10.316	4.3131e-08
78.548	0.0075379	0.00081147	121.49	0.010414	0.00020275	164.78	0.0023261	0.00032605					4.2807	0.00063037	0.75433	7.139e-09	10.382	4.4367e-08
79.809	0.0077064	0.00042016	123.47	0.010671	0.00039261	167.41	0.0021136	0.00055878					4.3078	0.00063472	0.76147	7.3648e-09	10.449	4.5639e-08
81.089	0.0079956	0.00079615	125.49	0.010685	0.00030768	170.09	0.0023336	0.0003402					4.3352	0.0006391	0.76867	7.5978e-09	10.516	4.6946e-08
82.388	0.0075884	0.00070485	127.53	0.011002	0.00043973	172.81	0.0027156	0.00027216					4.3627	0.0006435	0.77593	7.8381e-09	10.583	4.8291e-08
83.707	0.0079348	0.00081347	129.61	0.011213	0.00060879	175.57	0.0025756	0.00042139					4.3904	0.00064794	0.78327	8.0861e-09	10.65	4.9674e-08
85.046	0.0076403	0.00087151	131.71	0.011458	0.00069206	178.37	0.0026906	0.00040456					4.4183	0.0006524	0.79067	8.3418e-09	10.718	5.1097e-08
86.405	0.0075535	0.00079342	133.85	0.011548	0.00077163	181.21	0.0029621	0.00040037					4.4464	0.00065689	0.79815	8.6056e-09	10.787	5.256e-08
87.784	0.007472	0.00035358	136.02	0.011675	0.00047454	184.1	0.0029586	0.00045549					4.4746	0.00066141	0.8057	8.8777e-09	10.856	5.4064e-08
89.185	0.0077865	0.0007443	138.23	0.012371	0.0006317	187.03	0.0028939	0.00038576					4.503	0.00066597	0.81331	9.1584e-09	10.925	5.5611e-08
90.606	0.0079777	0.00085715	140.46	0.012165	0.00074705	190	0.0032515	0.00029178					4.5316	0.00067055	0.821	9.448e-09	10.995	5.7203e-08
92.049	0.0080851	0.00052379	142.74	0.012419	0.00024864	193.02	0.0032906	0.00029413					4.5604	0.00067516	0.82877	9.7467e-09	11.065	5.8839e-08
93.513	0.0077315	0.00086791	145.04	0.012751	0.00042655	196.08	0.0032581	0.00043204					4.5894	0.00067981	0.8366	1.0055e-08	11.136	6.0522e-08
95	0.0077444	0.00075303	147.38	0.013162	0.00045307	199.19	0.0036611	0.00063441					4.6185	0.00068448	0.84451	1.0373e-08	11.207	6.2252e-08
96.509	0.0076874	0.00069723	149.75	0.013185	0.0010457	202.35	0.0037753	0.00019787					4.6479	0.00068918	0.85249	1.0701e-08	11.279	6.4032e-08
98.041	0.0079404	0.000835	152.16	0.013394	0.00054233	205.55	0.0038965	0.00042202					4.6774	0.00069392	0.86055	1.1039e-08	11.351	6.5862e-08
99.596	0.007813	0.00078832	154.61	0.013472	0.00080182	208.81	0.0040492	0.00041182					4.7071	0.00069868	0.86869	1.1388e-08	11.423	6.7745e-08
101.18	0.0081025	0.0007404	157.1	0.013677	0.00058919	212.11	0.00412	0.00048898					4.737	0.00070348	0.8769	1.1747e-08	11.496	6.968e-08
102.78	0.0078653	0.0010323	159.62	0.013912	0.00058864	215.46	0.0042305	0.00045963					4.7671	0.00070831	0.8852	1.2119e-08	11.57	7.167e-08
104.4	0.0080234	0.00061353	162.18	0.01431	0.0007648	218.86	0.004422	0.00038643					4.7973	0.00071317	0.89356	1.2502e-08	11.644	7.3717e-08
106.05	0.0078185	0.00031185	164.78	0.014259	0.00075142	222.32	0.0046101	0.00057391					4.8278	0.00071806	0.90201	1.2896e-08	11.718	7.5822e-08
107.73	0.0077345	0.00070805	167.41	0.014554	0.00081136	225.82	0.0048673	0.00054837					4.8585	0.00072299	0.91054	1.3304e-08	11.793	7.7986e-08
109.43	0.0074927	0.00055655	170.09	0.01457	0.00086625	229.38	0.0048329	0.00053365					4.8893	0.00072794	0.91915	1.3724e-08	11.869	8.0212e-08
111.16	0.0078291	0.00076927	172.81	0.014812	0.00082154	232.99	0.0050283	0.00048108					4.9204	0.00073293	0.92784	1.4158e-08	11.944	8.2501e-08
112.91	0.0079044	0.0010279	175.57	0.015091	0.00071966	236.66	0.0053601	0.00048017					4.9516	0.00073795	0.93661	1.4605e-08	12.021	8.4854e-08
114.69	0.0077028	0.00089915	178.37	0.015086	0.00070271	240.38	0.0052927	0.00068818					4.9831	0.00074301	0.94547	1.5066e-08	12.098	8.7275e-08
116.5	0.0077895	0.00070544	181.21	0.014809	0.00083129	244.16	0.0054072	0.00044506					5.0147	0.00074809	0.95441	1.5542e-08	12.175	8.9763e-08
118.33	0.0075231	0.00077765	184.1	0.015352	0.00060608	248	0.0056214	0.00074429					5.0466	0.00075321	0.96343	1.6032e-08	12.253	9.2322e-08
120.19	0.0077876	0.00069926	187.03	0.015332	0.00074066	251.89	0.0058918	0.00059373					5.0786	0.00075837	0.97254	1.6539e-08	12.331	9.4954e-08
122.08	0.0074436	0.00071393	190	0.015397	0.00075267	255.85	0.0059855	0.0005053					5.1109	0.00076355	0.98173	1.7061e-08	12.41	9.766e-08
124	0.0076564	0.00060504	193.02	0.015487	0.00064583	259.86	0.0061171	0.00056907					5.1433	0.00076877	0.99102	1.7599e-08	12.489	1.0044e-07
125.95	0.0076441	0.00060509	196.08	0.015516	0.00064577	263.93	0.0064315	0.00064956					5.176	0.00077403	1.0004	1.8155e-08	12.569	1.033e-07
127.92	0.0075672	0.00090805	199.19	0.015956	0.00060246	268.06	0.0065481	0.00045852					5.2089	0.00077932	1.0098	1.8728e-08	12.649	1.0624e-07
129.93	0.0075924	0.00077008	202.35	0.015834	0.00073723	272.26	0.0066198	0.00046922					5.2419	0.00078464	1.0194	1.9319e-08	12.73	1.0927e-07
131.96	0.0077169	0.00053622	205.55	0.01604	0.00048545	276.52	0.0067641	0.00033768					5.2752	0.00079	1.029	1.9928e-08	12.812	1.1238e-07
134.03	0.007308	0.00064117	208.81	0.015843	0.00081625	280.84	0.0068763	0.00066385					5.3087	0.00079539	1.0388	2.0557e-08	12.893	1.1558e-07
136.13	0.0072609	0.00063793	212.11	0.015955	0.00051757	285.23	0.0071204	0.0003713					5.3425	0.00080082	1.0486	2.1206e-08	12.976	1.1887e-07
138.26	0.0074248	0.00065309	215.46	0.015842	0.00073233	289.69	0.007171	0.00052876					5.3764	0.00080628	1.0585	2.1875e-08	13.059	1.2225e-07
140.42	0.0072588	0.00065106	218.86	0.016255	0.00075925	294.21	0.0073364	0.00053482					5.4105	0.00081177	1.0685	2.2565e-08	13.142	1.2572e-07
142.62	0.0071309	0.00044507	222.32	0.015979	0.00079818	298.8	0.0076694	0.0004938					5.4449	0.00081731	1.0786	2.3276e-08	13.226	1.293e-07
144.84	0.006824	0.00048564	225.82	0.016065	0.00059857	303.46	0.0078933	0.00072223					5.4795	0.00082288	1.0888	2.4011e-08	13.311	1.3297e-07
147.1	0.0072195	0.00021514	229.38	0.016058	0.00059159	308.19	0.007939	0.00065965					5.5143	0.00082848	1.0991	2.4768e-08	13.396	1.3675e-07
149.4	0.0067896	0.00061076	232.99	0.01566	0.00081743	312.99	0.0078915	0.00062451					5.5493	0.00083412	1.1095	2.5549e-08	13.481	1.4064e-07
151.73	0.0067831	0.00051115	236.66	0.015649	0.00078198	317.87	0.0081671	0.00062965					5.5845	0.0008398	1.12	2.6354e-08	13.568	1.4463e-07
154.1	0.006693	0.00052809	240.38	0.015522	0.00067555	322.82	0.0081371	0.00047204					5.62	0.00084551	1.1306	2.7185e-08	13.654	1.4874e-07
156.5	0.0067751	0.00048403	244.16	0.015561	0.00070594	327.84	0.0082763	0.00066176					5.6557	0.00085126	1.1413	2.8042e-08	13.742	1.5296e-07
158.93	0.0066712	0.00052773	248	0.015603	0.00077064	332.94	0.0083642	0.000568					5.6916	0.00085705	1.152	2.8926e-08	13.829	1.573e-07
161.41	0.0068313	0.0005313	251.89	0.01532	0.00067292	338.11	0.0085539	0.00059259					5.7278	0.00086287	1.1629	2.9837e-08	13.918	1.6177e-07
163.92	0.0066028	0.0001941	255.85	0.015193	0.0007939	343.37	0.0087795	0.00068985					5.7641	0.00086873	1.1739	3.0777e-08	14.007	1.6635e-07
166.47	0.00643	0.00055743	259.86	0.014963	0.0006995	348.7	0.0086618	0.00051977					5.8007	0.00087463	1.185	3.1747e-08	14.096	1.7107e-07
169.06	0.0062236	0.0005206	263.93	0.01491	0.00064117	354.11	0.0087848	0.00044988					5.8376	0.00088057	1.1962	3.2747e-08	14.186	1.7592e-07
171.68	0.0062261	0.00045387	268.06	0.014662	0.00041523	359.61	0.0087101	0.00045487					5.8747	0.00088654	1.2075	3.3779e-08	14.277	1.8091e-07
174.35	0.0061209	0.00047681	272.26	0.01447	0.00060245	365.19	0.0088271	0.00059722					5.912	0.00089256	1.219	3.4843e-08	14.368	1.8603e-07
177.06	0.0060605	0.00030542	276.52	0.014431	0.00076379	370.85	0.0089429	0.00050027					5.9495	0.00089861	1.2305	3.594e-08	14.46	1.9131e-07
179.8	0.0059448	0.00049083	280.84	0.014271	0.00051358	376.6	0.0089364	0.00042355					5.9873	0.0009047	1.2421	3.7072e-08	14.552	1.9672e-07
182.59	0.00578	0.00053251	285.23	0.014158	0.00060125	382.43	0.0089054	0.00067677					6.0253	0.00091083	1.2539	3.8239e-08	14.645	2.023e-07
185.42	0.0056425	0.0003783	289.69	0.013793	0.00067422	388.35	0.0090346	0.00052832					6.0636	0.00091699	1.2657	3.9443e-08	14.739	2.0802e-07
188.3	0.0054871	0.00044987	294.21	0.01373	0.00061606	394.36	0.0091984	0.00052394					6.1021	0.0009232	1.2777	4.0685e-08	14.833	2.1391e-07
191.21	0.0055737	0.00044198	298.8	0.013381	0.00072007	400.47	0.0090182	0.00069871					6.1408	0.00092945	1.2898	4.1966e-08	14.928	2.1996e-07
194.18	0.0054671	0.00043736	303.46	0.013255	0.00060412	406.66	0.009	0.00055921					6.1798	0.00093573	1.302	4.3286e-08	15.023	2.2618e-07
197.18	0.0055765	0.00031883	308.19	0.01312	0.00072365	412.95	0.0090134	0.00047641					6.2191	0.00094206	1.3143	4.4649e-08	15.119	2.3258e-07
200.23	0.0051548	9.787e-05	312.99	0.012918	0.0007681	419.33	0.0089512	0.00046869					6.2586	0.00094842	1.3267	4.6054e-08	15.216	2.3916e-07
203.33	0.0052015	0.00028513	317.87	0.012687	0.00057658	425.81	0.0090037	0.00038302					6.2983	0.00095483	1.3392	4.7502e-08	15.313	2.4592e-07
206.47	0.0050705	0.00034744	322.82	0.012266	0.00072692	432.39	0.0089183	0.00063263					6.3383	0.00096128	1.3519	4.8997e-08	15.411	2.5287e-07
209.67	0.0049264	0.00035976	327.84	0.011974	0.0005479	439.06	0.0088957	0.00059437					6.3786	0.00096776	1.3647	5.0538e-08	15.51	2.6001e-07
212.9	0.0045282	0.00023055	332.94	0.011601	0.00054902	445.84	0.0087133	0.00039604					6.4191	0.00097429	1.3776	5.2127e-08	15.609	2.6735e-07
216.19	0.0045429	0.00014339	338.11	0.011373	0.00057635	452.72	0.0086466	0.00040407					6.4599	0.00098086	1.3906	5.3767e-08	15.709	2.749e-07
219.53	0.0043784	0.00027841	343.37	0.011113	0.00041089	459.7	0.0086789	0.00041958					6.5009	0.00098748	1.4038	5.5457e-08	15.809	2.8266e-07
222.92	0.0043549	0.00035339	348.7	0.010825	0.00044574	466.79	0.0085815	0.00046463					6.5422	0.00099413	1.417	5.7201e-08	15.91	2.9064e-07
226.36	0.0043863	0.00028084	354.11	0.010794	0.00036505	473.99	0.0083858	0.00061664					6.5837	0.0010008	1.4304	5.8999e-08	16.012	2.9884e-07
229.85	0.0042567	0.00027722	359.61	0.010146	0.00045258	481.29	0.008515	0.00063352					6.6255	0.0010076	1.4439	6.0853e-08	16.114	3.0726e-07
233.4	0.0039648	0.00021803	365.19	0.0099156	0.0004973	488.7	0.008247	0.00070635					6.6676	0.0010143	1.4576	6.2766e-08	16.217	3.1593e-07
236.99	0.0039205	0.00024187	370.85	0.0096136	0.00053726	496.23	0.0081356	0.00055409					6.71	0.0010212	1.4714	6.4738e-08	16.321	3.2483e-07
240.65	0.0040211	0.00034641	376.6	0.0094683	0.00045297	503.87	0.0079941	0.0003857					6.7526	0.001028	1.4853	6.6772e-08	16.425	3.3398e-07
244.35	0.0035443	0.00050878	382.43	0.009242	0.0003612	511.63	0.0077712	0.0004648					6.7955	0.0010349	1.4993	6.887e-08	16.53	3.4339e-07
248.12	0.0035255	0.0004892	388.35	0.0086846	0.00030148	519.5	0.0075493	0.00045502					6.8386	0.0010419	1.5135	7.1033e-08	16.636	3.5306e-07
251.94	0.0033648	0.00045903	394.36	0.0085044	0.00019475	527.49	0.0076225	0.00033336					6.8821	0.0010489	1.5278	7.3264e-08	16.742	3.63e-07
255.81	0.0033015	0.00039406	400.47	0.008324	0.00019474	535.6	0.0074486	0.00044594					6.9258	0.0010559	1.5423	7.5564e-08	16.849	3.7322e-07
259.75	0.0031555	0.0004839	406.66	0.0080092	0.00012905	543.84	0.0073524	0.00035875					6.9697	0.001063	1.5568	7.7937e-08	16.957	3.8372e-07
263.74	0.0031674	0.00048862	412.95	0.0076533	0.00011177	552.19	0.0071142	0.00061891					7.014	0.0010701	1.5716	8.0383e-08	17.065	3.9451e-07
267.8	0.002878	0.00047204	419.33	0.0073908	0.00022181	560.68	0.0067884	0.00053108					7.0586	0.0010773	1.5864	8.2907e-08	17.174	4.0561e-07
271.92	0.0030103	0.00081509	425.81	0.0069691	0.00016135	569.29	0.0066423	0.00062273					7.1034	0.0010845	1.6014	8.5509e-08	17.284	4.1701e-07
276.1	0.002688	0.00069784	432.39	0.0067642	0.00023818	578.03	0.0065977	0.00046667					7.1485	0.0010918	1.6166	8.8192e-08	17.394	4.2873e-07
280.34	0.0024339	0.00052337	439.06	0.0064602	5.6939e-05	586.91	0.0063498	0.00051552					7.1939	0.0010991	1.6318	9.0959e-08	17.505	4.4077e-07
284.64	0.0025486	0.00062658	445.84	0.006074	0.00019662	595.91	0.0061783	0.00030935					7.2396	0.0011064	1.6473	9.3812e-08	17.617	4.5315e-07
289.02	0.0025013	0.00069647	452.72	0.0058574	0.00022701	605.06	0.0059187	0.00043423					7.2856	0.0011138	1.6629	9.6755e-08	17.73	4.6587e-07
293.45	0.0024879	0.00058946	459.7	0.0055886	0.00016057	614.34	0.0057457	0.00038859					7.3318	0.0011213	1.6786	9.9789e-08	17.843	4.7895e-07
297.96	0.0023639	0.00076065	466.79	0.0054136	0.00033861	623.76	0.0054925	0.00041425					7.3784	0.0011287	1.6944	1.0292e-07	17.957	4.9239e-07
302.53	0.002215	0.0008095	473.99	0.0050036	0.00020535	633.33	0.0053981	0.00035162					7.4253	0.0011363	1.7105	1.0615e-07	18.072	5.062e-07
307.17	0.0025299	0.000852	481.29	0.0047942	0.00021461	643.04	0.0053385	0.00021352					7.4724	0.0011439	1.7266	1.0947e-07	18.188	5.204e-07
311.88	0.0020551	0.00072328	488.7	0.0046895	0.00029801	652.89	0.0051401	0.00012663					7.5199	0.0011515	1.743	1.129e-07	18.304	5.3499e-07
316.66	0.0020003	0.00084187	496.23	0.0043611	0.00039355	662.9	0.0049399	0.0002165					7.5676	0.0011592	1.7594	1.1644e-07	18.421	5.4998e-07
321.52	0.0017729	0.00063773	503.87	0.0040141	0.00026159	673.05	0.0048106	0.00034849					7.6157	0.0011669	1.7761	1.2009e-07	18.538	5.6539e-07
326.45	0.0016861	0.00067478	511.63	0.00384	0.00016972	683.36	0.0045601	0.00036201					7.6641	0.0011747	1.7929	1.2385e-07	18.657	5.8122e-07
331.45	0.0017439	0.00042739	519.5	0.0036497	0.0001679	693.82	0.0044103	0.00025479					7.7127	0.0011825	1.8098	1.2773e-07	18.776	5.9749e-07
336.52	0.0016963	0.00077287	527.49	0.0033407	0.0001457	704.44	0.0043969	0.00023696					7.7617	0.0011903	1.8269	1.3173e-07	18.896	6.1421e-07
341.68	0.0016109	0.00097601	535.6	0.0033351	0.00048036	715.22	0.0042131	0.00022466					7.811	0.0011982	1.8442	1.3586e-07	19.017	6.314e-07
346.91	0.0015169	0.0010033	543.84	0.0030982	0.00031694	726.17	0.003974	0.0003081					7.8606	0.0012062	1.8616	1.4011e-07	19.139	6.4906e-07
352.22	0.0012802	0.00089598	552.19	0.0028566	0.00027452	737.28	0.0038982	0.0001961					7.9105	0.0012142	1.8792	1.4449e-07	19.261	6.6721e-07
357.61	0.0012732	0.000435	560.68	0.0026695	0.00039973	748.56	0.0036718	0.00037166					7.9608	0.0012223	1.897	1.4902e-07	19.384	6.8585e-07
363.08	0.0012537	0.00087732	569.29	0.0025116	0.00031784	760.01	0.0035057	0.00026553					8.0113	0.0012304	1.9149	1.5368e-07	19.508	7.0502e-07
368.64	0.0011659	0.00070457	578.03	0.0023364	0.00043147	771.62	0.0032539	0.00033416					8.0622	0.0012385	1.933	1.5849e-07	19.632	7.2471e-07
374.28	0.0011697	0.00095256	586.91	0.0022717	0.00036561	783.42	0.0031741	0.00032832					8.1134	0.0012467	1.9513	1.6344e-07	19.758	7.4494e-07
380	0.0010142	0.00078267	595.91	0.0020995	0.00047553	795.4	0.0029868	0.00024692					8.1649	0.001255	1.9698	1.6856e-07	19.884	7.6574e-07
385.81	0.00079464	0.00074954	605.06	0.0020656	0.00027584	807.55	0.0028115	0.00011835					8.2168	0.0012633	1.9884	1.7383e-07	20.011	7.871e-07
391.71	0.00088586	0.00085573	614.34	0.0019248	0.00045703	819.89	0.0028336	0.00021007					8.269	0.0012717	2.0072	1.7926e-07	20.139	8.0906e-07
397.7	0.00087731	0.00063032	623.76	0.0016957	0.00029253	832.41	0.0025132	0.00026367					8.3215	0.0012801	2.0262	1.8487e-07	20.268	8.3162e-07
403.77	0.00073232	0.00088514	633.33	0.001505	0.00037928	845.12	0.0025798	0.0002111					8.3743	0.0012885	2.0453	1.9064e-07	20.397	8.548e-07
409.94	0.00064434	0.00081505	643.04	0.0014446	0.00042392	858.03	0.0023609	0.00018374					8.4275	0.001297	2.0647	1.966e-07	20.528	8.7861e-07
416.21	0.00058591	0.0007595	652.89	0.0010476	0.000519	871.13	0.0022907	0.00038978					8.481	0.0013056	2.0842	2.0274e-07	20.659	9.0309e-07
422.56	0.00042384	0.0007514	662.9	0.0010152	0.00032463	884.43	0.0021522	0.00015167					8.5349	0.0013142	2.1039	2.0907e-07	20.791	9.2823e-07
429.02	0.00039575	0.00082517	673.05	0.0010353	0.00037938	897.92	0.0020938	0.00024728					8.5891	0.0013229	2.1238	2.156e-07	20.924	9.5407e-07
435.57	0.00041467	0.0006818	683.36	0.00093028	0.00034438	911.63	0.001813	0.00028637					8.6437	0.0013316	2.1439	2.2234e-07	21.058	9.8061e-07
442.21	0.00035667	0.00079671	693.82	0.00075217	0.00037522	925.54	0.0017917	0.00026791					8.6986	0.0013403	2.1641	2.2928e-07	21.192	1.0079e-06
448.96	0.00029069	0.00085747	704.44	0.00058097	0.00032904	939.65	0.0016954	0.00012079					8.7538	0.0013492	2.1846	2.3643e-07	21.328	1.0359e-06
455.81	0.00034407	0.00069001	715.22	0.00043615	0.00046086	953.99	0.001766	0.00019226					8.8094	0.001358	2.2052	2.4381e-07	21.464	1.0647e-06
462.77	0.00027084	0.00073803	726.17	0.00036714	0.00042287	968.53	0.0015558	0.00015081					8.8653	0.0013669	2.2261	2.5142e-07	21.601	1.0943e-06
469.83	0.00014437	0.00081668	737.28	0.00033643	0.00035248	983.3	0.00159	0.00017103					8.9216	0.0013759	2.2471	2.5926e-07	21.739	1.1247e-06
476.99	0.00030596	0.00082174	748.56	0.00016	0.00049063	998.29	0.0014222	0.00027044					8.9783	0.001385	2.2684	2.6735e-07	21.878	1.1559e-06
484.27	0.00022167	0.00088888	760.01	0.00012833	0.00063877	1013.5	0.001323	0.00017745					9.0353	0.001394	2.2898	2.7568e-07	22.018	1.188e-06
491.65	0.0003272	0.0008479	771.62	7.291e-05	0.00052853	1028.9	0.0012395	0.00014037					9.0927	0.0014032	2.3115	2.8427e-07	22.159	1.2209e-06
499.15	0.00032612	0.00088493	783.42	8.4141e-05	0.0005677	1044.6	0.0013322	0.00031155					9.1505	0.0014124	2.3333	2.9314e-07	22.3	1.2548e-06
506.75	0.00026331	0.00080653	795.4	8.0565e-05	0.00062708	1060.6	0.0010873	0.00031393					9.2086	0.0014216	2.3554	3.0227e-07	22.443	1.2896e-06
514.48	-3.7243e-05	0.00069638	807.55	-0.00015524	0.00061972	1076.7	0.0011023	0.00025943					9.2671	0.0014309	2.3777	3.1169e-07	22.586	1.3253e-06
522.32	-6.6242e-05	0.00071208	819.89	-0.00016409	0.00057415	1093.1	0.00096616	0.0002688					9.3259	0.0014403	2.4001	3.2139e-07	22.731	1.362e-06
530.28	-0.00017099	0.00056952	832.41	-0.000135	0.00058835	1109.8	0.00095411	0.00035476					9.3851	0.0014497	2.4228	3.314e-07	22.876	1.3997e-06
538.35	-9.8662e-05	0.00067495	845.12	-0.00020051	0.00054172	1126.7	0.00093321	0.00030557					9.4447	0.0014592	2.4457	3.4172e-07	23.022	1.4384e-06
546.55	-0.00010715	0.00080204	858.03	-0.00018994	0.00067033	1143.8	0.00087899	0.00022209					9.5047	0.0014687	2.4689	3.5236e-07	23.169	1.4782e-06
554.88	-0.00010161	0.00089357	871.13	-0.00030447	0.00060398	1161.2	0.0010242	0.00017528					9.5651	0.0014783	2.4922	3.6333e-07	23.317	1.5191e-06
563.33	-0.00015145	0.00074645	884.43	-0.00034734	0.00053214	1178.9	0.00096241	0.00013766					9.6258	0.0014879	2.5158	3.7463e-07	23.466	1.5611e-06
571.9	-0.00031059	0.00077336	897.92	-0.00023727	0.00059618	1196.8	0.00073071	0.00028532					9.687	0.0014976	2.5396	3.8628e-07	23.616	1.6042e-06
580.61	-0.00038918	0.00062944	911.63	-0.00053815	0.00047621	1215.1	0.00067456	0.00035065					9.7485	0.0015073	2.5636	3.983e-07	23.767	1.6485e-06
589.45	-0.00031968	0.00061771	925.54	-0.0004494	0.00052806	1233.5	0.00053889	0.00035242					9.8104	0.0015171	2.5878	4.1068e-07	23.919	1.694e-06
598.42	-0.00027956	0.00069649	939.65	-0.00038612	0.00059403	1252.3	0.00069092	0.00038055					9.8727	0.001527	2.6123	4.2345e-07	24.072	1.7408e-06
607.52	-0.00027739	0.00068117	953.99	-0.0004757	0.00056859	1271.3	0.00052918	0.00036079					9.9354	0.0015369	2.637	4.3661e-07	24.226	1.7888e-06
616.77	-0.00029967	0.00074141	968.53	-0.00055609	0.00062268	1290.7	0.00057555	0.00031449					9.9985	0.0015469	2.6619	4.5017e-07	24.381	1.8381e-06
626.15	-0.00027598	0.00053049	983.3	-0.00058307	0.00073316	1310.3	0.00055546	0.00040325					10.062	0.0015569	2.6871	4.6416e-07	24.536	1.8888e-06
635.68	-0.00030037	0.00057196	998.29	-0.00058794	0.00078678	1330.2	0.00046818	0.00044121					10.126	0.001567	2.7125	4.7857e-07	24.693	1.9408e-06
645.34	-0.00029142	0.00063881	1013.5	-0.00072508	0.00078192	1350.5	0.0004336	0.00045075					10.19	0.0015772	2.7381	4.9343e-07	24.851	1.9942e-06
655.16	-0.0003921	0.00067826	1028.9	-0.00069384	0.0007974	1371	0.00044844	0.0004366					10.255	0.0015874	2.764	5.0875e-07	25.01	2.0491e-06
665.12	-0.00043084	0.00059153	1044.6	-0.00073809	0.00052682	1391.8	0.00029756	0.00037343					10.32	0.0015976	2.7901	5.2454e-07	25.17	2.1055e-06
675.23	-0.00020778	0.00071143	1060.6	-0.00064885	0.00076693	1413	0.00039086	0.00042908					10.386	0.001608	2.8165	5.4081e-07	25.331	2.1634e-06
685.5	-0.00046576	0.0005329	1076.7	-0.00071153	0.00079283	1434.5	0.0003876	0.00044283					10.452	0.0016183	2.8432	5.5759e-07	25.493	2.2229e-06
695.92	-0.00035933	0.00072748	1093.1	-0.00078237	0.00078766	1456.3	0.000355	0.00055527					10.518	0.0016288	2.87	5.7488e-07	25.655	2.284e-06
706.5	-0.00048369	0.00064492	1109.8	-0.00099781	0.00072933	1478.4	0.00034461	0.00051543					10.585	0.0016393	2.8972	5.927e-07	25.819	2.3467e-06
717.24	-0.00043089	0.00080286	1126.7	-0.00080558	0.00074549	1500.9	0.00038799	0.00056086					10.652	0.0016498	2.9246	6.1107e-07	25.984	2.4111e-06
728.14	-0.00050399	0.00078759	1143.8	-0.00085965	0.00068656	1523.7	0.00023129	0.00057018					10.72	0.0016605	2.9522	6.3001e-07	26.151	2.4773e-06
739.2	-0.00060007	0.00067386	1161.2	-0.00092005	0.00071686	1546.8	0.0003576	0.00071247					10.788	0.0016712	2.9801	6.4953e-07	26.318	2.5452e-06
750.43	-0.00058354	0.00056515	1178.9	-0.00099122	0.00083764	1570.3	0.00027396	0.00064485					10.856	0.0016819	3.0083	6.6964e-07	26.486	2.615e-06
761.83	-0.00075043	0.00062109	1196.8	-0.00099276	0.00086078	1594.2	0.00025078	0.00050188					10.925	0.0016927	3.0367	6.9037e-07	26.655	2.6867e-06
773.41	-0.00071754	0.00054281	1215.1	-0.00092424	0.00088195	1618.4	0.00032892	0.00048108					10.995	0.0017036	3.0655	7.1174e-07	26.825	2.7602e-06
785.15	-0.00067819	0.00076125	1233.5	-0.00091029	0.00090474	1642.9	0.00023313	0.00063771					11.064	0.0017145	3.0944	7.3377e-07	26.997	2.8358e-06
797.08	-0.00067699	0.00056173	1252.3	-0.00099429	0.00099599	1667.9	0.00021004	0.00053083					11.135	0.0017255	3.1237	7.5647e-07	27.169	2.9134e-06
809.18	-0.00078323	0.00061468	1271.3	-0.0010353	0.00094873	1693.2	0.00013046	0.00053561					11.205	0.0017365	3.1532	7.7987e-07	27.343	2.9931e-06
821.47	-0.0007452	0.00084838	1290.7	-0.0009592	0.00091765	1718.9	0.00015319	0.00068132					11.276	0.0017476	3.183	8.0398e-07	27.518	3.0749e-06
833.94	-0.00084649	0.00064781	1310.3	-0.00089803	0.0010631	1745	0.00015466	0.00066452					11.348	0.0017588	3.2131	8.2883e-07	27.694	3.1589e-06
846.6	-0.00071177	0.00044471	1330.2	-0.00085925	0.0011439	1771.5	0.00013039	0.00049137					11.42	0.0017701	3.2435	8.5444e-07	27.871	3.2452e-06
859.45	-0.00073733	0.00040661	1350.5	-0.00088295	0.0010391	1798.4	0.0001474	0.00050661					11.493	0.0017814	3.2742	8.8084e-07	28.049	3.3338e-06
872.5	-0.0007795	0.00038908	1371	-0.0010321	0.00090018	1825.7	5.976e-05	0.0004683					11.566	0.0017927	3.3051	9.0805e-07	28.228	3.4247e-06
885.74	-0.00072527	0.00058231	1391.8	-0.0012298	0.00090548	1853.4	2.9602e-05	0.00041838					11.639	0.0018041	3.3364	9.3608e-07	28.409	3.5181e-06
899.18	-0.0006293	0.0006032	1413	-0.0010911	0.00095584	1881.5	7.5101e-06	0.00041171					11.713	0.0018156	3.3679	9.6498e-07	28.59	3.614e-06
912.83	-0.00070116	0.00044527	1434.5	-0.0010197	0.00092785	1910	3.1034e-05	0.00033711					11.787	0.0018272	3.3998	9.9475e-07	28.773	3.7125e-06
926.68	-0.00075685	0.00057013	1456.3	-0.0011454	0.00093884	1939	-4.3567e-06	0.00041233					11.862	0.0018388	3.4319	1.0254e-06	28.957	3.8136e-06
940.74	-0.00078118	0.0006478	1478.4	-0.001166	0.00091715	1968.4	0.00012751	0.00044198					11.938	0.0018505	3.4644	1.0571e-06	29.142	3.9174e-06
955.01	-0.00079418	0.00066401	1500.9	-0.0012465	0.00097146	1998.3	5.1736e-05	0.00024859					12.013	0.0018622	3.4971	1.0897e-06	29.328	4.0239e-06
969.5	-0.00080996	0.00059504	1523.7	-0.0013811	0.00095491	2028.6	4.468e-05	0.00035524					12.09	0.001874	3.5302	1.1232e-06	29.515	4.1333e-06
984.21	-0.00069193	0.00061176	1546.8	-0.0014329	0.0010243								12.167	0.0018859	3.5635	1.1578e-06	29.704	4.2456e-06
999.14	-0.00086428	0.00072967	1570.3	-0.0012816	0.00098256								12.244	0.0018978	3.5972	1.1935e-06	29.894	4.361e-06
1014.3	-0.0007213	0.00062469	1594.2	-0.0013207	0.00093879								12.322	0.0019098	3.6313	1.2302e-06	30.085	4.4793e-06
1029.7	-0.00084778	0.00056136	1618.4	-0.0012752	0.0010716								12.4	0.0019219	3.6656	1.2681e-06	30.277	4.6009e-06
1045.3	-0.00083059	0.00069182	1642.9	-0.0013102	0.0010372								12.479	0.0019341	3.7002	1.3071e-06	30.471	4.7256e-06
1061.1	-0.00079892	0.00075745	1667.9	-0.0012745	0.00095202								12.558	0.0019463	3.7352	1.3473e-06	30.665	4.8537e-06
1077.2	-0.00081674	0.00076923	1693.2	-0.001337	0.0011032								12.638	0.0019585	3.7705	1.3888e-06	30.861	4.9852e-06
1093.6	-0.0008613	0.00071625	1718.9	-0.0013076	0.0011457								12.718	0.0019708	3.8062	1.4315e-06	31.059	5.1202e-06
1110.1	-0.00088038	0.00067081	1745	-0.0013909	0.0011265								12.799	0.0019832	3.8422	1.4754e-06	31.257	5.2587e-06
1127	-0.00087173	0.00051807	1771.5	-0.0013663	0.0008811								12.88	0.0019957	3.8785	1.5208e-06	31.457	5.4009e-06
1144.1	-0.00081488	0.00063653	1798.4	-0.0012738	0.0010245								12.962	0.0020082	3.9152	1.5675e-06	31.658	5.5469e-06
1161.4	-0.00082544	0.00050752	1825.7	-0.0013145	0.0011013								13.044	0.0020208	3.9522	1.6156e-06	31.86	5.6968e-06
1179	-0.00083778	0.00049581											13.127	0.0020335	3.9896	1.6652e-06	32.064	5.8506e-06
1196.9	-0.00081735	0.00050778											13.21	0.0020462	4.0273	1.7163e-06	32.269	6.0084e-06
1215	-0.00081055	0.0004823											13.294	0.002059	4.0653	1.7689e-06	32.475	6.1705e-06
1233.4	-0.00080258	0.00052014											13.379	0.0020719	4.1038	1.8231e-06	32.683	6.3368e-06
1252.1	-0.00081709	0.00057073											13.464	0.0020848	4.1426	1.879e-06	32.892	6.5075e-06
1271.1	-0.00087785	0.00047407											13.549	0.0020978	4.1818	1.9365e-06	33.102	6.6827e-06
1290.3	-0.00085669	0.00061945											13.635	0.0021109	4.2213	1.9958e-06	33.313	6.8625e-06
1309.9	-0.0010316	0.00045075											13.722	0.002124	4.2612	2.0569e-06	33.526	7.047e-06
1329.7	-0.00088406	0.00053169											13.809	0.0021373	4.3015	2.1199e-06	33.741	7.2364e-06
1349.9	-0.00088095	0.0005271											13.897	0.0021505	4.3422	2.1847e-06	33.956	7.4308e-06
1370.3	-0.001001	0.00043002											13.985	0.0021639	4.3832	2.2515e-06	34.173	7.6302e-06
1391.1	-0.00087176	0.00045239											14.074	0.0021773	4.4246	2.3203e-06	34.392	7.8349e-06
1412.1	-0.00099375	0.00046248											14.163	0.0021908	4.4665	2.3912e-06	34.611	8.045e-06
1433.5	-0.0010436	0.00050367											14.253	0.0022043	4.5087	2.4642e-06	34.833	8.2605e-06
1455.2	-0.0010162	0.00043849											14.343	0.002218	4.5513	2.5395e-06	35.055	8.4817e-06
1477.3	-0.0010609	0.00048293											14.435	0.0022316	4.5944	2.617e-06	35.279	8.7087e-06
1499.6	-0.00098739	0.00056245											14.526	0.0022454	4.6378	2.6968e-06	35.505	8.9416e-06
1522.3	-0.00096248	0.00033641											14.618	0.0022592	4.6817	2.779e-06	35.732	9.1806e-06
1545.4	-0.0010802	0.0004687											14.711	0.0022731	4.7259	2.8637e-06	35.96	9.4258e-06
1568.8	-0.0010645	0.00057828											14.805	0.0022871	4.7706	2.951e-06	36.19	9.6774e-06
1592.5	-0.0010728	0.00054296											14.899	0.0023012	4.8157	3.0408e-06	36.421	9.9356e-06
1616.7	-0.00096101	0.0005134											14.993	0.0023153	4.8612	3.1334e-06	36.654	1.02e-05
1641.1	-0.0010665	0.00045828											15.089	0.0023295	4.9072	3.2287e-06	36.888	1.0472e-05
1666	-0.0010385	0.00054101											15.184	0.0023437	4.9536	3.3269e-06	37.124	1.0751e-05
1691.2	-0.0010463	0.00059066											15.281	0.002358	5.0004	3.4281e-06	37.361	1.1037e-05
1716.8	-0.0010354	0.00065538											15.378	0.0023724	5.0477	3.5322e-06	37.6	1.1331e-05
1742.8	-0.0011367	0.00059301											15.476	0.0023869	5.0954	3.6395e-06	37.84	1.1632e-05
1769.1	-0.0010173	0.00066028											15.574	0.0024014	5.1436	3.75e-06	38.082	1.1941e-05
1795.9	-0.0012139	0.00072693											15.673	0.0024161	5.1922	3.8638e-06	38.325	1.2257e-05
1823.1	-0.001122	0.00072693											15.772	0.0024307	5.2413	3.981e-06	38.57	1.2582e-05
1850.7	-0.0010535	0.00074871											15.872	0.0024455	5.2909	4.1017e-06	38.817	1.2916e-05
1878.7	-0.0010106	0.0009538											15.973	0.0024603	5.3409	4.226e-06	39.065	1.3258e-05
1907.1	-0.0011623	0.00078027											16.075	0.0024752	5.3914	4.354e-06	39.315	1.3609e-05
1936	-0.0011616	0.0007557											16.177	0.0024902	5.4424	4.4859e-06	39.566	1.3969e-05
1965.3	-0.0010928	0.0009081											16.28	0.0025052	5.4938	4.6216e-06	39.819	1.4338e-05
2000	-0.0011336	0.00076943											16.383	0.0025204	5.5458	4.7614e-06	40.073	1.4716e-05
													16.487	0.0025356	5.5982	4.9054e-06	40.329	1.5105e-05
													16.592	0.0025508	5.6511	5.0536e-06	40.587	1.5503e-05
													16.697	0.0025662	5.7046	5.2063e-06	40.847	1.5912e-05
													16.803	0.0025816	5.7585	5.3634e-06	41.108	1.633e-05
													16.91	0.002597	5.8129	5.5252e-06	41.37	1.676e-05
													17.017	0.0026126	5.8679	5.6919e-06	41.635	1.7201e-05
													17.125	0.0026282	5.9234	5.8635e-06	41.901	1.7653e-05
													17.234	0.0026439	5.9794	6.0401e-06	42.169	1.8116e-05
													17.343	0.0026597	6.0359	6.222e-06	42.438	1.8591e-05
													17.454	0.0026755	6.093	6.4092e-06	42.709	1.9079e-05
													17.564	0.0026915	6.1506	6.602e-06	42.982	1.9578e-05
													17.676	0.0027074	6.2087	6.8005e-06	43.257	2.0091e-05
													17.788	0.0027235	6.2674	7.0049e-06	43.533	2.0616e-05
													17.901	0.0027397	6.3267	7.2152e-06	43.812	2.1155e-05
													18.015	0.0027559	6.3865	7.4318e-06	44.092	2.1707e-05
													18.129	0.0027722	6.4469	7.6547e-06	44.373	2.2274e-05
													18.244	0.0027885	6.5078	7.8842e-06	44.657	2.2854e-05
													18.36	0.0028049	6.5694	8.1205e-06	44.942	2.345e-05
													18.477	0.0028214	6.6315	8.3637e-06	45.23	2.406e-05
													18.594	0.002838	6.6942	8.614e-06	45.519	2.4686e-05
													18.712	0.0028547	6.7575	8.8717e-06	45.81	2.5327e-05
													18.831	0.0028714	6.8214	9.1369e-06	46.102	2.5985e-05
													18.951	0.0028882	6.8859	9.4099e-06	46.397	2.6659e-05
													19.071	0.0029051	6.951	9.6909e-06	46.694	2.735e-05
													19.192	0.002922	7.0167	9.9801e-06	46.992	2.8058e-05
													19.314	0.002939	7.083	1.0278e-05	47.292	2.8784e-05
													19.437	0.0029561	7.15	1.0584e-05	47.595	2.9529e-05
													19.56	0.0029733	7.2176	1.0899e-05	47.899	3.0291e-05
													19.685	0.0029905	7.2858	1.1224e-05	48.205	3.1073e-05
													19.81	0.0030079	7.3547	1.1558e-05	48.513	3.1875e-05
													19.935	0.0030252	7.4242	1.1901e-05	48.823	3.2696e-05
													20.062	0.0030427	7.4944	1.2255e-05	49.135	3.3537e-05
													20.189	0.0030602	7.5653	1.2619e-05	49.449	3.44e-05
													20.318	0.0030778	7.6368	1.2993e-05	49.765	3.5284e-05
													20.447	0.0030955	7.709	1.3379e-05	50.083	3.619e-05
													20.576	0.0031133	7.7819	1.3775e-05	50.403	3.7118e-05
													20.707	0.0031311	7.8555	1.4183e-05	50.725	3.8069e-05
													20.839	0.003149	7.9297	1.4603e-05	51.05	3.9044e-05
													20.971	0.0031669	8.0047	1.5035e-05	51.376	4.0042e-05
													21.104	0.003185	8.0804	1.5479e-05	51.704	4.1065e-05
													21.238	0.0032031	8.1568	1.5936e-05	52.035	4.2114e-05
													21.373	0.0032213	8.2339	1.6407e-05	52.367	4.3188e-05
													21.509	0.0032395	8.3118	1.689e-05	52.702	4.4288e-05
													21.645	0.0032579	8.3904	1.7388e-05	53.039	4.5416e-05
													21.783	0.0032763	8.4697	1.79e-05	53.378	4.657e-05
													21.921	0.0032947	8.5498	1.8427e-05	53.719	4.7753e-05
													22.06	0.0033133	8.6306	1.8969e-05	54.062	4.8965e-05
													22.201	0.0033319	8.7122	1.9526e-05	54.408	5.0207e-05
													22.342	0.0033506	8.7946	2.01e-05	54.755	5.1479e-05
													22.483	0.0033693	8.8777	2.069e-05	55.105	5.2781e-05
													22.626	0.0033882	8.9616	2.1296e-05	55.458	5.4115e-05
													22.77	0.0034071	9.0464	2.192e-05	55.812	5.5482e-05
													22.915	0.003426	9.1319	2.2562e-05	56.169	5.6882e-05
													23.06	0.0034451	9.2182	2.3222e-05	56.528	5.8315e-05
													23.207	0.0034642	9.3054	2.3901e-05	56.889	5.9783e-05
													23.354	0.0034833	9.3934	2.4599e-05	57.253	6.1286e-05
													23.502	0.0035026	9.4822	2.5316e-05	57.618	6.2826e-05
													23.651	0.0035219	9.5718	2.6055e-05	57.987	6.4402e-05
													23.802	0.0035413	9.6623	2.6814e-05	58.357	6.6017e-05
													23.953	0.0035607	9.7537	2.7594e-05	58.73	6.767e-05
													24.105	0.0035803	9.8459	2.8397e-05	59.106	6.9362e-05
													24.258	0.0035998	9.939	2.9222e-05	59.483	7.1095e-05
													24.412	0.0036195	10.033	3.0071e-05	59.863	7.2869e-05
													24.567	0.0036392	10.128	3.0944e-05	60.246	7.4686e-05
													24.723	0.003659	10.224	3.1841e-05	60.631	7.6545e-05
													24.88	0.0036789	10.32	3.2763e-05	61.019	7.8449e-05
													25.038	0.0036988	10.418	3.3711e-05	61.409	8.0398e-05
													25.197	0.0037188	10.516	3.4686e-05	61.801	8.2393e-05
													25.357	0.0037388	10.616	3.5688e-05	62.196	8.4435e-05
													25.518	0.0037589	10.716	3.6718e-05	62.594	8.6525e-05
													25.68	0.0037791	10.817	3.7776e-05	62.994	8.8665e-05
													25.843	0.0037994	10.92	3.8865e-05	63.396	9.0855e-05
													26.008	0.0038197	11.023	3.9984e-05	63.801	9.3096e-05
													26.173	0.00384	11.127	4.1133e-05	64.209	9.539e-05
													26.339	0.0038605	11.232	4.2315e-05	64.619	9.7737e-05
													26.506	0.003881	11.339	4.353e-05	65.032	0.00010014
													26.675	0.0039015	11.446	4.4778e-05	65.448	0.0001026
													26.844	0.0039222	11.554	4.6061e-05	65.866	0.00010511
													27.014	0.0039428	11.663	4.7379e-05	66.287	0.00010769
													27.186	0.0039636	11.773	4.8734e-05	66.711	0.00011032
													27.359	0.0039844	11.885	5.0126e-05	67.137	0.00011301
													27.532	0.0040052	11.997	5.1556e-05	67.566	0.00011577
													27.707	0.0040262	12.111	5.3026e-05	67.998	0.00011859
													27.883	0.0040471	12.225	5.4536e-05	68.433	0.00012148
													28.06	0.0040682	12.341	5.6087e-05	68.87	0.00012443
													28.239	0.0040893	12.457	5.7681e-05	69.31	0.00012745
													28.418	0.0041104	12.575	5.9319e-05	69.753	0.00013054
													28.598	0.0041316	12.694	6.1001e-05	70.199	0.0001337
													28.78	0.0041529	12.814	6.2729e-05	70.648	0.00013693
													28.963	0.0041742	12.935	6.4505e-05	71.099	0.00014023
													29.147	0.0041956	13.057	6.6328e-05	71.554	0.00014361
													29.332	0.004217	13.181	6.8201e-05	72.011	0.00014707
													29.518	0.0042385	13.306	7.0125e-05	72.471	0.0001506
													29.706	0.00426	13.431	7.2101e-05	72.934	0.00015422
													29.894	0.0042816	13.558	7.413e-05	73.4	0.00015791
													30.084	0.0043033	13.687	7.6214e-05	73.87	0.00016169
													30.275	0.0043249	13.816	7.8355e-05	74.342	0.00016556
													30.467	0.0043467	13.947	8.0553e-05	74.817	0.00016951
													30.661	0.0043685	14.078	8.281e-05	75.295	0.00017355
													30.856	0.0043903	14.212	8.5127e-05	75.776	0.00017768
													31.052	0.0044122	14.346	8.7507e-05	76.261	0.0001819
													31.249	0.0044341	14.481	8.995e-05	76.748	0.00018621
													31.447	0.0044561	14.618	9.2458e-05	77.238	0.00019062
													31.647	0.0044781	14.757	9.5033e-05	77.732	0.00019513
													31.848	0.0045002	14.896	9.7677e-05	78.229	0.00019974
													32.05	0.0045223	15.037	0.00010039	78.729	0.00020445
													32.254	0.0045444	15.179	0.00010318	79.232	0.00020926
													32.459	0.0045666	15.323	0.00010604	79.738	0.00021418
													32.665	0.0045888	15.468	0.00010897	80.248	0.00021921
													32.872	0.0046111	15.614	0.00011198	80.761	0.00022435
													33.081	0.0046334	15.761	0.00011508	81.277	0.0002296
													33.291	0.0046558	15.91	0.00011825	81.796	0.00023496
													33.503	0.0046782	16.061	0.00012151	82.319	0.00024044
													33.715	0.0047006	16.213	0.00012485	82.845	0.00024603
													33.929	0.004723	16.366	0.00012828	83.375	0.00025175
													34.145	0.0047455	16.521	0.0001318	83.908	0.00025759
													34.362	0.004768	16.677	0.00013541	84.444	0.00026356
													34.58	0.0047906	16.835	0.00013911	84.984	0.00026965
													34.8	0.0048132	16.994	0.00014291	85.527	0.00027588
													35.021	0.0048358	17.154	0.00014681	86.073	0.00028224
													35.243	0.0048584	17.317	0.00015081	86.623	0.00028873
													35.467	0.0048811	17.48	0.00015491	87.177	0.00029536
													35.692	0.0049038	17.646	0.00015912	87.734	0.00030213
													35.919	0.0049266	17.812	0.00016344	88.295	0.00030905
													36.147	0.0049493	17.981	0.00016786	88.859	0.0003161
													36.376	0.0049721	18.151	0.0001724	89.427	0.00032331
													36.607	0.0049949	18.322	0.00017706	89.999	0.00033067
													36.84	0.0050177	18.496	0.00018184	90.574	0.00033818
													37.074	0.0050405	18.671	0.00018673	91.153	0.00034585
													37.309	0.0050634	18.847	0.00019175	91.735	0.00035368
													37.546	0.0050863	19.025	0.0001969	92.322	0.00036167
													37.785	0.0051092	19.205	0.00020218	92.912	0.00036982
													38.025	0.0051321	19.387	0.00020759	93.505	0.00037815
													38.266	0.005155	19.57	0.00021314	94.103	0.00038664
													38.509	0.0051779	19.755	0.00021883	94.704	0.00039531
													38.754	0.0052009	19.942	0.00022466	95.31	0.00040415
													39	0.0052238	20.13	0.00023063	95.919	0.00041318
													39.248	0.0052468	20.321	0.00023676	96.532	0.00042238
													39.497	0.0052697	20.513	0.00024303	97.149	0.00043178
													39.748	0.0052927	20.707	0.00024947	97.77	0.00044136
													40	0.0053157	20.902	0.00025606	98.395	0.00045114
													40.254	0.0053387	21.1	0.00026281	99.023	0.00046111
													40.51	0.0053616	21.3	0.00026973	99.656	0.00047128
													40.767	0.0053846	21.501	0.00027683	100.29	0.00048165
													41.026	0.0054076	21.704	0.00028409	100.93	0.00049223
													41.287	0.0054306	21.909	0.00029154	101.58	0.00050302
													41.549	0.0054536	22.117	0.00029916	102.23	0.00051402
													41.813	0.0054765	22.326	0.00030697	102.88	0.00052524
													42.078	0.0054995	22.537	0.00031498	103.54	0.00053668
													42.345	0.0055224	22.75	0.00032317	104.2	0.00054834
													42.614	0.0055454	22.965	0.00033156	104.87	0.00056023
													42.885	0.0055683	23.182	0.00034016	105.54	0.00057235
													43.157	0.0055912	23.401	0.00034896	106.21	0.0005847
													43.431	0.0056141	23.623	0.00035797	106.89	0.00059729
													43.707	0.005637	23.846	0.0003672	107.57	0.00061012
													43.985	0.0056598	24.071	0.00037665	108.26	0.0006232
													44.264	0.0056827	24.299	0.00038633	108.95	0.00063653
													44.545	0.0057055	24.529	0.00039623	109.65	0.00065011
													44.828	0.0057283	24.761	0.00040637	110.35	0.00066394
													45.113	0.005751	24.995	0.00041675	111.06	0.00067804
													45.399	0.0057737	25.231	0.00042737	111.77	0.0006924
													45.688	0.0057965	25.47	0.00043824	112.48	0.00070703
													45.978	0.0058191	25.71	0.00044937	113.2	0.00072193
													46.27	0.0058418	25.953	0.00046075	113.92	0.0007371
													46.564	0.0058644	26.199	0.0004724	114.65	0.00075256
													46.86	0.0058869	26.446	0.00048432	115.38	0.0007683
													47.157	0.0059095	26.697	0.00049652	116.12	0.00078433
													47.457	0.0059319	26.949	0.000509	116.86	0.00080066
													47.758	0.0059544	27.204	0.00052176	117.61	0.00081728
													48.061	0.0059768	27.461	0.00053482	118.36	0.00083419
													48.367	0.0059991	27.721	0.00054817	119.12	0.00085142
													48.674	0.0060214	27.983	0.00056183	119.88	0.00086895
													48.983	0.0060437	28.247	0.0005758	120.64	0.00088679
													49.294	0.0060659	28.514	0.00059009	121.42	0.00090496
													49.607	0.006088	28.784	0.0006047	122.19	0.00092344
													49.922	0.0061101	29.056	0.00061963	122.97	0.00094225
													50.239	0.0061321	29.331	0.0006349	123.76	0.00096139
													50.558	0.0061541	29.608	0.00065052	124.55	0.00098086
													50.879	0.006176	29.888	0.00066647	125.35	0.0010007
													51.202	0.0061978	30.171	0.00068279	126.15	0.0010208
													51.528	0.0062196	30.456	0.00069946	126.95	0.0010413
													51.855	0.0062413	30.744	0.00071651	127.76	0.0010622
													52.184	0.0062629	31.034	0.00073392	128.58	0.0010834
													52.516	0.0062844	31.328	0.00075172	129.4	0.0011049
													52.849	0.0063059	31.624	0.0007699	130.23	0.0011269
													53.185	0.0063273	31.923	0.00078849	131.06	0.0011491
													53.522	0.0063486	32.225	0.00080747	131.9	0.0011718
													53.862	0.0063698	32.529	0.00082686	132.74	0.0011949
													54.204	0.0063909	32.837	0.00084667	133.59	0.0012183
													54.549	0.006412	33.147	0.0008669	134.44	0.0012421
													54.895	0.0064329	33.461	0.00088757	135.3	0.0012663
													55.244	0.0064538	33.777	0.00090867	136.17	0.0012908
													55.595	0.0064746	34.097	0.00093022	137.04	0.0013158
													55.948	0.0064952	34.419	0.00095223	137.91	0.0013412
													56.303	0.0065158	34.744	0.00097469	138.8	0.001367
													56.661	0.0065363	35.073	0.00099763	139.68	0.0013932
													57.02	0.0065566	35.404	0.001021	140.58	0.0014198
													57.383	0.0065769	35.739	0.0010449	141.47	0.0014468
													57.747	0.006597	36.077	0.0010693	142.38	0.0014742
													58.114	0.0066171	36.418	0.0010942	143.29	0.0015021
													58.483	0.006637	36.762	0.0011196	144.2	0.0015304
													58.854	0.0066568	37.11	0.0011456	145.13	0.0015591
													59.228	0.0066764	37.461	0.001172	146.05	0.0015883
													59.604	0.006696	37.815	0.001199	146.99	0.0016179
													59.983	0.0067154	38.173	0.0012265	147.93	0.0016479
													60.364	0.0067347	38.534	0.0012546	148.87	0.0016784
													60.747	0.0067539	38.898	0.0012832	149.82	0.0017093
													61.133	0.0067729	39.266	0.0013124	150.78	0.0017407
													61.521	0.0067918	39.637	0.0013422	151.74	0.0017725
													61.912	0.0068106	40.012	0.0013726	152.71	0.0018048
													62.305	0.0068292	40.39	0.0014036	153.69	0.0018376
													62.701	0.0068476	40.772	0.0014351	154.67	0.0018708
													63.099	0.0068659	41.157	0.0014673	155.66	0.0019045
													63.5	0.0068841	41.546	0.0015001	156.66	0.0019386
													63.903	0.0069021	41.939	0.0015335	157.66	0.0019733
													64.309	0.00692	42.336	0.0015676	158.66	0.0020084
													64.717	0.0069377	42.736	0.0016023	159.68	0.002044
													65.128	0.0069552	43.14	0.0016377	160.7	0.00208
													65.542	0.0069726	43.548	0.0016737	161.73	0.0021166
													65.958	0.0069898	43.96	0.0017104	162.76	0.0021536
													66.377	0.0070069	44.375	0.0017478	163.8	0.0021911
													66.798	0.0070237	44.795	0.0017859	164.85	0.0022291
													67.223	0.0070404	45.218	0.0018247	165.9	0.0022676
													67.65	0.0070569	45.646	0.0018642	166.96	0.0023066
													68.079	0.0070733	46.077	0.0019044	168.03	0.0023461
													68.512	0.0070894	46.513	0.0019453	169.1	0.0023861
													68.947	0.0071054	46.953	0.001987	170.18	0.0024265
													69.385	0.0071211	47.397	0.0020294	171.27	0.0024675
													69.825	0.0071367	47.845	0.0020726	172.36	0.002509
													70.269	0.0071521	48.297	0.0021165	173.47	0.0025509
													70.715	0.0071673	48.754	0.0021613	174.57	0.0025934
													71.164	0.0071823	49.215	0.0022067	175.69	0.0026364
													71.616	0.007197	49.68	0.002253	176.81	0.0026798
													72.071	0.0072116	50.15	0.0023001	177.94	0.0027238
													72.529	0.007226	50.624	0.002348	179.08	0.0027682
													72.989	0.0072401	51.103	0.0023967	180.23	0.0028132
													73.453	0.0072541	51.586	0.0024462	181.38	0.0028586
													73.919	0.0072678	52.073	0.0024965	182.54	0.0029046
													74.389	0.0072813	52.566	0.0025477	183.7	0.002951
													74.861	0.0072945	53.063	0.0025998	184.88	0.002998
													75.337	0.0073076	53.564	0.0026526	186.06	0.0030454
													75.815	0.0073204	54.071	0.0027064	187.25	0.0030933
													76.297	0.0073329	54.582	0.002761	188.44	0.0031417
													76.781	0.0073453	55.098	0.0028165	189.65	0.0031906
													77.269	0.0073574	55.619	0.0028729	190.86	0.00324
													77.759	0.0073692	56.145	0.0029302	192.08	0.0032898
													78.253	0.0073808	56.676	0.0029883	193.31	0.0033402
													78.75	0.0073922	57.212	0.0030474	194.54	0.003391
													79.25	0.0074033	57.752	0.0031074	195.79	0.0034423
													79.754	0.0074141	58.298	0.0031683	197.04	0.003494
													80.26	0.0074247	58.85	0.0032301	198.3	0.0035462
													80.77	0.007435	59.406	0.0032929	199.56	0.0035989
													81.283	0.0074451	59.968	0.0033566	200.84	0.003652
													81.799	0.0074549	60.535	0.0034213	202.12	0.0037056
													82.319	0.0074644	61.107	0.0034868	203.42	0.0037596
													82.841	0.0074737	61.685	0.0035534	204.72	0.003814
													83.368	0.0074827	62.268	0.0036209	206.02	0.0038689
													83.897	0.0074914	62.857	0.0036894	207.34	0.0039242
													84.43	0.0074998	63.451	0.0037588	208.67	0.0039799
													84.966	0.0075079	64.051	0.0038292	210	0.0040361
													85.506	0.0075158	64.656	0.0039006	211.34	0.0040926
													86.049	0.0075233	65.268	0.0039729	212.69	0.0041495
													86.595	0.0075306	65.885	0.0040463	214.05	0.0042069
													87.145	0.0075376	66.508	0.0041206	215.42	0.0042646
													87.699	0.0075442	67.137	0.0041959	216.8	0.0043226
													88.256	0.0075506	67.771	0.0042722	218.18	0.0043811
													88.816	0.0075567	68.412	0.0043495	219.58	0.0044399
													89.38	0.0075624	69.059	0.0044277	220.98	0.004499
													89.948	0.0075679	69.712	0.004507	222.39	0.0045585
													90.519	0.007573	70.371	0.0045873	223.81	0.0046183
													91.094	0.0075778	71.036	0.0046685	225.24	0.0046784
													91.672	0.0075823	71.708	0.0047507	226.68	0.0047388
													92.255	0.0075865	72.386	0.004834	228.13	0.0047995
													92.841	0.0075904	73.07	0.0049182	229.59	0.0048604
													93.43	0.0075939	73.761	0.0050034	231.06	0.0049217
													94.023	0.0075971	74.458	0.0050896	232.53	0.0049832
													94.621	0.0076	75.162	0.0051768	234.02	0.0050449
													95.222	0.0076025	75.873	0.0052649	235.52	0.0051069
													95.826	0.0076047	76.59	0.005354	237.02	0.005169
													96.435	0.0076065	77.314	0.0054441	238.54	0.0052314
													97.047	0.007608	78.045	0.0055352	240.06	0.005294
													97.664	0.0076092	78.783	0.0056272	241.59	0.0053567
													98.284	0.00761	79.528	0.0057202	243.14	0.0054196
													98.908	0.0076105	80.28	0.0058141	244.69	0.0054826
													99.536	0.0076106	81.039	0.0059089	246.26	0.0055457
													100.17	0.0076104	81.805	0.0060047	247.83	0.005609
													100.8	0.0076098	82.579	0.0061014	249.41	0.0056723
													101.44	0.0076088	83.36	0.006199	251.01	0.0057357
													102.09	0.0076075	84.148	0.0062975	252.61	0.0057992
													102.74	0.0076059	84.943	0.0063969	254.23	0.0058627
													103.39	0.0076038	85.746	0.0064972	255.85	0.0059262
													104.05	0.0076014	86.557	0.0065984	257.49	0.0059897
													104.71	0.0075986	87.375	0.0067004	259.13	0.0060532
													105.37	0.0075955	88.201	0.0068032	260.79	0.0061167
													106.04	0.0075919	89.035	0.0069069	262.46	0.0061801
													106.71	0.007588	89.877	0.0070113	264.13	0.0062434
													107.39	0.0075837	90.727	0.0071166	265.82	0.0063066
													108.07	0.0075791	91.585	0.0072226	267.52	0.0063697
													108.76	0.007574	92.451	0.0073294	269.23	0.0064327
													109.45	0.0075686	93.325	0.007437	270.95	0.0064955
													110.15	0.0075628	94.207	0.0075453	272.68	0.0065581
													110.85	0.0075566	95.098	0.0076542	274.42	0.0066205
													111.55	0.00755	95.997	0.0077639	276.18	0.0066827
													112.26	0.007543	96.904	0.0078742	277.94	0.0067446
													112.97	0.0075356	97.821	0.0079851	279.72	0.0068062
													113.69	0.0075278	98.745	0.0080967	281.51	0.0068676
													114.41	0.0075196	99.679	0.0082088	283.31	0.0069286
													115.14	0.0075111	100.62	0.0083215	285.12	0.0069893
													115.87	0.0075021	101.57	0.0084347	286.94	0.0070496
													116.61	0.0074927	102.53	0.0085485	288.77	0.0071096
													117.35	0.007483	103.5	0.0086627	290.62	0.0071691
													118.09	0.0074728	104.48	0.0087774	292.48	0.0072281
													118.84	0.0074622	105.47	0.0088925	294.35	0.0072867
													119.6	0.0074512	106.47	0.0090079	296.23	0.0073448
													120.36	0.0074398	107.47	0.0091238	298.12	0.0074024
													121.12	0.007428	108.49	0.00924	300.03	0.0074595
													121.89	0.0074158	109.51	0.0093564	301.94	0.007516
													122.66	0.0074032	110.55	0.0094731	303.87	0.0075719
													123.44	0.0073901	111.6	0.0095901	305.81	0.0076271
													124.23	0.0073767	112.65	0.0097072	307.77	0.0076817
													125.01	0.0073628	113.72	0.0098244	309.74	0.0077357
													125.81	0.0073486	114.79	0.0099418	311.72	0.0077889
													126.61	0.0073339	115.88	0.010059	313.71	0.0078415
													127.41	0.0073188	116.97	0.010177	315.71	0.0078932
													128.22	0.0073033	118.08	0.010294	317.73	0.0079442
													129.04	0.0072874	119.19	0.010412	319.76	0.0079944
													129.85	0.007271	120.32	0.010529	321.8	0.0080438
													130.68	0.0072543	121.46	0.010646	323.86	0.0080923
													131.51	0.0072371	122.61	0.010763	325.93	0.0081399
													132.34	0.0072195	123.77	0.01088	328.01	0.0081866
													133.19	0.0072015	124.94	0.010996	330.11	0.0082324
													134.03	0.0071831	126.12	0.011112	332.22	0.0082772
													134.88	0.0071642	127.31	0.011228	334.34	0.0083211
													135.74	0.007145	128.51	0.011343	336.48	0.0083639
													136.6	0.0071253	129.73	0.011458	338.63	0.0084057
													137.47	0.0071052	130.95	0.011572	340.8	0.0084464
													138.34	0.0070847	132.19	0.011686	342.97	0.008486
													139.22	0.0070638	133.44	0.011799	345.17	0.0085245
													140.1	0.0070425	134.7	0.011912	347.37	0.0085619
													140.99	0.0070208	135.98	0.012023	349.59	0.0085982
													141.89	0.0069986	137.26	0.012134	351.83	0.0086332
													142.79	0.006976	138.56	0.012244	354.07	0.008667
													143.7	0.0069531	139.87	0.012353	356.34	0.0086996
													144.61	0.0069297	141.19	0.012461	358.61	0.0087309
													145.53	0.0069059	142.53	0.012568	360.91	0.008761
													146.45	0.0068817	143.88	0.012674	363.21	0.0087898
													147.38	0.0068571	145.24	0.012779	365.53	0.0088172
													148.32	0.0068321	146.61	0.012883	367.87	0.0088433
													149.26	0.0068067	148	0.012985	370.22	0.008868
													150.21	0.0067809	149.39	0.013086	372.59	0.0088914
													151.16	0.0067547	150.81	0.013186	374.97	0.0089133
													152.12	0.006728	152.23	0.013284	377.37	0.0089338
													153.09	0.006701	153.67	0.013381	379.78	0.0089529
													154.06	0.0066736	155.13	0.013476	382.2	0.0089705
													155.04	0.0066458	156.59	0.01357	384.65	0.0089866
													156.02	0.0066176	158.07	0.013662	387.11	0.0090012
													157.01	0.0065891	159.57	0.013752	389.58	0.0090143
													158.01	0.0065601	161.08	0.01384	392.07	0.0090259
													159.02	0.0065308	162.6	0.013926	394.57	0.009036
													160.03	0.006501	164.14	0.014011	397.1	0.0090445
													161.04	0.0064709	165.69	0.014093	399.63	0.0090514
													162.06	0.0064404	167.25	0.014174	402.19	0.0090567
													163.09	0.0064096	168.84	0.014252	404.76	0.0090605
													164.13	0.0063783	170.43	0.014328	407.35	0.0090626
													165.17	0.0063467	172.04	0.014402	409.95	0.0090631
													166.22	0.0063147	173.67	0.014473	412.57	0.009062
													167.28	0.0062824	175.31	0.014542	415.21	0.0090593
													168.34	0.0062497	176.97	0.014609	417.86	0.0090549
													169.41	0.0062167	178.64	0.014673	420.53	0.0090489
													170.48	0.0061833	180.33	0.014734	423.22	0.0090412
													171.57	0.0061495	182.04	0.014793	425.92	0.0090319
													172.66	0.0061154	183.76	0.01485	428.64	0.0090209
													173.75	0.006081	185.49	0.014903	431.38	0.0090082
													174.86	0.0060462	187.25	0.014954	434.14	0.0089939
													175.97	0.0060111	189.02	0.015002	436.92	0.0089778
													177.08	0.0059756	190.81	0.015047	439.71	0.0089602
													178.21	0.0059398	192.61	0.015089	442.52	0.0089408
													179.34	0.0059037	194.43	0.015128	445.35	0.0089198
													180.48	0.0058673	196.27	0.015164	448.19	0.0088971
													181.63	0.0058305	198.12	0.015196	451.06	0.0088728
													182.78	0.0057935	200	0.015226	453.94	0.0088468
													183.94	0.0057561	201.89	0.015252	456.84	0.0088192
													185.11	0.0057185	203.8	0.015276	459.76	0.0087899
													186.28	0.0056805	205.72	0.015295	462.7	0.008759
													187.47	0.0056422	207.67	0.015312	465.66	0.0087264
													188.66	0.0056037	209.63	0.015325	468.63	0.0086923
													189.86	0.0055648	211.62	0.015335	471.63	0.0086565
													191.06	0.0055257	213.62	0.015341	474.64	0.0086191
													192.28	0.0054864	215.64	0.015344	477.68	0.0085802
													193.5	0.0054467	217.67	0.015343	480.73	0.0085397
													194.73	0.0054068	219.73	0.015339	483.8	0.0084977
													195.96	0.0053666	221.81	0.015331	486.89	0.0084541
													197.21	0.0053262	223.91	0.015319	490	0.008409
													198.46	0.0052855	226.02	0.015304	493.14	0.0083624
													199.72	0.0052445	228.16	0.015285	496.29	0.0083144
													200.99	0.0052034	230.32	0.015263	499.46	0.0082648
													202.26	0.005162	232.5	0.015236	502.65	0.0082139
													203.55	0.0051203	234.69	0.015206	505.86	0.0081615
													204.84	0.0050785	236.91	0.015173	509.1	0.0081078
													206.14	0.0050364	239.15	0.015135	512.35	0.0080526
													207.45	0.0049942	241.41	0.015094	515.63	0.0079962
													208.77	0.0049517	243.7	0.015049	518.92	0.0079384
													210.09	0.004909	246	0.015	522.24	0.0078794
													211.43	0.0048661	248.33	0.014947	525.57	0.007819
													212.77	0.0048231	250.67	0.014891	528.93	0.0077575
													214.12	0.0047798	253.04	0.014831	532.31	0.0076947
													215.48	0.0047364	255.44	0.014767	535.72	0.0076308
													216.85	0.0046929	257.85	0.0147	539.14	0.0075658
													218.23	0.0046491	260.29	0.014628	542.59	0.0074996
													219.61	0.0046052	262.75	0.014553	546.05	0.0074324
													221.01	0.0045612	265.23	0.014475	549.54	0.0073641
													222.41	0.004517	267.74	0.014392	553.06	0.0072949
													223.83	0.0044727	270.27	0.014306	556.59	0.0072246
													225.25	0.0044283	272.83	0.014217	560.15	0.0071534
													226.68	0.0043837	275.41	0.014124	563.73	0.0070814
													228.12	0.004339	278.01	0.014027	567.33	0.0070084
													229.57	0.0042942	280.64	0.013927	570.96	0.0069347
													231.02	0.0042493	283.29	0.013823	574.6	0.0068601
													232.49	0.0042043	285.97	0.013716	578.28	0.0067848
													233.97	0.0041593	288.68	0.013606	581.97	0.0067088
													235.45	0.0041141	291.41	0.013492	585.69	0.0066321
													236.95	0.0040689	294.16	0.013375	589.44	0.0065548
													238.45	0.0040236	296.94	0.013255	593.2	0.0064769
													239.97	0.0039782	299.75	0.013132	596.99	0.0063984
													241.49	0.0039328	302.58	0.013005	600.81	0.0063195
													243.03	0.0038873	305.44	0.012876	604.65	0.00624
													244.57	0.0038418	308.33	0.012744	608.51	0.0061602
													246.12	0.0037963	311.25	0.012609	612.4	0.0060799
													247.69	0.0037507	314.19	0.012471	616.32	0.0059993
													249.26	0.0037051	317.16	0.01233	620.26	0.0059184
													250.84	0.0036595	320.16	0.012187	624.22	0.0058372
													252.43	0.0036139	323.19	0.012041	628.21	0.0057557
													254.04	0.0035684	326.24	0.011893	632.22	0.0056741
													255.65	0.0035228	329.33	0.011742	636.26	0.0055924
													257.27	0.0034772	332.44	0.011589	640.33	0.0055105
													258.91	0.0034316	335.58	0.011434	644.42	0.0054286
													260.55	0.0033861	338.76	0.011277	648.54	0.0053467
													262.21	0.0033407	341.96	0.011117	652.69	0.0052647
													263.87	0.0032952	345.19	0.010956	656.86	0.0051828
													265.55	0.0032498	348.45	0.010793	661.06	0.005101
													267.24	0.0032045	351.75	0.010629	665.28	0.0050194
													268.93	0.0031592	355.07	0.010462	669.53	0.0049379
													270.64	0.0031141	358.43	0.010295	673.81	0.0048566
													272.36	0.003069	361.82	0.010125	678.12	0.0047756
													274.09	0.0030239	365.24	0.0099549	682.45	0.0046948
													275.83	0.002979	368.69	0.0097833	686.81	0.0046144
													277.58	0.0029342	372.18	0.0096106	691.2	0.0045343
													279.34	0.0028895	375.7	0.0094369	695.62	0.0044546
													281.12	0.0028448	379.25	0.0092624	700.07	0.0043754
													282.9	0.0028004	382.84	0.0090871	704.54	0.0042966
													284.7	0.002756	386.46	0.0089112	709.04	0.0042182
													286.51	0.0027118	390.11	0.0087348	713.58	0.0041405
													288.33	0.0026677	393.8	0.008558	718.14	0.0040632
													290.16	0.0026238	397.52	0.008381	722.73	0.0039866
													292	0.00258	401.28	0.0082037	727.34	0.0039105
													293.86	0.0025363	405.07	0.0080263	731.99	0.0038351
													295.72	0.0024929	408.9	0.007849	736.67	0.0037604
													297.6	0.0024496	412.77	0.0076719	741.38	0.0036864
													299.49	0.0024065	416.67	0.007495	746.12	0.0036131
													301.39	0.0023636	420.61	0.0073185	750.89	0.0035405
													303.31	0.0023208	424.59	0.0071424	755.69	0.0034688
													305.23	0.0022783	428.6	0.006967	760.52	0.0033978
													307.17	0.002236	432.66	0.0067922	765.38	0.0033277
													309.12	0.0021939	436.75	0.0066182	770.27	0.0032584
													311.09	0.002152	440.88	0.0064451	775.19	0.0031899
													313.06	0.0021103	445.04	0.006273	780.14	0.0031224
													315.05	0.0020688	449.25	0.006102	785.13	0.0030557
													317.05	0.0020276	453.5	0.0059322	790.15	0.00299
													319.06	0.0019866	457.79	0.0057637	795.2	0.0029252
													321.09	0.0019459	462.11	0.0055965	800.28	0.0028614
													323.13	0.0019054	466.48	0.0054309	805.39	0.0027985
													325.18	0.0018652	470.89	0.0052667	810.54	0.0027366
													327.25	0.0018252	475.35	0.0051042	815.72	0.0026757
													329.33	0.0017855	479.84	0.0049434	820.94	0.0026158
													331.42	0.001746	484.38	0.0047844	826.18	0.0025569
													333.52	0.0017068	488.96	0.0046273	831.46	0.002499
													335.64	0.001668	493.58	0.0044722	836.78	0.0024422
													337.77	0.0016293	498.25	0.004319	842.12	0.0023864
													339.92	0.001591	502.96	0.0041679	847.51	0.0023316
													342.08	0.001553	507.71	0.004019	852.92	0.0022779
													344.25	0.0015153	512.51	0.0038723	858.37	0.0022253
													346.43	0.0014778	517.36	0.0037278	863.86	0.0021737
													348.63	0.0014407	522.25	0.0035857	869.38	0.0021232
													350.85	0.0014039	527.19	0.0034459	874.94	0.0020737
													353.08	0.0013674	532.17	0.0033086	880.53	0.0020253
													355.32	0.0013312	537.2	0.0031737	886.16	0.0019779
													357.58	0.0012954	542.28	0.0030413	891.82	0.0019316
													359.85	0.0012598	547.41	0.0029115	897.52	0.0018864
													362.13	0.0012246	552.58	0.0027842	903.26	0.0018422
													364.43	0.0011897	557.81	0.0026595	909.03	0.0017991
													366.75	0.0011552	563.08	0.0025374	914.84	0.001757
													369.08	0.001121	568.41	0.002418	920.69	0.0017159
													371.42	0.0010871	573.78	0.0023013	926.57	0.0016759
													373.78	0.0010536	579.21	0.0021872	932.49	0.0016369
													376.15	0.0010204	584.68	0.0020758	938.45	0.0015989
													378.54	0.00098756	590.21	0.0019672	944.45	0.0015619
													380.95	0.00095508	595.79	0.0018612	950.48	0.0015259
													383.36	0.00092295	601.42	0.001758	956.56	0.0014909
													385.8	0.00089117	607.11	0.0016574	962.67	0.0014569
													388.25	0.00085975	612.85	0.0015596	968.83	0.0014238
													390.72	0.0008287	618.64	0.0014644	975.02	0.0013917
													393.2	0.000798	624.49	0.0013719	981.25	0.0013606
													395.69	0.00076766	630.4	0.0012821	987.52	0.0013304
													398.21	0.00073769	636.36	0.001195	993.83	0.001301
													400.74	0.00070808	642.37	0.0011105	1000.2	0.0012726
													403.28	0.00067884	648.45	0.0010286	1006.6	0.0012451
													405.84	0.00064997	654.58	0.00094931	1013	0.0012185
													408.42	0.00062146	660.77	0.00087257	1019.5	0.0011927
													411.01	0.00059333	667.01	0.00079836	1026	0.0011677
													413.62	0.00056556	673.32	0.00072665	1032.6	0.0011436
													416.25	0.00053816	679.68	0.00065741	1039.2	0.0011203
													418.89	0.00051114	686.11	0.0005906	1045.8	0.0010978
													421.55	0.00048449	692.6	0.00052619	1052.5	0.0010761
													424.23	0.00045821	699.15	0.00046413	1059.2	0.0010552
													426.93	0.0004323	705.76	0.00040438	1066	0.001035
													429.64	0.00040676	712.43	0.0003469	1072.8	0.0010155
													432.37	0.00038159	719.16	0.00029165	1079.6	0.00099676
													435.11	0.0003568	725.96	0.00023859	1086.5	0.00097871
													437.87	0.00033238	732.83	0.00018765	1093.5	0.00096133
													440.66	0.00030832	739.76	0.00013881	1100.5	0.00094463
													443.45	0.00028464	746.75	9.1997e-05	1107.5	0.00092857
													446.27	0.00026133	753.81	4.7173e-05	1114.6	0.00091315
													449.1	0.00023838	760.94	4.2908e-06	1121.7	0.00089834
													451.96	0.0002158	768.13	-3.6707e-05	1128.9	0.00088413
													454.83	0.00019359	775.39	-7.5869e-05	1136.1	0.00087049
													457.72	0.00017173	782.73	-0.00011324	1143.4	0.00085743
													460.62	0.00015025	790.13	-0.00014889	1150.7	0.00084491
													463.55	0.00012912	797.6	-0.00018285	1158	0.00083293
													466.49	0.00010836	805.14	-0.00021519	1165.4	0.00082146
													469.45	8.7959e-05	812.75	-0.00024595	1172.9	0.00081049
													472.44	6.791e-05	820.43	-0.00027519	1180.4	0.00080001
													475.44	4.822e-05	828.19	-0.00030295	1187.9	0.00078999
													478.46	2.8878e-05	836.02	-0.0003293	1195.5	0.00078042
													481.49	9.888e-06	843.92	-0.00035427	1203.1	0.0007713
													484.55	-8.755e-06	851.9	-0.00037793	1210.8	0.0007626
													487.63	-2.7047e-05	859.96	-0.00040031	1218.6	0.0007543
													490.73	-4.4995e-05	868.09	-0.00042147	1226.4	0.0007464
													493.84	-6.2601e-05	876.3	-0.00044147	1234.2	0.00073888
													496.98	-7.9869e-05	884.58	-0.00046034	1242.1	0.00073172
													500.14	-9.6802e-05	892.94	-0.00047813	1250	0.00072491
													503.31	-0.0001134	901.39	-0.00049489	1258	0.00071845
													506.51	-0.00012967	909.91	-0.00051067	1266	0.0007123
													509.73	-0.0001456	918.51	-0.0005255	1274.1	0.00070647
													512.96	-0.00016121	927.2	-0.00053944	1282.3	0.00070094
													516.22	-0.00017651	935.96	-0.00055252	1290.5	0.0006957
													519.5	-0.00019148	944.81	-0.00056478	1298.7	0.00069073
													522.8	-0.00020613	953.74	-0.00057626	1307	0.00068603
													526.12	-0.00022047	962.76	-0.00058702	1315.4	0.00068158
													529.46	-0.0002345	971.86	-0.00059706	1323.8	0.00067737
													532.82	-0.00024823	981.05	-0.00060645	1332.2	0.00067339
													536.21	-0.00026165	990.33	-0.0006152	1340.8	0.00066963
													539.61	-0.00027477	999.69	-0.00062336	1349.3	0.00066608
													543.04	-0.0002876	1009.1	-0.00063096	1358	0.00066274
													546.49	-0.00030013	1018.7	-0.00063803	1366.6	0.00065959
													549.96	-0.00031238	1028.3	-0.0006446	1375.4	0.00065662
													553.45	-0.00032433	1038	-0.00065069	1384.2	0.00065382
													556.97	-0.00033601	1047.9	-0.00065634	1393	0.00065119
													560.5	-0.00034741	1057.8	-0.00066158	1401.9	0.00064871
													564.06	-0.00035854	1067.8	-0.00066642	1410.9	0.00064639
													567.65	-0.00036939	1077.9	-0.0006709	1419.9	0.0006442
													571.25	-0.00037998	1088	-0.00067503	1429	0.00064216
													574.88	-0.0003903	1098.3	-0.00067884	1438.1	0.00064024
													578.53	-0.00040037	1108.7	-0.00068236	1447.3	0.00063844
													582.2	-0.00041018	1119.2	-0.00068559	1456.5	0.00063675
													585.9	-0.00041974	1129.8	-0.00068856	1465.8	0.00063517
													589.62	-0.00042905	1140.5	-0.00069128	1475.2	0.0006337
													593.37	-0.00043812	1151.2	-0.00069378	1484.6	0.00063232
													597.14	-0.00044696	1162.1	-0.00069607	1494.1	0.00063103
													600.93	-0.00045555	1173.1	-0.00069816	1503.7	0.00062983
													604.74	-0.00046391	1184.2	-0.00070008	1513.3	0.00062871
													608.58	-0.00047205	1195.4	-0.00070182	1523	0.00062766
													612.45	-0.00047996	1206.7	-0.00070342	1532.7	0.00062669
													616.34	-0.00048765	1218.1	-0.00070487	1542.5	0.00062579
													620.25	-0.00049513	1229.6	-0.00070619	1552.3	0.00062494
													624.19	-0.0005024	1241.3	-0.00070738	1562.3	0.00062416
													628.16	-0.00050946	1253	-0.00070847	1572.2	0.00062344
													632.15	-0.00051631	1264.8	-0.00070946	1582.3	0.00062276
													636.16	-0.00052297	1276.8	-0.00071034	1592.4	0.00062214
													640.2	-0.00052943	1288.9	-0.00071115	1602.6	0.00062156
													644.27	-0.0005357	1301.1	-0.00071188	1612.8	0.00062102
													648.36	-0.00054178	1313.4	-0.00071253	1623.1	0.00062053
													652.48	-0.00054768	1325.8	-0.00071312	1633.5	0.00062007
													656.62	-0.00055339	1338.3	-0.00071365	1643.9	0.00061964
													660.79	-0.00055893	1351	-0.00071412	1654.5	0.00061926
													664.99	-0.0005643	1363.7	-0.00071454	1665	0.00061889
													669.21	-0.0005695	1376.6	-0.00071493	1675.7	0.00061856
													673.46	-0.00057454	1389.6	-0.00071527	1686.4	0.00061825
													677.74	-0.00057941	1402.8	-0.00071557	1697.2	0.00061797
													682.04	-0.00058412	1416	-0.00071585	1708	0.00061772
													686.37	-0.00058868	1429.4	-0.00071609	1718.9	0.00061748
													690.73	-0.0005931	1442.9	-0.0007163	1729.9	0.00061726
													695.12	-0.00059736	1456.6	-0.0007165	1741	0.00061706
													699.53	-0.00060148	1470.4	-0.00071666	1752.1	0.00061688
													703.98	-0.00060547	1484.3	-0.00071682	1763.3	0.00061671
													708.45	-0.00060931	1498.3	-0.00071695	1774.6	0.00061655
													712.95	-0.00061303	1512.5	-0.00071706	1785.9	0.00061641
													717.47	-0.00061662	1526.8	-0.00071717	1797.3	0.00061628
													722.03	-0.00062008	1541.2	-0.00071725	1808.8	0.00061617
													726.62	-0.00062342	1555.8	-0.00071734	1820.4	0.00061606
													731.23	-0.00062663	1570.5	-0.0007174	1832	0.00061596
													735.88	-0.00062974	1585.3	-0.00071747	1843.7	0.00061588
													740.55	-0.00063273	1600.3	-0.00071752	1855.5	0.00061579
													745.25	-0.00063561	1615.4	-0.00071756	1867.3	0.00061572
													749.98	-0.00063838	1630.7	-0.0007176	1879.3	0.00061565
													754.75	-0.00064105	1646.1	-0.00071764	1891.3	0.00061559
													759.54	-0.00064362	1661.7	-0.00071767	1903.4	0.00061554
													764.36	-0.0006461	1677.4	-0.0007177	1915.5	0.00061549
													769.22	-0.00064847	1693.3	-0.00071773	1927.8	0.00061544
													774.1	-0.00065076	1709.3	-0.00071774	1940.1	0.0006154
													779.02	-0.00065296	1725.4	-0.00071776	1952.5	0.00061537
													783.97	-0.00065507	1741.8	-0.00071777	1965	0.00061534
													788.95	-0.0006571	1758.2	-0.00071778	1977.5	0.0006153
													793.96	-0.00065904	1774.8	-0.00071778	1990.2	0.00061528
													799	-0.00066091	1791.6	-0.00071781	2002.9	0.00061525
													804.07	-0.0006627	1808.6	-0.00071781	2015.7	0.00061523
													809.18	-0.00066442	1825.7	-0.00071783	2028.6	0.00061521
