# Supplementary material for: Single turnover transient state kinetics reveals processive protein unfolding catalyzed by Escherichia coli ClpB
Source: eLife. 2024 Oct 7;13:RP99052. doi: 10.7554/eLife.99052 (PMC11458177; doi:10.7554/eLife.99052)
Supplement: Figure 4—figure supplement 1—source data 1. — n data points as a function of total length of substrate (Figure 4—figure supplement 1A) and reduced length of substrate (Figure 4—figure supplement 1B) are tabulated here. [file elife-99052-fig4-figsupp1-data1.xlsx]

## Sheet: Supp Figure 6
	Suppl Figure 6 A
n	Total length of substrate (aa)
1.0917	168
2.8601	265
4.1132	362
	Suppl Figure 6 B
n	Reduced length of substrate(aa)
1.0917	50
2.8601	147
4.1132	244
