# Supplementary material for: Single turnover transient state kinetics reveals processive protein unfolding catalyzed by Escherichia coli ClpB
Source: eLife. 2024 Oct 7;13:RP99052. doi: 10.7554/eLife.99052 (PMC11458177; doi:10.7554/eLife.99052)
Supplement: Figure 4—figure supplement 2—source data 1. — The error bars for each relative fluorescence enhancement data point are tabulated here as standard deviation. The data points corresponding to the fits shown in black in Figure 4—figure supplement 2A are tabulated after ‘fit data to Scheme 1 for each RepA-TitinX substrate. The sheet labeled ‘Supp Figure B’ are data points for total length vs. peak time plot shown in Figure 4—figure supplement 2B at each Δt1. The sheet labeled ‘Supp Figure C’ has data points for the rate of translocation as a function of Δt1 shown in Figure 4—figure supplement 2C. The error bars represented in Figure 4—figure supplement 2C are tabulated as the standard deviation in this sheet for each corresponding rate of translocation. The sheet labeled ‘Figure D’ consists of data points for pre-translocated distance as a function of Δt1, as shown in Figure 4—figure supplement 2D. The error bars represented in Figure 4—figure supplement 2D are tabulated as the standard deviation in this sheet for each corresponding pre-translocated distance. [file elife-99052-fig4-figsupp2-data1.xlsx]

## Sheet: Supp Figure D
Dt1 (s)	pre-translocated distance(aa)	Standard deviation (aa)
300	79.875	11.899
420	86.337	11.042
600	93.93	8.5002

## Sheet: Supp Figure C
Dt1 (s)	rate of translocation (aa s-1)	Standard deviation (aa s-1)
300	4.3636	0.40656
420	4.2983	0.25532
600	4.2164	0.27968

## Sheet: Supp Figure B
Dt1 300 s	Total length of substrate(aa)	Peak time(s)	Standard deviation(s)
	168	20.923	0.42771
	265	41.111	1.273
	362	65.473	3.6255
Dt1 420 s	Total length of substrate(aa)	Peak time(s)	Standard deviation(s)
	168	20.927	0.64376
	265	40.46	0.42226
	362	67.21	5.3398
Dt1 600 s	Total length of substrate(aa)	Peak time(s)	Standard deviation(s)
	168	18.24	0.15588
	265	39.35	0.69936
	362	64.213	2.7096

## Sheet: Supp Figure A
	RepA-Titin 1			RepA-Titin 2			RepA-Titin 3				Fit data to Scheme 1			RepA-Titin1		RepA-Titin 2		RepA-Titin 3
time (s)	Relative fluorescence enhancement	Standard deviation	time (s)	Relative fluorescence enhancement	Standard deviation	time (s)	Relative fluorescence enhancement	Standard deviation					time (s)	Relative fluorescence enhancement	time (s)	Relative fluorescence enhancement	time (s)	Relative fluorescence enhancement
0.018863	-0.0011419	0.0032885	0.018863	0.0014231	0.0054227	0.011312	-0.00063666	0.0020243					0.018863	4.3427e-06	0.018863	4.8351e-10	0.011312	9.6872e-15
0.038013	-0.00036813	0.0028029	0.038013	0.0021057	0.0043484	0.022813	-0.00064753	0.0037325					0.019039	4.3914e-06	0.019041	4.9539e-10	0.011428	1.0085e-14
0.05745	0.0013009	0.0025499	0.05745	0.0006459	0.0033611	0.034475	-0.0010992	0.0026262					0.019217	4.4407e-06	0.019221	5.0755e-10	0.011546	1.05e-14
0.077188	-1.8848e-06	0.0028408	0.077188	-0.0019553	0.00235	0.046312	8.0844e-05	0.0047454					0.019397	4.4904e-06	0.019403	5.2002e-10	0.011664	1.0931e-14
0.097213	0.001333	0.0020873	0.097213	0.0019711	0.0028901	0.058325	-0.0013243	0.002117					0.019579	4.5408e-06	0.019586	5.3279e-10	0.011783	1.138e-14
0.11754	-0.00012683	0.0030507	0.11754	0.0016643	0.0022585	0.070525	0.0017449	0.0046631					0.019762	4.5917e-06	0.019771	5.4587e-10	0.011904	1.1847e-14
0.13817	-0.0015653	0.0029714	0.13817	-0.00028686	0.0022394	0.082912	-0.00013625	0.0019538					0.019947	4.6432e-06	0.019958	5.5927e-10	0.012026	1.2334e-14
0.15913	-0.0011532	0.0014893	0.15913	-0.0012618	0.0014526	0.095475	-0.00013637	0.0042671					0.020134	4.6952e-06	0.020147	5.7301e-10	0.012149	1.2841e-14
0.1804	-0.00058496	0.0016872	0.1804	0.00010504	0.0029447	0.10824	0.00066819	0.0023708					0.020323	4.7478e-06	0.020337	5.8708e-10	0.012274	1.3368e-14
0.20199	0.00035206	0.0021466	0.20199	0.00070779	0.0028531	0.12119	0.00044738	0.0032901					0.020513	4.8011e-06	0.02053	6.0149e-10	0.0124	1.3917e-14
0.2239	-0.00073668	0.0032578	0.2239	-0.0012991	0.0027625	0.13434	-0.00098248	0.0027436					0.020705	4.8549e-06	0.020724	6.1626e-10	0.012527	1.4489e-14
0.24614	-0.00012985	0.0026998	0.24614	-0.0013938	0.0029825	0.14769	-0.00036247	0.0038324					0.020899	4.9093e-06	0.02092	6.314e-10	0.012655	1.5084e-14
0.26871	-0.00071471	0.0021019	0.26871	-0.0014824	0.0022241	0.16123	-0.00029601	0.0029685					0.021095	4.9643e-06	0.021117	6.469e-10	0.012785	1.5703e-14
0.29164	0.00064443	0.002427	0.29164	-0.0007498	0.002356	0.17499	-0.00010817	0.0034278					0.021292	5.02e-06	0.021317	6.6278e-10	0.012916	1.6348e-14
0.3149	0.00072882	0.0026895	0.3149	0.00062195	0.0020921	0.18894	0.00027164	0.001465					0.021491	5.0763e-06	0.021519	6.7906e-10	0.013048	1.702e-14
0.33852	0.00076744	0.0024502	0.33852	-0.0019101	0.0020752	0.20311	-0.00066161	0.0026933					0.021693	5.1332e-06	0.021722	6.9573e-10	0.013182	1.7718e-14
0.36249	-0.0015483	0.0013719	0.36249	-0.00051164	0.0025008	0.2175	-2.013e-05	0.0019597					0.021896	5.1907e-06	0.021927	7.1282e-10	0.013317	1.8446e-14
0.38682	0.0006071	0.0032323	0.38682	-0.00027581	0.0022497	0.2321	-0.00028685	0.0010913					0.022101	5.2489e-06	0.022135	7.3032e-10	0.013453	1.9203e-14
0.41153	0.00014525	0.0017725	0.41153	-2.1919e-05	0.0028893	0.24691	-0.00048689	0.0029041					0.022308	5.3077e-06	0.022344	7.4825e-10	0.013591	1.9992e-14
0.4366	-0.00028477	0.0016668	0.4366	0.0010153	0.0021832	0.26196	-0.00026518	0.0028854					0.022517	5.3672e-06	0.022555	7.6662e-10	0.013731	2.0813e-14
0.46206	-0.00090925	0.0019146	0.46206	-0.0009478	0.0016282	0.27724	0.00014639	0.0029448					0.022727	5.4274e-06	0.022769	7.8544e-10	0.013871	2.1667e-14
0.4879	-0.00043692	0.0020622	0.4879	0.00060281	0.0023889	0.29274	0.0012745	0.0023773					0.02294	5.4882e-06	0.022984	8.0473e-10	0.014013	2.2556e-14
0.51412	0.0010312	0.0025427	0.51412	-0.00070075	0.0024254	0.30847	0.00018833	0.003495					0.023155	5.5497e-06	0.023201	8.2449e-10	0.014157	2.3482e-14
0.54075	-0.00030579	0.0021596	0.54075	0.00052072	0.0019546	0.32445	-2.3826e-05	0.0022492					0.023372	5.6119e-06	0.02342	8.4473e-10	0.014302	2.4446e-14
0.56778	0.0015734	0.0034407	0.56778	-0.00025043	0.0021293	0.34066	-0.0017165	0.0027123					0.023591	5.6748e-06	0.023642	8.6547e-10	0.014449	2.545e-14
0.5952	-0.0011673	0.00098642	0.5952	-0.0002686	0.0019212	0.35713	0.0014691	0.002118					0.023812	5.7384e-06	0.023865	8.8672e-10	0.014597	2.6494e-14
0.62305	0.00052602	0.0014987	0.62305	0.001312	0.0023139	0.37383	0.00037832	0.0020516					0.024034	5.8027e-06	0.024091	9.0849e-10	0.014746	2.7582e-14
0.65131	-0.00036409	0.0012788	0.65131	-0.00094766	0.0015897	0.39079	0.00079363	0.0024416					0.02426	5.8678e-06	0.024319	9.3079e-10	0.014898	2.8714e-14
0.68001	0.00030071	0.0034085	0.68001	-0.00010981	0.0018825	0.408	-0.00074944	0.0022971					0.024487	5.9335e-06	0.024549	9.5365e-10	0.01505	2.9892e-14
0.70914	0.00015579	0.0022909	0.70914	0.00068127	0.002736	0.42549	0.0019826	0.002899					0.024716	6e-06	0.024781	9.7706e-10	0.015204	3.1119e-14
0.7387	0.0020738	0.0029497	0.7387	0.00099679	0.0019538	0.44322	-0.0021756	0.0023538					0.024947	6.0673e-06	0.025015	1.0011e-09	0.01536	3.2396e-14
0.76871	-0.0006874	0.0014949	0.76871	-0.00079556	0.0012658	0.46123	0.00037599	0.002695					0.025181	6.1353e-06	0.025252	1.0256e-09	0.015518	3.3725e-14
0.79918	-2.9008e-05	0.0023808	0.79918	-0.00065499	0.0021425	0.47951	0.0017802	0.0045974					0.025417	6.204e-06	0.02549	1.0508e-09	0.015677	3.5109e-14
0.8301	0.00018549	0.0025386	0.8301	0.00082102	0.0010181	0.49806	-0.00091278	0.0019324					0.025655	6.2736e-06	0.025731	1.0766e-09	0.015837	3.6549e-14
0.8615	-0.00059654	0.0021206	0.8615	-0.0012498	0.0014252	0.5169	0.00073338	0.0026058					0.025895	6.3439e-06	0.025975	1.103e-09	0.016	3.8049e-14
0.89336	-0.0011568	0.0019957	0.89336	0.00014822	0.0028304	0.53601	-0.00062476	0.0031385					0.026137	6.415e-06	0.02622	1.1301e-09	0.016164	3.961e-14
0.92571	0.00022194	0.0020362	0.92571	-0.00045652	0.0028324	0.55542	-0.00041824	0.0022568					0.026382	6.4868e-06	0.026468	1.1579e-09	0.016329	4.1234e-14
0.95854	-2.7883e-05	0.001853	0.95854	4.2645e-05	0.0018511	0.57512	1.8526e-05	0.001895					0.026629	6.5595e-06	0.026718	1.1863e-09	0.016497	4.2926e-14
0.99187	-0.00096348	0.00072148	0.99187	0.00099012	0.0012853	0.59513	0.00061385	0.0023052					0.026879	6.633e-06	0.026971	1.2154e-09	0.016666	4.4687e-14
1.0257	0.00022006	0.0018263	1.0257	-0.00027378	0.001841	0.61542	0.0010437	0.0027416					0.02713	6.7074e-06	0.027226	1.2452e-09	0.016836	4.652e-14
1.0601	0.0022792	0.0017349	1.0601	-0.00013531	0.0014149	0.63603	5.9963e-05	0.0025573					0.027384	6.7825e-06	0.027483	1.2758e-09	0.017009	4.8427e-14
1.0949	-4.7963e-05	0.0016357	1.0949	0.00075164	0.0026603	0.65695	0.00088161	0.0032804					0.027641	6.8585e-06	0.027743	1.3071e-09	0.017183	5.0414e-14
1.1303	0.0013525	0.0018425	1.1303	0.00017205	0.0015704	0.67817	1.5092e-05	0.0022732					0.027899	6.9354e-06	0.028006	1.3392e-09	0.017359	5.2481e-14
1.1662	6.1305e-05	0.0031679	1.1662	0.0015344	0.0015683	0.69974	0.000367	0.002101					0.028161	7.0131e-06	0.02827	1.3721e-09	0.017537	5.4633e-14
1.2027	4.1526e-05	0.0021288	1.2027	-1.0266e-05	0.0016913	0.72161	-0.0011143	0.0018198					0.028424	7.0917e-06	0.028538	1.4057e-09	0.017717	5.6873e-14
1.2397	-0.00061918	0.0014873	1.2397	0.0011437	0.0023875	0.74383	1.7904e-05	0.002145					0.02869	7.1712e-06	0.028808	1.4403e-09	0.017899	5.9205e-14
1.2773	0.001499	0.0017519	1.2773	0.00029438	0.0010516	0.76636	-0.00117	0.0020599					0.028959	7.2515e-06	0.02908	1.4756e-09	0.018082	6.1632e-14
1.3154	9.2991e-05	0.0016813	1.3154	0.00088838	0.0021594	0.78925	-0.0016739	0.0028624					0.02923	7.3328e-06	0.029355	1.5118e-09	0.018267	6.4159e-14
1.3541	0.0016884	0.0023073	1.3541	0.00089744	0.0017823	0.81248	-0.0013765	0.0025289					0.029504	7.4149e-06	0.029632	1.5489e-09	0.018454	6.6789e-14
1.3934	0.002035	0.0018676	1.3934	0.00044736	0.0019771	0.83606	-0.00055641	0.0024467					0.02978	7.498e-06	0.029913	1.587e-09	0.018644	6.9527e-14
1.4333	0.00074687	0.0011793	1.4333	-0.00027678	0.002824	0.85999	0.00015511	0.0025725					0.030059	7.582e-06	0.030195	1.6259e-09	0.018835	7.2377e-14
1.4738	0.00041963	0.0018457	1.4738	0.00047886	0.0013517	0.88429	0.00075636	0.0031231					0.030341	7.6669e-06	0.030481	1.6658e-09	0.019028	7.5344e-14
1.5149	0.0017218	0.0019725	1.5149	0.00042166	0.0019724	0.90895	0.0015577	0.0024137					0.030625	7.7528e-06	0.030769	1.7067e-09	0.019223	7.8432e-14
1.5567	0.00068869	0.0019964	1.5567	-0.00018904	0.0012091	0.93399	0.0021035	0.00046588					0.030911	7.8397e-06	0.03106	1.7486e-09	0.01942	8.1646e-14
1.599	0.00036626	0.0014845	1.599	0.0015085	0.0018478	0.9594	0.00028095	0.0020065					0.031201	7.9275e-06	0.031354	1.7915e-09	0.019619	8.4992e-14
1.642	0.00042389	0.0020737	1.642	0.0011212	0.0024623	0.9852	-0.00027273	0.0019983					0.031493	8.0163e-06	0.03165	1.8355e-09	0.01982	8.8475e-14
1.6856	0.00049326	0.0025146	1.6856	0.00054154	0.0021317	1.0114	0.00028401	0.0017027					0.031788	8.1061e-06	0.031949	1.8805e-09	0.020023	9.21e-14
1.7299	0.000893	0.0026573	1.7299	-0.0010206	0.0015307	1.038	0.00055045	0.0014454					0.032085	8.197e-06	0.032251	1.9267e-09	0.020228	9.5873e-14
1.7749	0.0010864	0.0013592	1.7749	-0.00057036	0.0010827	1.0649	0.00031654	0.0014658					0.032386	8.2888e-06	0.032556	1.974e-09	0.020435	9.9801e-14
1.8206	0.00038395	0.0016049	1.8206	9.0696e-05	0.0033886	1.0923	-0.00018907	0.0015836					0.032689	8.3816e-06	0.032864	2.0224e-09	0.020645	1.0389e-13
1.8669	0.0025223	0.0014276	1.8669	0.0012595	0.0016963	1.1201	0.00035782	0.0018574					0.032995	8.4755e-06	0.033175	2.072e-09	0.020856	1.0814e-13
1.9139	0.00089102	0.0011201	1.9139	0.0012534	0.0022053	1.1484	-0.00097366	0.0025354					0.033304	8.5705e-06	0.033488	2.1229e-09	0.02107	1.1258e-13
1.9617	0.00033239	0.0023447	1.9617	0.00035156	0.0011387	1.177	-0.0017683	0.0022922					0.033616	8.6665e-06	0.033805	2.175e-09	0.021286	1.1719e-13
2.0102	0.0011169	0.0015013	2.0102	0.00041357	0.0020794	1.2061	-0.00059236	0.0024024					0.033931	8.7636e-06	0.034125	2.2284e-09	0.021504	1.2198e-13
2.0594	-3.0511e-05	0.0012258	2.0594	-7.497e-05	0.0019838	1.2356	0.0002656	0.0016687					0.034248	8.8617e-06	0.034447	2.283e-09	0.021725	1.2698e-13
2.1093	0.0011013	0.0025714	2.1093	-0.00019135	0.0015429	1.2656	0.0016852	0.0015895					0.034569	8.961e-06	0.034773	2.3391e-09	0.021947	1.3218e-13
2.16	0.0023611	0.0033109	2.16	0.00029347	0.0014734	1.296	-0.00050127	0.0034386					0.034893	9.0614e-06	0.035102	2.3965e-09	0.022172	1.3759e-13
2.2115	-9.2968e-05	0.0016416	2.2115	0.00056557	0.0018401	1.3269	0.00085057	0.002171					0.03522	9.1629e-06	0.035434	2.4553e-09	0.022399	1.4323e-13
2.2637	0.0011438	0.0011137	2.2637	0.0006793	0.0020843	1.3582	0.0015472	0.0025822					0.035549	9.2655e-06	0.035769	2.5155e-09	0.022629	1.4909e-13
2.3167	0.00081209	0.00077386	2.3167	0.00023233	0.0012489	1.39	0.0010525	0.0016935					0.035882	9.3693e-06	0.036107	2.5772e-09	0.022861	1.5519e-13
2.3706	-8.9313e-05	0.0013366	2.3706	0.00052067	0.0018349	1.4223	-0.0012616	0.0015649					0.036218	9.4742e-06	0.036448	2.6405e-09	0.023095	1.6155e-13
2.4252	0.001152	0.0021015	2.4252	0.00042371	0.0014883	1.4551	0.00068063	0.002438					0.036557	9.5803e-06	0.036793	2.7053e-09	0.023332	1.6816e-13
2.4807	0.00068166	0.0014701	2.4807	0.00015582	0.0014744	1.4884	0.00083721	0.0027555					0.0369	9.6876e-06	0.037141	2.7717e-09	0.023571	1.7504e-13
2.537	0.00071204	0.00085064	2.537	-0.00022178	0.0025959	1.5222	0.00098431	0.0015026					0.037245	9.7961e-06	0.037492	2.8397e-09	0.023812	1.8221e-13
2.5941	0.0014208	0.0017186	2.5941	3.7674e-05	0.0016567	1.5565	-0.00024833	0.0011384					0.037594	9.9058e-06	0.037846	2.9093e-09	0.024056	1.8966e-13
2.6521	0.00075284	0.0018163	2.6521	0.00089172	0.0015046	1.5913	0.00033569	0.0026119					0.037946	1.0017e-05	0.038204	2.9807e-09	0.024303	1.9742e-13
2.711	0.0016221	0.0022339	2.711	0.00011772	0.0016289	1.6266	0.0013334	0.0018383					0.038301	1.0129e-05	0.038565	3.0539e-09	0.024552	2.055e-13
2.7708	0.0010008	0.0018165	2.7708	-4.7771e-05	0.0011595	1.6625	-0.00026849	0.0037194					0.03866	1.0242e-05	0.03893	3.1288e-09	0.024804	2.1391e-13
2.8315	0.00085483	0.001727	2.8315	-0.00012161	0.00026896	1.6989	-0.00031617	0.00087646					0.039022	1.0357e-05	0.039298	3.2055e-09	0.025058	2.2266e-13
2.8931	0.0013883	0.00085296	2.8931	0.00056376	0.0017355	1.7358	0.0020786	0.0022445					0.039387	1.0473e-05	0.03967	3.2842e-09	0.025315	2.3177e-13
2.9556	0.0022796	0.0013383	2.9556	-0.00073582	0.0018025	1.7734	0.00099333	0.00099144					0.039756	1.059e-05	0.040045	3.3648e-09	0.025574	2.4125e-13
3.0191	0.00075749	0.0019928	3.0191	0.00042432	0.0018682	1.8114	0.0011684	0.0029557					0.040128	1.0709e-05	0.040423	3.4473e-09	0.025836	2.5112e-13
3.0835	0.0014827	0.0023928	3.0835	0.0012658	0.0010577	1.8501	0.00025962	0.0020482					0.040504	1.0829e-05	0.040805	3.5319e-09	0.026101	2.6139e-13
3.1489	0.0020113	0.0018097	3.1489	-5.6136e-05	0.0011126	1.8893	0.00019389	0.0030684					0.040883	1.095e-05	0.041191	3.6185e-09	0.026368	2.7208e-13
3.2153	0.0013849	0.0014267	3.2153	0.0007583	0.0020394	1.9292	0.00065342	0.0020955					0.041266	1.1073e-05	0.041581	3.7073e-09	0.026639	2.832e-13
3.2827	0.0013119	0.001402	3.2827	0.00083773	0.0013441	1.9696	9.564e-05	0.0018285					0.041652	1.1197e-05	0.041974	3.7982e-09	0.026911	2.9478e-13
3.3511	0.00088385	0.001574	3.3511	0.00044967	0.0014767	2.0106	-0.00038781	0.0023898					0.042042	1.1322e-05	0.042371	3.8914e-09	0.027187	3.0683e-13
3.4205	0.0020004	0.0013601	3.4205	0.00066641	0.0003963	2.0523	0.0011072	0.0033455					0.042436	1.1449e-05	0.042771	3.9869e-09	0.027466	3.1938e-13
3.491	0.0015519	0.0012719	3.491	0.0010402	0.0011672	2.0946	0.00079828	0.0015497					0.042833	1.1577e-05	0.043176	4.0847e-09	0.027747	3.3243e-13
3.5625	0.0013909	0.0010593	3.5625	0.00029666	0.00082308	2.1375	-0.0003622	0.0014913					0.043234	1.1707e-05	0.043584	4.1848e-09	0.028032	3.4602e-13
3.6352	0.00029019	0.0016527	3.6352	0.00022335	0.0012671	2.1811	0.00013525	0.0025812					0.043639	1.1838e-05	0.043996	4.2875e-09	0.028319	3.6016e-13
3.7089	0.0017595	0.0022444	3.7089	0.0004269	0.00099802	2.2253	0.0018304	0.0019289					0.044048	1.197e-05	0.044412	4.3927e-09	0.028609	3.7488e-13
3.7837	0.0018693	0.0017058	3.7837	0.00069377	0.0014445	2.2702	0.00072883	0.0016597					0.04446	1.2104e-05	0.044832	4.5004e-09	0.028902	3.902e-13
3.8597	0.0015516	0.002062	3.8597	0.00082749	0.0020583	2.3158	0.00058138	0.00254					0.044876	1.224e-05	0.045256	4.6108e-09	0.029199	4.0614e-13
3.9368	0.0017487	0.0012113	3.9368	0.00040099	0.0011945	2.3621	0.00048708	0.0016794					0.045297	1.2377e-05	0.045684	4.7239e-09	0.029498	4.2273e-13
4.0151	0.00089148	0.0010719	4.0151	0.00029378	0.0018218	2.409	9.4845e-05	0.0010164					0.045721	1.2515e-05	0.046115	4.8397e-09	0.0298	4.4e-13
4.0945	0.0020159	0.0012	4.0945	0.00040285	0.0013808	2.4567	0.00014729	0.0017307					0.046149	1.2655e-05	0.046551	4.9585e-09	0.030105	4.5797e-13
4.1752	0.0018897	0.0006848	4.1752	0.00053155	0.0015287	2.5051	0.00046022	0.001486					0.046581	1.2797e-05	0.046992	5.0801e-09	0.030414	4.7668e-13
4.2571	0.0023958	0.00059542	4.2571	0.0011859	0.0014792	2.5542	-0.0001513	0.0015461					0.047017	1.294e-05	0.047436	5.2047e-09	0.030726	4.9614e-13
4.3402	0.0030008	0.0013675	4.3402	0.00030418	0.00096524	2.6041	0.00063084	0.0017181					0.047457	1.3085e-05	0.047884	5.3323e-09	0.031041	5.164e-13
4.4245	0.00083198	0.0014445	4.4245	0.00073022	0.0010814	2.6547	-0.00015758	0.0014652					0.047902	1.3231e-05	0.048337	5.4631e-09	0.031359	5.3749e-13
4.5102	0.0023633	0.0015122	4.5102	0.0016024	0.0020146	2.7061	0.00092438	0.0013569					0.04835	1.338e-05	0.048794	5.597e-09	0.03168	5.5943e-13
4.5971	0.0020765	0.0013187	4.5971	0.00071746	0.0014677	2.7583	0.0016456	0.0019886					0.048803	1.3529e-05	0.049255	5.7343e-09	0.032005	5.8227e-13
4.6853	0.0016682	0.0014923	4.6853	-0.00016157	0.000913	2.8112	-0.0004228	0.0017036					0.04926	1.3681e-05	0.049721	5.8749e-09	0.032333	6.0604e-13
4.7749	0.0014074	0.0016718	4.7749	0.00049457	0.0017907	2.8649	0.00087678	0.0010985					0.049721	1.3834e-05	0.050191	6.019e-09	0.032664	6.3077e-13
4.8658	0.0022198	0.0015011	4.8658	0.00065088	0.0012459	2.9195	0.00067051	0.0027265					0.050187	1.3989e-05	0.050666	6.1666e-09	0.032999	6.5651e-13
4.9581	0.0022518	0.001994	4.9581	3.8028e-05	0.0016814	2.9749	-0.00020083	0.0014125					0.050657	1.4145e-05	0.051145	6.3178e-09	0.033337	6.833e-13
5.0518	0.001822	0.0019807	5.0518	0.0014158	0.0011504	3.0311	0.00037418	0.0017157					0.051131	1.4304e-05	0.051628	6.4727e-09	0.033679	7.1118e-13
5.1469	0.002397	0.00065964	5.1469	0.00020498	0.0014878	3.0882	0.00017509	0.0011844					0.05161	1.4464e-05	0.052117	6.6314e-09	0.034024	7.402e-13
5.2435	0.0027096	0.0015334	5.2435	0.0012098	0.0010044	3.1461	0.0010901	0.0012111					0.052093	1.4625e-05	0.052609	6.794e-09	0.034372	7.7039e-13
5.3415	0.0023511	0.0011696	5.3415	0.00041456	0.001344	3.2049	5.4519e-05	0.0013014					0.052581	1.4789e-05	0.053107	6.9606e-09	0.034725	8.0181e-13
5.4409	0.0020725	0.0012514	5.4409	0.00056717	0.00097322	3.2646	6.782e-05	0.0018873					0.053073	1.4955e-05	0.053609	7.1312e-09	0.03508	8.3451e-13
5.5419	0.0022476	0.0012617	5.5419	0.0015979	0.0017558	3.3252	0.00061885	0.0018722					0.05357	1.5122e-05	0.054116	7.3061e-09	0.03544	8.6854e-13
5.6444	0.0025736	0.0012766	5.6444	0.00090523	0.0013263	3.3867	0.0012507	0.001609					0.054072	1.5291e-05	0.054627	7.4852e-09	0.035803	9.0396e-13
5.7485	0.0028476	0.0015096	5.7485	0.00039775	0.001196	3.4491	0.00071607	0.0018198					0.054578	1.5462e-05	0.055144	7.6687e-09	0.03617	9.4081e-13
5.8541	0.0022159	0.00086769	5.8541	8.6398e-05	0.00085535	3.5124	0.00065435	0.0022677					0.055089	1.5635e-05	0.055665	7.8567e-09	0.036541	9.7917e-13
5.9613	0.0021047	0.0017256	5.9613	0.0011999	0.00090397	3.5768	-0.00035877	0.0013948					0.055605	1.581e-05	0.056191	8.0493e-09	0.036915	1.0191e-12
6.0701	0.0024436	0.0024774	6.0701	0.00023869	0.00043655	3.6421	-0.00027947	0.0015293					0.056125	1.5987e-05	0.056723	8.2467e-09	0.037294	1.0606e-12
6.1806	0.0026553	0.0010206	6.1806	0.0011105	0.0014745	3.7083	0.00042729	0.0011061					0.056651	1.6166e-05	0.057259	8.4488e-09	0.037676	1.1038e-12
6.2927	0.0019813	0.0017285	6.2927	0.00105	0.00096758	3.7756	0.00022304	0.0016867					0.057181	1.6347e-05	0.0578	8.6559e-09	0.038062	1.1488e-12
6.4065	0.0027082	0.0016554	6.4065	0.00028092	0.0016593	3.8439	0.00037297	0.0018538					0.057717	1.653e-05	0.058347	8.8681e-09	0.038452	1.1956e-12
6.5221	0.0025091	0.0018329	6.5221	0.00053408	0.0011559	3.9133	0.00014471	0.0012549					0.058257	1.6715e-05	0.058898	9.0855e-09	0.038846	1.2443e-12
6.6394	0.0034201	0.0012871	6.6394	0.0011211	0.0007243	3.9836	0.00010891	0.001087					0.058803	1.6902e-05	0.059455	9.3082e-09	0.039244	1.295e-12
6.7585	0.0034282	0.00022877	6.7585	0.00023463	0.0016539	4.0551	0.001879	0.0017631					0.059353	1.7091e-05	0.060017	9.5363e-09	0.039646	1.3478e-12
6.8793	0.0031873	0.0014016	6.8793	0.00053713	0.00086235	4.1276	0.00099229	0.0013068					0.059909	1.7282e-05	0.060585	9.7701e-09	0.040052	1.4026e-12
7.002	0.0033764	0.0024974	7.002	0.00061592	0.00095924	4.2012	0.00050627	0.0016802					0.06047	1.7475e-05	0.061158	1.0009e-08	0.040463	1.4597e-12
7.1265	0.0028979	0.0014356	7.1265	0.00071126	0.00084453	4.2759	0.00012978	0.002411					0.061036	1.767e-05	0.061736	1.0255e-08	0.040878	1.5192e-12
7.2529	0.0027072	0.0014556	7.2529	0.001114	0.001273	4.3518	0.00034187	0.00080867					0.061608	1.7868e-05	0.06232	1.0506e-08	0.041297	1.581e-12
7.3813	0.0034841	0.0024557	7.3813	0.0009431	0.0010852	4.4288	-2.0362e-05	0.0011324					0.062185	1.8068e-05	0.062909	1.0764e-08	0.04172	1.6454e-12
7.5115	0.0031536	0.00081621	7.5115	0.00093269	0.0014094	4.5069	0.00093616	0.0019642					0.062767	1.827e-05	0.063504	1.1027e-08	0.042147	1.7123e-12
7.6438	0.0037025	0.0018776	7.6438	0.0013607	0.0012889	4.5862	-0.00020997	0.0014109					0.063354	1.8474e-05	0.064104	1.1298e-08	0.042579	1.782e-12
7.778	0.0036245	0.001541	7.778	0.0012898	0.0011574	4.6668	-0.00010952	0.0020097					0.063948	1.8681e-05	0.06471	1.1575e-08	0.043016	1.8545e-12
7.9142	0.0036751	0.0017077	7.9142	0.0020428	0.0012785	4.7485	0.00089339	0.0020943					0.064546	1.889e-05	0.065322	1.1858e-08	0.043456	1.9299e-12
8.0525	0.0029091	0.0016695	8.0525	0.00062958	0.00096194	4.8315	1.681e-05	0.0017335					0.065151	1.9101e-05	0.06594	1.2149e-08	0.043902	2.0084e-12
8.1929	0.0034581	0.0016967	8.1929	0.0011932	0.00053149	4.9157	0.00052506	0.0010879					0.065761	1.9315e-05	0.066563	1.2446e-08	0.044352	2.0901e-12
8.3354	0.0033099	0.0018667	8.3354	0.00088221	0.00083956	5.0012	6.3711e-05	0.0014679					0.066377	1.9531e-05	0.067192	1.2751e-08	0.044806	2.1751e-12
8.4801	0.0032922	0.0011334	8.4801	0.0015969	0.00061065	5.088	0.00064499	0.0014502					0.066998	1.9749e-05	0.067828	1.3064e-08	0.045265	2.2635e-12
8.6269	0.0040406	0.0012617	8.6269	0.0011903	0.00082067	5.1761	-4.1889e-05	0.0011391					0.067625	1.997e-05	0.068469	1.3384e-08	0.045729	2.3555e-12
8.776	0.0040124	0.0017611	8.776	0.001096	0.0015722	5.2656	0.001284	0.0010837					0.068259	2.0193e-05	0.069116	1.3712e-08	0.046198	2.4513e-12
8.9273	0.0033056	0.0015229	8.9273	0.0009221	0.001728	5.3564	0.00097081	0.001623					0.068898	2.0419e-05	0.06977	1.4048e-08	0.046671	2.5509e-12
9.0808	0.0043242	0.0011874	9.0808	0.0016014	0.00078425	5.4485	0.00069324	0.0019378					0.069543	2.0647e-05	0.070429	1.4392e-08	0.04715	2.6546e-12
9.2368	0.0038104	0.0016946	9.2368	0.0011552	0.00081832	5.542	0.00074175	0.001992					0.070194	2.0878e-05	0.071095	1.4745e-08	0.047633	2.7624e-12
9.395	0.0043218	0.0023462	9.395	0.0015089	0.0014283	5.637	0.0007338	0.0007332					0.070851	2.1111e-05	0.071767	1.5106e-08	0.048121	2.8746e-12
9.5557	0.004068	0.0013407	9.5557	0.0013804	0.0010921	5.7334	0.00079492	0.0016966					0.071515	2.1347e-05	0.072446	1.5476e-08	0.048614	2.9914e-12
9.7187	0.0036467	0.0016476	9.7187	0.002204	0.0015521	5.8313	0.00056195	0.0016898					0.072184	2.1586e-05	0.073131	1.5855e-08	0.049112	3.1129e-12
9.8843	0.0042236	0.0017583	9.8843	0.0014212	0.00095772	5.9306	0.00042389	0.0015792					0.07286	2.1827e-05	0.073822	1.6243e-08	0.049615	3.2393e-12
10.052	0.0038296	0.001413	10.052	0.0019549	0.00092934	6.0314	0.0011634	0.00077342					0.073542	2.2071e-05	0.07452	1.6641e-08	0.050124	3.3708e-12
10.223	0.004234	0.00080891	10.223	0.0010752	0.0010221	6.1337	0.00081046	0.00070792					0.074231	2.2318e-05	0.075225	1.7049e-08	0.050638	3.5076e-12
10.396	0.0042038	0.00068934	10.396	0.0015646	0.0010645	6.2376	0.00055662	0.0014947					0.074926	2.2567e-05	0.075936	1.7466e-08	0.051157	3.65e-12
10.572	0.0044911	0.0015355	10.572	0.0021446	0.0016813	6.3431	0.00038263	0.0014622					0.075628	2.2819e-05	0.076654	1.7894e-08	0.051681	3.7981e-12
10.75	0.0047406	0.00067957	10.75	0.0019184	0.0012092	6.4501	-0.0002951	0.0014896					0.076336	2.3074e-05	0.077379	1.8332e-08	0.05221	3.9522e-12
10.931	0.0037807	0.00070026	10.931	0.0019561	0.00075736	6.5588	0.0008675	0.0017721					0.07705	2.3332e-05	0.07811	1.8781e-08	0.052745	4.1125e-12
11.115	0.0038413	0.0016396	11.115	0.0016285	0.0015004	6.6691	0.00078685	0.0010804					0.077772	2.3593e-05	0.078849	1.9241e-08	0.053286	4.2793e-12
11.302	0.0045692	0.0012597	11.302	0.001478	0.00098339	6.781	0.00068773	0.0011577					0.0785	2.3856e-05	0.079594	1.9713e-08	0.053832	4.4528e-12
11.491	0.0043956	0.0013759	11.491	0.001955	0.0011108	6.8947	0.00087729	0.0015615					0.079235	2.4123e-05	0.080347	2.0195e-08	0.054384	4.6334e-12
11.683	0.0044314	0.0014478	11.683	0.0020609	0.0015217	7.01	0.0010765	0.0013118					0.079977	2.4393e-05	0.081107	2.069e-08	0.054941	4.8212e-12
11.879	0.0040739	0.00086	11.879	0.002184	0.00090948	7.1272	0.0009827	0.0011822					0.080726	2.4665e-05	0.081873	2.1196e-08	0.055504	5.0166e-12
12.077	0.0043259	0.001355	12.077	0.0015926	0.0013157	7.246	0.00048437	0.0011043					0.081482	2.4941e-05	0.082647	2.1715e-08	0.056073	5.2199e-12
12.278	0.0049929	0.00053985	12.278	0.0016446	0.0012453	7.3667	0.0011345	0.0015359					0.082245	2.5219e-05	0.083429	2.2247e-08	0.056648	5.4314e-12
12.482	0.0040248	0.0011269	12.482	0.0020416	0.0010035	7.4892	0.00047547	0.0010605					0.083015	2.5501e-05	0.084218	2.2792e-08	0.057228	5.6514e-12
12.689	0.0046373	0.00085298	12.689	0.0021769	0.0009287	7.6136	0.0004208	0.0013638					0.083792	2.5786e-05	0.085014	2.335e-08	0.057815	5.8804e-12
12.9	0.0047262	0.0008771	12.9	0.0021441	0.00057798	7.7398	0.0007208	0.0012533					0.084577	2.6074e-05	0.085818	2.3921e-08	0.058407	6.1185e-12
13.113	0.0041525	0.0015089	13.113	0.0023919	0.00099999	7.8679	-1.7919e-05	0.0010012					0.085369	2.6365e-05	0.086629	2.4507e-08	0.059006	6.3662e-12
13.33	0.0055268	0.0011014	13.33	0.0015102	0.0013536	7.9979	0.00087209	0.0012077					0.086168	2.6659e-05	0.087448	2.5107e-08	0.05961	6.624e-12
13.55	0.0050662	0.001122	13.55	0.0022585	0.0012508	8.13	0.00059021	0.0014065					0.086975	2.6957e-05	0.088275	2.5721e-08	0.060221	6.8921e-12
13.773	0.004709	0.001282	13.773	0.0019709	0.0005316	8.264	0.00036313	0.0011693					0.087789	2.7258e-05	0.089109	2.6351e-08	0.060838	7.171e-12
14	0.0048767	0.0016024	14	0.0021547	0.0009673	8.4	0.0003838	0.0018726					0.088611	2.7563e-05	0.089952	2.6996e-08	0.061462	7.4611e-12
14.23	0.004208	0.00095263	14.23	0.0023024	0.0009402	8.5381	0.0012009	0.00092948					0.089441	2.787e-05	0.090802	2.7657e-08	0.062092	7.7629e-12
14.464	0.0045682	0.0012299	14.464	0.0025272	0.0010848	8.6783	0.00066842	0.0010127					0.090278	2.8182e-05	0.091661	2.8334e-08	0.062728	8.0769e-12
14.701	0.0053112	0.0020538	14.701	0.0025319	0.0014074	8.8205	0.00028063	0.0012633					0.091124	2.8496e-05	0.092528	2.9027e-08	0.063371	8.4035e-12
14.942	0.0047892	0.0014459	14.942	0.0025504	0.00082175	8.965	-5.0484e-05	0.0010951					0.091977	2.8814e-05	0.093402	2.9738e-08	0.06402	8.7433e-12
15.186	0.005076	0.00082321	15.186	0.0030374	0.0012496	9.1116	1.9668e-05	0.0010403					0.092838	2.9136e-05	0.094285	3.0465e-08	0.064676	9.0967e-12
15.434	0.0052034	0.00095905	15.434	0.0028385	0.00060545	9.2604	0.00040211	0.0013056					0.093707	2.9461e-05	0.095177	3.1211e-08	0.065339	9.4643e-12
15.686	0.0049414	0.00089492	15.686	0.0031848	0.00055179	9.4115	0.00030083	0.0013956					0.094585	2.979e-05	0.096077	3.1975e-08	0.066009	9.8467e-12
15.941	0.0043426	0.0013904	15.941	0.0031388	0.001108	9.5648	0.0008089	0.0024019					0.09547	3.0123e-05	0.096985	3.2757e-08	0.066685	1.0244e-11
16.201	0.0049899	0.0015582	16.201	0.003199	0.00078517	9.7205	0.001001	0.00083238					0.096364	3.0459e-05	0.097902	3.3559e-08	0.067369	1.0658e-11
16.464	0.0048858	0.0011073	16.464	0.0027934	0.00069472	9.8785	0.00037693	0.0019806					0.097267	3.0799e-05	0.098828	3.438e-08	0.068059	1.1089e-11
16.732	0.0052425	0.00094468	16.732	0.0034228	0.00054549	10.039	0.00082339	0.00096556					0.098177	3.1143e-05	0.099762	3.5221e-08	0.068756	1.1536e-11
17.003	0.0047918	0.0011323	17.003	0.0034254	0.001251	10.202	0.00038267	0.00094946					0.099097	3.149e-05	0.10071	3.6083e-08	0.069461	1.2002e-11
17.278	0.004431	0.0016565	17.278	0.0034851	0.0010463	10.367	0.00025525	0.0010852					0.10002	3.1842e-05	0.10166	3.6965e-08	0.070173	1.2486e-11
17.558	0.0052037	0.0011782	17.558	0.0034645	0.00062675	10.535	0.00029808	0.00093873					0.10096	3.2197e-05	0.10262	3.787e-08	0.070892	1.299e-11
17.842	0.0054858	0.001211	17.842	0.0038248	0.0011327	10.705	0.00013871	0.00096349					0.10191	3.2556e-05	0.10359	3.8796e-08	0.071618	1.3514e-11
18.13	0.0046432	0.0014527	18.13	0.0036374	0.00087342	10.878	0.00078164	0.00091895					0.10286	3.292e-05	0.10457	3.9745e-08	0.072352	1.4059e-11
18.422	0.0048203	0.0010522	18.422	0.0040881	0.0012509	11.053	0.00070048	0.00104					0.10382	3.3287e-05	0.10556	4.0717e-08	0.073094	1.4626e-11
18.719	0.004286	0.00090573	18.719	0.0038224	0.001108	11.232	0.00039968	0.0013583					0.1048	3.3658e-05	0.10655	4.1713e-08	0.073843	1.5216e-11
19.021	0.004888	0.00078974	19.021	0.0039693	0.0011947	11.412	0.00090418	0.0011826					0.10578	3.4034e-05	0.10756	4.2733e-08	0.0746	1.5829e-11
19.327	0.0047044	0.0012038	19.327	0.0041548	0.00093299	11.596	0.00044356	0.00050582					0.10677	3.4414e-05	0.10858	4.3778e-08	0.075364	1.6467e-11
19.637	0.0046051	0.0010299	19.637	0.0039827	0.00070933	11.782	0.00046299	0.0015439					0.10777	3.4797e-05	0.10961	4.4849e-08	0.076136	1.713e-11
19.952	0.0046822	0.00081857	19.952	0.0041519	0.00066482	11.971	0.00057256	0.00077314					0.10878	3.5186e-05	0.11064	4.5945e-08	0.076917	1.782e-11
20.272	0.005653	0.0012475	20.272	0.0038788	0.00094219	12.163	0.00074797	0.00053106					0.10979	3.5578e-05	0.11169	4.7069e-08	0.077705	1.8538e-11
20.597	0.0049288	0.00097022	20.597	0.0041904	0.0011848	12.358	0.00068155	0.00093171					0.11082	3.5975e-05	0.11274	4.822e-08	0.078501	1.9284e-11
20.927	0.0048011	0.0012139	20.927	0.0045351	0.0010665	12.556	0.00084297	0.0012556					0.11186	3.6376e-05	0.11381	4.9399e-08	0.079306	2.006e-11
21.261	0.0047743	0.0011498	21.261	0.0049625	0.0010232	12.757	0.00055471	0.00097918					0.11291	3.6782e-05	0.11489	5.0607e-08	0.080118	2.0867e-11
21.601	0.0051992	0.0013812	21.601	0.0052134	0.000909	12.961	0.0003332	0.00046115					0.11396	3.7192e-05	0.11597	5.1844e-08	0.08094	2.1707e-11
21.946	0.0044642	0.0007438	21.946	0.0046138	0.00078748	13.168	0.00036492	0.001012					0.11503	3.7607e-05	0.11707	5.3111e-08	0.081769	2.258e-11
22.296	0.0042748	0.0010887	22.296	0.0049458	0.00084886	13.378	0.00096418	0.0013725					0.11611	3.8026e-05	0.11818	5.441e-08	0.082607	2.3488e-11
22.652	0.0047371	0.0005598	22.652	0.0046609	0.00081668	13.591	0.00096584	0.0010385					0.1172	3.845e-05	0.11929	5.5739e-08	0.083454	2.4432e-11
23.012	0.0043262	0.0012536	23.012	0.0046113	0.0012355	13.807	0.00037226	0.00076586					0.11829	3.8879e-05	0.12042	5.7102e-08	0.084309	2.5414e-11
23.378	0.0053483	0.00094774	23.378	0.0051041	0.001351	14.027	0.00071378	0.00078813					0.1194	3.9312e-05	0.12156	5.8498e-08	0.085173	2.6435e-11
23.75	0.0046119	0.0013722	23.75	0.0049384	0.0010141	14.25	0.00095575	0.00082549					0.12052	3.975e-05	0.12271	5.9927e-08	0.086046	2.7497e-11
24.127	0.0048069	0.00073886	24.127	0.0055353	0.00097238	14.476	0.0014611	0.00094475					0.12165	4.0193e-05	0.12387	6.1392e-08	0.086927	2.8601e-11
24.51	0.0046754	0.0014086	24.51	0.0054775	0.0012795	14.706	0.00066303	0.00082217					0.12279	4.0641e-05	0.12504	6.2892e-08	0.087818	2.975e-11
24.899	0.0044365	0.0011396	24.899	0.0055055	0.0013112	14.939	0.00098846	0.0011528					0.12394	4.1094e-05	0.12622	6.4429e-08	0.088718	3.0944e-11
25.294	0.0047632	0.00085316	25.294	0.0056049	0.0010388	15.176	0.0010888	0.00039683					0.1251	4.1552e-05	0.12742	6.6003e-08	0.089627	3.2186e-11
25.694	0.0045464	0.0011639	25.694	0.0059484	0.0015783	15.417	0.00067357	0.0012142					0.12627	4.2015e-05	0.12862	6.7616e-08	0.090546	3.3477e-11
26.101	0.0044073	0.001423	26.101	0.0050505	0.00081638	15.66	0.00062227	0.00031711					0.12745	4.2483e-05	0.12984	6.9268e-08	0.091474	3.482e-11
26.514	0.0044256	0.001044	26.514	0.0059152	0.0011414	15.908	0.00022605	0.00099215					0.12864	4.2957e-05	0.13106	7.096e-08	0.092411	3.6216e-11
26.933	0.004394	0.0012876	26.933	0.0056486	0.0015025	16.16	0.0010839	0.00085279					0.12985	4.3435e-05	0.1323	7.2694e-08	0.093358	3.7667e-11
27.358	0.0043064	0.0012345	27.358	0.0060076	0.0012266	16.415	0.00079043	0.00087153					0.13106	4.3919e-05	0.13355	7.447e-08	0.094315	3.9177e-11
27.79	0.0043353	0.0014749	27.79	0.0064096	0.0010458	16.674	0.00071513	0.00073697					0.13229	4.4408e-05	0.13482	7.6289e-08	0.095282	4.0747e-11
28.228	0.0042322	0.0010785	28.228	0.0061527	0.00092467	16.937	0.00034767	0.00057951					0.13353	4.4903e-05	0.13609	7.8152e-08	0.096258	4.2379e-11
28.673	0.0044161	0.0009226	28.673	0.006065	0.0011744	17.204	0.00079844	0.00050864					0.13478	4.5403e-05	0.13738	8.0061e-08	0.097244	4.4076e-11
29.124	0.0039736	0.0015562	29.124	0.0066036	0.0011001	17.475	0.00082371	0.00038777					0.13604	4.5909e-05	0.13868	8.2016e-08	0.098241	4.584e-11
29.583	0.0039838	0.0011111	29.583	0.0060132	0.0010029	17.75	0.00075282	0.00082106					0.13732	4.642e-05	0.13999	8.4019e-08	0.099248	4.7674e-11
30.048	0.0039778	0.0010807	30.048	0.0062177	0.0008789	18.029	0.00094173	0.00056745					0.1386	4.6937e-05	0.14131	8.6071e-08	0.10026	4.9582e-11
30.52	0.0040585	0.000926	30.52	0.0061378	0.0011607	18.312	0.00056219	0.00072372					0.1399	4.746e-05	0.14265	8.8172e-08	0.10129	5.1565e-11
31	0.003845	0.0015431	31	0.0064904	0.0010218	18.6	0.00097476	0.00089942					0.14121	4.7988e-05	0.144	9.0325e-08	0.10233	5.3626e-11
31.486	0.0041012	0.0010301	31.486	0.0070062	0.00092123	18.892	0.0011479	0.00055305					0.14253	4.8522e-05	0.14536	9.253e-08	0.10338	5.577e-11
31.981	0.0036353	0.00093821	31.981	0.0063559	0.0010945	19.188	0.001163	0.00082356					0.14387	4.9062e-05	0.14673	9.4789e-08	0.10444	5.7999e-11
32.482	0.0034579	0.00088159	32.482	0.0065953	0.00076449	19.489	0.0010593	0.00059831					0.14521	4.9609e-05	0.14812	9.7104e-08	0.10551	6.0316e-11
32.991	0.0041604	0.0012133	32.991	0.0065247	0.0011152	19.795	0.001142	0.00087783					0.14657	5.0161e-05	0.14952	9.9474e-08	0.10659	6.2724e-11
33.508	0.0037375	0.0011234	33.508	0.0068139	0.00093911	20.105	0.0008428	0.00049208					0.14795	5.0719e-05	0.15093	1.019e-07	0.10768	6.5229e-11
34.032	0.0039116	0.00063351	34.032	0.0070626	0.0013674	20.42	0.00096606	0.0011851					0.14933	5.1283e-05	0.15236	1.0439e-07	0.10879	6.7832e-11
34.565	0.0032135	0.00091444	34.565	0.0069251	0.0010214	20.739	0.0014769	0.00063461					0.15073	5.1854e-05	0.1538	1.0694e-07	0.1099	7.0539e-11
35.105	0.0030632	0.001397	35.105	0.0068705	0.001186	21.063	0.0012148	0.00099915					0.15214	5.2431e-05	0.15526	1.0955e-07	0.11103	7.3352e-11
35.654	0.0033113	0.0011736	35.654	0.0072027	0.00046262	21.392	0.0011566	0.00054125					0.15356	5.3015e-05	0.15672	1.1222e-07	0.11216	7.6277e-11
36.211	0.0033808	0.001077	36.211	0.0065252	0.00078654	21.727	0.0012065	0.0011488					0.155	5.3604e-05	0.1582	1.1496e-07	0.11331	7.9317e-11
36.776	0.0032591	0.0011147	36.776	0.007026	0.0011839	22.066	0.0017578	0.0013887					0.15645	5.4201e-05	0.1597	1.1776e-07	0.11448	8.2478e-11
37.35	0.0031651	0.00097145	37.35	0.0072773	0.00078797	22.41	0.0011095	0.00095587					0.15792	5.4804e-05	0.16121	1.2063e-07	0.11565	8.5764e-11
37.933	0.0030735	0.00068092	37.933	0.0070525	0.00092091	22.76	0.0012642	0.0010837					0.1594	5.5413e-05	0.16273	1.2358e-07	0.11683	8.9179e-11
38.524	0.0031643	0.0010216	38.524	0.0070603	0.0011787	23.114	0.0012962	0.0011091					0.16089	5.6029e-05	0.16427	1.2659e-07	0.11803	9.2729e-11
39.124	0.0027885	0.0014556	39.124	0.0071362	0.0013446	23.475	0.0015493	0.00097399					0.1624	5.6653e-05	0.16583	1.2968e-07	0.11924	9.6419e-11
39.734	0.0024444	0.00095862	39.734	0.0072091	0.001297	23.84	0.00087271	0.0009241					0.16392	5.7282e-05	0.16739	1.3284e-07	0.12046	1.0025e-10
40.352	0.0029542	0.0010392	40.352	0.007086	0.0014528	24.211	0.0013283	0.00078843					0.16545	5.7919e-05	0.16898	1.3608e-07	0.1217	1.0424e-10
40.98	0.0026236	0.0011963	40.98	0.0071947	0.00083945	24.588	0.0019573	0.00068263					0.167	5.8563e-05	0.17057	1.394e-07	0.12294	1.0839e-10
41.617	0.0028314	0.0011145	41.617	0.0068057	0.001178	24.97	0.0018457	0.0005442					0.16856	5.9214e-05	0.17219	1.428e-07	0.1242	1.1269e-10
42.264	0.0020906	0.0014209	42.264	0.0068779	0.001095	25.358	0.0019725	0.00070751					0.17014	5.9872e-05	0.17382	1.4628e-07	0.12548	1.1717e-10
42.921	0.0023535	0.0013203	42.921	0.0073461	0.0012049	25.753	0.0018822	0.0010215					0.17174	6.0538e-05	0.17546	1.4985e-07	0.12676	1.2182e-10
43.587	0.0026433	0.0011889	43.587	0.0069296	0.00082258	26.153	0.0018733	0.00079771					0.17334	6.1211e-05	0.17712	1.535e-07	0.12806	1.2666e-10
44.264	0.0021421	0.00079987	44.264	0.0068861	0.00098186	26.559	0.0018223	0.0013351					0.17497	6.1891e-05	0.17879	1.5724e-07	0.12937	1.3169e-10
44.951	0.0023473	0.00072444	44.951	0.0071431	0.00087675	26.971	0.0015147	0.00062374					0.17661	6.2579e-05	0.18048	1.6108e-07	0.1307	1.3691e-10
45.648	0.0023733	0.0011532	45.648	0.0067749	0.00090939	27.389	0.001869	0.00086595					0.17826	6.3274e-05	0.18219	1.65e-07	0.13204	1.4234e-10
46.356	0.0021226	0.001202	46.356	0.0066792	0.0010973	27.814	0.0016627	0.00093161					0.17993	6.3977e-05	0.18391	1.6903e-07	0.13339	1.4798e-10
47.074	0.0023232	0.0010107	47.074	0.0067998	0.0012925	28.245	0.0019362	0.0010403					0.18161	6.4688e-05	0.18565	1.7314e-07	0.13476	1.5385e-10
47.804	0.0023008	0.001182	47.804	0.0067298	0.0013119	28.682	0.0019738	0.00066969					0.18331	6.5406e-05	0.18741	1.7736e-07	0.13614	1.5994e-10
48.544	0.0021589	0.00098198	48.544	0.0067411	0.0011129	29.126	0.001852	0.00096958					0.18503	6.6133e-05	0.18918	1.8168e-07	0.13754	1.6628e-10
49.295	0.0018905	0.00085961	49.295	0.006611	0.00080745	29.577	0.0021647	0.00062791					0.18676	6.6867e-05	0.19097	1.8611e-07	0.13895	1.7286e-10
50.058	0.0016414	0.00090309	50.058	0.0065847	0.0010515	30.035	0.0022954	0.0010176					0.18851	6.761e-05	0.19277	1.9065e-07	0.14037	1.797e-10
50.833	0.0016418	0.00092547	50.833	0.0065117	0.0013696	30.5	0.0022922	0.00066344					0.19028	6.836e-05	0.19459	1.9529e-07	0.14181	1.868e-10
51.619	0.0018019	0.00074435	51.619	0.0062659	0.0011842	30.971	0.0024984	0.00092963					0.19206	6.9119e-05	0.19643	2.0005e-07	0.14326	1.9419e-10
52.416	0.0014843	0.0013659	52.416	0.0064852	0.0010911	31.45	0.002541	0.00077915					0.19386	6.9886e-05	0.19829	2.0492e-07	0.14473	2.0186e-10
53.226	0.0012294	0.00098346	53.226	0.0063448	0.0013109	31.936	0.0024891	0.00071316					0.19567	7.0662e-05	0.20017	2.0991e-07	0.14621	2.0984e-10
54.049	0.0017132	0.0010757	54.049	0.0064055	0.0011466	32.429	0.0027508	0.00092814					0.1975	7.1446e-05	0.20206	2.1502e-07	0.14771	2.1813e-10
54.883	0.001541	0.00082153	54.883	0.0064631	0.00099503	32.93	0.0027353	0.00067732					0.19935	7.2239e-05	0.20397	2.2026e-07	0.14922	2.2674e-10
55.73	0.0014684	0.0012815	55.73	0.006097	0.00092828	33.438	0.0025501	0.00055269					0.20122	7.3041e-05	0.2059	2.2562e-07	0.15075	2.3568e-10
56.59	0.0014975	0.001033	56.59	0.0060419	0.0010168	33.954	0.0026611	0.0008363					0.2031	7.3851e-05	0.20784	2.3111e-07	0.1523	2.4498e-10
57.463	0.0013036	0.0010497	57.463	0.0061944	0.00057788	34.478	0.0028389	0.00053702					0.20501	7.4671e-05	0.20981	2.3674e-07	0.15386	2.5464e-10
58.349	0.0013969	0.0010483	58.349	0.0059309	0.00086621	35.009	0.003079	0.0010183					0.20692	7.5499e-05	0.21179	2.425e-07	0.15544	2.6467e-10
59.248	0.0013395	0.0010727	59.248	0.0061276	0.00085939	35.549	0.0031289	0.00095665					0.20886	7.6336e-05	0.2138	2.484e-07	0.15703	2.751e-10
60.161	0.001181	0.00085249	60.161	0.0058694	0.00082282	36.097	0.0031641	0.00081019					0.21082	7.7183e-05	0.21582	2.5445e-07	0.15864	2.8593e-10
61.088	0.0010325	0.00066679	61.088	0.0057947	0.00099591	36.653	0.003368	0.00041745					0.21279	7.8039e-05	0.21786	2.6064e-07	0.16026	2.9718e-10
62.029	0.0011616	0.00047327	62.029	0.0055826	0.00089168	37.217	0.0034109	0.00096471					0.21478	7.8904e-05	0.21992	2.6698e-07	0.16191	3.0888e-10
62.984	0.0011406	0.00091751	62.984	0.0056424	0.0012286	37.79	0.0030562	0.00069774					0.2168	7.9779e-05	0.222	2.7347e-07	0.16357	3.2102e-10
63.953	0.00087598	0.00087722	63.953	0.005362	0.0011549	38.372	0.0032788	0.00064352					0.21883	8.0663e-05	0.22409	2.8013e-07	0.16524	3.3364e-10
64.937	0.0008557	0.0011451	64.937	0.0056548	0.00075729	38.962	0.003599	0.0012841					0.22087	8.1557e-05	0.22621	2.8694e-07	0.16694	3.4675e-10
65.936	0.00086963	0.0011317	65.936	0.0053536	0.00075985	39.562	0.0033058	0.00093936					0.22294	8.2461e-05	0.22835	2.9392e-07	0.16865	3.6037e-10
66.95	0.0006718	0.0010932	66.95	0.0053328	0.000571	40.17	0.003877	0.0006038					0.22503	8.3375e-05	0.23051	3.0107e-07	0.17037	3.7451e-10
67.979	0.00098153	0.0007785	67.979	0.0050871	0.00086632	40.788	0.0035971	0.00068485					0.22714	8.4299e-05	0.23269	3.0839e-07	0.17212	3.8921e-10
69.024	0.00039563	0.0010832	69.024	0.0049479	0.00091681	41.415	0.0039765	0.00068917					0.22926	8.5233e-05	0.23489	3.1589e-07	0.17388	4.0447e-10
70.085	0.000626	0.00084979	70.085	0.0047321	0.00078018	42.051	0.003459	0.0010356					0.23141	8.6177e-05	0.23711	3.2357e-07	0.17567	4.2033e-10
71.161	0.00070218	0.0011152	71.161	0.0049113	0.00069744	42.697	0.003348	0.00062135					0.23358	8.7131e-05	0.23935	3.3143e-07	0.17747	4.368e-10
72.254	0.00054212	0.0010253	72.254	0.0047527	0.00090155	43.352	0.0036411	0.00083616					0.23576	8.8096e-05	0.24162	3.3949e-07	0.17929	4.5391e-10
73.363	0.00022254	0.0009187	73.363	0.0044267	0.00077915	44.018	0.0039329	0.00074513					0.23797	8.9072e-05	0.2439	3.4774e-07	0.18112	4.7168e-10
74.489	0.00014543	0.0010617	74.489	0.0048758	0.00072082	44.694	0.0040225	0.00042686					0.2402	9.0058e-05	0.24621	3.5619e-07	0.18298	4.9013e-10
75.632	0.00025571	0.00081491	75.632	0.004404	0.00080389	45.379	0.003769	0.0004781					0.24245	9.1055e-05	0.24853	3.6485e-07	0.18485	5.093e-10
76.793	0.00035401	0.0010016	76.793	0.0039759	0.00069045	46.076	0.0042194	0.00057155					0.24472	9.2063e-05	0.25088	3.7371e-07	0.18675	5.2921e-10
77.97	3.0492e-06	0.0011428	77.97	0.0040203	0.0006463	46.782	0.003761	0.00053194					0.24701	9.3082e-05	0.25326	3.8279e-07	0.18866	5.4989e-10
79.166	0.00028789	0.0010283	79.166	0.0039699	0.0010089	47.5	0.0043938	0.00047702					0.24932	9.4112e-05	0.25565	3.9209e-07	0.1906	5.7136e-10
80.379	0.00027212	0.0010073	80.379	0.0038252	0.00084535	48.228	0.003983	0.00065257					0.25166	9.5153e-05	0.25807	4.0161e-07	0.19255	5.9367e-10
81.611	0.0001608	0.001084	81.611	0.003841	0.00097322	48.967	0.0040254	0.0011378					0.25401	9.6206e-05	0.26051	4.1137e-07	0.19452	6.1683e-10
82.862	-7.9367e-05	0.0010358	82.862	0.0039178	0.00072886	49.717	0.0038259	0.00057553					0.25639	9.727e-05	0.26297	4.2135e-07	0.19652	6.4088e-10
84.131	-3.6077e-06	0.0014185	84.131	0.0034379	0.00063867	50.479	0.0047421	0.00054215					0.25879	9.8346e-05	0.26546	4.3158e-07	0.19853	6.6586e-10
85.42	7.2016e-05	0.0010839	85.42	0.0034531	0.00095248	51.252	0.0041804	0.00084941					0.26122	9.9433e-05	0.26797	4.4206e-07	0.20056	6.918e-10
86.728	0.00012689	0.0014751	86.728	0.0034476	0.0008257	52.037	0.0043446	0.00049721					0.26366	0.00010053	0.2705	4.5279e-07	0.20262	7.1874e-10
88.055	1.4399e-06	0.00097979	88.055	0.0031752	0.00089152	52.833	0.0046127	0.00050876					0.26613	0.00010164	0.27306	4.6378e-07	0.2047	7.467e-10
89.403	-0.00013271	0.0010104	89.403	0.0031821	0.0010675	53.642	0.0045784	0.00083644					0.26862	0.00010277	0.27564	4.7504e-07	0.20679	7.7575e-10
90.771	-0.00016801	0.0011911	90.771	0.003193	0.00097282	54.463	0.0045015	0.00057771					0.27114	0.0001039	0.27825	4.8657e-07	0.20891	8.0591e-10
92.16	-9.8707e-05	0.0010505	92.16	0.0031817	0.00083626	55.296	0.0043888	0.00044537					0.27368	0.00010505	0.28088	4.9837e-07	0.21105	8.3722e-10
93.57	-0.00046212	0.00083735	93.57	0.0029433	0.00084142	56.142	0.0044969	0.00022609					0.27624	0.00010621	0.28353	5.1046e-07	0.21322	8.6973e-10
95.001	-0.00023612	0.000934	95.001	0.0025544	0.00076949	57	0.0045374	0.00078817					0.27883	0.00010739	0.28621	5.2285e-07	0.2154	9.0349e-10
96.453	-5.9088e-05	0.00074061	96.453	0.0028397	0.00053925	57.872	0.0042776	0.00034977					0.28144	0.00010857	0.28892	5.3553e-07	0.21761	9.3854e-10
97.928	-0.00049956	0.00085563	97.928	0.0028028	0.00080591	58.757	0.0041926	0.00031907					0.28407	0.00010977	0.29165	5.4851e-07	0.21984	9.7493e-10
99.424	-0.00025644	0.00099172	99.424	0.0027404	0.00074777	59.655	0.0043246	0.00088125					0.28673	0.00011098	0.29441	5.6181e-07	0.22209	1.0127e-09
100.94	-0.00039951	0.00099556	100.94	0.0026087	0.00066547	60.566	0.0041996	0.0006602					0.28942	0.00011221	0.29719	5.7544e-07	0.22437	1.0519e-09
102.49	-0.0002673	0.0011256	102.49	0.0022624	0.0010464	61.492	0.0042282	0.00080985					0.29213	0.00011345	0.3	5.8939e-07	0.22667	1.0926e-09
104.05	-6.6313e-05	0.001088	104.05	0.0024749	0.00087419	62.431	0.0041921	0.00069317					0.29486	0.0001147	0.30284	6.0367e-07	0.22899	1.1349e-09
105.64	-0.00026225	0.00093813	105.64	0.0024145	0.00064278	63.384	0.0041461	0.00060043					0.29762	0.00011596	0.3057	6.183e-07	0.23134	1.1788e-09
107.25	-0.00075614	0.0010424	107.25	0.0021539	0.00068232	64.352	0.0042812	0.00022844					0.30041	0.00011724	0.30859	6.3328e-07	0.23371	1.2243e-09
108.89	-0.00037814	0.0010491	108.89	0.0019429	0.00066887	65.335	0.0043204	0.0008002					0.30322	0.00011854	0.31151	6.4863e-07	0.2361	1.2716e-09
110.55	-0.00039765	0.00098178	110.55	0.0020989	0.00057961	66.332	0.0043377	0.00071118					0.30606	0.00011985	0.31445	6.6434e-07	0.23852	1.3207e-09
112.24	-0.00055273	0.0011582	112.24	0.0020633	0.00076669	67.344	0.0043343	0.00072991					0.30893	0.00012117	0.31743	6.8043e-07	0.24097	1.3717e-09
113.95	-0.00045879	0.00097297	113.95	0.0020041	0.00063686	68.372	0.0041893	0.00064144					0.31182	0.0001225	0.32043	6.9691e-07	0.24344	1.4245e-09
115.69	-0.00056343	0.00099848	115.69	0.0018042	0.00068584	69.415	0.0039418	0.00058849					0.31474	0.00012385	0.32346	7.1379e-07	0.24593	1.4794e-09
117.46	-0.00030959	0.00098695	117.46	0.0018177	0.00079983	70.474	0.004325	0.00092058					0.31769	0.00012522	0.32652	7.3107e-07	0.24845	1.5364e-09
119.25	-0.00049079	0.00065323	119.25	0.0015914	0.00068529	71.549	0.0041435	0.00077441					0.32066	0.0001266	0.3296	7.4877e-07	0.251	1.5955e-09
121.07	-0.00037365	0.00090835	121.07	0.0016489	0.00079727	72.64	0.0044258	0.00057157					0.32366	0.00012799	0.33272	7.6689e-07	0.25357	1.6569e-09
122.91	-0.00034264	0.0010632	122.91	0.0017119	0.00072035	73.748	0.0041827	0.00068173					0.32669	0.0001294	0.33587	7.8545e-07	0.25617	1.7206e-09
124.79	-0.00042559	0.0010266	124.79	0.0014564	0.00076584	74.872	0.0041372	0.00068393					0.32975	0.00013083	0.33904	8.0446e-07	0.25879	1.7867e-09
126.69	-0.0005762	0.0010711	126.69	0.0014441	0.0006201	76.013	0.0040463	0.00062574					0.33284	0.00013227	0.34225	8.2393e-07	0.26144	1.8553e-09
128.62	-0.0004505	0.0011082	128.62	0.0011732	0.000632	77.172	0.0042789	0.00058311					0.33596	0.00013373	0.34548	8.4386e-07	0.26412	1.9265e-09
130.58	-0.00047115	0.0011196	130.58	0.0012711	0.00096853	78.348	0.0040477	0.00071957					0.3391	0.0001352	0.34875	8.6427e-07	0.26683	2.0003e-09
132.57	-0.00057724	0.0012424	132.57	0.0011998	0.00050459	79.541	0.004036	0.0008439					0.34228	0.00013669	0.35205	8.8517e-07	0.26957	2.077e-09
134.59	-0.00052092	0.0010688	134.59	0.001166	0.00059555	80.753	0.0037947	0.00072096					0.34548	0.00013819	0.35537	9.0657e-07	0.27233	2.1565e-09
136.64	-0.00056585	0.0011725	136.64	0.0010965	0.00057509	81.983	0.0039146	0.00060254					0.34872	0.00013971	0.35873	9.2849e-07	0.27512	2.239e-09
138.72	-0.00066765	0.00084318	138.72	0.00080245	0.00072177	83.231	0.0037841	0.00067154					0.35198	0.00014125	0.36213	9.5093e-07	0.27794	2.3247e-09
140.83	-0.00069198	0.0014038	140.83	0.00098916	0.00058002	84.499	0.0036526	0.00089085					0.35528	0.0001428	0.36555	9.7392e-07	0.28079	2.4135e-09
142.98	-0.00038753	0.0011817	142.98	0.00093062	0.00066896	85.785	0.0039366	0.00055745					0.35861	0.00014437	0.36901	9.9745e-07	0.28366	2.5057e-09
145.15	-0.00099024	0.0010003	145.15	0.0009415	0.00061498	87.091	0.0037152	0.00086713					0.36196	0.00014596	0.37249	1.0216e-06	0.28657	2.6014e-09
147.36	-0.00078146	0.00075312	147.36	0.0008189	0.00065154	88.417	0.0037412	0.00076072					0.36535	0.00014757	0.37602	1.0462e-06	0.28951	2.7006e-09
149.6	-0.00076419	0.00086768	149.6	0.00081605	0.0005237	89.763	0.0037574	0.00083092					0.36877	0.00014919	0.37957	1.0715e-06	0.29247	2.8036e-09
151.88	-0.000699	0.00099957	151.88	0.00076405	0.00053462	91.129	0.0035835	0.00081848					0.37223	0.00015083	0.38316	1.0974e-06	0.29547	2.9104e-09
154.19	-0.00073985	0.00088053	154.19	0.00078891	0.00066094	92.515	0.0035908	0.00082766					0.37571	0.00015248	0.38678	1.1239e-06	0.2985	3.0212e-09
156.54	-0.00080995	0.0010512	156.54	0.00070851	0.00052242	93.923	0.0035266	0.0008137					0.37923	0.00015416	0.39044	1.151e-06	0.30156	3.1361e-09
158.92	-0.00078291	0.0009815	158.92	0.00055539	0.0006648	95.351	0.0032515	0.00081735					0.38278	0.00015585	0.39413	1.1788e-06	0.30465	3.2554e-09
161.34	-0.0010361	0.00098114	161.34	0.00050979	0.00078321	96.802	0.003277	0.00089864					0.38636	0.00015756	0.39786	1.2072e-06	0.30777	3.3791e-09
163.79	-0.0010827	0.00089688	163.79	0.00053631	0.00077361	98.274	0.0030249	0.0008479					0.38998	0.00015929	0.40162	1.2364e-06	0.31092	3.5074e-09
166.28	-0.0010789	0.00091412	166.28	0.00030807	0.00071035	99.768	0.0033668	0.00068976					0.39363	0.00016104	0.40542	1.2662e-06	0.31411	3.6404e-09
168.81	-0.00099888	0.0012579	168.81	0.00040592	0.00059951	101.29	0.0032114	0.00080914					0.39732	0.00016281	0.40925	1.2967e-06	0.31733	3.7785e-09
171.37	-0.00094896	0.001144	171.37	0.00047617	0.00073638	102.82	0.0029751	0.0010128					0.40104	0.00016459	0.41312	1.328e-06	0.32058	3.9216e-09
173.98	-0.001076	0.0010672	173.98	0.00040343	0.00079666	104.39	0.002801	0.00077308					0.40479	0.0001664	0.41702	1.36e-06	0.32387	4.0701e-09
176.63	-0.001106	0.0012506	176.63	0.00031665	0.0006678	105.97	0.0027885	0.00086727					0.40858	0.00016822	0.42097	1.3928e-06	0.32719	4.2241e-09
179.31	-0.0010032	0.0011608	179.31	0.00019977	0.00077588	107.59	0.0027836	0.00049807					0.41241	0.00017007	0.42495	1.4264e-06	0.33054	4.3839e-09
182.03	-0.0010591	0.0011882	182.03	0.00024259	0.0007452	109.22	0.0025579	0.00090487					0.41627	0.00017193	0.42897	1.4608e-06	0.33393	4.5495e-09
184.8	-0.0011066	0.0012055	184.8	9.3456e-05	0.00071849	110.88	0.0029363	0.00088549					0.42017	0.00017382	0.43302	1.4959e-06	0.33735	4.7213e-09
187.61	-0.00094116	0.0012668	187.61	0.00056586	0.00045503	112.57	0.0024904	0.00085729					0.4241	0.00017572	0.43712	1.532e-06	0.34081	4.8994e-09
190.46	-0.0010572	0.0012564	190.46	0.00011778	0.00070424	114.28	0.0025957	0.0010293					0.42807	0.00017765	0.44125	1.5689e-06	0.3443	5.0841e-09
193.35	-0.0011309	0.0011826	193.35	0.00030828	0.00067911	116.01	0.0025788	0.00094422					0.43208	0.00017959	0.44542	1.6067e-06	0.34783	5.2756e-09
196.29	-0.001048	0.0012206	196.29	3.0872e-05	0.0007438	117.77	0.002586	0.0011857					0.43613	0.00018156	0.44963	1.6453e-06	0.35139	5.4742e-09
199.27	-0.0011495	0.0011349	199.27	9.0303e-05	0.00049763	119.56	0.0023301	0.0010055					0.44021	0.00018354	0.45388	1.685e-06	0.35499	5.6802e-09
202.29	-0.00089878	0.0011279	202.29	-4.9127e-05	0.00068272	121.38	0.0022526	0.0008536					0.44433	0.00018555	0.45817	1.7255e-06	0.35863	5.8937e-09
205.37	-0.0011867	0.0011089	205.37	0.00017715	0.00056033	123.22	0.0022694	0.00077944					0.44849	0.00018758	0.46251	1.767e-06	0.36231	6.1151e-09
208.49	-0.001118	0.0012733	208.49	-6.7273e-05	0.00039878	125.09	0.0023752	0.00088231					0.45269	0.00018964	0.46688	1.8095e-06	0.36602	6.3446e-09
			211.65	0.00017244	0.00075568	126.99	0.0022739	0.00095433					0.45693	0.00019171	0.47129	1.853e-06	0.36977	6.5826e-09
			214.86	8.0518e-05	0.00077612	128.92	0.0022719	0.0010187					0.46121	0.0001938	0.47575	1.8976e-06	0.37356	6.8293e-09
			218.12	0.00013092	0.00081316	130.88	0.0022041	0.0011781					0.46553	0.00019592	0.48025	1.9432e-06	0.37739	7.085e-09
			221.43	0.00025389	0.00074332	132.86	0.0020459	0.0010387					0.46989	0.00019806	0.48479	1.9899e-06	0.38125	7.3501e-09
			224.8	0.0001333	0.00078815	134.88	0.0019549	0.0011741					0.47429	0.00020023	0.48937	2.0378e-06	0.38516	7.625e-09
			228.21	2.1641e-05	0.00063446	136.92	0.0019695	0.001086					0.47873	0.00020242	0.494	2.0867e-06	0.38911	7.9099e-09
						139	0.0017073	0.00098844					0.48321	0.00020463	0.49867	2.1369e-06	0.3931	8.2052e-09
						141.11	0.0016947	0.0011913					0.48774	0.00020686	0.50338	2.1882e-06	0.39713	8.5113e-09
						143.25	0.001897	0.0010458					0.4923	0.00020912	0.50814	2.2407e-06	0.40119	8.8285e-09
						145.43	0.0017372	0.00082638					0.49691	0.0002114	0.51295	2.2945e-06	0.40531	9.1573e-09
						147.63	0.001608	0.0011581					0.50157	0.0002137	0.5178	2.3496e-06	0.40946	9.4981e-09
						149.87	0.0016623	0.0011183					0.50626	0.00021603	0.52269	2.4059e-06	0.41366	9.8513e-09
						152.14	0.0015023	0.0010279					0.511	0.00021839	0.52763	2.4637e-06	0.4179	1.0217e-08
						154.45	0.0015417	0.0013456					0.51579	0.00022077	0.53262	2.5228e-06	0.42218	1.0597e-08
						156.79	0.0013987	0.0012205					0.52062	0.00022317	0.53766	2.5832e-06	0.4265	1.099e-08
						159.17	0.0013897	0.001255					0.52549	0.00022561	0.54274	2.6452e-06	0.43087	1.1397e-08
						161.58	0.0014622	0.0012514					0.53041	0.00022806	0.54787	2.7086e-06	0.43529	1.1819e-08
						164.03	0.0013487	0.0012679					0.53538	0.00023054	0.55305	2.7735e-06	0.43975	1.2256e-08
						166.52	0.0013514	0.0010013					0.54039	0.00023305	0.55828	2.8399e-06	0.44426	1.271e-08
						169.04	0.0014995	0.0011605					0.54545	0.00023559	0.56356	2.9079e-06	0.44881	1.3179e-08
						171.61	0.0012375	0.0010981					0.55056	0.00023815	0.56889	2.9775e-06	0.45341	1.3666e-08
						174.21	0.0013792	0.001201					0.55571	0.00024074	0.57427	3.0488e-06	0.45806	1.417e-08
						176.85	0.0010952	0.0011404					0.56092	0.00024336	0.5797	3.1218e-06	0.46275	1.4692e-08
						179.53	0.0011367	0.001192					0.56617	0.000246	0.58518	3.1965e-06	0.46749	1.5233e-08
						182.25	0.0012161	0.00097456					0.57147	0.00024868	0.59071	3.2729e-06	0.47228	1.5793e-08
						185.01	0.0011593	0.0011343					0.57682	0.00025137	0.59629	3.3512e-06	0.47712	1.6374e-08
						187.82	0.0008451	0.0012377					0.58222	0.0002541	0.60193	3.4313e-06	0.48201	1.6975e-08
						190.66	0.0010207	0.0011779					0.58767	0.00025686	0.60762	3.5134e-06	0.48695	1.7598e-08
						193.55	0.0010694	0.0011294					0.59317	0.00025965	0.61337	3.5973e-06	0.49194	1.8243e-08
						196.48	0.00094018	0.0013265					0.59873	0.00026247	0.61917	3.6833e-06	0.49698	1.8911e-08
						199.46	0.0010417	0.0013781					0.60434	0.00026531	0.62502	3.7712e-06	0.50208	1.9603e-08
						202.48	0.0010021	0.001047					0.60999	0.00026819	0.63093	3.8613e-06	0.50722	2.032e-08
						205.55	0.0010119	0.0011529					0.61571	0.00027109	0.6369	3.9534e-06	0.51242	2.1063e-08
						208.66	0.0010044	0.0013258					0.62147	0.00027403	0.64292	4.0478e-06	0.51767	2.1831e-08
						211.82	0.00088943	0.001185					0.62729	0.000277	0.649	4.1443e-06	0.52298	2.2628e-08
						215.03	0.0011088	0.0011584					0.63316	0.00028	0.65513	4.2432e-06	0.52834	2.3452e-08
						218.29	0.00091304	0.0010631					0.63909	0.00028303	0.66133	4.3443e-06	0.53375	2.4306e-08
						221.59	0.00097644	0.0011708					0.64508	0.00028609	0.66758	4.4479e-06	0.53922	2.519e-08
						224.95	0.0010412	0.001207					0.65112	0.00028918	0.67389	4.5539e-06	0.54475	2.6105e-08
						228.35	0.00083004	0.0010491					0.65721	0.00029231	0.68026	4.6624e-06	0.55033	2.7053e-08
						231.81	0.00093234	0.0010181					0.66337	0.00029546	0.68669	4.7734e-06	0.55597	2.8034e-08
						235.32	0.00081211	0.0011753					0.66958	0.00029866	0.69319	4.887e-06	0.56167	2.905e-08
						238.88	0.0006828	0.0010639					0.67585	0.00030188	0.69974	5.0034e-06	0.56742	3.0102e-08
						242.5	0.00078713	0.0011781					0.68217	0.00030514	0.70636	5.1224e-06	0.57324	3.1191e-08
						246.17	0.00077542	0.0011802					0.68856	0.00030843	0.71303	5.2443e-06	0.57911	3.2318e-08
						249.9	0.00067381	0.0013229					0.69501	0.00031176	0.71978	5.369e-06	0.58505	3.3485e-08
						253.68	0.00075156	0.0012483					0.70152	0.00031512	0.72658	5.4966e-06	0.59104	3.4693e-08
						257.52	0.00065881	0.0012153					0.70809	0.00031852	0.73345	5.6272e-06	0.5971	3.5944e-08
						261.42	0.00063704	0.0012207					0.71472	0.00032195	0.74039	5.7609e-06	0.60322	3.7238e-08
						265.37	0.00071286	0.00094488					0.72141	0.00032541	0.74739	5.8977e-06	0.6094	3.8578e-08
						269.39	0.00038966	0.0010746					0.72816	0.00032892	0.75445	6.0377e-06	0.61565	3.9964e-08
						273.46	0.00056501	0.0010809					0.73498	0.00033246	0.76158	6.181e-06	0.62195	4.1399e-08
						277.6	0.00054318	0.001181					0.74186	0.00033603	0.76879	6.3277e-06	0.62833	4.2885e-08
						281.8	0.00064937	0.0010009					0.74881	0.00033965	0.77605	6.4778e-06	0.63477	4.4422e-08
						286.07	0.00059006	0.0011209					0.75582	0.0003433	0.78339	6.6313e-06	0.64127	4.6012e-08
						290.4	0.00054049	0.001311					0.7629	0.00034698	0.7908	6.7885e-06	0.64784	4.7658e-08
						294.79	0.00044528	0.0014288					0.77004	0.00035071	0.79827	6.9493e-06	0.65448	4.9361e-08
						300	0.00072606	0.0013166					0.77725	0.00035447	0.80582	7.1139e-06	0.66119	5.1124e-08
													0.78453	0.00035828	0.81344	7.2824e-06	0.66797	5.2947e-08
													0.79187	0.00036212	0.82113	7.4548e-06	0.67481	5.4834e-08
													0.79929	0.000366	0.82889	7.6311e-06	0.68173	5.6787e-08
													0.80677	0.00036992	0.83673	7.8116e-06	0.68871	5.8806e-08
													0.81433	0.00037389	0.84464	7.9963e-06	0.69577	6.0896e-08
													0.82195	0.00037789	0.85263	8.1853e-06	0.7029	6.3058e-08
													0.82965	0.00038193	0.86069	8.3787e-06	0.71011	6.5294e-08
													0.83742	0.00038602	0.86883	8.5766e-06	0.71738	6.7608e-08
													0.84526	0.00039015	0.87704	8.7791e-06	0.72473	7.0001e-08
													0.85317	0.00039431	0.88533	8.9862e-06	0.73216	7.2476e-08
													0.86116	0.00039853	0.8937	9.1982e-06	0.73966	7.5037e-08
													0.86922	0.00040278	0.90215	9.4151e-06	0.74724	7.7685e-08
													0.87736	0.00040708	0.91068	9.6371e-06	0.7549	8.0424e-08
													0.88558	0.00041142	0.91929	9.8642e-06	0.76264	8.3257e-08
													0.89387	0.00041581	0.92799	1.0096e-05	0.77045	8.6187e-08
													0.90224	0.00042024	0.93676	1.0334e-05	0.77835	8.9217e-08
													0.91069	0.00042471	0.94562	1.0577e-05	0.78633	9.2351e-08
													0.91921	0.00042924	0.95456	1.0826e-05	0.79438	9.5591e-08
													0.92782	0.0004338	0.96358	1.1081e-05	0.80253	9.8942e-08
													0.93651	0.00043842	0.97269	1.1341e-05	0.81075	1.0241e-07
													0.94528	0.00044307	0.98189	1.1608e-05	0.81906	1.0599e-07
													0.95413	0.00044778	0.99117	1.188e-05	0.82745	1.0969e-07
													0.96306	0.00045254	1.0005	1.2159e-05	0.83593	1.1352e-07
													0.97208	0.00045734	1.01	1.2445e-05	0.8445	1.1748e-07
													0.98118	0.00046219	1.0196	1.2736e-05	0.85315	1.2158e-07
													0.99037	0.00046709	1.0292	1.3035e-05	0.8619	1.2581e-07
													0.99964	0.00047204	1.0389	1.3341e-05	0.87073	1.3019e-07
													1.009	0.00047704	1.0487	1.3653e-05	0.87965	1.3471e-07
													1.0184	0.00048208	1.0587	1.3973e-05	0.88867	1.3938e-07
													1.028	0.00048718	1.0687	1.43e-05	0.89777	1.4422e-07
													1.0376	0.00049233	1.0788	1.4634e-05	0.90697	1.4921e-07
													1.0473	0.00049753	1.089	1.4976e-05	0.91627	1.5438e-07
													1.0571	0.00050279	1.0993	1.5326e-05	0.92566	1.5971e-07
													1.067	0.00050809	1.1097	1.5684e-05	0.93514	1.6523e-07
													1.077	0.00051345	1.1202	1.605e-05	0.94473	1.7093e-07
													1.0871	0.00051886	1.1307	1.6425e-05	0.95441	1.7682e-07
													1.0973	0.00052433	1.1414	1.6808e-05	0.96419	1.8291e-07
													1.1076	0.00052985	1.1522	1.72e-05	0.97407	1.892e-07
													1.1179	0.00053542	1.1631	1.7601e-05	0.98405	1.957e-07
													1.1284	0.00054105	1.1741	1.8011e-05	0.99414	2.0242e-07
													1.139	0.00054674	1.1852	1.843e-05	1.0043	2.0936e-07
													1.1496	0.00055248	1.1964	1.8859e-05	1.0146	2.1653e-07
													1.1604	0.00055827	1.2077	1.9297e-05	1.025	2.2394e-07
													1.1713	0.00056413	1.2192	1.9746e-05	1.0355	2.316e-07
													1.1822	0.00057004	1.2307	2.0204e-05	1.0461	2.3951e-07
													1.1933	0.00057601	1.2423	2.0674e-05	1.0569	2.4769e-07
													1.2045	0.00058204	1.2541	2.1153e-05	1.0677	2.5613e-07
													1.2157	0.00058813	1.2659	2.1644e-05	1.0786	2.6485e-07
													1.2271	0.00059427	1.2779	2.2145e-05	1.0897	2.7386e-07
													1.2386	0.00060048	1.29	2.2658e-05	1.1008	2.8317e-07
													1.2502	0.00060675	1.3022	2.3183e-05	1.1121	2.9279e-07
													1.2619	0.00061308	1.3145	2.372e-05	1.1235	3.0272e-07
													1.2737	0.00061947	1.3269	2.4268e-05	1.135	3.1298e-07
													1.2857	0.00062592	1.3395	2.4829e-05	1.1467	3.2357e-07
													1.2977	0.00063243	1.3521	2.5403e-05	1.1584	3.3451e-07
													1.3099	0.00063901	1.3649	2.5989e-05	1.1703	3.4581e-07
													1.3221	0.00064565	1.3778	2.6589e-05	1.1823	3.5749e-07
													1.3345	0.00065236	1.3908	2.7202e-05	1.1944	3.6954e-07
													1.347	0.00065912	1.404	2.7829e-05	1.2066	3.8199e-07
													1.3596	0.00066596	1.4173	2.847e-05	1.219	3.9484e-07
													1.3723	0.00067286	1.4307	2.9125e-05	1.2315	4.0812e-07
													1.3852	0.00067983	1.4442	2.9795e-05	1.2441	4.2182e-07
													1.3982	0.00068686	1.4578	3.048e-05	1.2569	4.3597e-07
													1.4112	0.00069396	1.4716	3.1181e-05	1.2698	4.5059e-07
													1.4245	0.00070112	1.4855	3.1896e-05	1.2828	4.6567e-07
													1.4378	0.00070836	1.4996	3.2628e-05	1.2959	4.8125e-07
													1.4513	0.00071566	1.5138	3.3377e-05	1.3092	4.9734e-07
													1.4648	0.00072304	1.5281	3.4141e-05	1.3226	5.1394e-07
													1.4786	0.00073048	1.5425	3.4923e-05	1.3362	5.3108e-07
													1.4924	0.00073799	1.5571	3.5723e-05	1.3499	5.4878e-07
													1.5064	0.00074558	1.5718	3.654e-05	1.3637	5.6704e-07
													1.5205	0.00075323	1.5867	3.7375e-05	1.3777	5.859e-07
													1.5347	0.00076096	1.6017	3.8228e-05	1.3918	6.0536e-07
													1.5491	0.00076876	1.6168	3.9101e-05	1.406	6.2546e-07
													1.5636	0.00077663	1.6321	3.9993e-05	1.4205	6.4619e-07
													1.5782	0.00078458	1.6475	4.0904e-05	1.435	6.676e-07
													1.593	0.0007926	1.6631	4.1836e-05	1.4497	6.8969e-07
													1.6079	0.0008007	1.6788	4.2788e-05	1.4646	7.1249e-07
													1.623	0.00080887	1.6947	4.3761e-05	1.4796	7.3602e-07
													1.6382	0.00081711	1.7107	4.4756e-05	1.4947	7.6031e-07
													1.6535	0.00082543	1.7269	4.5772e-05	1.5101	7.8537e-07
													1.669	0.00083383	1.7432	4.6811e-05	1.5255	8.1123e-07
													1.6846	0.00084231	1.7597	4.7872e-05	1.5412	8.3792e-07
													1.7004	0.00085086	1.7764	4.8957e-05	1.557	8.6546e-07
													1.7163	0.0008595	1.7932	5.0065e-05	1.5729	8.9387e-07
													1.7324	0.00086821	1.8101	5.1198e-05	1.589	9.232e-07
													1.7486	0.000877	1.8272	5.2355e-05	1.6053	9.5345e-07
													1.765	0.00088587	1.8445	5.3538e-05	1.6218	9.8467e-07
													1.7815	0.00089482	1.8619	5.4746e-05	1.6384	1.0169e-06
													1.7982	0.00090385	1.8795	5.5981e-05	1.6552	1.0501e-06
													1.815	0.00091297	1.8973	5.7243e-05	1.6721	1.0844e-06
													1.832	0.00092216	1.9153	5.8531e-05	1.6893	1.1197e-06
													1.8492	0.00093144	1.9334	5.9848e-05	1.7066	1.1562e-06
													1.8665	0.0009408	1.9516	6.1193e-05	1.7241	1.1939e-06
													1.884	0.00095025	1.9701	6.2568e-05	1.7418	1.2327e-06
													1.9016	0.00095978	1.9887	6.3972e-05	1.7596	1.2727e-06
													1.9194	0.00096939	2.0075	6.5406e-05	1.7776	1.314e-06
													1.9374	0.0009791	2.0265	6.6871e-05	1.7958	1.3567e-06
													1.9555	0.00098888	2.0457	6.8368e-05	1.8143	1.4006e-06
													1.9738	0.00099876	2.065	6.9897e-05	1.8328	1.4459e-06
													1.9923	0.0010087	2.0845	7.1459e-05	1.8516	1.4927e-06
													2.011	0.0010188	2.1042	7.3054e-05	1.8706	1.5409e-06
													2.0298	0.0010289	2.1241	7.4683e-05	1.8898	1.5906e-06
													2.0488	0.0010391	2.1442	7.6347e-05	1.9091	1.6419e-06
													2.068	0.0010494	2.1645	7.8047e-05	1.9287	1.6948e-06
													2.0874	0.0010598	2.185	7.9783e-05	1.9485	1.7493e-06
													2.1069	0.0010703	2.2056	8.1556e-05	1.9684	1.8056e-06
													2.1266	0.0010809	2.2265	8.3366e-05	1.9886	1.8636e-06
													2.1465	0.0010916	2.2475	8.5215e-05	2.009	1.9234e-06
													2.1666	0.0011024	2.2688	8.7103e-05	2.0296	1.985e-06
													2.1869	0.0011132	2.2902	8.9031e-05	2.0504	2.0486e-06
													2.2074	0.0011242	2.3119	9.1e-05	2.0714	2.1142e-06
													2.2281	0.0011352	2.3337	9.301e-05	2.0926	2.1817e-06
													2.2489	0.0011464	2.3558	9.5063e-05	2.1141	2.2514e-06
													2.27	0.0011576	2.3781	9.7159e-05	2.1357	2.3233e-06
													2.2913	0.0011689	2.4005	9.9299e-05	2.1576	2.3973e-06
													2.3127	0.0011803	2.4232	0.00010148	2.1797	2.4737e-06
													2.3344	0.0011919	2.4462	0.00010371	2.2021	2.5524e-06
													2.3562	0.0012035	2.4693	0.00010599	2.2246	2.6335e-06
													2.3783	0.0012152	2.4926	0.00010832	2.2474	2.7171e-06
													2.4006	0.001227	2.5162	0.00011069	2.2705	2.8033e-06
													2.423	0.0012389	2.54	0.00011311	2.2937	2.8922e-06
													2.4457	0.0012509	2.564	0.00011558	2.3172	2.9838e-06
													2.4686	0.001263	2.5882	0.00011811	2.341	3.0782e-06
													2.4917	0.0012752	2.6127	0.00012068	2.365	3.1755e-06
													2.5151	0.0012875	2.6374	0.00012331	2.3892	3.2758e-06
													2.5386	0.0012999	2.6623	0.000126	2.4137	3.3791e-06
													2.5624	0.0013124	2.6875	0.00012874	2.4384	3.4856e-06
													2.5864	0.001325	2.7129	0.00013153	2.4634	3.5954e-06
													2.6106	0.0013377	2.7386	0.00013439	2.4887	3.7085e-06
													2.635	0.0013505	2.7645	0.0001373	2.5142	3.825e-06
													2.6597	0.0013634	2.7906	0.00014027	2.5399	3.9451e-06
													2.6846	0.0013764	2.817	0.0001433	2.566	4.0689e-06
													2.7097	0.0013896	2.8436	0.00014639	2.5923	4.1964e-06
													2.7351	0.0014028	2.8705	0.00014955	2.6188	4.3278e-06
													2.7607	0.0014161	2.8977	0.00015277	2.6457	4.4632e-06
													2.7866	0.0014295	2.925	0.00015606	2.6728	4.6027e-06
													2.8127	0.001443	2.9527	0.00015941	2.7002	4.7464e-06
													2.839	0.0014567	2.9806	0.00016283	2.7278	4.8944e-06
													2.8656	0.0014704	3.0088	0.00016632	2.7558	5.047e-06
													2.8924	0.0014842	3.0372	0.00016988	2.784	5.2041e-06
													2.9195	0.0014982	3.066	0.00017351	2.8126	5.366e-06
													2.9468	0.0015122	3.095	0.00017721	2.8414	5.5328e-06
													2.9744	0.0015264	3.1242	0.00018099	2.8705	5.7045e-06
													3.0023	0.0015406	3.1538	0.00018484	2.8999	5.8815e-06
													3.0304	0.001555	3.1836	0.00018877	2.9296	6.0637e-06
													3.0588	0.0015695	3.2137	0.00019278	2.9597	6.2514e-06
													3.0874	0.0015841	3.2441	0.00019686	2.99	6.4448e-06
													3.1163	0.0015987	3.2747	0.00020103	3.0206	6.6439e-06
													3.1455	0.0016135	3.3057	0.00020528	3.0516	6.849e-06
													3.175	0.0016284	3.3369	0.00020961	3.0829	7.0602e-06
													3.2047	0.0016434	3.3685	0.00021403	3.1145	7.2777e-06
													3.2347	0.0016586	3.4003	0.00021854	3.1464	7.5018e-06
													3.265	0.0016738	3.4325	0.00022313	3.1786	7.7325e-06
													3.2955	0.0016891	3.4649	0.00022782	3.2112	7.97e-06
													3.3264	0.0017046	3.4977	0.00023259	3.2441	8.2146e-06
													3.3575	0.0017201	3.5308	0.00023746	3.2773	8.4665e-06
													3.389	0.0017358	3.5642	0.00024242	3.3109	8.7258e-06
													3.4207	0.0017515	3.5978	0.00024748	3.3449	8.9929e-06
													3.4527	0.0017674	3.6319	0.00025263	3.3791	9.2678e-06
													3.4851	0.0017834	3.6662	0.00025789	3.4138	9.5509e-06
													3.5177	0.0017995	3.7009	0.00026324	3.4487	9.8423e-06
													3.5506	0.0018157	3.7359	0.0002687	3.4841	1.0142e-05
													3.5839	0.001832	3.7712	0.00027426	3.5198	1.0451e-05
													3.6174	0.0018484	3.8068	0.00027993	3.5559	1.0769e-05
													3.6513	0.0018649	3.8428	0.00028571	3.5923	1.1096e-05
													3.6855	0.0018815	3.8792	0.00029159	3.6291	1.1433e-05
													3.72	0.0018983	3.9158	0.00029759	3.6663	1.178e-05
													3.7548	0.0019151	3.9529	0.0003037	3.7039	1.2137e-05
													3.79	0.0019321	3.9902	0.00030993	3.7418	1.2504e-05
													3.8255	0.0019491	4.028	0.00031627	3.7802	1.2883e-05
													3.8613	0.0019663	4.066	0.00032273	3.8189	1.3272e-05
													3.8975	0.0019836	4.1045	0.00032931	3.8581	1.3672e-05
													3.934	0.002001	4.1433	0.00033601	3.8976	1.4085e-05
													3.9708	0.0020184	4.1825	0.00034284	3.9375	1.4509e-05
													4.008	0.002036	4.222	0.0003498	3.9779	1.4945e-05
													4.0455	0.0020537	4.2619	0.00035688	4.0187	1.5395e-05
													4.0834	0.0020716	4.3022	0.00036409	4.0598	1.5857e-05
													4.1216	0.0020895	4.3429	0.00037144	4.1014	1.6332e-05
													4.1602	0.0021075	4.384	0.00037892	4.1435	1.6822e-05
													4.1992	0.0021256	4.4254	0.00038653	4.1859	1.7325e-05
													4.2385	0.0021438	4.4672	0.00039429	4.2288	1.7843e-05
													4.2782	0.0021622	4.5095	0.00040218	4.2722	1.8376e-05
													4.3182	0.0021806	4.5521	0.00041022	4.316	1.8925e-05
													4.3587	0.0021991	4.5952	0.0004184	4.3602	1.9489e-05
													4.3995	0.0022178	4.6386	0.00042674	4.4049	2.0069e-05
													4.4407	0.0022365	4.6825	0.00043521	4.45	2.0666e-05
													4.4822	0.0022553	4.7267	0.00044384	4.4956	2.128e-05
													4.5242	0.0022743	4.7714	0.00045263	4.5417	2.1912e-05
													4.5666	0.0022933	4.8165	0.00046157	4.5882	2.2561e-05
													4.6093	0.0023124	4.8621	0.00047066	4.6352	2.3229e-05
													4.6525	0.0023317	4.908	0.00047992	4.6828	2.3917e-05
													4.6961	0.002351	4.9544	0.00048934	4.7307	2.4623e-05
													4.74	0.0023704	5.0013	0.00049893	4.7792	2.535e-05
													4.7844	0.00239	5.0486	0.00050868	4.8282	2.6098e-05
													4.8292	0.0024096	5.0963	0.0005186	4.8777	2.6866e-05
													4.8744	0.0024293	5.1445	0.00052869	4.9277	2.7657e-05
													4.9201	0.0024491	5.1931	0.00053896	4.9782	2.8469e-05
													4.9661	0.002469	5.2422	0.0005494	5.0292	2.9305e-05
													5.0126	0.002489	5.2918	0.00056002	5.0807	3.0164e-05
													5.0596	0.0025091	5.3418	0.00057083	5.1328	3.1047e-05
													5.1069	0.0025292	5.3923	0.00058181	5.1854	3.1956e-05
													5.1548	0.0025495	5.4433	0.00059298	5.2385	3.2889e-05
													5.203	0.0025698	5.4948	0.00060434	5.2922	3.3849e-05
													5.2517	0.0025902	5.5467	0.00061589	5.3464	3.4836e-05
													5.3009	0.0026107	5.5992	0.00062764	5.4012	3.585e-05
													5.3505	0.0026313	5.6521	0.00063958	5.4566	3.6892e-05
													5.4006	0.002652	5.7055	0.00065171	5.5125	3.7964e-05
													5.4512	0.0026727	5.7595	0.00066405	5.569	3.9065e-05
													5.5023	0.0026936	5.8139	0.00067659	5.6261	4.0197e-05
													5.5538	0.0027145	5.8689	0.00068934	5.6837	4.136e-05
													5.6058	0.0027354	5.9244	0.00070229	5.742	4.2556e-05
													5.6583	0.0027565	5.9804	0.00071546	5.8008	4.3784e-05
													5.7112	0.0027776	6.037	0.00072884	5.8603	4.5047e-05
													5.7647	0.0027988	6.094	0.00074243	5.9203	4.6344e-05
													5.8187	0.0028201	6.1516	0.00075624	5.981	4.7677e-05
													5.8732	0.0028414	6.2098	0.00077027	6.0423	4.9046e-05
													5.9282	0.0028628	6.2685	0.00078452	6.1042	5.0453e-05
													5.9837	0.0028842	6.3278	0.000799	6.1668	5.1898e-05
													6.0397	0.0029058	6.3876	0.00081371	6.23	5.3383e-05
													6.0963	0.0029273	6.448	0.00082864	6.2938	5.4909e-05
													6.1533	0.002949	6.509	0.00084381	6.3583	5.6476e-05
													6.211	0.0029707	6.5705	0.00085922	6.4235	5.8085e-05
													6.2691	0.0029924	6.6326	0.00087486	6.4893	5.9738e-05
													6.3278	0.0030142	6.6953	0.00089074	6.5558	6.1436e-05
													6.3871	0.003036	6.7586	0.00090686	6.623	6.318e-05
													6.4469	0.0030579	6.8225	0.00092323	6.6908	6.4971e-05
													6.5072	0.0030799	6.887	0.00093985	6.7594	6.681e-05
													6.5682	0.0031018	6.9522	0.00095672	6.8287	6.8698e-05
													6.6297	0.0031238	7.0179	0.00097383	6.8987	7.0637e-05
													6.6917	0.0031459	7.0842	0.00099121	6.9694	7.2629e-05
													6.7544	0.003168	7.1512	0.0010088	7.0408	7.4673e-05
													6.8176	0.0031901	7.2188	0.0010267	7.1129	7.6772e-05
													6.8815	0.0032122	7.2871	0.0010449	7.1858	7.8926e-05
													6.9459	0.0032344	7.356	0.0010633	7.2595	8.1138e-05
													7.0109	0.0032566	7.4255	0.001082	7.3339	8.3409e-05
													7.0766	0.0032788	7.4957	0.0011009	7.409	8.5739e-05
													7.1428	0.0033011	7.5666	0.0011201	7.4849	8.8132e-05
													7.2097	0.0033233	7.6382	0.0011396	7.5617	9.0587e-05
													7.2772	0.0033456	7.7104	0.0011594	7.6391	9.3107e-05
													7.3454	0.0033678	7.7833	0.0011794	7.7174	9.5693e-05
													7.4142	0.0033901	7.8569	0.0011998	7.7965	9.8346e-05
													7.4836	0.0034124	7.9311	0.0012204	7.8764	0.00010107
													7.5536	0.0034347	8.0061	0.0012412	7.9571	0.00010386
													7.6244	0.003457	8.0818	0.0012624	8.0387	0.00010673
													7.6958	0.0034792	8.1582	0.0012839	8.1211	0.00010967
													7.7678	0.0035015	8.2354	0.0013056	8.2043	0.00011269
													7.8406	0.0035237	8.3132	0.0013277	8.2884	0.00011578
													7.914	0.0035459	8.3918	0.00135	8.3733	0.00011896
													7.9881	0.0035682	8.4712	0.0013726	8.4591	0.00012222
													8.0629	0.0035903	8.5513	0.0013956	8.5458	0.00012556
													8.1384	0.0036125	8.6321	0.0014188	8.6334	0.00012898
													8.2146	0.0036346	8.7137	0.0014423	8.7218	0.00013249
													8.2915	0.0036567	8.7961	0.0014661	8.8112	0.0001361
													8.3691	0.0036787	8.8793	0.0014902	8.9015	0.00013979
													8.4475	0.0037007	8.9632	0.0015147	8.9927	0.00014358
													8.5266	0.0037227	9.048	0.0015394	9.0849	0.00014746
													8.6064	0.0037446	9.1335	0.0015644	9.178	0.00015144
													8.687	0.0037664	9.2199	0.0015898	9.2721	0.00015553
													8.7683	0.0037882	9.307	0.0016155	9.3671	0.00015971
													8.8504	0.0038099	9.395	0.0016414	9.4631	0.000164
													8.9333	0.0038316	9.4839	0.0016677	9.5601	0.00016839
													9.0169	0.0038532	9.5735	0.0016943	9.658	0.0001729
													9.1014	0.0038747	9.664	0.0017212	9.757	0.00017751
													9.1866	0.0038961	9.7554	0.0017484	9.857	0.00018224
													9.2726	0.0039174	9.8476	0.001776	9.958	0.00018709
													9.3594	0.0039387	9.9407	0.0018038	10.06	0.00019206
													9.4471	0.0039598	10.035	0.001832	10.163	0.00019715
													9.5355	0.0039809	10.13	0.0018605	10.267	0.00020236
													9.6248	0.0040018	10.225	0.0018893	10.373	0.0002077
													9.7149	0.0040226	10.322	0.0019184	10.479	0.00021317
													9.8059	0.0040434	10.42	0.0019478	10.586	0.00021877
													9.8977	0.004064	10.518	0.0019776	10.695	0.00022451
													9.9904	0.0040844	10.618	0.0020076	10.804	0.00023038
													10.084	0.0041048	10.718	0.002038	10.915	0.0002364
													10.178	0.004125	10.819	0.0020687	11.027	0.00024256
													10.274	0.004145	10.922	0.0020997	11.14	0.00024886
													10.37	0.004165	11.025	0.0021311	11.254	0.00025532
													10.467	0.0041847	11.129	0.0021627	11.369	0.00026193
													10.565	0.0042043	11.234	0.0021947	11.486	0.0002687
													10.664	0.0042238	11.341	0.002227	11.604	0.00027562
													10.764	0.0042431	11.448	0.0022596	11.722	0.00028271
													10.865	0.0042622	11.556	0.0022925	11.843	0.00028996
													10.966	0.0042811	11.665	0.0023257	11.964	0.00029738
													11.069	0.0042999	11.776	0.0023592	12.087	0.00030497
													11.173	0.0043184	11.887	0.002393	12.21	0.00031274
													11.277	0.0043368	11.999	0.0024272	12.336	0.00032069
													11.383	0.004355	12.113	0.0024616	12.462	0.00032881
													11.489	0.0043729	12.227	0.0024964	12.59	0.00033713
													11.597	0.0043907	12.343	0.0025314	12.719	0.00034563
													11.706	0.0044082	12.46	0.0025668	12.849	0.00035433
													11.815	0.0044255	12.577	0.0026024	12.981	0.00036322
													11.926	0.0044426	12.696	0.0026383	13.114	0.00037231
													12.037	0.0044594	12.816	0.0026746	13.248	0.0003816
													12.15	0.004476	12.937	0.0027111	13.384	0.0003911
													12.264	0.0044924	13.06	0.0027479	13.521	0.00040081
													12.379	0.0045085	13.183	0.002785	13.66	0.00041074
													12.495	0.0045243	13.308	0.0028223	13.8	0.00042088
													12.612	0.0045399	13.434	0.00286	13.941	0.00043124
													12.73	0.0045552	13.561	0.0028979	14.084	0.00044183
													12.849	0.0045702	13.689	0.0029361	14.228	0.00045265
													12.969	0.0045849	13.818	0.0029745	14.374	0.0004637
													13.091	0.0045994	13.949	0.0030132	14.521	0.00047499
													13.213	0.0046135	14.081	0.0030522	14.67	0.00048652
													13.337	0.0046274	14.214	0.0030914	14.821	0.0004983
													13.462	0.0046409	14.348	0.0031308	14.972	0.00051032
													13.588	0.0046541	14.484	0.0031705	15.126	0.00052259
													13.715	0.004667	14.621	0.0032105	15.281	0.00053512
													13.843	0.0046796	14.759	0.0032506	15.437	0.00054792
													13.973	0.0046918	14.899	0.003291	15.596	0.00056097
													14.104	0.0047037	15.04	0.0033316	15.755	0.0005743
													14.236	0.0047153	15.182	0.0033724	15.917	0.00058789
													14.369	0.0047265	15.325	0.0034135	16.08	0.00060177
													14.504	0.0047373	15.47	0.0034547	16.245	0.00061592
													14.64	0.0047478	15.617	0.0034962	16.411	0.00063035
													14.777	0.0047579	15.764	0.0035378	16.58	0.00064508
													14.915	0.0047676	15.913	0.0035796	16.749	0.0006601
													15.055	0.004777	16.064	0.0036216	16.921	0.00067541
													15.196	0.0047859	16.216	0.0036637	17.094	0.00069102
													15.338	0.0047945	16.369	0.003706	17.27	0.00070693
													15.482	0.0048026	16.524	0.0037485	17.447	0.00072316
													15.627	0.0048104	16.68	0.0037911	17.625	0.00073969
													15.773	0.0048177	16.838	0.0038339	17.806	0.00075654
													15.921	0.0048246	16.997	0.0038767	17.989	0.0007737
													16.07	0.0048311	17.158	0.0039197	18.173	0.00079119
													16.22	0.0048372	17.32	0.0039628	18.359	0.00080901
													16.372	0.0048428	17.483	0.0040061	18.547	0.00082715
													16.525	0.0048479	17.649	0.0040494	18.737	0.00084563
													16.68	0.0048527	17.816	0.0040928	18.929	0.00086444
													16.836	0.0048569	17.984	0.0041362	19.123	0.00088359
													16.994	0.0048608	18.154	0.0041798	19.319	0.00090309
													17.153	0.0048641	18.326	0.0042234	19.517	0.00092293
													17.314	0.004867	18.499	0.004267	19.717	0.00094312
													17.476	0.0048694	18.674	0.0043107	19.919	0.00096366
													17.639	0.0048713	18.85	0.0043544	20.124	0.00098456
													17.804	0.0048727	19.029	0.0043981	20.33	0.0010058
													17.971	0.0048737	19.209	0.0044418	20.538	0.0010274
													18.139	0.0048741	19.39	0.0044855	20.749	0.0010494
													18.309	0.0048741	19.574	0.0045292	20.961	0.0010718
													18.481	0.0048735	19.759	0.0045729	21.176	0.0010945
													18.654	0.0048724	19.945	0.0046165	21.393	0.0011176
													18.828	0.0048708	20.134	0.0046601	21.612	0.001141
													19.005	0.0048687	20.324	0.0047036	21.834	0.0011648
													19.183	0.0048661	20.517	0.004747	22.057	0.0011891
													19.362	0.0048629	20.711	0.0047903	22.284	0.0012136
													19.544	0.0048592	20.906	0.0048335	22.512	0.0012386
													19.727	0.004855	21.104	0.0048766	22.743	0.001264
													19.911	0.0048502	21.304	0.0049196	22.976	0.0012897
													20.098	0.0048449	21.505	0.0049624	23.211	0.0013158
													20.286	0.004839	21.708	0.0050051	23.449	0.0013423
													20.476	0.0048326	21.913	0.0050476	23.689	0.0013692
													20.668	0.0048256	22.121	0.0050899	23.932	0.0013964
													20.861	0.0048181	22.33	0.005132	24.177	0.0014241
													21.056	0.00481	22.541	0.0051739	24.425	0.0014521
													21.254	0.0048014	22.754	0.0052156	24.675	0.0014805
													21.453	0.0047921	22.969	0.005257	24.928	0.0015093
													21.653	0.0047824	23.186	0.0052982	25.184	0.0015385
													21.856	0.004772	23.406	0.0053391	25.442	0.001568
													22.061	0.0047611	23.627	0.0053798	25.703	0.001598
													22.267	0.0047496	23.85	0.0054201	25.966	0.0016283
													22.476	0.0047375	24.076	0.0054601	26.232	0.001659
													22.686	0.0047248	24.303	0.0054997	26.501	0.00169
													22.899	0.0047116	24.533	0.0055391	26.772	0.0017215
													23.113	0.0046978	24.765	0.005578	27.047	0.0017533
													23.33	0.0046834	24.999	0.0056166	27.324	0.0017854
													23.548	0.0046684	25.236	0.0056548	27.604	0.0018179
													23.769	0.0046528	25.474	0.0056926	27.887	0.0018508
													23.991	0.0046367	25.715	0.0057299	28.173	0.001884
													24.216	0.00462	25.958	0.0057668	28.461	0.0019176
													24.442	0.0046027	26.204	0.0058032	28.753	0.0019515
													24.671	0.0045848	26.451	0.0058392	29.048	0.0019858
													24.902	0.0045663	26.701	0.0058747	29.345	0.0020203
													25.135	0.0045472	26.954	0.0059097	29.646	0.0020553
													25.371	0.0045276	27.209	0.0059441	29.95	0.0020905
													25.608	0.0045074	27.466	0.005978	30.257	0.002126
													25.848	0.0044866	27.726	0.0060113	30.567	0.0021618
													26.09	0.0044652	27.988	0.0060441	30.88	0.002198
													26.334	0.0044433	28.252	0.0060763	31.197	0.0022344
													26.581	0.0044208	28.52	0.0061079	31.516	0.0022711
													26.83	0.0043977	28.789	0.0061388	31.839	0.002308
													27.081	0.0043741	29.061	0.0061691	32.166	0.0023452
													27.335	0.0043499	29.336	0.0061988	32.495	0.0023827
													27.591	0.0043251	29.614	0.0062277	32.828	0.0024204
													27.849	0.0042998	29.893	0.006256	33.165	0.0024583
													28.11	0.0042739	30.176	0.0062836	33.505	0.0024964
													28.373	0.0042475	30.461	0.0063105	33.848	0.0025348
													28.639	0.0042205	30.749	0.0063366	34.195	0.0025733
													28.907	0.004193	31.04	0.006362	34.545	0.002612
													29.177	0.004165	31.334	0.0063866	34.899	0.0026508
													29.451	0.0041364	31.63	0.0064104	35.257	0.0026898
													29.726	0.0041073	31.929	0.0064334	35.618	0.002729
													30.005	0.0040777	32.231	0.0064556	35.983	0.0027682
													30.286	0.0040476	32.536	0.006477	36.352	0.0028076
													30.569	0.004017	32.843	0.0064975	36.724	0.002847
													30.855	0.0039858	33.154	0.0065171	37.101	0.0028865
													31.144	0.0039542	33.467	0.0065359	37.481	0.0029261
													31.436	0.0039221	33.784	0.0065538	37.865	0.0029657
													31.73	0.0038895	34.103	0.0065708	38.253	0.0030053
													32.027	0.0038564	34.425	0.0065868	38.645	0.0030449
													32.327	0.0038229	34.751	0.0066019	39.041	0.0030844
													32.63	0.0037889	35.079	0.0066161	39.441	0.003124
													32.936	0.0037544	35.411	0.0066293	39.845	0.0031634
													33.244	0.0037196	35.746	0.0066416	40.254	0.0032028
													33.555	0.0036842	36.084	0.0066528	40.666	0.0032421
													33.869	0.0036485	36.425	0.0066631	41.083	0.0032812
													34.187	0.0036123	36.769	0.0066723	41.504	0.0033202
													34.507	0.0035758	37.117	0.0066805	41.929	0.0033591
													34.83	0.0035388	37.468	0.0066877	42.359	0.0033977
													35.156	0.0035014	37.822	0.0066939	42.793	0.0034361
													35.485	0.0034637	38.18	0.006699	43.232	0.0034743
													35.817	0.0034256	38.541	0.006703	43.675	0.0035122
													36.153	0.0033872	38.905	0.0067059	44.122	0.0035498
													36.491	0.0033484	39.273	0.0067078	44.575	0.003587
													36.833	0.0033092	39.644	0.0067085	45.031	0.003624
													37.178	0.0032698	40.019	0.0067082	45.493	0.0036606
													37.526	0.00323	40.398	0.0067067	45.959	0.0036967
													37.877	0.0031899	40.779	0.0067042	46.43	0.0037325
													38.232	0.0031496	41.165	0.0067005	46.906	0.0037678
													38.59	0.0031089	41.554	0.0066956	47.387	0.0038026
													38.951	0.003068	41.947	0.0066897	47.872	0.0038369
													39.316	0.0030268	42.344	0.0066826	48.363	0.0038707
													39.684	0.0029854	42.744	0.0066743	48.858	0.003904
													40.056	0.0029438	43.148	0.0066649	49.359	0.0039366
													40.431	0.0029019	43.556	0.0066543	49.865	0.0039686
													40.809	0.0028598	43.968	0.0066426	50.376	0.004
													41.191	0.0028176	44.384	0.0066297	50.892	0.0040307
													41.577	0.0027751	44.803	0.0066157	51.414	0.0040608
													41.966	0.0027325	45.227	0.0066004	51.941	0.00409
													42.359	0.0026897	45.654	0.0065841	52.473	0.0041186
													42.756	0.0026468	46.086	0.0065665	53.011	0.0041463
													43.156	0.0026038	46.522	0.0065478	53.554	0.0041733
													43.56	0.0025606	46.962	0.0065279	54.103	0.0041993
													43.968	0.0025173	47.406	0.0065069	54.657	0.0042246
													44.38	0.002474	47.854	0.0064847	55.217	0.0042489
													44.795	0.0024306	48.306	0.0064613	55.783	0.0042723
													45.215	0.0023871	48.763	0.0064368	56.355	0.0042948
													45.638	0.0023435	49.224	0.0064111	56.932	0.0043162
													46.066	0.0023	49.69	0.0063843	57.516	0.0043367
													46.497	0.0022564	50.159	0.0063564	58.105	0.0043562
													46.932	0.0022128	50.634	0.0063273	58.701	0.0043746
													47.372	0.0021692	51.112	0.0062971	59.302	0.0043919
													47.815	0.0021256	51.596	0.0062658	59.91	0.0044081
													48.263	0.002082	52.083	0.0062334	60.524	0.0044232
													48.715	0.0020385	52.576	0.0061999	61.144	0.0044371
													49.171	0.0019951	53.073	0.0061653	61.771	0.0044498
													49.631	0.0019517	53.575	0.0061297	62.404	0.0044614
													50.096	0.0019084	54.081	0.0060929	63.043	0.0044717
													50.565	0.0018652	54.592	0.0060552	63.689	0.0044809
													51.039	0.0018221	55.109	0.0060163	64.342	0.0044887
													51.516	0.0017792	55.63	0.0059765	65.001	0.0044953
													51.999	0.0017364	56.156	0.0059357	65.668	0.0045005
													52.486	0.0016937	56.687	0.0058938	66.34	0.0045045
													52.977	0.0016512	57.223	0.005851	67.02	0.0045072
													53.473	0.0016088	57.764	0.0058072	67.707	0.0045085
													53.974	0.0015667	58.31	0.0057625	68.401	0.0045084
													54.479	0.0015248	58.861	0.0057169	69.102	0.004507
													54.989	0.001483	59.417	0.0056703	69.81	0.0045042
													55.504	0.0014415	59.979	0.0056229	70.526	0.0045
													56.024	0.0014002	60.546	0.0055746	71.248	0.0044944
													56.549	0.0013592	61.119	0.0055254	71.978	0.0044874
													57.078	0.0013184	61.697	0.0054754	72.716	0.0044791
													57.612	0.0012779	62.28	0.0054247	73.461	0.0044692
													58.152	0.0012377	62.869	0.0053731	74.214	0.004458
													58.696	0.0011978	63.463	0.0053208	74.975	0.0044454
													59.246	0.0011581	64.063	0.0052677	75.743	0.0044313
													59.801	0.0011188	64.669	0.005214	76.519	0.0044158
													60.361	0.0010798	65.28	0.0051596	77.303	0.0043989
													60.926	0.0010412	65.898	0.0051045	78.096	0.0043806
													61.496	0.0010028	66.521	0.0050487	78.896	0.0043609
													62.072	0.00096485	67.15	0.0049924	79.704	0.0043398
													62.653	0.00092723	67.784	0.0049355	80.521	0.0043173
													63.24	0.00088998	68.425	0.004878	81.346	0.0042934
													63.832	0.00085311	69.072	0.00482	82.18	0.0042681
													64.43	0.00081662	69.725	0.0047615	83.022	0.0042415
													65.033	0.00078052	70.384	0.0047026	83.873	0.0042135
													65.642	0.00074482	71.05	0.0046432	84.733	0.0041842
													66.257	0.00070953	71.722	0.0045834	85.601	0.0041536
													66.877	0.00067465	72.4	0.0045232	86.478	0.0041218
													67.503	0.00064019	73.084	0.0044626	87.364	0.0040886
													68.135	0.00060616	73.775	0.0044018	88.26	0.0040543
													68.773	0.00057256	74.473	0.0043406	89.164	0.0040187
													69.417	0.0005394	75.177	0.0042792	90.078	0.0039819
													70.067	0.00050668	75.888	0.0042176	91.001	0.0039439
													70.723	0.00047441	76.605	0.0041557	91.934	0.0039048
													71.385	0.0004426	77.329	0.0040937	92.876	0.0038646
													72.054	0.00041124	78.061	0.0040316	93.828	0.0038234
													72.729	0.00038034	78.799	0.0039693	94.789	0.0037811
													73.409	0.00034991	79.544	0.0039069	95.76	0.0037378
													74.097	0.00031995	80.296	0.0038446	96.742	0.0036935
													74.791	0.00029046	81.055	0.0037822	97.733	0.0036483
													75.491	0.00026145	81.821	0.0037198	98.735	0.0036022
													76.198	0.00023291	82.595	0.0036574	99.747	0.0035552
													76.911	0.00020485	83.376	0.0035952	100.77	0.0035075
													77.631	0.00017727	84.164	0.003533	101.8	0.0034589
													78.358	0.00015018	84.96	0.003471	102.84	0.0034097
													79.092	0.00012357	85.763	0.0034091	103.9	0.0033597
													79.833	9.7443e-05	86.574	0.0033474	104.96	0.0033091
													80.58	7.1802e-05	87.392	0.003286	106.04	0.003258
													81.335	4.6649e-05	88.219	0.0032248	107.13	0.0032062
													82.096	2.1975e-05	89.053	0.0031639	108.22	0.003154
													82.865	-2.207e-06	89.895	0.0031033	109.33	0.0031013
													83.641	-2.5908e-05	90.745	0.003043	110.45	0.0030482
													84.424	-4.9126e-05	91.603	0.0029831	111.59	0.0029947
													85.214	-7.1863e-05	92.469	0.0029235	112.73	0.0029409
													86.012	-9.4118e-05	93.343	0.0028644	113.88	0.0028869
													86.818	-0.0001159	94.225	0.0028058	115.05	0.0028326
													87.63	-0.0001372	95.116	0.0027476	116.23	0.0027782
													88.451	-0.00015802	96.016	0.0026898	117.42	0.0027236
													89.279	-0.00017838	96.923	0.0026326	118.62	0.002669
													90.115	-0.00019826	97.84	0.002576	119.84	0.0026143
													90.959	-0.00021768	98.765	0.0025199	121.07	0.0025597
													91.811	-0.00023664	99.699	0.0024643	122.31	0.0025051
													92.67	-0.00025514	100.64	0.0024094	123.56	0.0024507
													93.538	-0.00027319	101.59	0.0023551	124.83	0.0023964
													94.414	-0.00029079	102.55	0.0023015	126.11	0.0023423
													95.298	-0.00030793	103.52	0.0022485	127.4	0.0022885
													96.19	-0.00032464	104.5	0.0021961	128.71	0.002235
													97.091	-0.00034092	105.49	0.0021445	130.02	0.0021818
													98	-0.00035675	106.49	0.0020936	131.36	0.002129
													98.917	-0.00037216	107.49	0.0020434	132.7	0.0020766
													99.844	-0.00038715	108.51	0.0019939	134.06	0.0020247
													100.78	-0.00040173	109.54	0.0019452	135.44	0.0019733
													101.72	-0.00041589	110.57	0.0018973	136.83	0.0019224
													102.67	-0.00042965	111.62	0.0018502	138.23	0.0018721
													103.64	-0.00044301	112.67	0.0018038	139.64	0.0018224
													104.61	-0.00045597	113.74	0.0017582	141.07	0.0017734
													105.59	-0.00046855	114.81	0.0017135	142.52	0.001725
													106.57	-0.00048074	115.9	0.0016696	143.98	0.0016774
													107.57	-0.00049257	116.99	0.0016265	145.46	0.0016305
													108.58	-0.00050402	118.1	0.0015842	146.95	0.0015843
													109.6	-0.00051511	119.22	0.0015428	148.45	0.001539
													110.62	-0.00052585	120.34	0.0015022	149.97	0.0014944
													111.66	-0.00053623	121.48	0.0014625	151.51	0.0014507
													112.7	-0.00054628	122.63	0.0014236	153.06	0.0014079
													113.76	-0.00055599	123.79	0.0013856	154.63	0.0013659
													114.82	-0.00056537	124.96	0.0013484	156.22	0.0013249
													115.9	-0.00057443	126.14	0.0013121	157.82	0.0012847
													116.98	-0.00058317	127.33	0.0012767	159.44	0.0012455
													118.08	-0.00059161	128.54	0.0012421	161.07	0.0012072
													119.19	-0.00059975	129.75	0.0012083	162.72	0.0011698
													120.3	-0.00060759	130.98	0.0011754	164.39	0.0011334
													121.43	-0.00061515	132.22	0.0011434	166.07	0.001098
													122.56	-0.00062243	133.47	0.0011122	167.77	0.0010635
													123.71	-0.00062943	134.73	0.0010819	169.49	0.00103
													124.87	-0.00063616	136	0.0010523	171.23	0.00099745
													126.04	-0.00064264	137.29	0.0010236	172.99	0.00096589
													127.22	-0.00064886	138.59	0.00099578	174.76	0.0009353
													128.41	-0.00065484	139.9	0.00096873	176.55	0.00090568
													129.61	-0.00066058	141.22	0.00094248	178.36	0.00087703
													130.83	-0.00066609	142.56	0.00091703	180.19	0.00084933
													132.05	-0.00067137	143.9	0.00089236	182.03	0.00082258
													133.29	-0.00067643	145.27	0.00086848	183.9	0.00079678
													134.54	-0.00068128	146.64	0.00084536	185.78	0.00077191
													135.8	-0.00068593	148.03	0.00082301	187.69	0.00074795
													137.07	-0.00069037	149.42	0.00080139	189.61	0.00072492
													138.35	-0.00069462	150.84	0.00078052	191.55	0.00070277
													139.65	-0.00069868	152.26	0.00076036	193.52	0.00068151
													140.95	-0.00070256	153.7	0.00074091	195.5	0.00066111
													142.27	-0.00070627	155.16	0.00072216	197.5	0.00064157
													143.61	-0.00070981	156.62	0.0007041	199.53	0.00062286
													144.95	-0.00071318	158.1	0.0006867	201.57	0.00060497
													146.31	-0.0007164	159.6	0.00066996	203.64	0.00058787
													147.68	-0.00071946	161.11	0.00065386	205.72	0.00057155
													149.06	-0.00072238	162.63	0.00063839	207.83	0.00055599
													150.46	-0.00072515	164.17	0.00062354	209.96	0.00054117
													151.87	-0.00072779	165.72	0.00060928	212.11	0.00052707
													153.29	-0.0007303	167.29	0.00059561	214.29	0.00051367
													154.72	-0.00073268	168.87	0.0005825	216.48	0.00050094
													156.17	-0.00073495	170.47	0.00056995	218.7	0.00048887
													157.63	-0.00073709	172.08	0.00055794	220.94	0.00047744
													159.11	-0.00073913	173.7	0.00054645	223.21	0.00046661
													160.6	-0.00074106	175.35	0.00053547	225.5	0.00045638
													162.1	-0.00074288	177	0.00052499	227.81	0.00044672
													163.62	-0.00074461	178.68	0.00051499	230.14	0.0004376
													165.15	-0.00074624	180.37	0.00050545	232.5	0.00042901
													166.7	-0.00074779	182.07	0.00049636	234.88	0.00042092
													168.26	-0.00074925	183.79	0.0004877	237.29	0.00041332
													169.84	-0.00075063	185.53	0.00047947	239.72	0.00040618
													171.43	-0.00075192	187.29	0.00047164	242.18	0.00039948
													173.03	-0.00075315	189.06	0.0004642	244.66	0.00039321
													174.65	-0.0007543	190.84	0.00045714	247.17	0.00038734
													176.29	-0.00075539	192.65	0.00045045	249.7	0.00038186
													177.94	-0.00075641	194.47	0.0004441	252.26	0.00037673
													179.6	-0.00075737	196.31	0.00043809	254.84	0.00037196
													181.29	-0.00075827	198.16	0.0004324	257.46	0.00036751
													182.98	-0.00075912	200.04	0.00042702	260.09	0.00036337
													184.7	-0.00075991	201.93	0.00042194	262.76	0.00035953
													186.43	-0.00076065	203.84	0.00041714	265.45	0.00035596
													188.17	-0.00076135	205.77	0.00041262	268.17	0.00035266
													189.93	-0.000762	207.71	0.00040835	270.92	0.0003496
													191.71	-0.00076262	209.68	0.00040434	273.7	0.00034678
													193.51	-0.00076318	211.66	0.00040056	276.5	0.00034417
													195.32	-0.00076372	213.66	0.00039701	279.33	0.00034176
													197.15	-0.00076422	215.68	0.00039367	282.2	0.00033955
													198.99	-0.00076468	217.72	0.00039055	285.09	0.00033751
													200.86	-0.00076511	219.78	0.00038761	288.01	0.00033564
													202.74	-0.00076551	221.85	0.00038486	290.96	0.00033393
													204.63	-0.00076589	223.95	0.00038229	293.94	0.00033236
													206.55	-0.00076624	226.07	0.00037988	296.96	0.00033093
													208.49	-0.00076656	228.21	0.00037764	300	0.00032962
