# Supplementary material for: Single turnover transient state kinetics reveals processive protein unfolding catalyzed by Escherichia coli ClpB
Source: eLife. 2024 Oct 7;13:RP99052. doi: 10.7554/eLife.99052 (PMC11458177; doi:10.7554/eLife.99052)
Supplement: Figure 4—figure supplement 3—source data 1. — The error bars for each kU are tabulated as standard deviation. The sheet labeled ‘Figure B’ consists of data points for step-size, m as a function of Δt1, represented in Figure 4—figure supplement 3B. The error bars for each m are tabulated as standard deviation. The sheet labeled ‘Figure C’ consists of data points for step-size, mkU as a function of Δt1, represented in Figure 4—figure supplement 3C. The error bars for each mkU are tabulated as standard deviation. [file elife-99052-fig4-figsupp3-data1.xlsx]

## Sheet: Supp Fig A
Dt1 (s)	ku (s-1)	Standard deviation (s-1)
300	0.064897	0.022951
420	0.059194	0.0071509
600	0.047156	0.0090038

## Sheet: Supp Fig B
Dt1 (s)	m (aa)	Standard deviation (aa)
300	57.228	9.4161
420	52.882	5.8277
600	64.576	5.9266

## Sheet: Supp Fig C
Dt1 (s)	m ku (aa s-1)	Standard deviation (aa s-1)
300	3.5705	0.76242
420	3.1067	0.19922
600	3.0175	0.37845
