# Supplementary material for: Single turnover transient state kinetics reveals processive protein unfolding catalyzed by Escherichia coli ClpB
Source: eLife. 2024 Oct 7;13:RP99052. doi: 10.7554/eLife.99052 (PMC11458177; doi:10.7554/eLife.99052)
Supplement: Figure 4—source data 1. — The error bars for each kU are tabulated as standard deviation. The sheet labeled ‘Figure 4C’ consists of data points for step-size, m as a function of Δt1, represented in Figure 4C. The error bars for each m are tabulated as standard deviation. The sheet labeled ‘Figure 4D’ consists of data points for step-size, mkU as a function of Δt1, represented in Figure 4D. The error bars for each mkU are tabulated as standard deviation. [file elife-99052-fig4-data1.xlsx]

## Sheet: Figure 4 B
Dt1 (s)	ku (s-1)	Standard deviation (s-1)
300	0.014558	0.0020234
420	0.02088	0.0028877
600	0.017501	0.0059811

## Sheet: Figure 4 C
Dt1 (s)	m (aa)	Standard deviation (aa)
300	56.6	0.65092
420	47.266	8.1603
600	48.784	5.922

## Sheet: Figure 4 D
Dt1 (s)	m ku (aa s-1)	Standard deviation (aa s-1)
300	0.82452	0.11966
420	0.97811	0.14598
600	0.87561	0.39426
